# Supplementary material for: A solvent-free catalytic protocol for the Achmatowicz rearrangement
Source: Royal Society of Chemistry journal article supplement (doi:10.1039/c8gc03030h), 2018-11-19
Supplement: c8gc03030h1.pdf [file c8gc03030h1.pdf]

Electronic Supplementary Information  
**A Solvent-Free Catalytic Protocol for Achmatowicz Rearrangement**

Guodong Zhao<sup>a</sup> and Rongbiao Tong<sup>a,b,\*</sup>

<sup>a</sup>Department of Chemistry, The Hong Kong University of Science and Technology,  
Clearwater Bay, Kowloon, Hong Kong, China.

<sup>b</sup>HKUST Shenzhen Research Institute, Shenzhen 518057, China

E-mail: [rtong@ust.hk](mailto:rtong@ust.hk)

Table of Contents

|                                                                |      |
|----------------------------------------------------------------|------|
| General Information.....                                       | S-2  |
| E-Factor Analysis.....                                         | S-3  |
| Full Experimental Details and Spectroscopic Data.....          | S-4  |
| Reference.....                                                 | S-24 |
| Copies of <sup>1</sup> H- and <sup>13</sup> C-NMR Spectra..... | S-25 |

## General Information

Reactions were carried out in a glassware with vigorous stirring at RT, and no special operation was needed.  $\text{Al}_2\text{O}_3$  (Merck KGaA, 0.063–0.200 mm, pH = 6.8–7.8) was equilibrated at 120 °C for 48 h before use. Oxone, KBr and  $\text{NaHCO}_3$  were all ground to be fine powder before use. Dichloromethane was freshly distilled before use from calcium hydride ( $\text{CaH}_2$ ). Solvents used in column chromatography were used as received from commercial suppliers without prior purification. Reactions were monitored by thin-layer chromatography (TLC, 0.25 mm) on pre-coated silica gel plates. Flash chromatography was performed with silica gel 60 (particle size 0.040–0.062 mm).  $^1\text{H}$ - and  $^{13}\text{C}$ -NMR spectra were recorded on a 400 MHz spectrometer (400 MHz for  $^1\text{H}$ , 100 MHz for  $^{13}\text{C}$ ). Chemical shifts are reported in parts per million (ppm) as values relative to the internal chloroform (7.26 ppm for  $^1\text{H}$  and 77.16 ppm for  $^{13}\text{C}$ ), methanol (3.31 ppm for  $^1\text{H}$  and 49.00 ppm for  $^{13}\text{C}$ ), and DMSO (2.5 ppm for  $^1\text{H}$  and 39.52 ppm for  $^{13}\text{C}$ ). Abbreviations for signal coupling are as follows: s, singlet; d, doublet; t, triplet; q, quartet; m, multiplet.

## E-Factor Analysis

### Example A (this work):

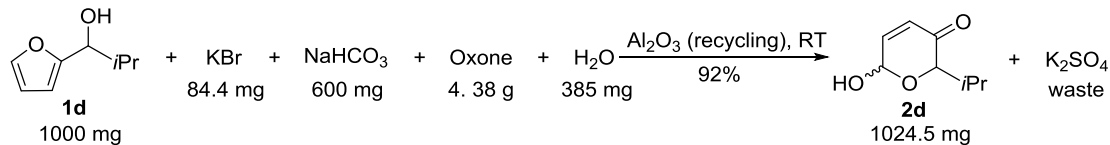

Total amount of reactants: 1000 mg + 84.4 mg + 600 mg + 4380 mg + 385 mg = 6449.4 mg

Amount of final product: 1024.5 mg

Amount of waste: 6449.4 mg – 1024.5 mg = 5424.9 mg

E-Factor = Amount of waste/Amount of product = 5424.9/1024.5 = 5.30

### Example B (Z. Li and R. Tong, *J. Org. Chem.*, 2016, 81, 4847-4855):

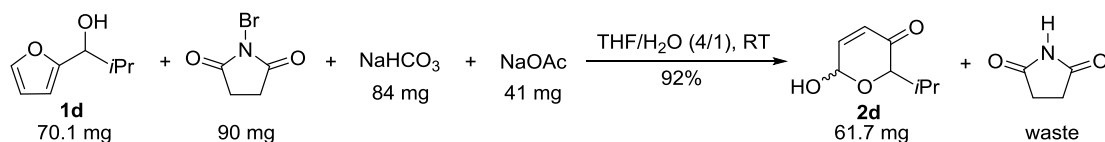

Total amount of reactants: 70.1 mg + 90 mg + 84 mg + 41 mg = 285.1 mg

Amount of final product: 61.7 mg

Amount of waste: 285.1 mg – 61.7 mg = 223.4 mg

E-Factor = Amount of waste/Amount of product = 223.4/61.7 = 3.62

### Example C (Z. Li and R. Tong, *J. Org. Chem.*, 2016, 81, 4847-4855):

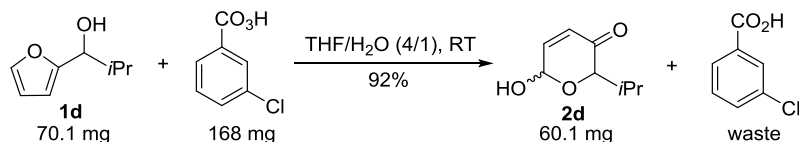

Total amount of reactants: 70.1 mg + 168 mg = 238.1 mg

Amount of final product: 60.1 mg

Amount of waste: 238.1 mg – 60.1 mg = 178 mg

E-Factor = Amount of waste/Amount of product = 178/60.1 = 2.96

## Full Experimental Details and Spectroscopic Data

Substrates **1b–g**, **1j–m**, **1o**, **1t**, **1x**, **1z** and **1ab**, were prepared according to the published procedure<sup>1-12</sup>. The <sup>1</sup>H- and <sup>13</sup>C-NMR data of the above substrates were identical to the published literature, which were listed as follows. General Procedure A for the synthesis of substrates **1n** and **1p**; General Procedure B for the synthesis of substrates **1y**, **1aa** and **1ac**; General procedure C for the synthesis of substrates **1r–s**, **1u–w**; General procedure D for the synthesis of substrates **1q**, **1h–i**.

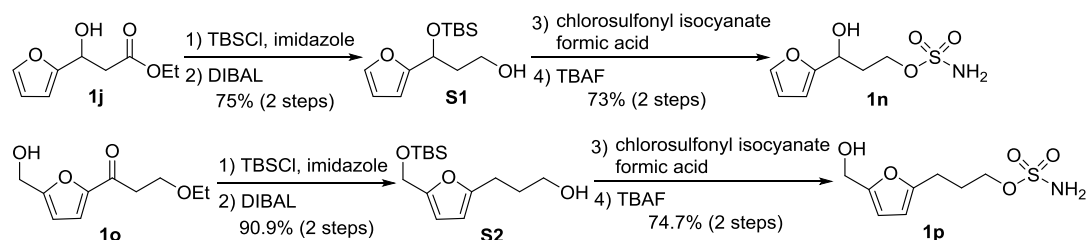

**General Procedure A:** To a stirred solution of the compound **1j**<sup>3</sup> (1.77 g, 9.61 mmol) in anhydrous DCM (40 mL) were added imidazole (1.3 g, 19.2 mmol) and TBSCl (2.17 g, 14.4 mmol) at 0 °C. After completion of the addition, the reaction mixture was allowed to warm to room temperature and stirred for 12 h. The reaction was quenched by addition of water (100 mL). The organic fractions were collected, and the aqueous phase was extracted with DCM (3 × 30 mL). The combined organic fractions were washed with saturated aqueous NH<sub>4</sub>Cl solution and brine, dried over Na<sub>2</sub>SO<sub>4</sub>, filtered, and concentrated under reduced pressure. The crude protection product was used for the next step without further purification. To a stirred solution of the above residue in THF (80 mL) was added DIBAL (40 mL, 1M in hexane, 40 mmol) dropwise at 0 °C. After completion of the addition, the reaction mixture was stirred for 0.5 h at the same temperature. The reaction was quenched by saturated aqueous NH<sub>4</sub>Cl solution (200 mL), and the residue was extracted with EtOAc (3 × 50 mL). The combined organic fractions were washed with brine, dried over Na<sub>2</sub>SO<sub>4</sub>, filtered and concentrated under reduced pressure. The resulting residue was purified by flash column chromatography (EtOAc/hexane = 1:2) to give the alcohol **S1**.

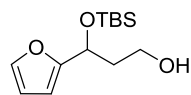

**S1**: colorless oil, 1.33 g, 75% yield for 2 steps. <sup>1</sup>H-NMR (400 MHz, CDCl<sub>3</sub>) δ: 7.34 (d, *J* = 1.0 Hz, 1H), 6.31 (dd, *J* = 3.2, 1.8 Hz, 1H), 6.23–6.16 (m, 1H), 4.97 (dd, *J* = 7.4, 4.6 Hz, 1H), 3.84–3.66 (m, 2H), 2.15–1.95 (m, 2H), 0.87 (s, 9H), 0.07 (s, 3H), -0.09 (s, 3H). <sup>13</sup>C-NMR (100 MHz, CDCl<sub>3</sub>) δ: 156.4, 141.6, 110.2, 106.3, 67.8, 60.3, 38.8, 25.9, 18.2, -4.9, -5.2.

To a stirred solution of chlorosulfonyl isocyanate (0.54 mL, 6.2 mmol) in anhydrous DCM (2 mL) was added formic acid (0.23 mL, 6.2 mmol) at 0 °C. After completion of the addition,



the resulting mixture was allowed to stir for an additional 0.5 h. The above mixture was then added to a solution of **S1** (0.53 g, 2.07 mmol) and pyridine (0.75 mL, 9.3 mmol) in THF (10 mL), and the mixture was stirred at 0 °C for 0.5 h. The reaction was quenched by addition of water (100 mL), and the aqueous phase was extracted with EtOAc (3 × 30 mL). The combined organic fractions were washed with brine, dried over Na<sub>2</sub>SO<sub>4</sub>, filtered and concentrated under reduced pressure. The crude product was used for the next step without further purification. To a stirred solution of the above residue in THF (10 mL) was added TBAF (1.08 g, 4.14 mmol), and the reaction mixture was stirred for 0.5 h at room temperature. Then the mixture was concentrated and purified by flash column chromatography (EtOAc/hexane = 3:1) to give the desired compound **1n**.

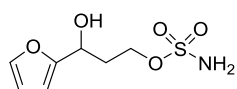

**1n**: colorless oil, 0.33 g, 73% yield for 2 steps. <sup>1</sup>H-NMR (400 MHz, DMSO) δ: 7.59–7.58 (m, 1H), 7.45 (s, 2H), 6.40 (dd, *J* = 3.2, 1.8 Hz, 1H), 6.29 (d, *J* = 3.2 Hz, 1H), 5.49 (s, 1H), 4.74–4.60 (m, 1H), 4.18–4.07 (m, 2H), 2.09–2.04 (m, 2H). <sup>13</sup>C-NMR (100 MHz, DMSO) δ: 157.6, 142.4, 110.7, 106.1, 66.5, 62.8, 35.2. IR (KBr) 3282.9, 2928.7, 1627.4, 1562.5, 1353.8, 1174.6, 1074.0, 999.7, 918.4, 742.8 cm<sup>-1</sup>; HRMS (CI<sup>+</sup>) (*m/z*) calcd. for C<sub>7</sub>H<sub>11</sub>NO<sub>5</sub>S [M]<sup>+</sup> 221.0352; found 221.0354.

Substrate **1p** were synthesized from **1o**<sup>11</sup> (0.4 g, 2 mmol), and the detailed procedures were carried out as above.

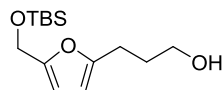

**S2**: colorless oil, 0.49 g, 90.9% for 2 steps. <sup>1</sup>H-NMR (400 MHz, CDCl<sub>3</sub>) δ: 6.11 (d, *J* = 3.1 Hz, 1H), 5.93 (d, *J* = 3.1 Hz, 1H), 4.58 (s, 2H), 3.68 (t, *J* = 6.3 Hz, 2H), 2.71 (t, *J* = 7.5 Hz, 2H), 1.89 (ddd, *J* = 13.8, 7.5, 6.4 Hz, 2H), 0.89 (s, 9H), 0.07 (s, 6H). <sup>13</sup>C-NMR (100 MHz, CDCl<sub>3</sub>) δ: 155.3, 152.7, 108.1, 105.8, 62.2, 58.3, 31.1, 26.0, 24.5, 18.5, -5.1.

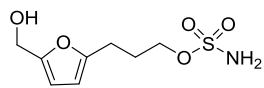

**1p**: colorless oil, 0.32 g, 74.7% for 2 steps. <sup>1</sup>H-NMR (400 MHz, DMSO) δ: 7.46 (s, 2H), 6.16 (d, *J* = 3.0 Hz, 1H), 6.06 (d, *J* = 3.0 Hz, 1H), 5.12 (t, *J* = 5.7 Hz, 1H), 4.33 (d, *J* = 5.7 Hz, 2H), 4.07 (t, *J* = 6.4 Hz, 2H), 2.67 (t, *J* = 7.6 Hz, 2H), 2.07–1.82 (m, 2H). <sup>13</sup>C-NMR (100 MHz, DMSO) δ: 154.4, 154.1, 108.0, 106.4, 68.6, 56.1, 27.5, 24.1. IR (KBr) 3282.6, 2939.1, 1562.4, 1446.7, 1356.8, 1174.9, 931.3, 795.3, 753.3 cm<sup>-1</sup>; HRMS (CI<sup>+</sup>) (*m/z*) calcd. for C<sub>8</sub>H<sub>13</sub>NO<sub>5</sub>S [M]<sup>+</sup> 235.0509; found 235.0508.

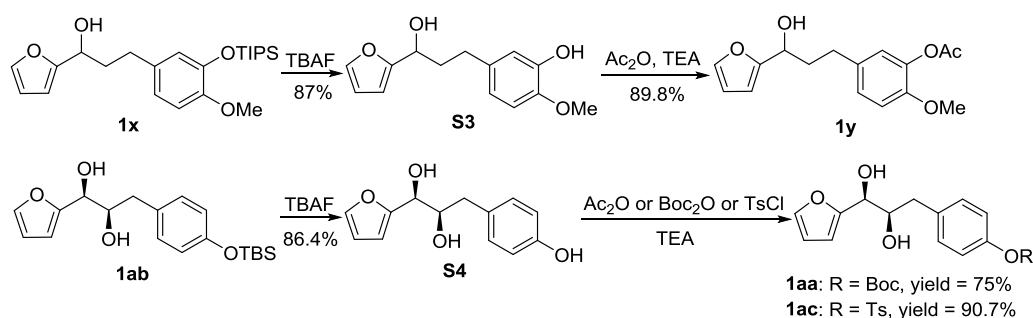

**General Procedure B:** To a stirred solution of **1x**<sup>8</sup> or **1ab**<sup>9</sup> (2.1 mmol) in THF (10 mL) was added TBAF (1.1 g, 4.2 mmol), and the reaction was stirred for 0.5 h at room temperature. Then the mixture was concentrated and purified by flash column chromatography (EtOAc/hexane = 3:2 to EA) to give the desired compound **S3** or **S4**.

**S3**: colorless oil, 0.45 g, 87%. <sup>1</sup>H-NMR (400 MHz, CDCl<sub>3</sub>) δ: 7.37 (dd, *J* = 1.9, 0.8 Hz, 1H), 6.84–6.72 (m, 2H), 6.67 (dd, *J* = 8.2, 2.1 Hz, 1H), 6.33 (dd, *J* = 3.3, 1.8 Hz, 1H), 6.23 (dd, *J* = 3.1, 0.7 Hz, 1H), 5.64 (s, 1H), 4.66 (t, *J* = 6.8 Hz, 1H), 3.86 (s, 3H), 2.73–2.55 (m, 2H), 2.19–2.08 (m, 2H). <sup>13</sup>C-NMR (100 MHz, CDCl<sub>3</sub>) δ: 156.6, 145.5, 144.9, 142.0, 134.8, 119.8, 114.8, 110.7, 110.2, 106.0, 66.9, 56.0, 37.0, 31.1.

**S4**: colorless oil, 0.42 g, 86.4%. <sup>1</sup>H-NMR (400 MHz, DMSO) δ: 9.11 (s, 1H), 7.56 (dd, *J* = 1.9, 0.8 Hz, 1H), 7.00–6.92 (m, 2H), 6.69–6.58 (m, 2H), 6.40 (dd, *J* = 3.2, 1.8 Hz, 1H), 6.30 (d, *J* = 3.2 Hz, 1H), 5.28 (d, *J* = 5.6 Hz, 1H), 4.62 (d, *J* = 5.9 Hz, 1H), 4.39–4.29 (m, 1H), 3.77 (dd, *J* = 8.9, 4.7 Hz, 1H), 2.57 (dd, *J* = 13.8, 4.3 Hz, 1H), 2.40 (dd, *J* = 13.8, 8.3 Hz, 1H). <sup>13</sup>C-NMR (100 MHz, DMSO) δ: 156.7, 155.8, 142.0, 130.5, 130.0, 115.2, 110.6, 107.1, 74.5, 69.9, 38.6.

To a stirred solution of the compound **S3** or **S4** (0.8 mmol) in anhydrous THF (5 mL) were added TEA (0.45 mL, 3.2 mmol) and Ac<sub>2</sub>O, Boc<sub>2</sub>O or Ts (1.3 mmol) at 0 °C. After completion of the addition, the reaction mixture was allowed to stir at 0 °C for 0.5 h. The reaction was quenched by addition of water (50 mL). The mixture was extracted with EtOAc (3 × 30 mL). The combined organic fractions were washed with brine, dried over Na<sub>2</sub>SO<sub>4</sub>, filtered and concentrated under reduced pressure. The residue was purified by flash column chromatography (EtOAc/hexane = 1:3 to 1:1) to give the product **1y**, **1aa** or **1ac**.

**1y**: colorless oil, 0.21 g, 89.8%. <sup>1</sup>H-NMR (400 MHz, CDCl<sub>3</sub>) δ: 7.37 (dd, *J* = 1.9, 0.8 Hz, 1H), 7.02 (dd, *J* = 8.3, 2.2 Hz, 1H), 6.88 (dd, *J* = 5.3, 3.1 Hz, 2H), 6.33 (dd, *J* = 3.3, 1.8 Hz, 1H), 6.23 (d, *J* = 3.2 Hz, 1H), 4.66 (t, *J* = 6.8 Hz, 1H), 3.80 (s, 3H), 2.74–2.60 (m, 2H), 2.30 (s, 3H), 2.21–2.04 (m, 2H). <sup>13</sup>C-NMR (100 MHz, CDCl<sub>3</sub>) δ: 169.2, 156.5, 149.3, 142.0, 139.6, 134.1, 126.6, 122.8, 112.4, 110.2, 106.0, 66.8, 56.0, 36.9, 30.7, 20.7. IR (KBr) 3420.0, 2936.4, 2847.2, 1759.3, 1509.7, 1439.5, 1369.3, 1266.1, 1198.9, 1120.4,

1012.0, 811.0, 739.7  $\text{cm}^{-1}$ ; HRMS ( $\text{CI}^+$ ) ( $m/z$ ) calcd. for  $\text{C}_{16}\text{H}_{18}\text{O}_5$  [ $\text{M}$ ] $^+$  290.1149; found 290.1143.

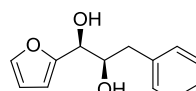

**1aa**: colorless oil, 0.2 g, 75%.  $^1\text{H}$ -NMR (400 MHz,  $\text{CDCl}_3$ )  $\delta$ : 7.41 (dd,  $J = 1.7, 0.9$  Hz, 1H), 7.22 (d,  $J = 8.6$  Hz, 2H), 7.08 (d,  $J = 8.6$  Hz, 2H), 6.43–6.34 (m, 2H), 4.54 (d,  $J = 5.9$  Hz, 1H), 4.13 (dt,  $J = 8.3, 5.0$  Hz, 1H), 2.81–2.69 (m, 2H), 1.56 (s, 9H).  $^{13}\text{C}$ -NMR (100 MHz,  $\text{CDCl}_3$ )  $\delta$ : 153.1, 151.4, 149.1, 141.8, 134.7, 129.8, 120.7, 109.8, 107.4, 82.9, 73.5, 69.5, 38.1, 27.1. IR (KBr) 3388.3, 2981.9, 2925.9, 1749.3, 1506.1, 1373.9, 1266.0, 1145.5, 1014.0, 828.1, 743.4  $\text{cm}^{-1}$ ; HRMS ( $\text{CI}^+$ ) ( $m/z$ ) calcd. for  $\text{C}_{18}\text{H}_{22}\text{O}_6$  [ $\text{M}$ ] $^+$  334.1411; found 334.1425.

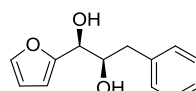

**1ac**: colorless oil, 0.28 g, 90.7%.  $^1\text{H}$ -NMR (400 MHz,  $\text{CDCl}_3$ )  $\delta$ : 7.71 (d,  $J = 8.3$  Hz, 2H), 7.43–7.28 (m, 3H), 7.14 (d,  $J = 8.5$  Hz, 2H), 6.90 (d,  $J = 8.5$  Hz, 2H), 6.44–6.32 (m, 2H), 4.51 (d,  $J = 5.9$  Hz, 1H), 4.12 (ddd,  $J = 7.9, 5.8, 4.7$  Hz, 1H), 2.81–2.63 (m, 2H), 2.45 (s, 3H).  $^{13}\text{C}$ -NMR (100 MHz,  $\text{CDCl}_3$ )  $\delta$ : 153.0, 147.6, 144.7, 141.8, 136.4, 131.8, 129.9, 129.1, 127.9, 121.7, 109.8, 107.4, 73.4, 69.6, 38.0, 21.1. IR (KBr) 3388.7, 2922.7, 1656.1, 1598.1, 1500.9, 1365.7, 1159.6, 1090.4, 1014.5, 863.9, 739.8  $\text{cm}^{-1}$ ; HRMS ( $\text{CI}^+$ ) ( $m/z$ ) calcd. for  $\text{C}_{20}\text{H}_{20}\text{O}_6\text{S}$  [ $\text{M}$ ] $^+$  388.0975; found 388.0979.

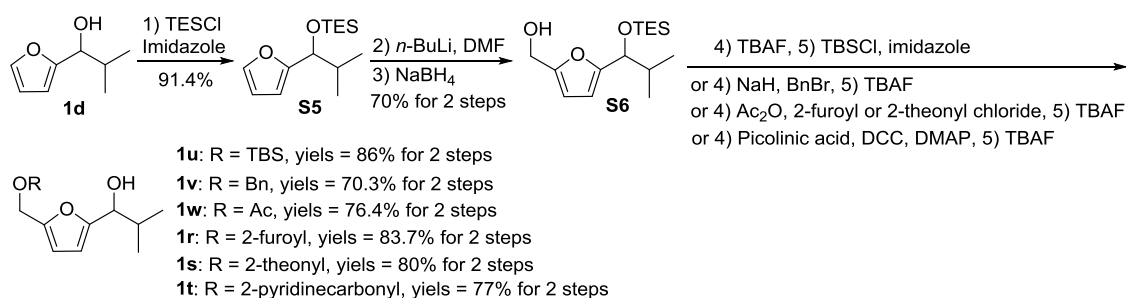

**General Procedure C**: To a stirred solution of the compound **1d**<sup>2</sup> (2.8 g, 20 mmol) in anhydrous DCM (100 mL) were added imidazole (2.04 g, 30 mmol) and TESCl (4.03 mL, 24 mmol) at 0 °C. After completion of the addition, the reaction mixture was allowed to warm to room temperature and stirred for 0.5 h. The reaction was quenched by addition of water (100 mL). The organic fractions were collected, and the aqueous phase was extracted with DCM (3  $\times$  50 mL). The combined organic fractions were washed with saturated aqueous  $\text{NH}_4\text{Cl}$  solution and brine, dried over  $\text{Na}_2\text{SO}_4$  filtered and concentrated under reduced pressure. The resulting residue was purified by flash column chromatography ( $\text{EtOAc}$ /hexane = 1:10) to give the silyl ether **S5**.

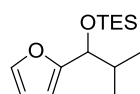

**S5**: colorless oil, 4.65 g, 91.4%.  $^1\text{H}$ -NMR (400 MHz,  $\text{CDCl}_3$ )  $\delta$ : 7.33–7.31 (m, 1H), 6.29 (dd,  $J = 3.2, 1.8$  Hz, 1H), 6.15 (d,  $J = 3.3$  Hz, 1H), 4.29 (d,  $J = 7.3$  Hz, 1H), 2.03 (dq,  $J = 13.7, 6.8$  Hz, 1H), 0.97 (d,  $J = 6.6$  Hz, 3H), 0.88 (t,  $J = 7.9$  Hz, 9H), 0.77 (d,  $J = 6.7$

Hz, 3H), 0.52 (q,  $J = 7.9$  Hz, 6H).  $^{13}\text{C}$ -NMR (100 MHz,  $\text{CDCl}_3$ )  $\delta$ : 156.9, 141.2, 110.0, 106.5, 74.1, 34.5, 18.9, 18.8, 6.9, 4.8.

To a stirred solution of the compound **S5** (1.53 g, 6 mmol) in anhydrous THF (12 mL) was added  $n\text{-BuLi}$  (2.5 M, 2.64 mL, 6.6 mmol) dropwise at  $-78^\circ\text{C}$ . After completion of the addition, the reaction mixture was allowed to warm to room temperature and stirred for 0.5 h. The reaction was then cooled to  $-78^\circ\text{C}$ , followed by the addition of DMF (0.93 mL, 12 mmol). After completion of the addition, the reaction mixture was allowed to warm to room temperature and stirred for 2.5 h. The reaction was quenched by addition of water (100 mL). The aqueous phase was extracted with EtOAc ( $3 \times 50$  mL). The combined organic fractions were washed with saturated aqueous  $\text{NH}_4\text{Cl}$  solution and brine, dried over  $\text{Na}_2\text{SO}_4$ , filtered and concentrated under reduced pressure. The crude protection product was used for the next step without further purification. To a stirred solution of the above residue in MeOH (30 mL) was added  $\text{NaBH}_4$  (0.45 g, 12 mmol) dropwise at  $0^\circ\text{C}$ . After completion of the addition, the reaction mixture was stirred for 0.5 h at the same temperature. The reaction was quenched by addition of water (150 mL), and the mixture was extracted with EtOAc ( $3 \times 50$  mL). The combined organic fractions were washed with brine, dried over  $\text{Na}_2\text{SO}_4$ , filtered and concentrated under reduced pressure. The resulting residue was purified by flash column chromatography (EtOAc/hexane = 1:2) to give the alcohol **S6**.

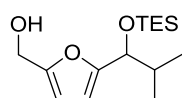

**S6**: colorless oil, 1.2 g, 70% for 2 steps.  $^1\text{H}$ -NMR (400 MHz,  $\text{CDCl}_3$ )  $\delta$ : 6.22 (d,  $J = 3.1$  Hz, 1H), 6.12 (d,  $J = 3.1$  Hz, 1H), 4.59 (s, 2H), 4.30 (d,  $J = 7.2$  Hz, 1H), 2.05 (dq,  $J = 13.7, 6.8$  Hz, 1H), 1.00 (d,  $J = 6.7$  Hz, 3H), 0.91 (t,  $J = 7.9$  Hz, 9H), 0.81 (d,  $J = 6.8$  Hz, 3H), 0.56 (q,  $J = 7.9$  Hz, 6H).  $^{13}\text{C}$ -NMR (100 MHz,  $\text{CDCl}_3$ )  $\delta$ : 157.1, 152.9, 108.3, 107.3, 74.2, 57.8, 34.4, 18.9, 18.7, 6.9, 4.8.

To a stirred solution of the compound **S6** (0.23 g, 0.8 mmol) in anhydrous THF (5 mL) was added TBAF (0.52 g, 2 mmol). After completion of the addition, the reaction mixture was allowed to warm to room temperature and stirred for 0.5 h. Then the mixture was concentrated and purified by flash column chromatography (EtOAc/hexane = 1:1) to give the crude residue. To a stirred solution of the above residue in anhydrous DCM (8 mL) were added imidazole (82 mg, 1.2 mmol) and TBSCl (0.14 g, 0.96 mmol) at  $0^\circ\text{C}$ . After completion of the addition, the reaction mixture was allowed to warm to room temperature and stirred for 0.5 h. The reaction was quenched by addition of water (50 mL). The organic fractions were collected, and the aqueous phase was extracted with DCM ( $3 \times 10$  mL). The combined organic fractions were washed with saturated aqueous  $\text{NH}_4\text{Cl}$  solution and brine, dried over  $\text{Na}_2\text{SO}_4$ , filtered and concentrated under reduced pressure. The resulting residue was purified by flash column chromatography (EtOAc/hexane = 1:5) to give the alcohol **1u**.

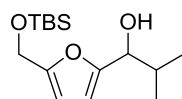

**1u**: colorless oil, 0.2 g, 86% for 2 steps.  $^1\text{H}$ -NMR (400 MHz,  $\text{CDCl}_3$ )  $\delta$ : 6.16 (q,  $J = 3.2$  Hz, 2H), 4.61 (s, 2H), 4.34 (d,  $J = 7.0$  Hz, 1H), 2.09 (dq,  $J = 13.6, 6.8$  Hz, 1H),

1.01 (d,  $J = 6.7$  Hz, 3H), 0.90 (s, 9H), 0.87 (d,  $J = 6.8$  Hz, 3H), 0.08 (s, 6H).  $^{13}\text{C}$ -NMR (100 MHz,  $\text{CDCl}_3$ )  $\delta$ : 155.9, 153.7, 107.9, 107.3, 73.8, 58.3, 33.4, 26.0, 18.9, 18.5, 18.3, -5.1. IR (KBr) 3390.2, 2944.3, 2864.8, 1464.0, 1374.7, 1252.3, 1072.6, 1014.3, 834.3, 776.8  $\text{cm}^{-1}$ ; HRMS ( $\text{CI}^+$ ) ( $m/z$ ) calcd. for  $\text{C}_{15}\text{H}_{27}\text{O}_3\text{Si}$  [ $\text{M}-\text{H}$ ] $^+$  283.1724; found 283.1722.

To a stirred solution of the compound **S6** (0.23 g, 0.8 mmol) in anhydrous DCM (5 mL) were added TEA (0.33 mL, 2.4 mmol), DMAP (9.8 mg, 0.08 mmol) and  $\text{Ac}_2\text{O}$ , 2-furoyl chloride or 2-theonyl chloride (1.2 mmol). After completion of the addition, the reaction mixture was stirred at room temperature for 0.5 h. The reaction was quenched by addition of water (50 mL). The organic fractions were collected, and the aqueous phase was extracted with DCM ( $3 \times 10$  mL). The combined organic fractions were washed with saturated aqueous  $\text{NH}_4\text{Cl}$  solution and brine, dried over  $\text{Na}_2\text{SO}_4$ , filtered and concentrated under reduced pressure. The crude protection product was used for the next step without further purification. To a stirred solution of the above residue in THF (10 mL) was added TBAF (0.42 g, 1.6 mmol). After completion of the addition, the reaction mixture was stirred for 2 h at room temperature. The reaction was quenched by addition of water (50 mL). The aqueous phase was extracted with EtOAc ( $3 \times 20$  mL). The combined organic fractions were washed with brine, dried over  $\text{Na}_2\text{SO}_4$ , filtered and concentrated under reduced pressure. The resulting residue was purified by flash column chromatography (EtOAc/hexane = 1:2) to give the alcohol **1w**, **1r** or **1s**.

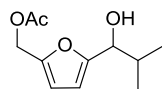

**1w**: colorless oil, 0.13 g, 76.4% for 2 steps.  $^1\text{H}$ -NMR (400 MHz,  $\text{CDCl}_3$ )  $\delta$ : 6.34 (d,  $J = 3.2$  Hz, 1H), 6.19 (d,  $J = 3.2$  Hz, 1H), 5.01 (s, 2H), 4.36 (d,  $J = 6.9$  Hz, 1H), 2.21–2.01 (m, 4H), 1.00 (d,  $J = 6.7$  Hz, 3H), 0.87 (d,  $J = 6.8$  Hz, 3H).  $^{13}\text{C}$ -NMR (100 MHz,  $\text{CDCl}_3$ )  $\delta$ : 170.8, 157.2, 148.7, 111.4, 107.5, 73.6, 58.3, 33.4, 21.0, 18.9, 18.2. IR (KBr) 3432.4, 2962.4, 2877.2, 1733.6, 1444.8, 1373.7, 1230.0, 1015.3, 794.5  $\text{cm}^{-1}$ ; HRMS ( $\text{CI}^+$ ) ( $m/z$ ) calcd. for  $\text{C}_{11}\text{H}_{16}\text{O}_4$  [ $\text{M}$ ] $^+$  212.1043; found 212.1051.

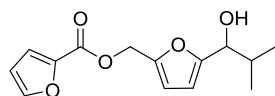

**1r**: colorless oil, 0.18 g, 83.7% for 2 steps.  $^1\text{H}$ -NMR (400 MHz,  $\text{CDCl}_3$ )  $\delta$ : 7.59 (s, 1H), 7.20 (d,  $J = 3.5$  Hz, 1H), 6.51 (dd,  $J = 3.6, 1.7$  Hz, 1H), 6.44 (d,  $J = 3.2$  Hz, 1H), 6.23 (d,  $J = 3.2$  Hz, 1H), 5.27 (s, 2H), 4.39 (d,  $J = 6.9$  Hz, 1H), 2.15–2.09 (m, 1H), 1.02 (d,  $J = 6.7$  Hz, 3H), 0.89 (d,  $J = 6.7$  Hz, 3H).  $^{13}\text{C}$ -NMR (100 MHz,  $\text{CDCl}_3$ )  $\delta$ : 158.3, 157.3, 148.2, 146.5, 144.3, 118.4, 111.9, 111.9, 107.5, 73.5, 58.4, 33.3, 18.7, 18.0. IR (KBr) 3433.2, 2963.6, 2877.5, 1717.4, 1575.6, 1472.0, 1392.0, 1294.5, 1175.8, 1112.4, 1017.9, 941.8, 763.0  $\text{cm}^{-1}$ ; HRMS ( $\text{CI}^+$ ) ( $m/z$ ) calcd. for  $\text{C}_{14}\text{H}_{16}\text{O}_5$  [ $\text{M}$ ] $^+$  264.0992; found 264.0992.

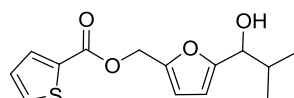

**1s**: colorless oil, 0.18 g, 80% for 2 steps.  $^1\text{H}$ -NMR (400 MHz,  $\text{CDCl}_3$ )  $\delta$ : 7.82 (d,  $J = 3.7$  Hz, 1H), 7.57 (d,  $J = 5.0$  Hz, 1H), 7.12–7.09 (m, 1H), 6.44 (d,  $J = 3.2$  Hz, 1H), 6.24 (d,  $J = 3.2$  Hz, 1H), 5.26 (s, 2H), 4.40 (d,  $J = 6.8$  Hz, 1H), 2.17–2.07 (m,

1H), 1.03 (d,  $J = 6.7$  Hz, 3H), 0.89 (d,  $J = 6.8$  Hz, 3H).  $^{13}\text{C}$ -NMR (100 MHz,  $\text{CDCl}_3$ )  $\delta$ : 161.9, 157.2, 148.4, 133.8, 133.4, 132.7, 127.8, 111.6, 107.5, 73.5, 58.7, 33.3, 18.7, 18.1. IR (KBr) 3473.4, 2964.3, 2876.4, 1705.5, 1523.9, 1417.9, 1369.0, 1266.0, 1083.2, 1022.2, 927.4, 753.3  $\text{cm}^{-1}$ ; HRMS ( $\text{CI}^+$ ) ( $m/z$ ) calcd. for  $\text{C}_{14}\text{H}_{16}\text{O}_4\text{S}$  [ $\text{M}$ ] $^+$  280.0764; found 280.0772.

To a stirred solution of the compound **S6** (0.23 g, 0.8 mmol) in anhydrous THF (5 mL) were added 60% NaH (64 mg, 1.6 mmol). After completion of the addition, the reaction mixture was stirred at 0 °C for 10 min. Then BnBr (0.19 mL, 1.6 mmol) was added, and the mixture was moved to 50 °C and stirred for 2 h. The reaction was poured into ice water and extracted with EtOAc ( $3 \times 20$  mL). The combined organic fractions were washed with saturated aqueous  $\text{NH}_4\text{Cl}$  solution and brine, dried over  $\text{Na}_2\text{SO}_4$ , filtered, and concentrated under reduced pressure. The crude protection product was used for the next step without further purification. To a stirred solution of the above residue in THF (10 mL) was added TBAF (0.42 g, 1.6 mmol). After completion of the addition, the reaction mixture was stirred for 2 h at room temperature. The reaction was quenched by addition of water (50 mL). The aqueous phase was extracted with EtOAc ( $3 \times 20$  mL). The combined organic fractions were washed with brine, dried over  $\text{Na}_2\text{SO}_4$ , filtered and concentrated under reduced pressure. The resulting residue was purified by flash column chromatography (EtOAc/hexane = 1:2) to give the alcohol **1v** (yield = 70.3% for two steps) as a colorless oil.

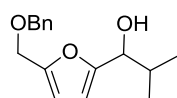

**1v**: colorless oil, 0.15 g, 70.3% for 2 steps.  $^1\text{H}$ -NMR (400 MHz,  $\text{CDCl}_3$ )  $\delta$ : 7.43–7.27 (m, 5H), 6.27 (d,  $J = 3.1$  Hz, 1H), 6.19 (d,  $J = 3.1$  Hz, 1H), 4.54 (s, 2H), 4.46 (s, 2H), 4.36 (d,  $J = 7.0$  Hz, 1H), 2.12 (dq,  $J = 13.5, 6.8$  Hz, 1H), 1.02 (d,  $J = 6.7$  Hz, 3H), 0.88 (d,  $J = 6.8$  Hz, 3H).  $^{13}\text{C}$ -NMR (100 MHz,  $\text{CDCl}_3$ )  $\delta$ : 156.0, 150.3, 137.3, 127.8, 127.3, 127.1, 109.5, 106.5, 72.9, 71.2, 63.3, 32.6, 18.2, 17.5. IR (KBr) 3393.1, 2961.1, 2866.9, 1633.6, 1556.0, 1458.0, 1359.4, 1200.3, 1059.4, 1014.0, 792.9, 739.4  $\text{cm}^{-1}$ ; HRMS ( $\text{CI}^+$ ) ( $m/z$ ) calcd. for  $\text{C}_{16}\text{H}_{20}\text{O}_3$  [ $\text{M}$ ] $^+$  260.1407; found 260.1405.

To a stirred solution of the compound **S6** (0.23 g, 0.8 mmol) in anhydrous DCM (5 mL) were added DCC (0.25 g, 1.2 mmol) and DMAP (0.15 g, 1.2 mmol). After completion of the addition, the reaction mixture was stirred at RT for 3 h. The reaction was quenched by addition of water (50 mL). The organic fractions were collected, and the aqueous phase was extracted with DCM ( $3 \times 20$  mL). The combined organic fractions were washed with saturated aqueous  $\text{NH}_4\text{Cl}$  solution and brine, dried over  $\text{Na}_2\text{SO}_4$ , filtered and concentrated under reduced pressure. The crude protection product was used for the next step without further purification. To a stirred solution of the above residue in THF (10 mL) was added TBAF (0.42 g, 1.6 mmol). After completion of the addition, the reaction mixture was stirred for 2 h at room temperature. The reaction was quenched by addition of water (50 mL). The aqueous phase was extracted with EtOAc ( $3 \times 20$  mL). The combined organic fractions were washed with brine, dried over  $\text{Na}_2\text{SO}_4$ , filtered, and concentrated under reduced pressure. The resulting residue was purified by flash column chromatography (EtOAc/hexane = 1:2) to give the alcohol **1t** (yield = 77% for two steps) as a colorless oil.

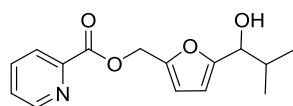

**1t**: colorless oil, 0.17 g, 77% for 2 steps.  $^1\text{H-NMR}$  (400 MHz,  $\text{CDCl}_3$ )  $\delta$ : 8.74 (s, 1H), 8.12 (d,  $J = 7.9\text{ Hz}$ , 1H), 7.82 (t,  $J = 7.8\text{ Hz}$ , 1H), 7.49–7.45 (m, 1H), 6.46 (d,  $J = 2.8\text{ Hz}$ , 1H), 6.21 (t,  $J = 2.6\text{ Hz}$ , 1H), 5.36 (s, 2H), 4.36 (d,  $J = 6.8\text{ Hz}$ , 1H), 2.14–2.05 (m, 1H), 1.00 (d,  $J = 6.7\text{ Hz}$ , 3H), 0.87 (d,  $J = 6.8\text{ Hz}$ , 3H).  $^{13}\text{C-NMR}$  (100 MHz,  $\text{CDCl}_3$ )  $\delta$ : 164.1, 156.7, 149.3, 147.5, 147.2, 136.4, 126.4, 124.7, 111.5, 106.8, 72.8, 58.7, 32.6, 18.1, 17.4. IR (KBr) 3373.8, 2963.2, 2874.3, 1728.3, 1581.8, 1439.8, 1373.6, 1291.5, 1125.6, 1018.8, 929.9, 749.6  $\text{cm}^{-1}$ ; HRMS ( $\text{CI}^+$ ) ( $m/z$ ) calcd. for  $\text{C}_{15}\text{H}_{17}\text{NO}_4$  [ $\text{M}$ ] $^+$  275.1152; found 275.1146.

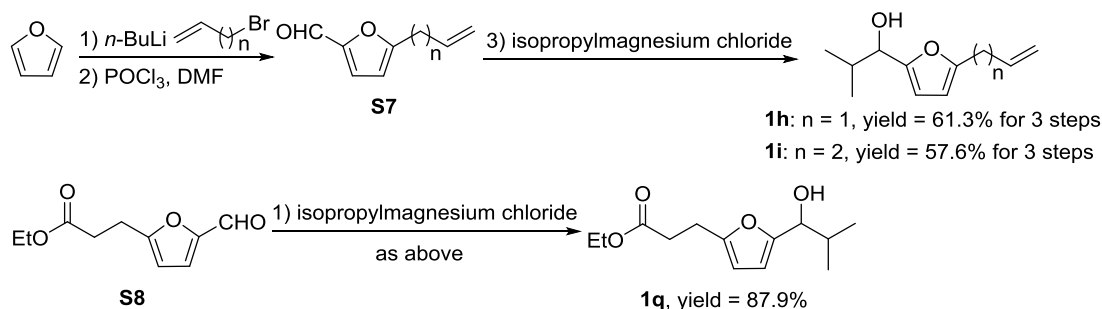

**General Procedure D:** To a stirred solution of the furan (2.18 mL, 30 mmol) in anhydrous THF (30 mL) was added  $n\text{-BuLi}$  (2.5 M, 13.2 mL, 33 mmol) dropwise at 0 °C. After completion of the addition, the reaction mixture was allowed to stir at 0 °C for 0.5 h. To the above mixture was added allyl bromide or 4-bromo-1-butene (39 mmol). After the addition, the reaction was moved to RT and stirred for 2.5 h (for allyl bromide) or 16 h (for 4-Bromo-1-butene). The mixture was quenched by addition of water (200 mL). The aqueous phase was extracted with EtOAc ( $3 \times 50\text{ mL}$ ). The combined organic fractions were washed with saturated aqueous  $\text{NH}_4\text{Cl}$  solution and brine, dried over  $\text{Na}_2\text{SO}_4$ , filtered and concentrated under reduced pressure. The residue was used for the next step without further purification. To a stirred solution of DMF (2.79 mL, 36 mmol) in dry DCM (20 mL) was added  $\text{POCl}_3$  (3.4 mL, 36 mmol) dropwise at 0 °C. After completion of the addition, the mixture was stirred at 0 °C for 0.5 h. The above residue was added slowly to the mixture, and the reaction was stirred at 0 °C for 0.5 h. The reaction was quenched by addition of saturated  $\text{Na}_2\text{CO}_3$  solution. The organic fractions were collected, and the aqueous phase was extracted with DCM ( $3 \times 50\text{ mL}$ ). The combined organic fractions were washed with brine, dried over  $\text{Na}_2\text{SO}_4$ , filtered and concentrated under reduced pressure. To a stirred solution of the above residue in anhydrous THF (100 mL) was added isopropylmagnesium chloride (30 mL, 2 M in THF, 60 mmol) dropwise at 0 °C. After completion of the addition, the reaction mixture was allowed to stir at 0 °C for 0.5 h. The reaction was quenched by addition of water (500 mL). The aqueous phase was extracted with EtOAc ( $3 \times 100\text{ mL}$ ). The combined organic fractions were washed with saturated aqueous  $\text{NH}_4\text{Cl}$  solution and brine, dried over  $\text{Na}_2\text{SO}_4$ , filtered and concentrated under reduced pressure. The resulting residue was purified by flash column chromatography (EtOAc/hexane = 1:3) to give the alcohol **1h** (yield = 61.3% for 3 steps) or or **1i** (yield = 57.6% for 3 steps) as a colorless oil.

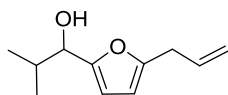

**1h**: colorless oil, 3.31 g, 61.3% for 3 steps.  $^1\text{H-NMR}$  (400 MHz,  $\text{CDCl}_3$ )  $\delta$ : 6.12 (d,  $J = 3.1$  Hz, 1H), 5.97–5.87 (m, 2H), 5.15–5.09 (m, 2H), 4.30 (d,  $J = 7.2$  Hz, 1H), 3.37 (dq,  $J = 6.5, 1.3$  Hz, 2H), 2.09 (dq,  $J = 13.6, 6.8$  Hz, 1H), 1.02 (d,  $J = 6.7$  Hz, 3H), 0.86 (d,  $J = 6.8$  Hz, 3H).  $^{13}\text{C-NMR}$  (100 MHz,  $\text{CDCl}_3$ )  $\delta$ : 154.9, 153.3, 134.0, 117.0, 107.4, 106.1, 73.7, 33.4, 32.7, 19.0, 18.4. IR (KBr) 3427.9, 2965.6, 2877.7, 1641.6, 1558.4, 1463.7, 1377.9, 1266.1, 1176.7, 1007.4, 919.0, 737.0  $\text{cm}^{-1}$ ; HRMS ( $\text{CI}^+$ ) ( $m/z$ ) calcd. for  $\text{C}_{11}\text{H}_{16}\text{O}_2$   $[\text{M}]^+$  180.1145; found 180.1152.

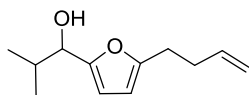

**1i**: colorless oil, 3.36 g, 57.6% for 3 steps.  $^1\text{H-NMR}$  (400 MHz,  $\text{CDCl}_3$ )  $\delta$ : 6.10 (d,  $J = 3.1$  Hz, 1H), 5.93 (d,  $J = 3.2$  Hz, 1H), 5.88–5.78 (m, 1H), 5.09–4.95 (m, 2H), 4.29 (d,  $J = 7.2$  Hz, 1H), 2.67 (t,  $J = 8$  Hz, 2H), 2.38 (dt,  $J = 8.7, 7.3, 1.5$  Hz, 2H), 2.09 (dq,  $J = 13.9, 6.9$  Hz, 1H), 1.82 (brs, 1H), 1.02 (d,  $J = 6.7$  Hz, 3H), 0.85 (d,  $J = 6.8$  Hz, 3H).  $^{13}\text{C-NMR}$  (100 MHz,  $\text{CDCl}_3$ )  $\delta$ : 155.0, 154.4, 137.6, 115.4, 107.2, 105.5, 73.8, 33.4, 32.2, 27.7, 18.9, 18.5. IR (KBr) 3385.7, 2961.0, 2920.2, 2876.4, 1641.9, 1561.0, 1455.2, 1378.4, 1009.0, 913.9, 776.8  $\text{cm}^{-1}$ ; HRMS ( $\text{CI}^+$ ) ( $m/z$ ) calcd. for  $\text{C}_{12}\text{H}_{18}\text{O}_2$   $[\text{M}]^+$  194.1301; found 194.1304.

Substrate **1q** was synthesized from **S8**<sup>11</sup> (0.33 g, 1.68 mmol), and the detailed procedures were described as above.

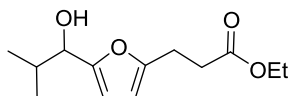

**1q**: colorless oil, 0.35 g, 87.9%.  $^1\text{H-NMR}$  (400 MHz,  $\text{CDCl}_3$ )  $\delta$ : 6.09 (d,  $J = 3.1$  Hz, 1H), 5.94 (d,  $J = 3.1$  Hz, 1H), 4.28 (dd,  $J = 7.2, 4.2$  Hz, 1H), 4.13 (q,  $J = 7.1$  Hz, 2H), 2.95–2.91 (m, 2H), 2.64–2.60 (m, 2H), 2.10–2.02 (m, 1H), 1.24 (t,  $J = 7.2$  Hz, 3H), 1.00 (d,  $J = 6.7$  Hz, 3H), 0.83 (d,  $J = 6.8$  Hz, 3H).  $^{13}\text{C-NMR}$  (100 MHz,  $\text{CDCl}_3$ )  $\delta$ : 172.6, 154.9, 153.5, 107.3, 105.9, 73.7, 60.7, 33.4, 32.9, 23.7, 18.9, 18.5, 14.3. IR (KBr) 3464.4, 2969.7, 1728.3, 1376.5, 1265.1, 1186.0, 1019.2, 741.8  $\text{cm}^{-1}$ ; HRMS ( $\text{CI}^+$ ) ( $m/z$ ) calcd. for  $\text{C}_{13}\text{H}_{20}\text{O}_4$   $[\text{M}]^+$  240.1356; found 240.1365.

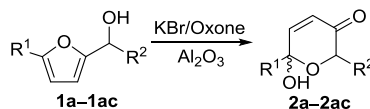

**General Procedure E:** Aluminium oxide 90 active neutral (Merck, 0.063–0.200 mm) was equilibrated at 120 °C for 48 h, then it was cooled to RT under nitrogen. To a 5-mL round-bottomed flask was added a magnetic stirrer, a liquid furyl alcohol (0.2 mmol) and the above activated aluminium oxide (120 mg). The resulting mixture was stirred until uniformly free-flowing. To the above mixture was added  $\text{H}_2\text{O}$  (7.2 mg, 0.4 mmol) and KBr (2.38 mg, 0.02 mmol), and the mixture was stirred again to be free-flowing. To the above mixture was added  $\text{NaHCO}_3$  (16.8 mg, 0.2 mmol) and Oxone (123 mg, 0.2 mmol), the mixture was stirred vigorously for 5 min at RT. Then the solid was transferred into a glass column and eluted by EtOAc to get a crude product. A very pure product for NMR was got by silica gel column chromatography.



**Notes:** KBr, NaHCO<sub>3</sub> and Oxone were all ground to be fine powder before use. For substrate **1f–g**, **1h–i** and **1l**, another KBr (7.14 mg, 0.06 mmol), H<sub>2</sub>O (21.6 mg, 1.2 mmol), aluminium oxide (120 mg), Oxone (123 mg, 0.2 mmol) and NaHCO<sub>3</sub> (16.8 mg, 0.2 mmol) were needed.

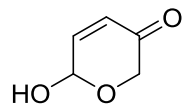

**2a** (EtOAc/hexane = 1:2): colorless oil, 20.8 mg, 91%. <sup>1</sup>H-NMR (400 MHz, CDCl<sub>3</sub>) δ: 6.95 (dd, *J* = 10.4, 3.0 Hz, 1H), 6.16 (d, *J* = 10.4 Hz, 1H), 5.63 (dd, *J* = 5.6, 3.0 Hz, 1H), 4.57 (d, *J* = 16.9 Hz, 1H), 4.14 (d, *J* = 17.0 Hz, 1H), 3.41 (d, *J* = 5.4 Hz, 1H). <sup>13</sup>C-NMR (100 MHz, CDCl<sub>3</sub>) δ: 194.7, 145.8, 128.1, 88.4, 66.8.

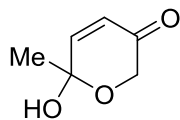

**2b** (EtOAc/hexane = 1:3): colorless oil, 16.9 mg, 66%. <sup>1</sup>H-NMR (400 MHz, DMSO) δ: 7.03 (d, *J* = 10.3 Hz, 1H), 6.66 (s, 1H), 5.97 (d, *J* = 10.2 Hz, 1H), 4.39 (d, *J* = 16.9 Hz, 1H), 3.99 (dd, *J* = 17.0 Hz, 1H), 1.46 (s, 3H). <sup>13</sup>C-NMR (100 MHz, DMSO) δ: 195.9, 152.1, 125.3, 92.4, 66.2, 27.6.

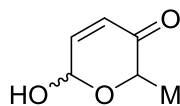

**2c** (EtOAc/hexane = 1:3): colorless oil (dr 7:3), 22.6 mg, 88%. <sup>1</sup>H-NMR (400 MHz, CDCl<sub>3</sub>) δ: 7.09–6.74 (m, 1H), 6.14–6.18 (m, *J* = 20.2, 10.3 Hz, 1H), 5.83–5.58 (m, 1H), 4.73 (q, *J* = 6.8 Hz, 0.7 H), 4.25 (q, *J* = 6.7 Hz, 0.3 H), 1.44–1.48 (m, 3H). <sup>13</sup>C-NMR (100 MHz, CDCl<sub>3</sub>) δ: 197.0, 196.5, 148.1, 144.5, 128.5, 127.23, 91.0, 87.7, 75.2, 70.4, 16.2, 15.3.

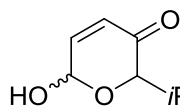

**2d** (EtOAc/hexane = 1:3): colorless oil (dr 7:3), 28.7 mg, 92%. <sup>1</sup>H-NMR (400 MHz, CDCl<sub>3</sub>) δ: 7.01–6.84 (m, 1H), 6.15–6.08 (m, 1H), 5.68–5.63 (m, 1H), 4.40 (d, *J* = 3.1 Hz, 0.75H), 3.90 (dd, *J* = 3.4, 1.4 Hz, 0.25H), 3.81–3.62 (m, 0.25H), 3.41 (d, *J* = 4.7 Hz, 0.75H), 2.58–2.30 (m, 1H), 1.05–1.01 (m, 3H), 0.93–0.86 (m, 3H). <sup>13</sup>C-NMR (100 MHz, CDCl<sub>3</sub>) δ: 196.9, 196.4, 148.3, 144.5, 129.6, 128.2, 91.4, 87.7, 83.2, 78.5, 28.9, 28.7, 19.2, 19.1, 16.6, 16.3.

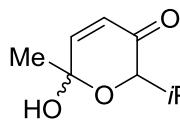

**2e** (EtOAc/hexane = 1:3): colorless oil (dr 9:1), 26.6 mg, 78%. <sup>1</sup>H-NMR (400 MHz, DMSO) δ: 6.98 (d, *J* = 10.1 Hz, 1H), 6.53 (s, 1H), 5.91 (d, *J* = 10.1 Hz, 1H), 4.24 (d, *J* = 2.8 Hz, 0.9H), 3.97 (d, *J* = 4.1 Hz, 0.1H), 2.31–2.24 (m, 1H), 1.46 (s, 3H), 0.96 (d, *J* = 7.0 Hz, 3H), 0.77 (d, *J* = 6.8 Hz, 3H). <sup>13</sup>C-NMR (100 MHz, DMSO) δ: 197.7, 151.4, 125.7, 92.2, 77.7, 28.7, 28.3, 19.4, 16.6.

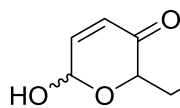

**2f** (EtOAc/hexane = 1:3): colorless oil (dr 7:3), 26.2 mg, 85%. <sup>1</sup>H-NMR (400 MHz, CDCl<sub>3</sub>) δ: 7.00–6.85 (m, 1H), 6.18–6.13 (dd, *J* = 18.3, 10.3 Hz, 1H), 5.91–5.78 (m,

1H), 5.67–5.66 (m, 1H), 5.20–5.09 (m, 2H), 4.67 (dd,  $J = 8.0, 3.8$  Hz, 0.7H), 4.17 (ddd,  $J = 8.3, 4.0, 1.2$  Hz, 0.3H), 2.77–2.70 (m, 1H), 2.60–2.45 (m, 1H).  $^{13}\text{C}$ -NMR (100 MHz,  $\text{CDCl}_3$ )  $\delta$ : 195.9, 195.5, 147.9, 144.5, 133.8, 133.7, 128.7, 127.7, 118.1, 117.9, 90.9, 87.9, 78.6, 73.8, 35.2, 34.2.

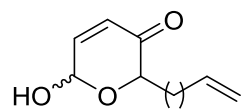

**2g** (EtOAc/hexane = 1:3): colorless oil (dr 7:3), 27.7 mg, 76%.  $^1\text{H}$ -NMR (400 MHz,  $\text{CDCl}_3$ )  $\delta$ : 6.94–6.87 (m, 1H), 6.16–6.09 (m, 1H), 5.85–5.75 (m, 1H), 5.65–5.64 (m, 1H), 5.04–4.94 (m, 2H), 4.57 (dd,  $J = 8.0, 3.9$  Hz, 0.7H), 4.08 (ddd,  $J = 8.3, 4.0, 1.2$  Hz, 0.3H), 2.16–2.01 (m, 2H), 1.99–1.90 (m, 1H), 1.80–1.67 (m, 1H), 1.58–1.49 (m, 2H).  $^{13}\text{C}$ -NMR (100 MHz,  $\text{CDCl}_3$ )  $\delta$ : 196.6, 196.3, 147.8, 144.4, 138.5, 138.4, 128.9, 127.8, 114.99, 114.95, 91.0, 87.8, 78.9, 74.1, 33.6, 30.2, 29.2, 24.5, 24.4.

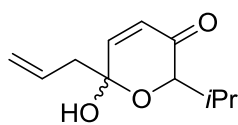

**2h** (EtOAc/hexane = 1:3): colorless oil (dr 9:1), 33 mg, 84%.  $^1\text{H}$ -NMR (400 MHz,  $\text{CDCl}_3$ )  $\delta$ : 6.77 (d,  $J = 10.1$  Hz, 1H), 6.05 (d,  $J = 10.3$  Hz, 1H), 5.96–5.87 (m, 1H), 5.31–5.23 (m, 2H), 4.35 (d,  $J = 2.8$  Hz, 1H), 2.69 (ddt,  $J = 13.6, 6.2, 1.3$  Hz, 1H), 2.53–2.41 (m, 2H), 1.03 (d,  $J = 6.9$  Hz, 3H), 0.85 (d,  $J = 6.8$  Hz, 3H).  $^{13}\text{C}$ -NMR (100 MHz,  $\text{CDCl}_3$ )  $\delta$ : 197.1, 147.3, 131.2, 128.1, 121.2, 93.0, 78.4, 46.0, 28.8, 19.2, 16.2.

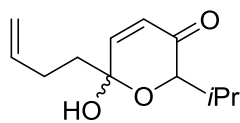

**2i** (EtOAc/hexane = 1:3): colorless oil (dr 9:1), 30.7 mg, 73%.  $^1\text{H}$ -NMR (400 MHz, DMSO)  $\delta$ : 7.00 (d,  $J = 10.2$  Hz, 1H), 5.97 (d,  $J = 10.2$  Hz, 1H), 5.91–5.77 (m, 1H), 5.10–4.90 (m, 2H), 4.25 (d,  $J = 2.7$  Hz, 1H), 2.34–2.25 (m, 1H), 2.22–1.99 (m, 2H), 1.84–1.77 (m, 2H), 0.97 (d,  $J = 7.0$  Hz, 3H), 0.77 (d,  $J = 6.8$  Hz, 3H).  $^{13}\text{C}$ -NMR (100 MHz, DMSO)  $\delta$ : 197.64, 150.65, 138.83, 126.66, 115.08, 93.37, 77.63, 28.87, 28.17, 19.44, 16.63.

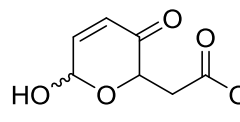

**2j** (EtOAc/hexane = 1:3): colorless oil (dr 7:3), 33.6 mg, 84%.  $^1\text{H}$ -NMR (400 MHz,  $\text{CDCl}_3$ )  $\delta$ : 7.02–6.88 (m, 1H), 6.20–6.13 (m, 1H), 5.72–5.62 (m, 1H), 5.02 (dd,  $J = 7.6, 3.8$  Hz, 0.7H), 4.57 (dd,  $J = 7.9, 3.9$  Hz, 0.3H), 4.19–4.13 (m, 2H), 3.03–2.97 (m, 1H), 2.83–2.71 (m, 1H), 1.28–1.24 (m, 3H).  $^{13}\text{C}$ -NMR (100 MHz,  $\text{CDCl}_3$ )  $\delta$ : 195.0, 194.6, 171.1, 148.4, 144.7, 128.5, 127.2, 91.0, 87.8, 75.4, 70.9, 61.3, 61.2, 36.2, 35.4, 14.2.

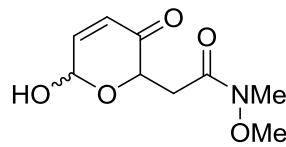

**2k** (EtOAc/hexane = 1:3): colorless oil (dr 7:3), 34.4 mg, 80%.  $^1\text{H}$ -NMR (400 MHz,  $\text{CDCl}_3$ )  $\delta$ : 6.98–6.90 (m, 1H), 6.20–6.14 (m, 1H), 5.71–5.61 (m, 1H), 5.12 (dd,  $J = 8.2, 3.4$  Hz, 0.7H), 4.65 (ddd,  $J = 7.5, 3.8, 1.1$  Hz, 0.3H), 3.704–3.700 (m, 3H), 3.19 (s, 3H), 3.14–2.86 (m, 2H).  $^{13}\text{C}$ -NMR (100 MHz,  $\text{CDCl}_3$ )  $\delta$ : 196.0, 195.4, 171.3, 148.5, 144.9, 128.2, 127.2, 90.7, 87.9, 75.1, 70.6, 61.5, 34.2, 33.0, 32.3.

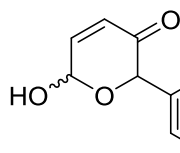

**2l** (EtOAc/hexane = 1:3): colorless oil (dr 7:3), 27.7 mg, 63%.

$^1\text{H-NMR}$  (400 MHz,  $\text{CDCl}_3$ )  $\delta$ : 7.33–7.27 (m, 2H), 7.05–7.00 (m, 1H), 6.95–6.92 (m, 2H), 6.32–6.23 (m, 1H), 5.83–5.75 (m, 1H), 5.57 (s, 0.75H), 5.09 (s, 0.25H), 3.83 (s, 3H).  $^{13}\text{C-NMR}$  (100 MHz,  $\text{CDCl}_3$ )  $\delta$ : 194.8, 159.8, 148.0, 144.6, 129.4, 129.3, 127.9, 127.4, 114.0, 91.5, 88.1, 80.8, 55.3.

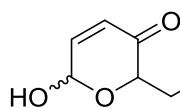

**2m** (EtOAc/hexane = 1:3): colorless oil (dr 7:3), 44.1 mg, 91%.

$^1\text{H-NMR}$  (400 MHz,  $\text{CDCl}_3$ )  $\delta$ : 7.00–6.91 (m, 1H), 6.21–6.13 (m, 1H), 5.73–5.61 (m, 1H), 5.10 (dd,  $J = 7.6, 3.8$  Hz, 0.7H), 4.66 (dd,  $J = 7.8, 3.8$  Hz, 0.3H), 4.21 (q,  $J = 7.1$  Hz, 2H), 3.55–3.54 (m, 2H), 3.27–3.20 (m, 1H), 2.99–2.92 (m, 1H), 1.30 (t,  $J = 7.1$  Hz, 3H).  $^{13}\text{C-NMR}$  (100 MHz,  $\text{CDCl}_3$ )  $\delta$ : 199.9, 199.8, 195.2, 194.7, 167.0, 148.5, 144.7, 128.3, 127.0, 91.0, 87.8, 74.5, 70.0, 65.6, 61.6, 49.8, 49.7, 43.7, 43.0, 14.1. IR (KBr) 3426.0, 2983.7, 2931.0, 1694.8, 1631.6, 1371.8, 1264.3, 1149.7, 1087.1, 1019.1, 936.2, 755.7  $\text{cm}^{-1}$ ; HRMS ( $\text{CI}^+$ ) ( $m/z$ ) calcd. for  $\text{C}_{11}\text{H}_{15}\text{O}_6$  [ $\text{M}+\text{H}$ ] $^+$  243.0863; found 243.0866.

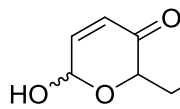

**2n** (EtOAc/hexane = 3:1): colorless oil (dr 7:3), 46 mg, 97%.

$^1\text{H-NMR}$  (400 MHz, DMSO)  $\delta$ : 7.48–7.47 (m, 2H), 7.34–7.02 (m, 2H), 6.12–6.03 (m, 1H), 5.61–5.48 (m, 1H), 4.60 (dd,  $J = 8.3, 4.1$  Hz, 0.7H), 4.28 (ddd,  $J = 8.8, 4.0, 1.3$  Hz, 0.3H), 4.20–4.11 (m, 2H), 2.27–2.20 (m, 1H), 1.97–1.86 (m, 1H).  $^{13}\text{C-NMR}$  (100 MHz, DMSO)  $\delta$ : 196.7, 196.5, 151.9, 148.3, 127.7, 126.0, 90.9, 87.2, 74.6, 70.1, 65.8, 65.8, 30.3, 29.6. IR (KBr) 3370.4, 2987.0, 1689.5, 1364.3, 1268.0, 1178.4, 1023.3, 928.3, 755.1  $\text{cm}^{-1}$ ; HRMS ( $\text{CI}^+$ ) ( $m/z$ ) calcd. for  $\text{C}_7\text{H}_{11}\text{NO}_6\text{S}$  [ $\text{M}$ ] $^+$  237.0302; found 237.0315.

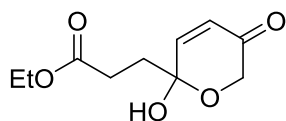

**2o** (EtOAc/hexane = 1:3): colorless oil, 33.8 mg, 79%.  $^1\text{H-NMR}$  (400

MHz,  $\text{CDCl}_3$ )  $\delta$ : 6.82 (d,  $J = 10.3$  Hz, 1H), 6.05 (d,  $J = 10.3$  Hz, 1H), 5.18 (s, 1H), 4.60 (d,  $J = 16.8$  Hz, 1H), 4.17 (q,  $J = 7.1$  Hz, 2H), 4.08 (d,  $J = 16.8$  Hz, 1H), 2.82 (ddd,  $J = 17.6, 9.4, 5.3$  Hz, 1H), 2.50 (ddd,  $J = 17.6, 6.5, 4.8$  Hz, 1H), 2.23–2.04 (m, 2H), 1.27 (t,  $J = 7.1$  Hz, 3H).  $^{13}\text{C-NMR}$  (100 MHz,  $\text{CDCl}_3$ )  $\delta$ : 195.3, 175.6, 148.7, 126.4, 92.6, 66.6, 61.6, 34.7, 28.4, 14.2. IR (KBr) 3425.5, 2982.3, 1698.4, 1378.0, 1272.0, 1184.7, 1082.3, 944.9, 867.2, 785.9  $\text{cm}^{-1}$ ; HRMS ( $\text{CI}^+$ ) ( $m/z$ ) calcd. for  $\text{C}_{10}\text{H}_{13}\text{O}_5$  [ $\text{M}-\text{H}$ ] $^+$  213.0757; found 213.0768.

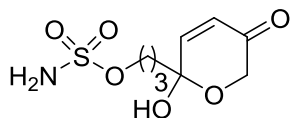

**2p** (EtOAc/hexane = 1:1): colorless oil, 46.7 mg, 93%.  $^1\text{H-NMR}$

(400 MHz, DMSO)  $\delta$ : 7.42 (s, 2H), 7.05 (d,  $J$  = 10.3 Hz, 1H), 6.74 (s, 1H), 6.04 (d,  $J$  = 10.3 Hz, 1H), 4.43 (d,  $J$  = 17.0 Hz, 1H), 4.12–3.92 (m, 3H), 1.91–1.64 (m, 4H).  $^{13}\text{C-NMR}$  (100 MHz, DMSO)  $\delta$ : 195.8, 151.1, 126.2, 93.6, 69.5, 66.3, 36.4, 23.5. IR (KBr) 3346.1, 2978.5, 1688.0, 1361.1, 1268.3, 1177.9, 971.1, 755.4  $\text{cm}^{-1}$ ; HRMS ( $\text{CI}^+$ ) ( $m/z$ ) calcd. for  $\text{C}_8\text{H}_{13}\text{NO}_6\text{S}$   $[\text{M}]^+$  251.0458; found 251.0469.

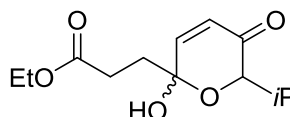

**2q** (EtOAc/hexane = 1:3): colorless oil (dr 9:1), 46.1 mg, 90%.

$^1\text{H-NMR}$  (400 MHz,  $\text{CDCl}_3$ )  $\delta$ : 6.78 (d,  $J$  = 10.1 Hz, 1H), 6.01 (d,  $J$  = 10.1 Hz, 1H), 4.40 (d,  $J$  = 2.8 Hz, 1H), 4.18 (q,  $J$  = 7.2 Hz, 2H), 2.90–2.80 (m, 1H), 2.57–2.40 (m, 2H), 2.29–2.08 (m, 2H), 1.28 (t,  $J$  = 7.1 Hz, 3H), 1.02 (d,  $J$  = 7.0 Hz, 3H), 0.84 (d,  $J$  = 6.8 Hz, 3H).  $^{13}\text{C-NMR}$  (100 MHz,  $\text{CDCl}_3$ )  $\delta$ : 197.1, 175.3, 147.8, 127.2, 92.5, 78.3, 61.4, 35.5, 28.7, 28.6, 19.2, 16.2, 14.2. IR (KBr) 3427.2, 2971.6, 2936.3, 2876.0, 1691.4, 1458.4, 1376.5, 1269.1, 1182.4, 1037.4, 755.6  $\text{cm}^{-1}$ ; HRMS ( $\text{CI}^+$ ) ( $m/z$ ) calcd. for  $\text{C}_{13}\text{H}_{21}\text{O}_5$   $[\text{M}+\text{H}]^+$  257.1384; found 257.1391.

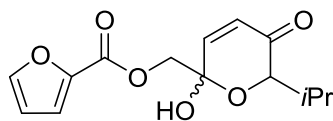

**2r** (EtOAc/hexane = 1:2): colorless oil (dr 9:1), 52.1 mg, 93%.

$^1\text{H-NMR}$  (400 MHz,  $\text{CDCl}_3$ )  $\delta$ : 7.64 (s, 1H), 7.28–7.23 (m, 1H), 7.03–6.87 (m, 1H), 6.56 (dd,  $J$  = 3.6, 1.7 Hz, 1H), 6.22–6.15 (m, 1H), 4.80–4.67 (m, 1H), 4.49–4.16 (m, 2H), 2.53–2.42 (m, 1H), 1.04 (d,  $J$  = 6.9 Hz, 3H), 0.85 (d,  $J$  = 6.8 Hz, 3H).  $^{13}\text{C-NMR}$  (100 MHz,  $\text{CDCl}_3$ )  $\delta$ : 196.3, 158.5, 147.1, 144.0, 143.8, 128.7, 119.1, 112.1, 92.2, 78.6, 68.1, 28.8, 18.9, 15.9. IR (KBr) 3405.2, 2967.7, 2876.2, 1692.0, 1576.3, 1470.5, 1393.9, 1297.4, 1177.8, 1114.8, 1068.9, 929.8, 760.7  $\text{cm}^{-1}$ ; HRMS ( $\text{CI}^+$ ) ( $m/z$ ) calcd. for  $\text{C}_{14}\text{H}_{17}\text{O}_6$   $[\text{M}+\text{H}]^+$  281.1020; found 281.1021.

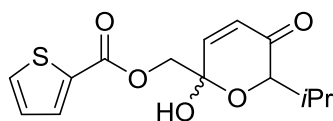

**2s** (EtOAc/hexane = 1:2): colorless oil (dr 9:1), 55.7 mg, 94%.

$^1\text{H-NMR}$  (400 MHz,  $\text{CDCl}_3$ )  $\delta$ : 7.88–7.84 (m, 1H), 7.64–7.62 (m, 1H), 7.17–7.14 (m, 1H), 6.99–6.89 (m, 1H), 6.23–6.16 (m, 1H), 4.77–4.67 (m, 1H), 4.45–4.21 (m, 2H), 2.52–2.41 (m, 1H), 1.05 (d,  $J$  = 7.0 Hz, 3H), 0.86 (d,  $J$  = 6.8 Hz, 3H).  $^{13}\text{C-NMR}$  (100 MHz,  $\text{CDCl}_3$ )  $\delta$ : 196.3, 162.3, 144.0, 134.4, 133.4, 132.5, 129.3, 128.7, 128.0, 93.5, 92.3, 82.8, 78.6, 68.4, 28.8, 18.9, 18.8, 16.9, 15.9. IR (KBr) 3401.3, 2966.6, 2876.1, 1687.9, 1524.0, 1415.3, 1367.4, 1265.2, 1078.5, 928.2, 748.0  $\text{cm}^{-1}$ ; HRMS ( $\text{CI}^+$ ) ( $m/z$ ) calcd. for  $\text{C}_{14}\text{H}_{17}\text{O}_5\text{S}$   $[\text{M}+\text{H}]^+$  297.0791; found 297.0796.

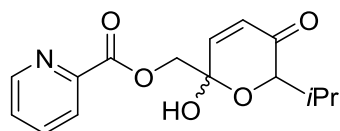

**2t** (EtOAc/hexane = 1:1): colorless oil (dr 9:1), 50.7 mg, 87%.

$^1\text{H-NMR}$  (400 MHz,  $\text{CDCl}_3$ )  $\delta$ : 8.80 (d,  $J = 4.8$  Hz, 1H), 8.20 (d,  $J = 7.9$  Hz, 1H), 7.93 (d,  $J = 7.7$  Hz, 1H), 7.58 (dd,  $J = 7.7, 4.6$  Hz, 1H), 7.01 (d,  $J = 10.3$  Hz, 1H), 6.16 (d,  $J = 10.1$  Hz, 1H), 4.78 (d,  $J = 11.4$  Hz, 1H), 4.46–4.32 (m, 2H), 2.47–2.42 (m, 1H), 0.99 (d,  $J = 7.0$  Hz, 3H), 0.83 (d,  $J = 6.7$  Hz, 3H).  $^{13}\text{C-NMR}$  (100 MHz,  $\text{CDCl}_3$ )  $\delta$ : 196.4, 164.6, 149.6, 147.1, 144.3, 137.7, 128.6, 127.6, 125.7, 92.1, 78.5, 69.2, 28.7, 19.0, 15.9. IR (KBr) 3290.8, 2968.0, 2876.1, 1734.8, 1689.0, 1441.9, 1372.0, 1294.4, 1244.7, 1128.3, 1046.3, 753.3  $\text{cm}^{-1}$ ; HRMS ( $\text{CI}^+$ ) ( $m/z$ ) calcd. for  $\text{C}_{15}\text{H}_{18}\text{NO}_5$  [ $\text{M}+\text{H}$ ] $^+$  292.1179; found 292.1190.

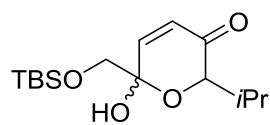

**2u** (EtOAc/hexane = 1:3): colorless oil (dr 9:1), 59.5 mg, 99%.

$^1\text{H-NMR}$  (400 MHz,  $\text{CDCl}_3$ )  $\delta$ : 6.72 (d,  $J = 10.2$  Hz, 1H), 6.09 (d,  $J = 10.2$  Hz, 1H), 4.39 (d,  $J = 2.6$  Hz, 1H), 3.77 (d,  $J = 10.1$  Hz, 1H), 3.67 (d,  $J = 10.1$  Hz, 1H), 2.48–2.41 (m, 1H), 1.03 (d,  $J = 7.0$  Hz, 3H), 0.93 (s, 9H), 0.84 (d,  $J = 6.8$  Hz, 3H), 0.13 (d,  $J = 3.1$  Hz, 6H).  $^{13}\text{C-NMR}$  (100 MHz,  $\text{CDCl}_3$ )  $\delta$ : 197.4, 145.1, 129.3, 92.5, 78.6, 68.4, 28.7, 25.9, 19.1, 18.5, 16.1, -5.1, -5.3. IR (KBr) 3401.5, 2943.2, 2863.9, 1689.4, 1465.1, 1254.0, 1108.3, 1064.1, 841.9, 780.5  $\text{cm}^{-1}$ ; HRMS ( $\text{CI}^+$ ) ( $m/z$ ) calcd. for  $\text{C}_{15}\text{H}_{29}\text{O}_4\text{Si}$  [ $\text{M}+\text{H}$ ] $^+$  301.1830; found 301.1842.

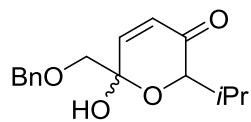

**2v** (EtOAc/hexane = 1:2): colorless oil (dr 9:1), 53 mg, 96%.  $^1\text{H-NMR}$

(400 MHz,  $\text{CDCl}_3$ )  $\delta$ : 7.43–7.29 (m, 5H), 6.79 (d,  $J = 10.2$  Hz, 1H), 6.09 (d,  $J = 10.2$  Hz, 1H), 4.78 (d,  $J = 11.9$  Hz, 1H), 4.68 (d,  $J = 12.0$  Hz, 1H), 4.43 (d,  $J = 2.7$  Hz, 1H), 3.64 (q,  $J = 10.5$  Hz, 2H), 2.51–2.43 (m, 1H), 1.07 (d,  $J = 7.0$  Hz, 3H), 0.87 (d,  $J = 6.8$  Hz, 3H).  $^{13}\text{C-NMR}$  (100 MHz,  $\text{CDCl}_3$ )  $\delta$ : 197.0, 145.0, 137.6, 129.0, 128.7, 128.2, 128.0, 93.0, 78.7, 74.4, 74.2, 28.8, 19.3, 16.3. IR (KBr) 3398.1, 2967.2, 2871.8, 1687.3, 1457.3, 1370.1, 1269.6, 1100.5, 752.7  $\text{cm}^{-1}$ ; HRMS ( $\text{CI}^+$ ) ( $m/z$ ) calcd. for  $\text{C}_{16}\text{H}_{21}\text{O}_4$  [ $\text{M}+\text{H}$ ] $^+$  277.1434; found 277.1432.

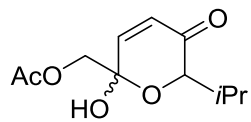

**2w** (EtOAc/hexane = 1:2): colorless oil (dr 9:1), 42 mg, 92%.  $^1\text{H-NMR}$

(400 MHz,  $\text{CDCl}_3$ )  $\delta$ : 6.86 (d,  $J = 10.3$  Hz, 1H), 6.10 (d,  $J = 10.2$  Hz, 1H), 4.43 (d,  $J = 11.6$  Hz, 1H), 4.38 (d,  $J = 2.7$  Hz, 1H), 4.07 (d,  $J = 11.7$  Hz, 1H), 2.46–2.39 (m, 1H), 2.12 (s, 3H), 1.01 (d,  $J = 7.0$  Hz, 3H), 0.82 (d,  $J = 6.8$  Hz, 3H).  $^{13}\text{C-NMR}$  (100 MHz,  $\text{CDCl}_3$ )  $\delta$ : 196.6, 171.3, 144.2, 128.6, 93.4, 92.2, 82.8, 78.6, 68.0, 66.0, 30.3, 28.9, 20.9, 20.9, 19.0, 18.8, 17.1, 16.0.

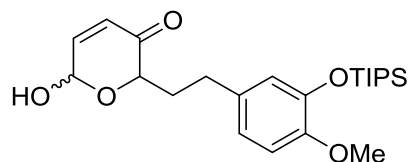

**2x** (EtOAc/hexane = 1:3): colorless oil (dr 7:3), 65.6 mg, 78%. <sup>1</sup>H-NMR (400 MHz, CDCl<sub>3</sub>) δ: 6.92–6.86 (m, 1H), 6.76–6.71 (m, 3H), 6.15–6.07 (m, 1H), 5.65–5.61 (m, 1H), 4.52 (dd, *J* = 8.3, 3.7 Hz, 0.7H), 4.00 (ddd, *J* = 8.8, 3.9, 1.2 Hz, 0.3H), 3.76 (s, 3H), 3.46 (s, 0.3H), 3.16 (s, 0.7H), 2.79–2.60 (m, 2H), 2.28–2.10 (m, 1H), 1.97–1.93 (m, 1H), 1.30–1.17 (m, 3H), 1.15–1.01 (m, 18H). <sup>13</sup>C-NMR (100 MHz, CDCl<sub>3</sub>) δ: 196.5, 196.2, 149.2, 149.1, 147.6, 145.4, 144.2, 133.8, 133.6, 128.8, 127.6, 121.2, 121.1, 120.9, 120.9, 112.2, 112.2, 90.9, 87.7, 77.7, 73.2, 55.6, 32.2, 31.4, 30.3, 17.9, 12.9.

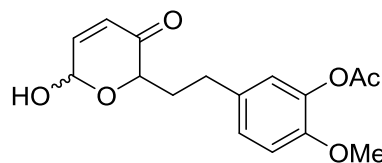

**2y** (EtOAc/hexane = 1:3): colorless oil (dr 7:3), 44.1 mg, 72%. <sup>1</sup>H-NMR (400 MHz, CDCl<sub>3</sub>) δ: 7.10–7.02 (m, 1H), 6.96–6.80 (m, 3H), 6.14–6.00 (m, 1H), 5.54–5.53 (m, 1H), 4.43 (dd, *J* = 9.3, 3.6 Hz, 0.7H), 3.98 (ddd, *J* = 8.9, 3.7, 1.2 Hz, 0.3H), 3.79 (s, 3H), 2.78–2.65 (m, 2H), 2.31–2.20 (m, 4H), 2.11–1.85 (m, 1H). <sup>13</sup>C-NMR (100 MHz, CDCl<sub>3</sub>) δ: 196.9, 170.1, 169.7, 149.2, 149.1, 148.1, 144.7, 139.1, 133.8, 133.6, 128.7, 127.4, 126.7, 126.6, 123.7, 123.3, 112.5, 112.4, 90.9, 87.5, 77.8, 72.5, 56.0, 31.6, 30.3, 30.1, 20.9, 20.8. IR (KBr) 3437.6, 2931.0, 2847.0, 1758.9, 1687.1, 1510.8, 1437.0, 1369.6, 1264.9, 1201.0, 1121.5, 1087.9, 1018.4, 756.6 cm<sup>-1</sup>; HRMS (CI<sup>+</sup>) (*m/z*) calcd. for C<sub>16</sub>H<sub>18</sub>O<sub>6</sub> [M]<sup>+</sup> 306.1098; found 306.1115.

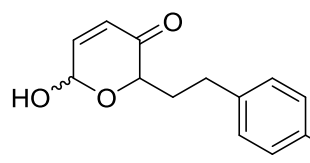

**2z** (EtOAc/hexane = 1:3): colorless oil (dr 7:3), 63.3 mg, 81%. <sup>1</sup>H-NMR (400 MHz, CDCl<sub>3</sub>) δ: 7.04 (d, *J* = 8.4 Hz, 2H), 6.9–6.84 (m, 1H), 6.78 (d, *J* = 8.4 Hz, 2H), 6.17–6.05 (m, 1H), 5.67–5.58 (m, 1H), 4.52 (dd, *J* = 8.5, 3.7 Hz, 0.7H), 4.01 (dd, *J* = 9.0, 3.8 Hz, 0.3H), 2.81–2.57 (m, 2H), 2.31–2.13 (m, 1H), 2.11–1.90 (m, 1H), 1.33–1.18 (m, 3H), 1.15–1.00 (m, 18H). <sup>13</sup>C-NMR (100 MHz, CDCl<sub>3</sub>) δ: 196.5, 196.2, 154.4, 147.6, 144.2, 133.8, 133.5, 133.5, 129.6, 129.5, 129.0, 127.9, 119.9, 119.9, 91.0, 87.9, 77.9, 73.4, 32.5, 31.6, 30.3, 29.9, 18.1, 18.1, 13.1, 12.8.

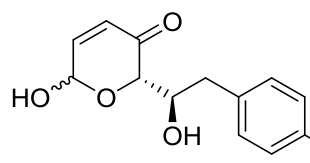

**2aa** (EtOAc/hexane = 1:1): colorless oil (dr 1:1), 61.7 mg, 88%. <sup>1</sup>H-NMR (400 MHz, CDCl<sub>3</sub>) δ: 7.41–7.21 (m, 2H), 7.13–7.09 (m, 2H), 7.06–6.82 (m, 1H), 6.15 (dd, *J* = 19.5, 10.4 Hz, 1H), 5.85–5.53 (m, 1H), 4.72–4.34 (m, 1H), 4.34–4.17 (m, 1H), 3.20–2.76 (m, 2H), 1.57 (s, 9H). <sup>13</sup>C-NMR (100 MHz, CDCl<sub>3</sub>) δ: 195.6, 195.2, 152.2, 149.9, 149.7, 146.3, 144.9, 135.4, 134.9, 130.5, 130.4, 127.9, 127.5, 121.6, 121.3, 121.1, 87.8,

87.2, 83.8, 83.7, 80.3, 74.8, 73.2, 71.4, 38.7, 38.6, 27.7. IR (KBr) 3380.0, 2981.7, 2931.8, 1750.6, 1688.7, 1508.5, 1370.8, 1266.8, 1146.1, 1022.3, 893.1, 831.1, 754.3  $\text{cm}^{-1}$ ; HRMS ( $\text{CI}^+$ ) ( $m/z$ ) calcd. for  $\text{C}_{18}\text{H}_{23}\text{O}_7$  [ $\text{M}+\text{H}$ ] $^+$  351.1438; found 351.1435.

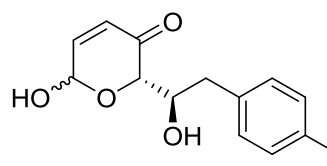

**2ab** (EtOAc/hexane = 1:2): colorless oil (dr 3:2), 62.7 mg, 86%.  $^1\text{H}$ -NMR (400 MHz,  $\text{CDCl}_3$ )  $\delta$ : 7.20–7.07 (m, 2H), 6.93–6.88 (m, 1H), 6.78–6.75 (m, 2H), 6.20–6.03 (m, 1H), 5.75–5.55 (m, 1H), 4.55–4.01 (m, 2H), 2.95–2.85 (m, 2H), 0.97 (s, 9H), 0.18–0.17 (m, 6H).  $^{13}\text{C}$ -NMR (100 MHz,  $\text{CDCl}_3$ )  $\delta$ : 194.9, 153.9, 153.7, 145.8, 130.0, 129.8, 129.7, 129.6, 128.9, 127.4, 126.9, 119.7, 119.5, 87.2, 86.5, 79.5, 74.2, 72.9, 71.1, 37.8, 25.0, 17.6, -5.1. IR (KBr) 3363.3, 2936.6, 2858.6, 1686.0, 1609.6, 1508.4, 1463.7, 1255.3, 1018.7, 911.1, 834.3, 772.9  $\text{cm}^{-1}$ ; HRMS ( $\text{CI}^+$ ) ( $m/z$ ) calcd. for  $\text{C}_{19}\text{H}_{28}\text{O}_5\text{Si}$  [ $\text{M}$ ] $^+$  364.1701; found 364.1699.

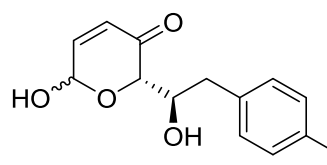

**2ac** (EtOAc/hexane = 1:2): colorless oil (dr 1:1), 68.7 mg, 85%.  $^1\text{H}$ -NMR (400 MHz,  $\text{CDCl}_3$ )  $\delta$ : 7.72 (dd,  $J$  = 8.2, 5.8 Hz, 2H), 7.33 (dd,  $J$  = 8.1, 4.6 Hz, 2H), 7.19 (dd,  $J$  = 8.6, 2.0 Hz, 2H), 7.01–6.87 (m, 3H), 6.16 (dd,  $J$  = 17.9, 10.4 Hz, 1H), 5.76–5.59 (m, 1H), 4.41–4.20 (m, 2H), 2.99–2.85 (m, 2H), 2.46 (d,  $J$  = 2.9 Hz, 3H).  $^{13}\text{C}$ -NMR (100 MHz,  $\text{CDCl}_3$ )  $\delta$ : 195.7, 195.2, 148.4, 148.3, 146.3, 145.5, 145.1, 137.0, 136.5, 132.4, 130.7, 130.6, 129.8, 129.8, 128.5, 128.5, 127.9, 127.6, 122.5, 122.4, 87.8, 87.2, 80.1, 74.7, 73.2, 71.4, 38.6, 38.6, 21.7. IR (KBr) 3344.0, 2927.9, 2867.2, 1686.3, 1598.0, 1500.6, 1364.3, 1270.2, 1150.1, 1095.3, 1020.9, 862.8, 753.7  $\text{cm}^{-1}$ ; HRMS ( $\text{CI}^+$ ) ( $m/z$ ) calcd. for  $\text{C}_{20}\text{H}_{20}\text{O}_7\text{S}$  [ $\text{M}$ ] $^+$  404.0924; found 404.0912.

#### Gram-scale synthesis of 2d with the recycle of $\text{Al}_2\text{O}_3$ .

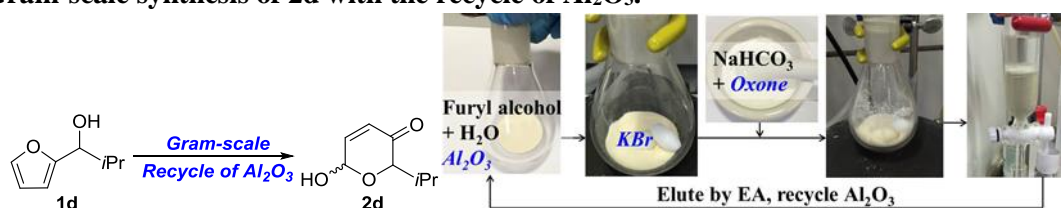

#### General Procedure F:

(Entry 1, Table 3, The main text) Aluminium oxide 90 active neutral (Merck, 0.063–0.200 mm) was equilibrated at 120  $^{\circ}\text{C}$  for 48 h, then it was cooled to RT under nitrogen. To a 100-mL round-bottomed flask was added two magnetic stirrers, furfuryl alcohol **1d** (1 g, 7.13 mmol) and the above activated aluminium oxide (4.28 g). The resulting mixture was stirred until uniformly free-flowing. To the above mixture was added  $\text{H}_2\text{O}$  (385 mg, 21.4 mmol) and KBr (84.4 mg, 0.71 mmol), and the mixture was stirred again to be free-flowing. To the above mixture was added  $\text{NaHCO}_3$  (600 mg, 7.13 mmol) and Oxone (4.38 g, 7.13 mmol), the mixture was stirred vigorously for 10 min at RT. Then the solid was transferred into a glass

column and eluted by EtOAc to get the crude product **2d**. The Al<sub>2</sub>O<sub>3</sub> was recycled by air flowing to remove the absorbed EtOAc.

(Recycle of Al<sub>2</sub>O<sub>3</sub> for the first time, Entry 2, Table 3, The main text) To the above recycled free-flowing solid was added H<sub>2</sub>O (770 mg, 42.8 mmol), and the mixture was stirred to be free-flowing. To the above mixture was added furyl alcohol **1d** (1 g, 7.13 mmol) and KBr (84.4 mg, 0.71 mmol), and the mixture was stirred to be free-flowing. NaHCO<sub>3</sub> (600 mg, 7.13 mmol) and Oxone (4.38 g, 7.13 mmol) were added in the end, and the mixture was stirred vigorously for 10 min at RT. Then the solid was transferred into a glass column and eluted by EtOAc to get the crude product **2d**. The Al<sub>2</sub>O<sub>3</sub> was reactivated by air flowing to remove the absorbed EtOAc.

(Recycle of Al<sub>2</sub>O<sub>3</sub> for the second to fifth time, Entry 3 to 6, Table 3, The main text) The detailed procedure was similar to the above, and the only difference was the H<sub>2</sub>O added and reaction time, which were listed in the Table 3 of the main text.

#### Gram-scale synthesis of **2d** using mortar with pestle.

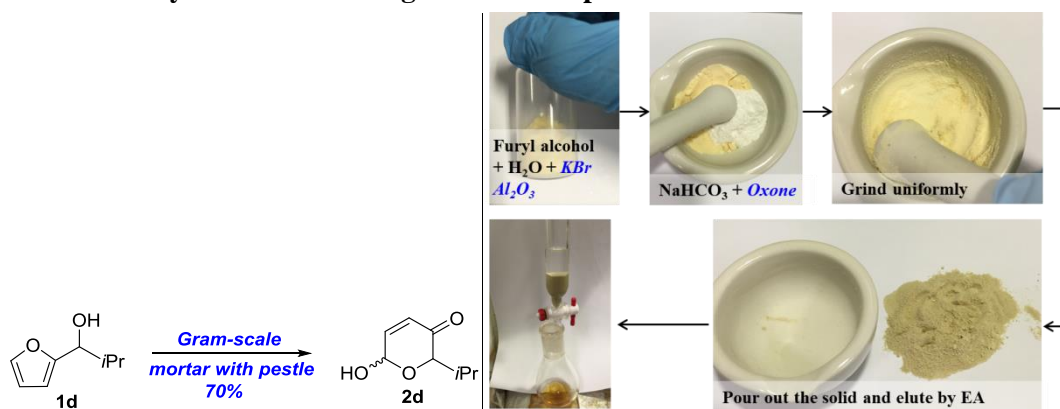

#### General Procedure G:

Add furyl alcohol **1d** (1 g, 7.13 mmol) to activated aluminium oxide (4.28 g), and the resulting mixture was shaken until uniformly free-flowing. To the above mixture was added H<sub>2</sub>O (385 mg, 21.4 mmol) and KBr (84.4 mg, 0.71 mmol), and the mixture was shaken again to be free-flowing. Pour the solid to mortar, add NaHCO<sub>3</sub> (600 mg, 7.13 mmol) and Oxone (4.38 g, 7.13 mmol), and the mixture was ground uniformly for 10 min at RT by pestle. Then the solid was transferred into a glass column and eluted by EtOAc to get the crude product **2d** (yield: 70%).

#### Solvent-free, one-pot, two-step reactions involving AchR.



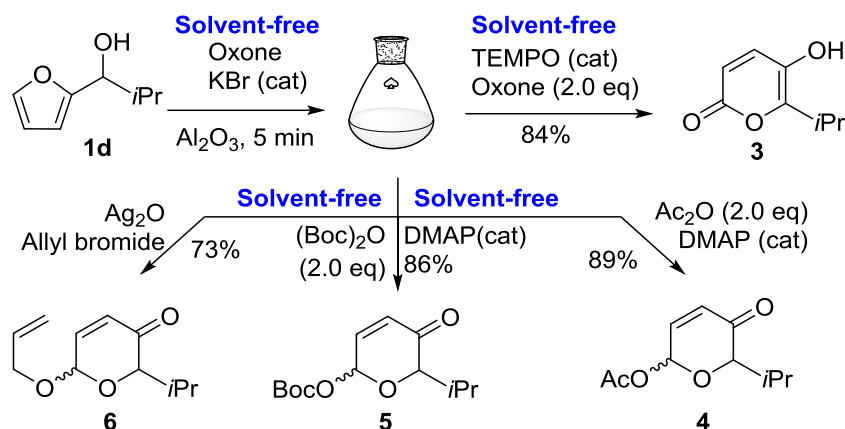

**General Procedure H:** Aluminium oxide 90 active neutral (Merck, 0.063–0.200 mm) was equilibrated with at 120 °C for 48 h, then it was cooled to RT under nitrogen. To a 5-mL round-bottomed flask was added a magnetic stirrer, furyl alcohol **1d** (28 mg, 0.2 mmol) and the above activated aluminium oxide (120 mg). The resulting mixture was stirred until uniformly free-flowing. To the above mixture was added H<sub>2</sub>O (7.2 mg, 0.4 mmol) and KBr (7.1 mg, 0.06 mmol), and the mixture was stirred again to be free-flowing. To the above mixture was added NaHCO<sub>3</sub> (16.8 mg, 0.2 mmol) and Oxone (123 mg, 0.2 mmol), the mixture was stirred vigorously for 5 min at RT to get the crude product **2d** suspended on Al<sub>2</sub>O<sub>3</sub>.

To the above solid containing **2d** was added TEMPO (6.25 mg, 0.04 mmol) and Oxone (246 mg, 0.4 mmol). After completion of the addition, the above solid was stirred vigorously for 10 min at RT. The resulting solid was transferred onto silica gel and purified by flash column chromatography (EtOAc/hexane = 1:1 to EtOAc) to give the product **3** (isomerize to the conjugated structure in silica gel for a long time).

**3** (EtOAc/hexane = 1:3): colorless oil, 25.9 mg, 84% for 2 steps. <sup>1</sup>H-NMR (400 MHz, MeOD)  $\delta$ : 7.40 (d,  $J$  = 9.7 Hz, 1H), 6.12 (d,  $J$  = 9.7 Hz, 1H), 3.24 (p,  $J$  = 7.0 Hz, 1H), 1.20 (d,  $J$  = 6.9 Hz, 6H). <sup>13</sup>C-NMR (100 MHz, MeOD)  $\delta$ : 164.8, 155.4, 143.9, 136.0, 113.4, 28.1, 19.9. IR (KBr) 3376.7, 2975.7, 2936.2, 2881.3, 1710.4, 1620.0, 1548.2, 1461.5, 1328.5, 1137.9, 754.8 cm<sup>-1</sup>; HRMS (CI<sup>+</sup>) ( $m/z$ ) calcd. for C<sub>8</sub>H<sub>10</sub>O<sub>3</sub> [M]<sup>+</sup> 154.0624; found 154.0636.

To the above solid containing **2d** was added NaHCO<sub>3</sub> (67.2 mg, 0.8 mmol), DMAP (12.2 mg, 0.1 mmol) and Ac<sub>2</sub>O (37.8  $\mu$ L, 0.4 mmol). After completion of the addition, the above solid was stirred vigorously for 10 min at RT. The resulting mixture was transferred onto silica gel and purified by flash column chromatography (EtOAc/hexane = 1:5) to give the product **4**.

**4** (EtOAc/hexane = 1:5): colorless oil (dr 7:3), 35.3 mg, 89% for 2 steps. <sup>1</sup>H-NMR (400 MHz, CDCl<sub>3</sub>)  $\delta$ : 6.92–6.74 (m, 1H), 6.51–6.49 (m, 1H), 6.17 (d,  $J$  = 10.4 Hz, 1H), 4.28 (d,  $J$  = 2.8 Hz, 0.78H), 3.87 (d,  $J$  = 6.6 Hz, 0.22H), 2.48–2.22 (m, 1H), 2.13–2.09 (m, 3H), 1.04 (d,  $J$  = 6.9 Hz, 3H), 0.85 (d,  $J$  = 6.9 Hz, 3H). <sup>13</sup>C-NMR (100 MHz, CDCl<sub>3</sub>)  $\delta$ :

195.7, 195.3, 169.6, 169.4, 143.2, 141.6, 129.2, 129.2, 87.9, 87.3, 84.3, 80.1, 30.5, 28.9, 21.1, 21.0, 18.8, 18.8, 17.9, 16.0.

To the above solid containing **2d** was added NaHCO<sub>3</sub> (67.2 mg, 0.8 mmol), DMAP (31.8 mg, 0.26 mmol) and Boc<sub>2</sub>O (91.9  $\mu$ L, 0.4 mmol). After completion of the addition, the above solid was stirred vigorously for 10 min at RT. The resulting mixture was transferred onto silica gel and purified by flash column chromatography (EtOAc/hexane = 1:5) to give the product **5**.

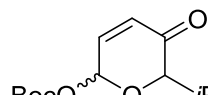

BocO **5** (EtOAc/hexane = 1:5): colorless oil (dr 9:1), 44.1 mg, 86% for 2 steps. <sup>1</sup>H-NMR (400 MHz, CDCl<sub>3</sub>)  $\delta$ : 6.89 (dd,  $J$  = 10.2, 3.7 Hz, 1H), 6.39 (d,  $J$  = 3.7 Hz, 1H), 6.21 (d,  $J$  = 10.2 Hz, 1H), 4.38 (d,  $J$  = 2.8 Hz, 1H), 2.49–2.44 (m, 1H), 1.55–1.53 (s, 9H), 1.05 (d,  $J$  = 7.0 Hz, 3H), 0.90 (d,  $J$  = 6.8 Hz, 3H). <sup>13</sup>C-NMR (100 MHz, CDCl<sub>3</sub>)  $\delta$ : 195.5, 151.8, 140.8, 129.4, 89.4, 83.5, 79.7, 28.6, 27.7, 18.7, 15.9.

To the above solid containing **2d** (in the preparation of **2d**, only 3.6 mg H<sub>2</sub>O was added) was added Ag<sub>2</sub>O (92.7 mg, 0.4 mmol) and allyl bromide (69  $\mu$ L, 0.8 mmol). After completion of the addition, the above solid was stirred vigorously for 15 min at RT. The resulting solid was transferred onto silica gel and purified by flash column chromatography (EtOAc/hexane = 1:5) to give the product **6**.

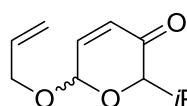

**6** (EtOAc/hexane = 1:5): colorless oil (dr 5:4), 28.6 mg, 73%. <sup>1</sup>H-NMR (400 MHz, CDCl<sub>3</sub>)  $\delta$ : 6.94–6.80 (m, 1H), 6.16–6.07 (m, 1H), 6.02–5.90 (m, 1H), 5.39–5.21 (m, 3H), 4.41 (ddt,  $J$  = 12.7, 5.2, 1.5 Hz, 0.5H), 4.33–4.11 (m, 2H), 3.84 (dd,  $J$  = 3.9, 1.2 Hz, 0.5H), 2.53–2.38 (m, 1H), 1.06 (dd,  $J$  = 8.0, 7.0 Hz, 3H), 0.92 (dd,  $J$  = 30.3, 6.8 Hz, 3H). <sup>13</sup>C-NMR (100 MHz, CDCl<sub>3</sub>)  $\delta$ : 196.1, 195.7, 146.4, 142.6, 133.0, 128.9, 127.7, 117.4, 94.6, 91.5, 82.5, 77.5, 76.7, 68.8, 68.8, 28.6, 27.7, 18.5, 18.5, 16.2, 15.4. IR (KBr) 2965.8, 2895.4, 2875.5, 1693.7, 1463.4, 1394.4, 1367.5, 1260.8, 1138.5, 1029.2, 927.4, 750.1 cm<sup>-1</sup>; HRMS (Cl<sup>+</sup>) (m/z) calcd. for C<sub>11</sub>H<sub>17</sub>O<sub>3</sub> [M+H]<sup>+</sup> 197.1172; found 197.1182.

### One-Pot sequential AchR/Kishi reduction and AchR-Ferrier allylation.

Nevertheless, we recognized that the one-pot, solvent-free condition could not be extended to AchR-Kishi reduction or AchR-Ferrier allylation. Since Kishi reduction and Ferrier-type allylation have been widely used for synthesis of tetrahydropyrans from AchR products, we aimed to achieve the one-pot reaction goal. Fortunately, we found that excess of BF<sub>3</sub>·Et<sub>2</sub>O (8.0 eq) could effect Kishi reduction and Ferrier-type allylation of the AchR product in the same reaction vessel by adding solvent dichloromethane, Et<sub>3</sub>SiH (12.0 eq) and allyltrimethylsilane (12.0 eq), respectively. The presence of neutral alumina might reduce the BF<sub>3</sub>·Et<sub>2</sub>O acidity and thus excess of BF<sub>3</sub>·Et<sub>2</sub>O was required for both Kishi reduction and Ferrier allylation. It was also noted that without addition of dichloromethane, the AchR product was rapidly decomposed by BF<sub>3</sub>·Et<sub>2</sub>O. Nevertheless, the one-pot process of two reactions still presented sufficient greenness, cost, and time advantages over the two-pot operation.

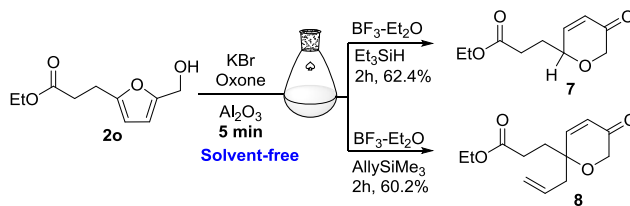

**General Procedure I:** Aluminium oxide 90 active neutral (Merck, 0.063–0.200 mm) was equilibrated at 120 °C for 48 h, then it was cooled to RT under nitrogen. To a 5-mL round-bottomed flask was added a magnetic stirrer, furyl alcohol **1o** (29.7 mg, 0.15 mmol) and the above activated aluminium oxide (90 mg, 600 eq). The resulting mixture was stirred until uniformly free-flowing. To the above mixture was added H<sub>2</sub>O (2.7 mg, 0.15 mmol) and KBr (1.8 mg, 0.015 mmol), and the mixture was stirred again to be free-flowing. To the above mixture was added NaHCO<sub>3</sub> (12.6 mg, 0.15 mmol) and Oxone (92.2 mg, 0.15 mmol), the mixture was stirred vigorously for 5 min at RT to get the crude product **2o** suspended on Al<sub>2</sub>O<sub>3</sub>. To the above solid were added Et<sub>3</sub>SiH (287 µL, 1.8 mmol) or allyltrimethylsilane (287 µL, 1.8 mmol) and DCM (1 mL). The above mixture was cooled to –40 °C, and BF<sub>3</sub>•OEt<sub>2</sub> (148 µL, 1.2 mmol) was added dropwise under nitrogen. After completion of the addition, the mixture was warmed to –20 °C and stirred for 2 h. The reaction was quenched by saturated aqueous NaHCO<sub>3</sub> solution (30 mL), and the residue was extracted with DCM (3 × 10 mL). The combined organic fractions were washed with brine, dried over Na<sub>2</sub>SO<sub>4</sub>, filtered and concentrated under reduced pressure. The resulting residue was purified by flash column chromatography (EtOAc/hexane = 1:5) to give the product **7** or **8**.

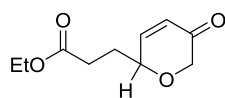

**7** (EtOAc/hexane = 1:5): colorless oil, 18.6 mg, 62.4% for 2 steps.

<sup>1</sup>H-NMR (400 MHz, CDCl<sub>3</sub>) δ: 6.95 (dd, *J* = 10.5, 1.9 Hz, 1H), 6.15 (dd, *J* = 10.5, 2.3 Hz, 1H), 4.39 (ddd, *J* = 8.5, 4.2, 2.1 Hz, 1H), 4.26 (d, *J* = 16.3 Hz, 1H), 4.15 (q, *J* = 7.1 Hz, 2H), 4.08 (dd, *J* = 16.3, 1.8 Hz, 1H), 2.53–2.43 (m, 2H), 2.12–1.91 (m, 2H), 1.26 (t, *J* = 7.1 Hz, 3H). <sup>13</sup>C-NMR (100 MHz, CDCl<sub>3</sub>) δ: 194.8, 173.2, 151.2, 127.4, 72.6, 71.3, 60.7, 29.8, 29.2, 14.4. IR (KBr) 2981.3, 2935.5, 2820.4, 1728.4, 1695.0, 1382.4, 1325.7, 1264.7, 1176.3, 1100.9, 1031.5, 754.4 cm<sup>-1</sup>; HRMS (CI<sup>+</sup>) (*m/z*) calcd. for C<sub>10</sub>H<sub>13</sub>O<sub>4</sub> [M-H]<sup>+</sup> 197.0808; found 197.0819.

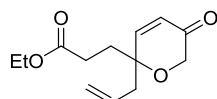

**8** (EtOAc/hexane = 1:5): colorless oil, 21.5 mg, 60.2 for 2 steps. <sup>1</sup>H-NMR

(400 MHz, CDCl<sub>3</sub>) δ: 6.87 (d, *J* = 10.6 Hz, 1H), 6.10 (d, *J* = 10.6 Hz, 1H), 5.85–5.75 (m, 1H), 5.19–5.14 (m, 2H), 4.31–4.16 (m, 2H), 4.12 (q, *J* = 7.1 Hz, 2H), 2.52–2.31 (m, 4H), 2.09–1.98 (m, 2H), 1.24 (t, *J* = 7.2 Hz, 3H). <sup>13</sup>C-NMR (100 MHz, CDCl<sub>3</sub>) δ: 194.3, 173.4, 154.0, 132.0, 126.5, 119.6, 75.8, 67.3, 60.7, 40.8, 31.8, 28.8, 14.3. IR (KBr) 2980.1, 2936.1, 1729.9, 1693.5, 1438.7, 1391.9, 1266.1, 1181.3, 1094.4, 756.0 cm<sup>-1</sup>; HRMS (CI<sup>+</sup>) (*m/z*) calcd. for C<sub>13</sub>H<sub>19</sub>O<sub>4</sub> [M+H]<sup>+</sup> 239.1278; found 239.1280.

## Reference:

1. P. A. Caruana and A. J. Frontier, *Tetrahedron*, 2004, **60**, 10921-10926.
2. A. G. Csáký, M. Mba and J. Plumet, *Synlett*, 2003, **2003**, 2092-2094.
3. P. Srihari and Y. Sridhar, *Eur. J. Org. Chem.*, 2011, **2011**, 6690-6697.
4. M. C. Warner, G. A. Shevchenko, S. Jouda, K. Bogár and J.-E. Bäckvall, *Chem. A. Eur. J.*, 2013, **19**, 13859-13864.
5. S. Canova, R. Lépine, A. Thys, A. Baron and D. Roche, *Bioorg. Med. Chem. Lett.*, 2011, **21**, 4768-4772.
6. C. Xu and C. Yuan, *Tetrahedron*, 2005, **61**, 2169-2186.
7. H.-Y. Wang, K. Yang, S. R. Bennett, S.-r. Guo and W. Tang, *Angew. Chem., Int. Ed.*, 2015, **54**, 8756-8759.
8. Z. Li, F. C. F. Ip, N. Y. Ip and R. Tong, *Chem. A. Eur. J.*, 2015, **21**, 11152-11157.
9. Z. Li and R. Tong, *J. Org. Chem.*, 2017, **82**, 1127-1135.
10. A. S. K. Hashmi, M. Ghanbari, M. Rudolph and F. Rominger, *Chem. A. Eur. J.*, 2012, **18**, 8113-8119.
11. L. Zhu, L. Song and R. Tong, *Org. Lett.*, 2012, **14**, 5892-5895.
12. A. S. K. Hashmi, M. Hamzić, M. Rudolph, M. Ackermann and F. Rominger, *Adv. Synth. Catal.*, 2009, **351**, 2469-2481.

# Copies of $^1\text{H}$ - and $^{13}\text{C}$ -NMR Spectra

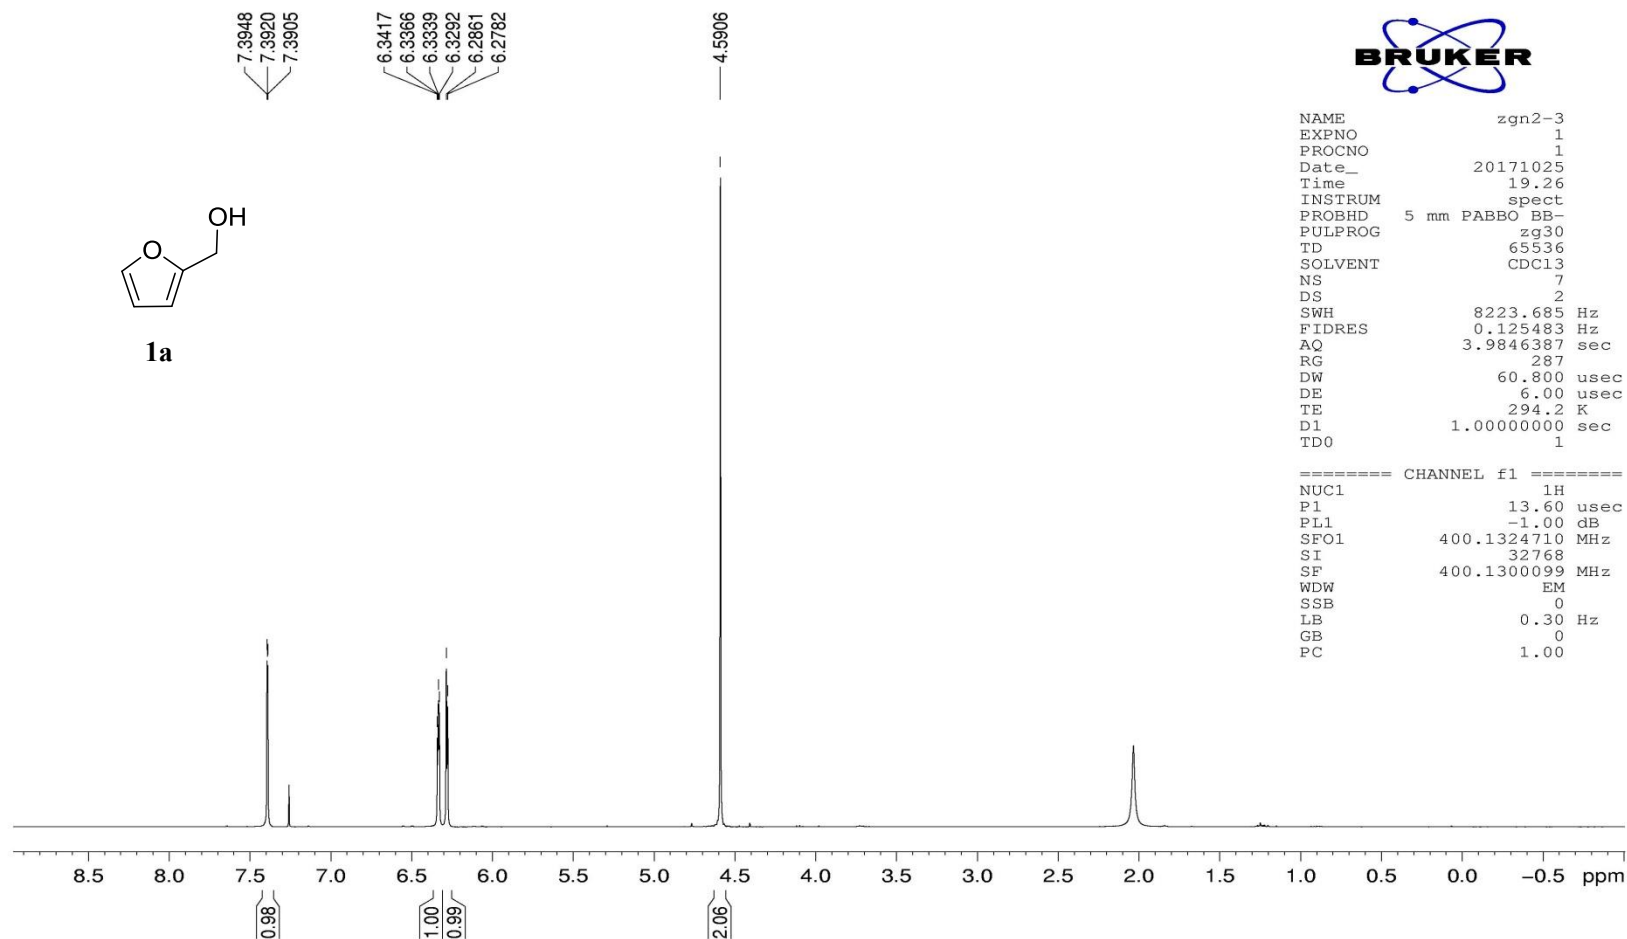

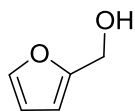

**1a**

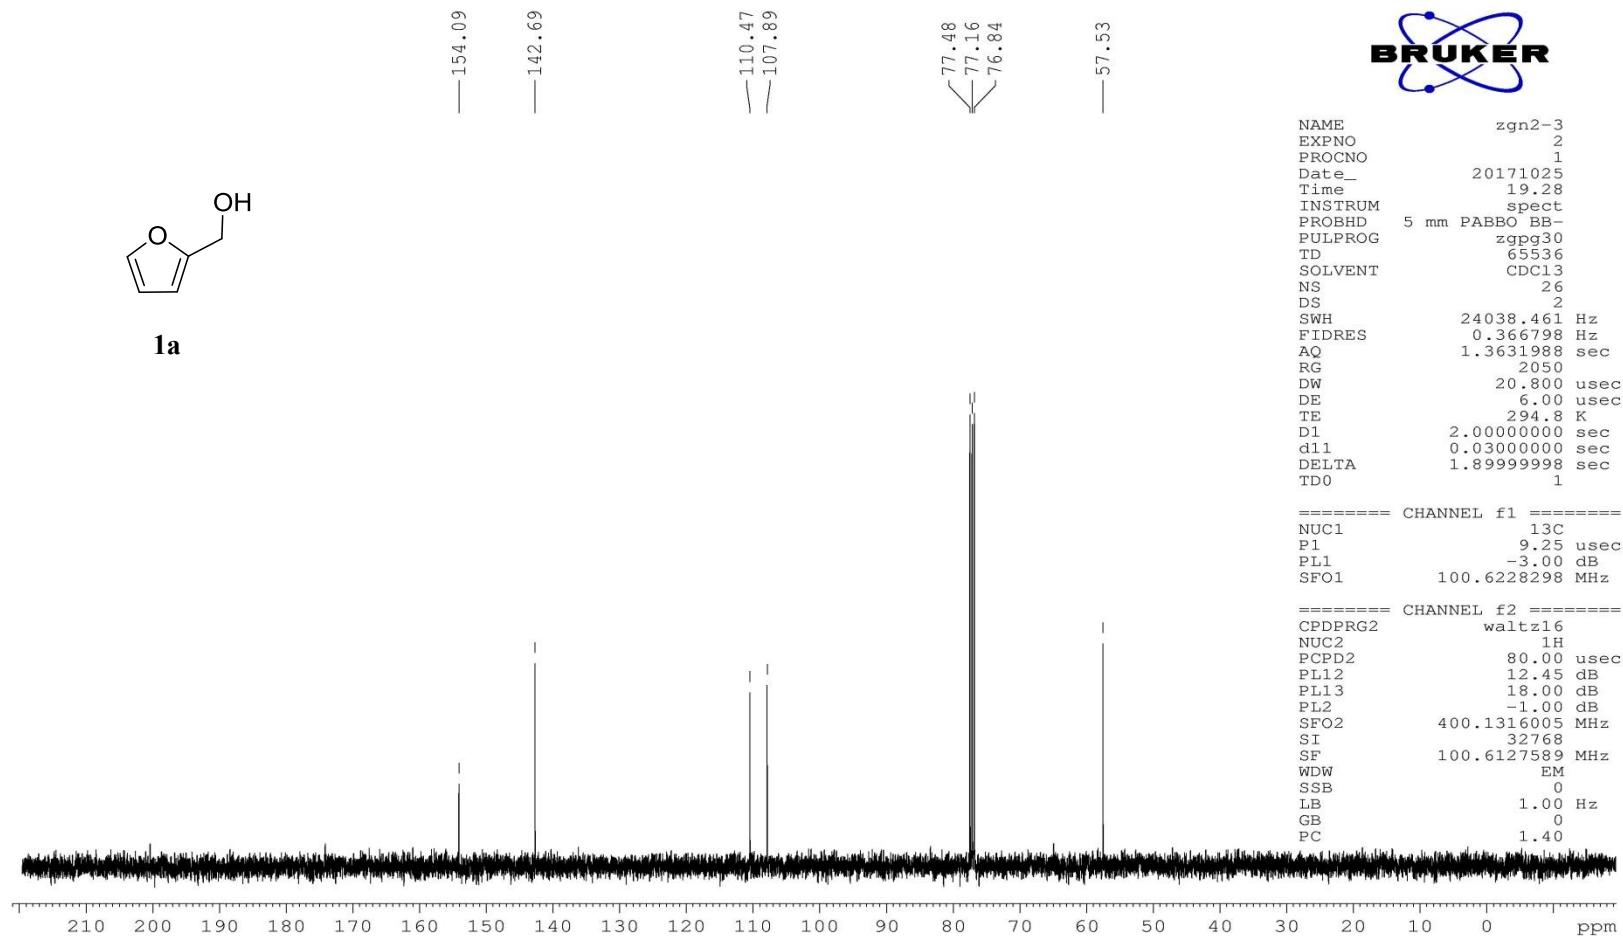

7.2593  
6.9711  
6.9634  
6.9452  
6.9375  
6.1775  
6.1516  
5.6443  
5.6366  
5.6313  
5.6237  
4.5929  
4.5507  
4.1562  
4.1140  
3.4130  
3.3997

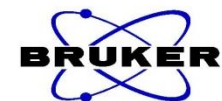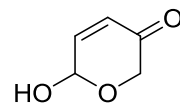

2a

NAME zgo92  
EXPNO 1  
PROCNO 1  
Date\_ 20180317  
Time 22.58  
INSTRUM spect  
PROBHD 5 mm DUL 13C-1  
PULPROG zg30  
TD 65536  
SOLVENT CDC13  
NS 3  
DS 2  
SWH 8012.820 Hz  
FIDRES 0.122266 Hz  
AQ 4.0894966 sec  
RG 187.77  
DW 62.400 usec  
DE 6.50 usec  
TE 297.2 K  
D1 1.00000000 sec  
TD0 1

===== CHANNEL f1 =====  
SFO1 400.1324710 MHz  
NUC1 1H  
P1 14.30 usec  
SI 65536  
SF 400.1300109 MHz  
WDW EM  
SSB 0  
LB 0.30 Hz  
GB 0  
PC 1.00

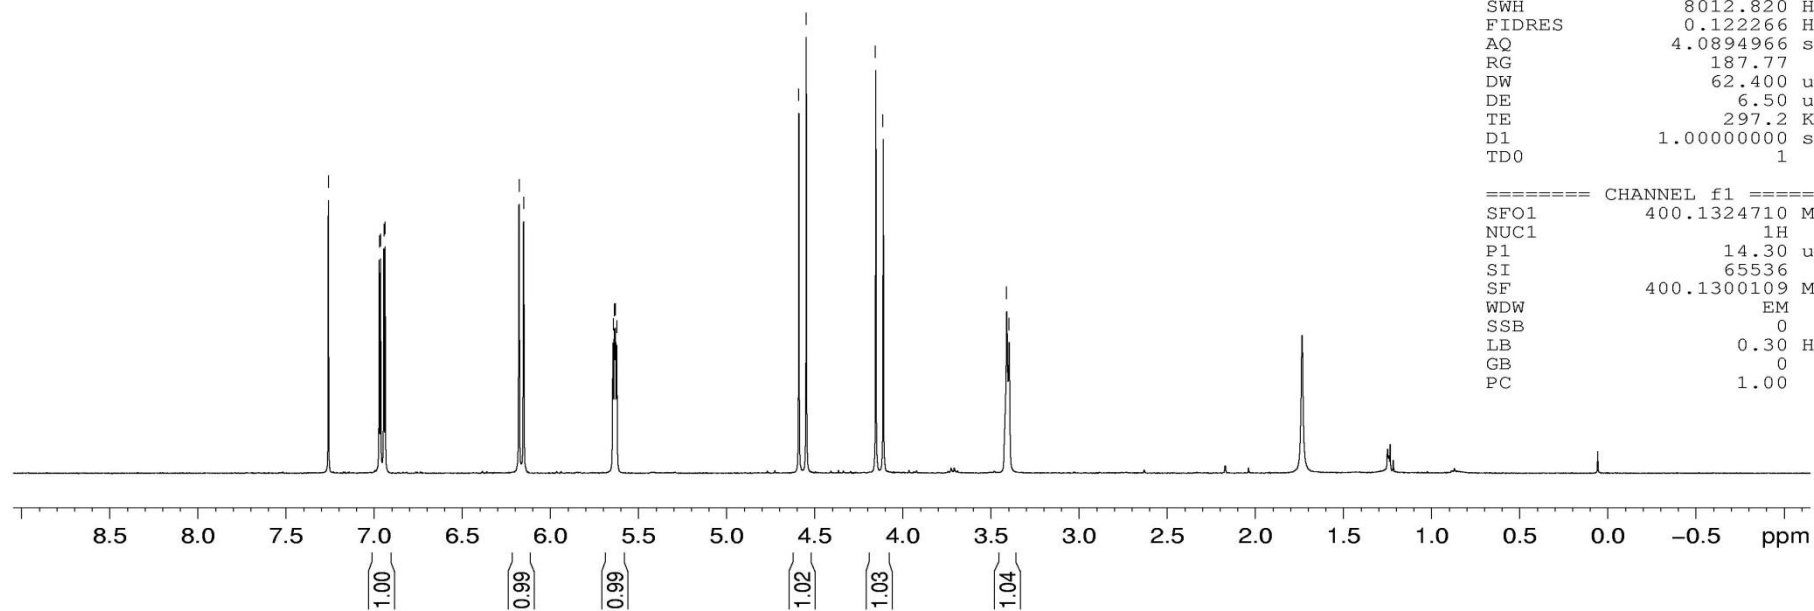

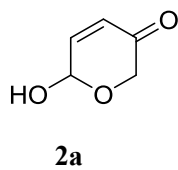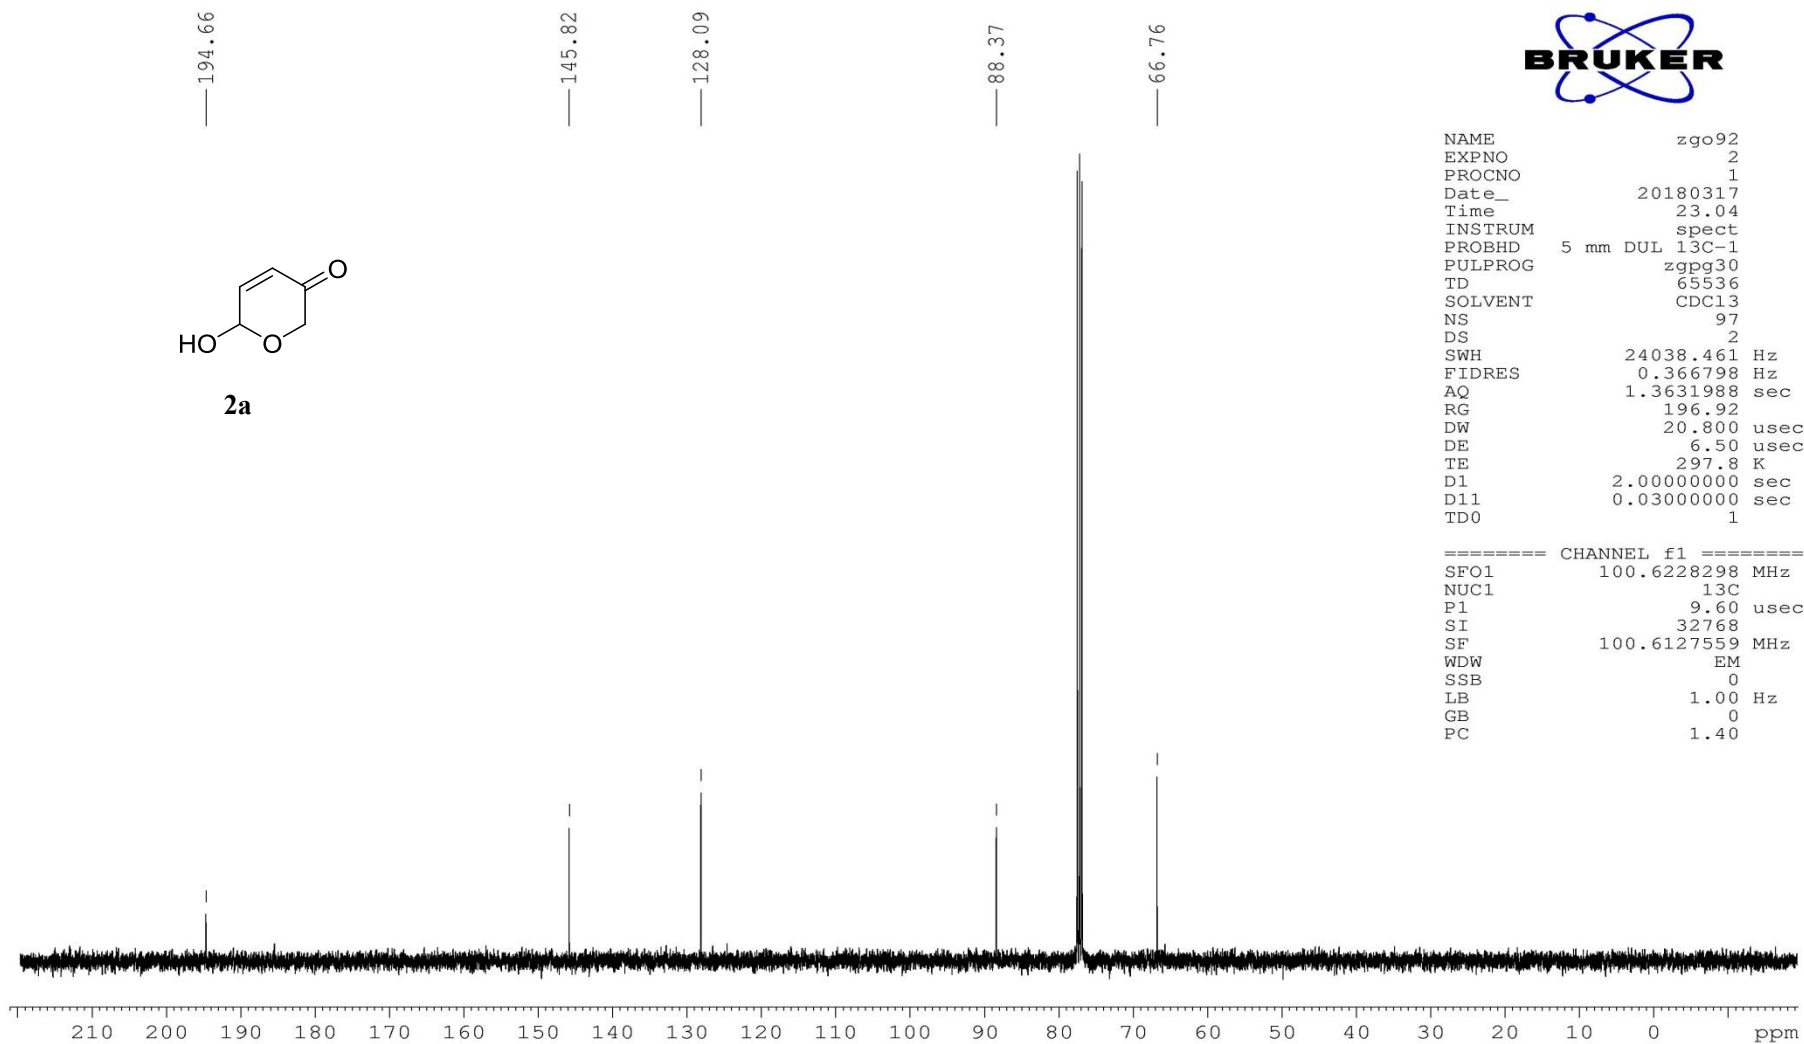



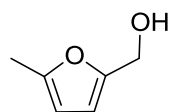

**1b**

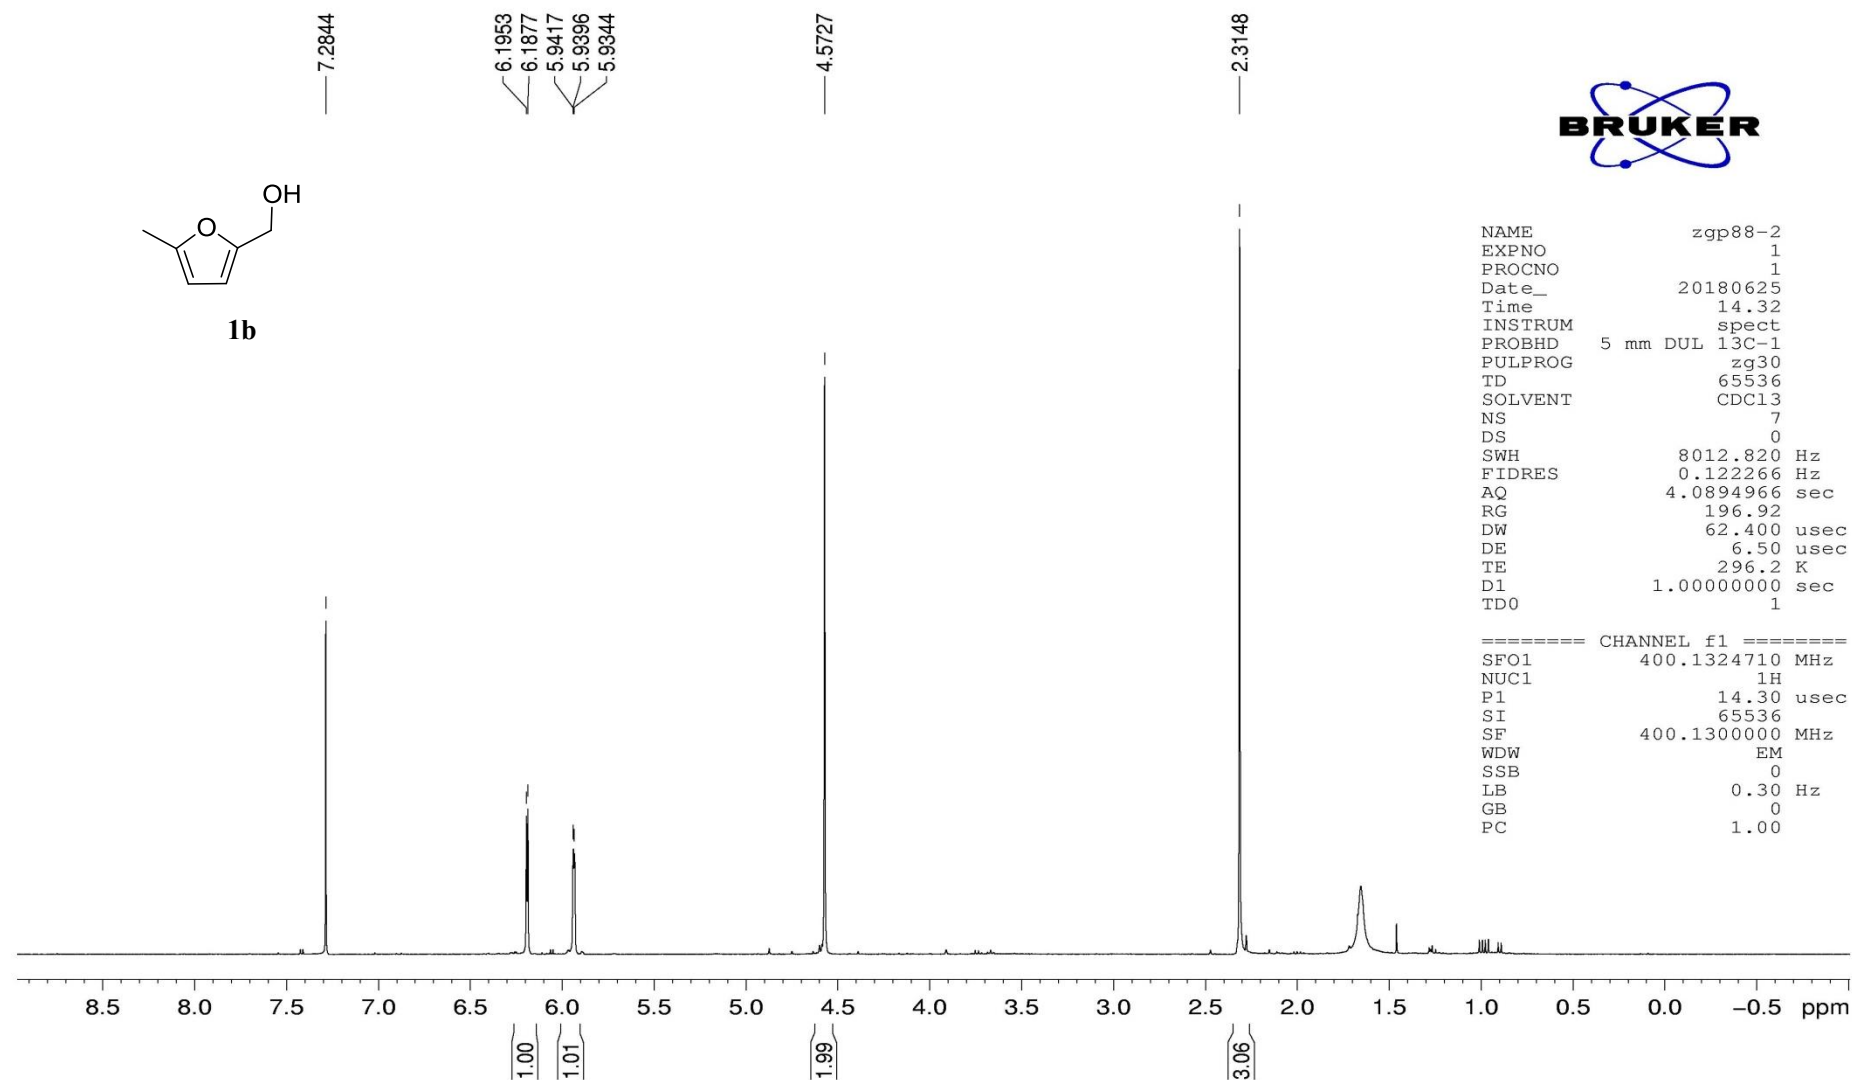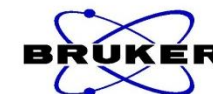

```

NAME          zgp88-2
EXPNO          1
PROCNO         1
Date_         20180625
Time           14.32
INSTRUM        spect
PROBHD         5 mm DUL 13C-1
PULPROG        zg30
TD             65536
SOLVENT        CDCl3
NS              7
DS              0
SWH            8012.820 Hz
FIDRES         0.122266 Hz
AQ             4.0894966 sec
RG             196.92
DW             62.400 usec
DE              6.50 usec
TE             296.2 K
D1             1.00000000 sec
TD0            1

===== CHANNEL f1 =====
SFO1          400.1324710 MHz
NUC1           1H
P1            14.30 usec
SI            65536
SF            400.1300000 MHz
WDW            EM
SSB            0
LB             0.30 Hz
GB            0
PC            1.00
  
```

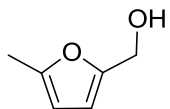

**1b**

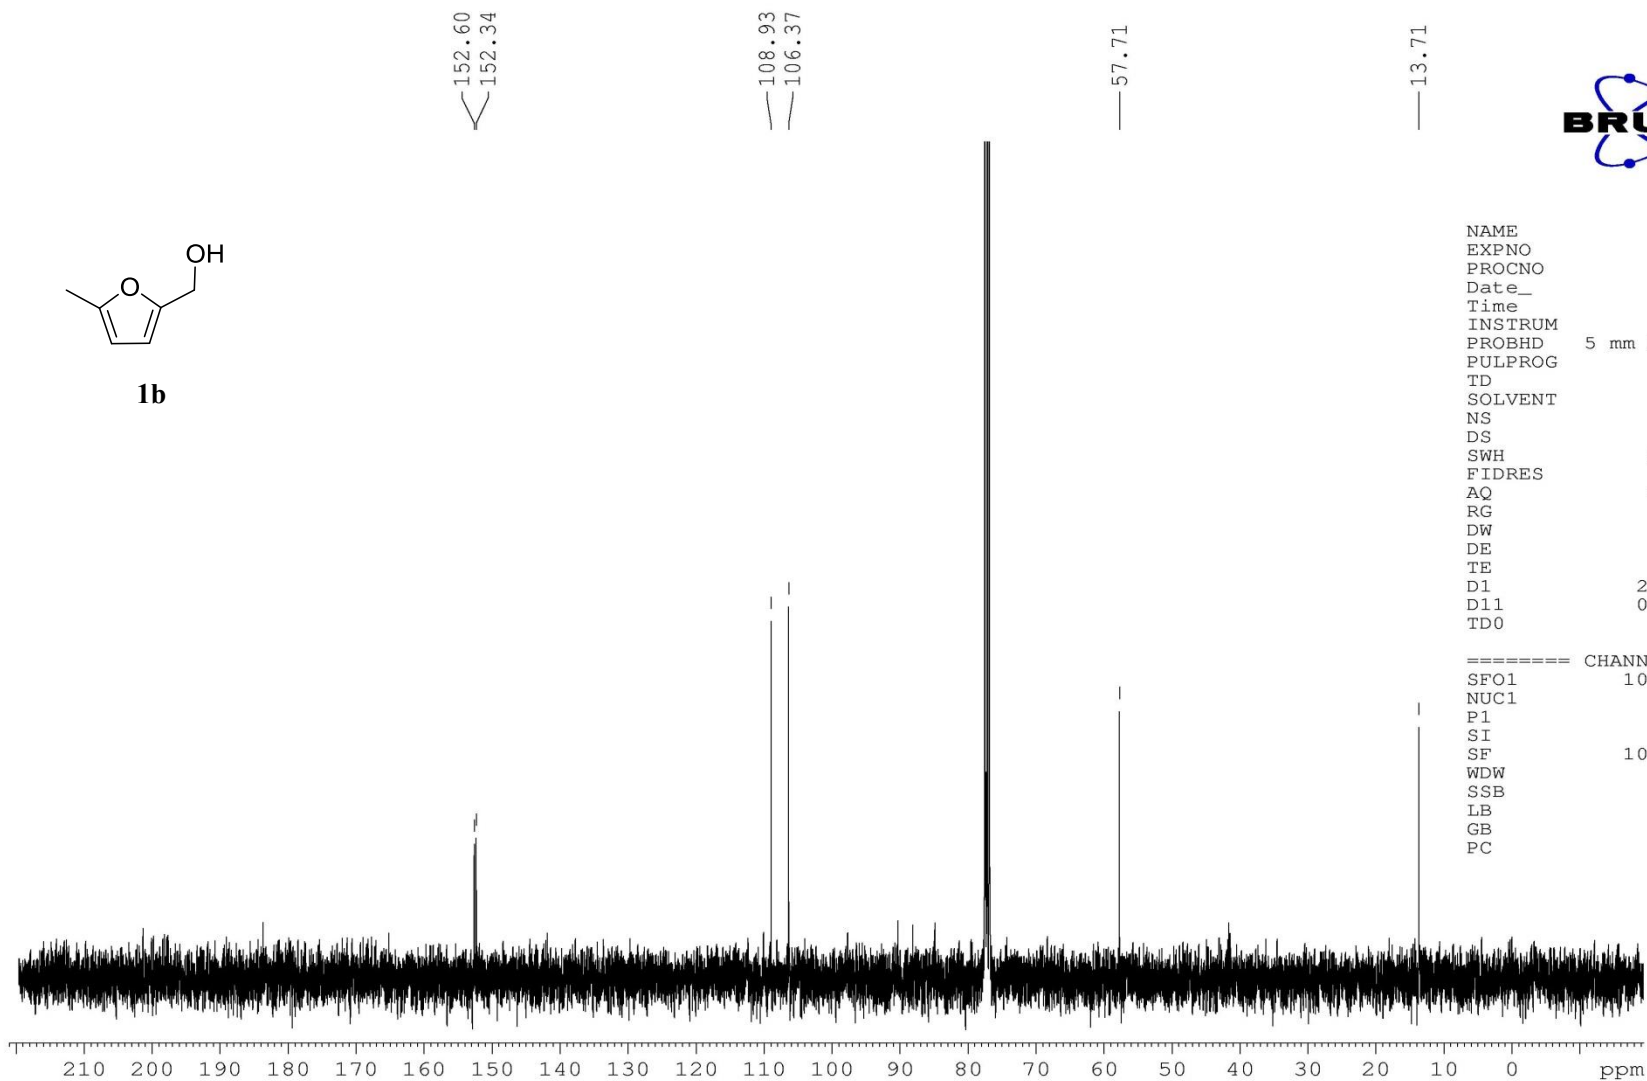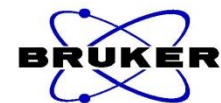

```

NAME                zgp88-2
EXPNO                2
PROCNO              1
Date_               20180625
Time                14.34
INSTRUM             spect
PROBHD              5 mm DUL 13C-1
PULPROG             zgpg30
TD                  65536
SOLVENT             CDC13
NS                   247
DS                   0
SWH                 24038.461 Hz
FIDRES              0.366798 Hz
AQ                  1.3631988 sec
RG                   196.92
DW                  20.800 usec
DE                   6.50 usec
TE                  296.3 K
D1                   2.00000000 sec
D11                  0.03000000 sec
TD0                  1
  
```

```

===== CHANNEL f1 =====
SFO1                100.6228298 MHz
NUC1                 13C
P1                   9.60 usec
SI                   32768
SF                  100.6127556 MHz
WDW                  EM
SSB                   0
LB                   1.00 Hz
GB                   0
PC                   1.40
  
```

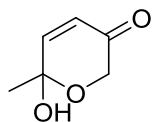

2b

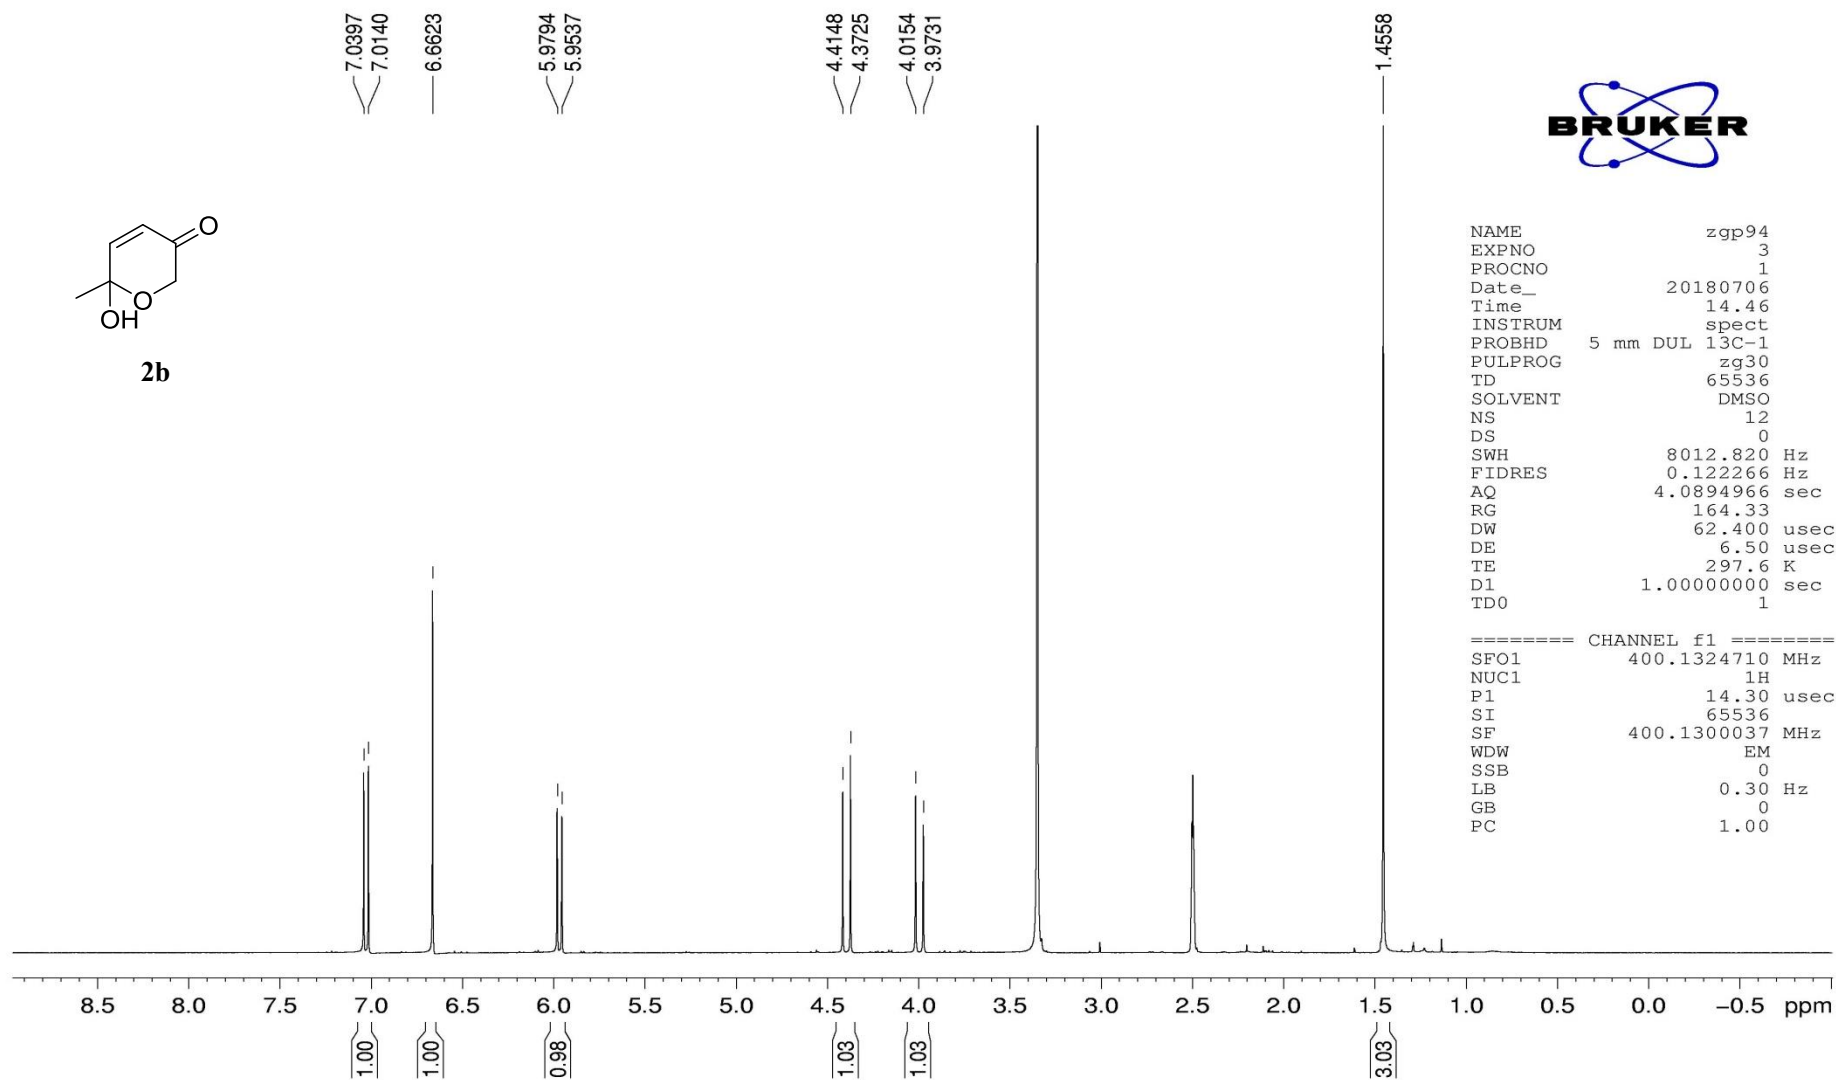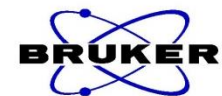

```

NAME                zgp94
EXPNO                3
PROCNO              1
Date_               20180706
Time                14.46
INSTRUM             spect
PROBHD              5 mm DUL 13C-1
PULPROG             zg30
TD                  65536
SOLVENT             DMSO
NS                   12
DS                   0
SWH                 8012.820 Hz
FIDRES              0.122266 Hz
AQ                  4.0894966 sec
RG                   164.33
DW                   62.400 usec
DE                   6.50 usec
TE                   297.6 K
D1                   1.00000000 sec
TD0                  1

===== CHANNEL f1 =====
SFO1                 400.1324710 MHz
NUC1                  1H
P1                    14.30 usec
SI                    65536
SF                   400.1300037 MHz
WDW                   EM
SSB                    0
LB                    0.30 Hz
GB                     0
PC                     1.00
  
```

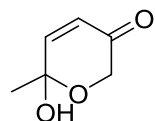

2b

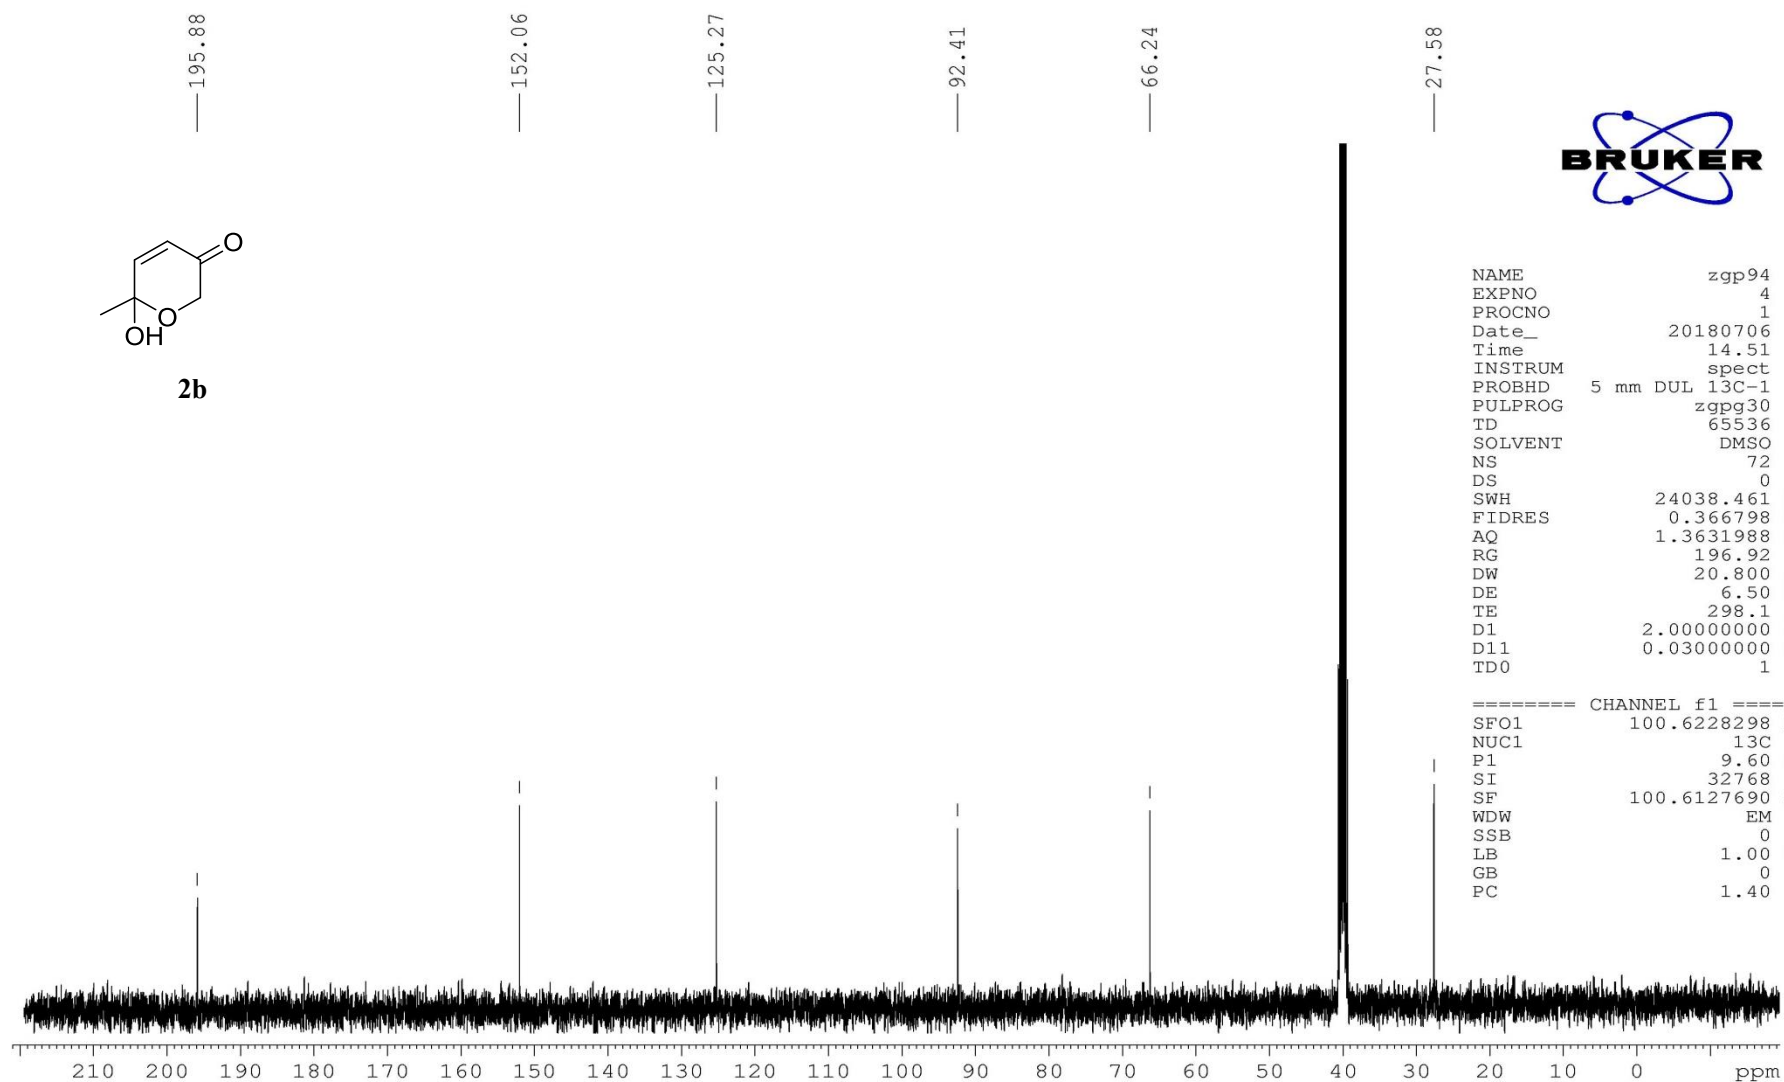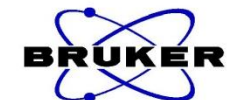

```

NAME                zgp94
EXPNO                4
PROCNO              1
Date_               20180706
Time                14.51
INSTRUM             spect
PROBHD              5 mm DUL 13C-1
PULPROG             zgpg30
TD                  65536
SOLVENT             DMSO
NS                   72
DS                   0
SWH                 24038.461 Hz
FIDRES              0.366798 Hz
AQ                  1.3631988 sec
RG                   196.92
DW                   20.800 usec
DE                   6.50 usec
TE                   298.1 K
D1                   2.00000000 sec
D11                  0.03000000 sec
TD0                  1
  
```

```

===== CHANNEL f1 =====
SFO1                100.6228298 MHz
NUC1                 13C
P1                   9.60 usec
SI                   32768
SF                   100.6127690 MHz
WDW                  EM
SSB                  0
LB                   1.00 Hz
GB                   0
PC                   1.40
  
```

7.3902  
7.3880  
7.3859  
7.2841

6.3499  
6.3451  
6.3420  
6.3374  
6.2485  
6.2405

4.9197  
4.9033  
4.8869  
4.8704

1.5664  
1.5500

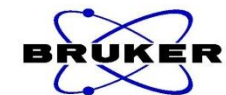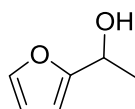

1c

```

NAME          zgp115
EXPNO          1
PROCNO         1
Date_          20180713
Time           15.33
INSTRUM        spect
PROBHD         5 mm DUL 13C-1
PULPROG        zg30
TD             65536
SOLVENT        CDCl3
NS             1
DS             0
SWH            8012.820 Hz
FIDRES         0.122266 Hz
AQ            4.0894966 sec
RG            103.52
DW            62.400 usec
DE            6.50 usec
TE            296.9 K
D1            1.00000000 sec
TD0           1
  
```

```

===== CHANNEL f1 =====
SFO1          400.1324710 MHz
NUC1           1H
P1            14.30 usec
SI            65536
SF            400.1300000 MHz
WDW            EM
SSB            0
LB            0.30 Hz
GB            0
PC            1.00
  
```

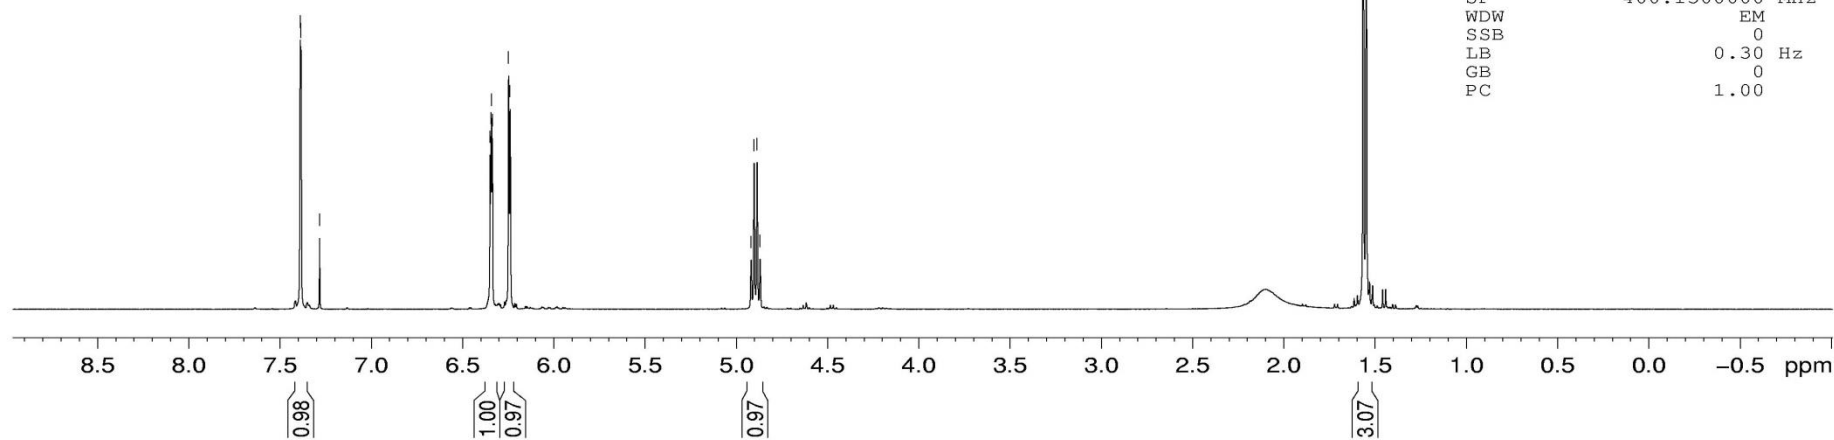

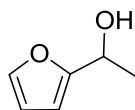

**1c**

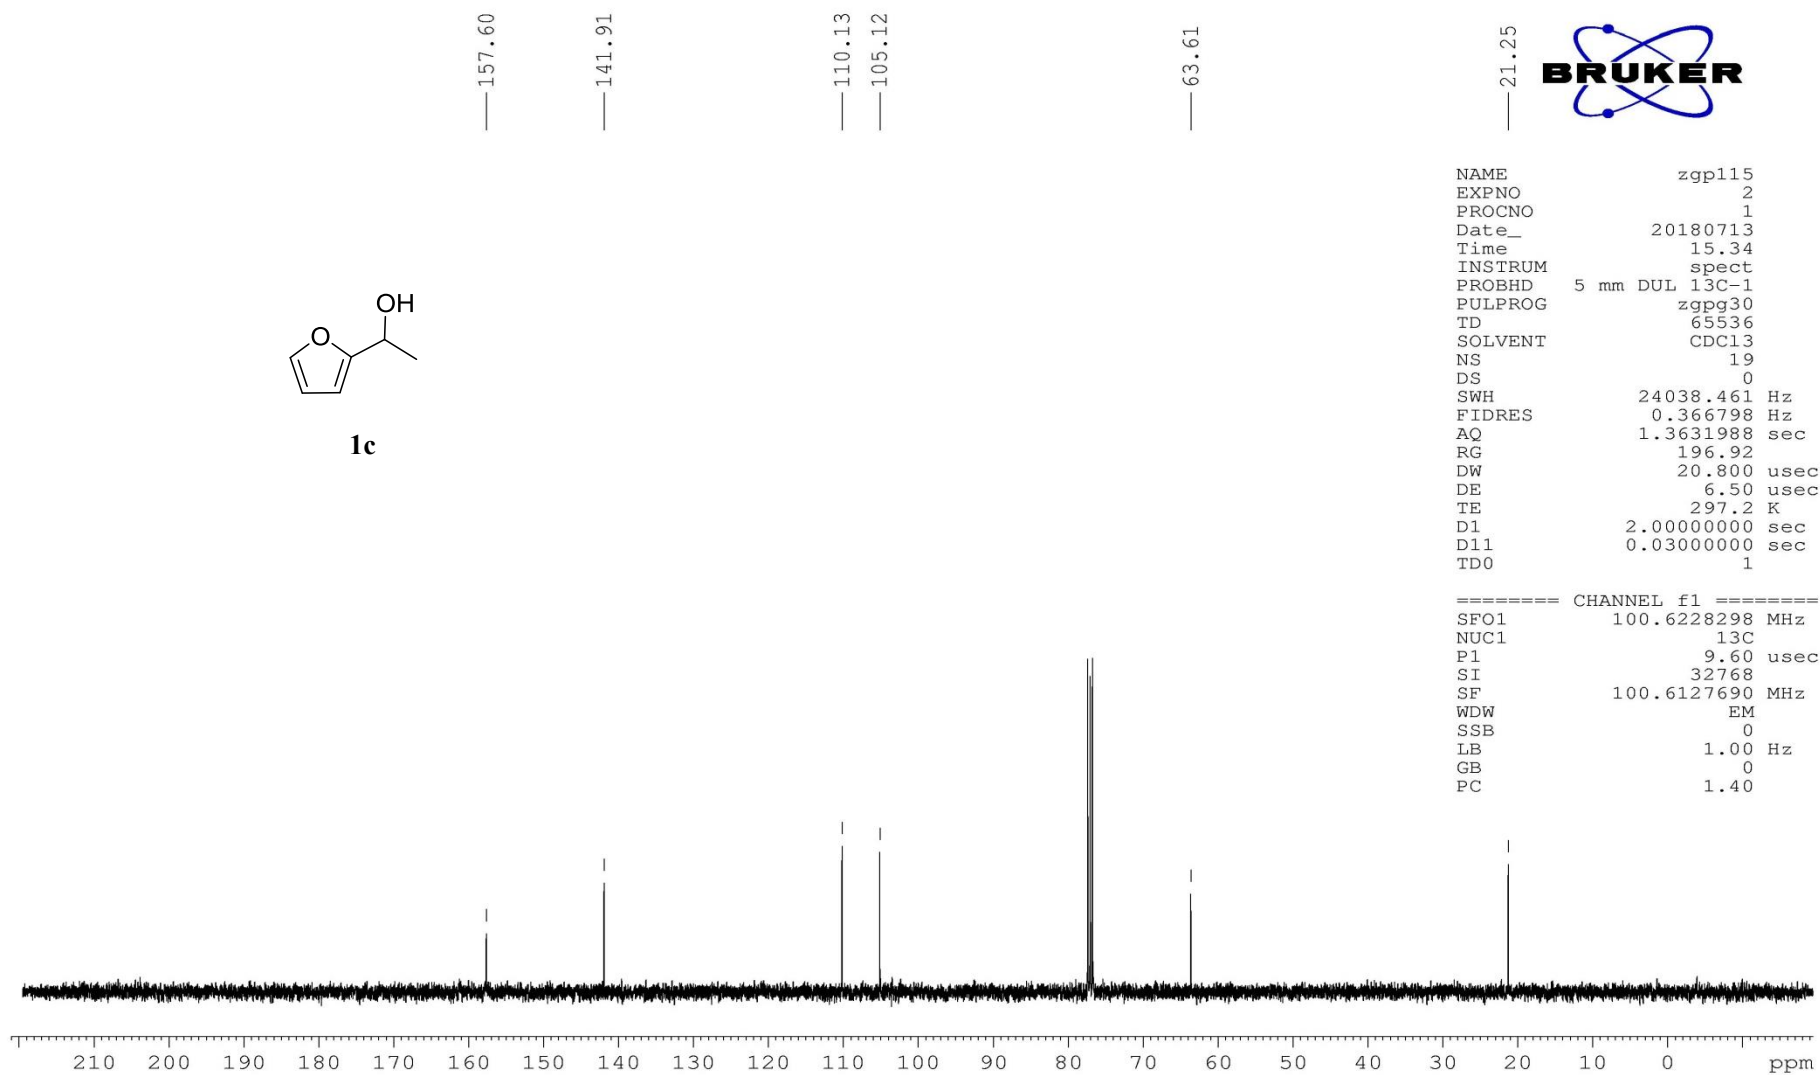

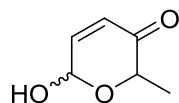

2c

6.9757  
6.9725  
6.9501  
6.9468  
6.9307  
6.9222  
6.9052  
6.8966  
6.1814  
6.1786  
6.1558  
6.1530  
6.1309  
6.1054  
5.6918  
5.6464  
5.6381  
4.7550  
4.7381  
4.7211  
4.7042  
4.2703  
4.2535  
4.2367  
4.2201

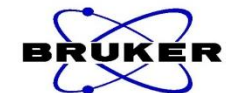

NAME zgp117  
EXPNO 1  
PROCNO 1  
Date\_ 20180713  
Time 20.20  
INSTRUM spect  
PROBHD 5 mm DUL 13C-1  
PULPROG zg30  
TD 65536  
SOLVENT CDCl3  
NS 1  
DS 0  
SWH 8012.820 Hz  
FIDRES 0.122266 Hz  
AQ 4.0894966 sec  
RG 112.31  
DW 62.400 usec  
DE 6.50 usec  
TE 296.1 K  
D1 1.00000000 sec  
TD0 1

===== CHANNEL f1 =====  
SFO1 400.1324710 MHz  
NUC1 1H  
P1 14.30 usec  
SI 65536  
SF 400.1300000 MHz  
WDW EM  
SSB 0  
LB 0.30 Hz  
GB 0  
PC 1.00

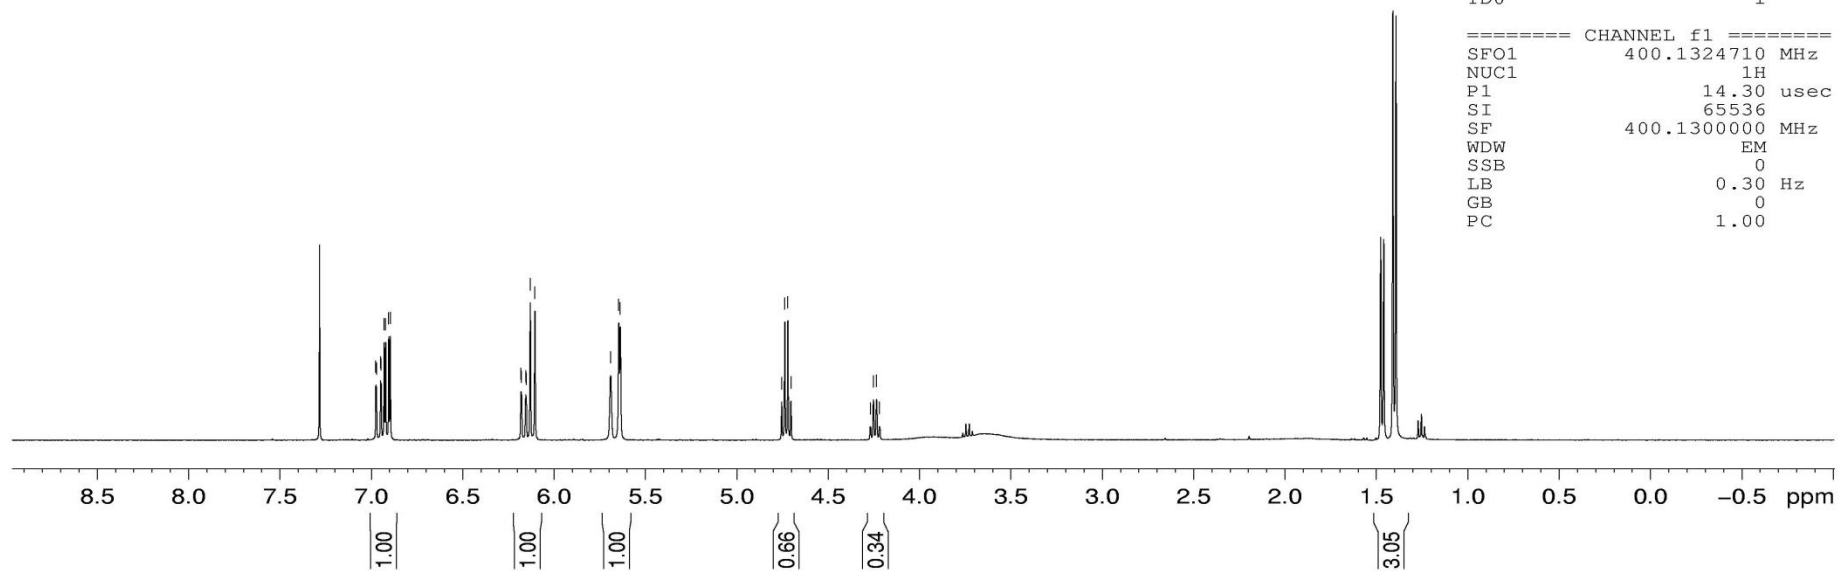

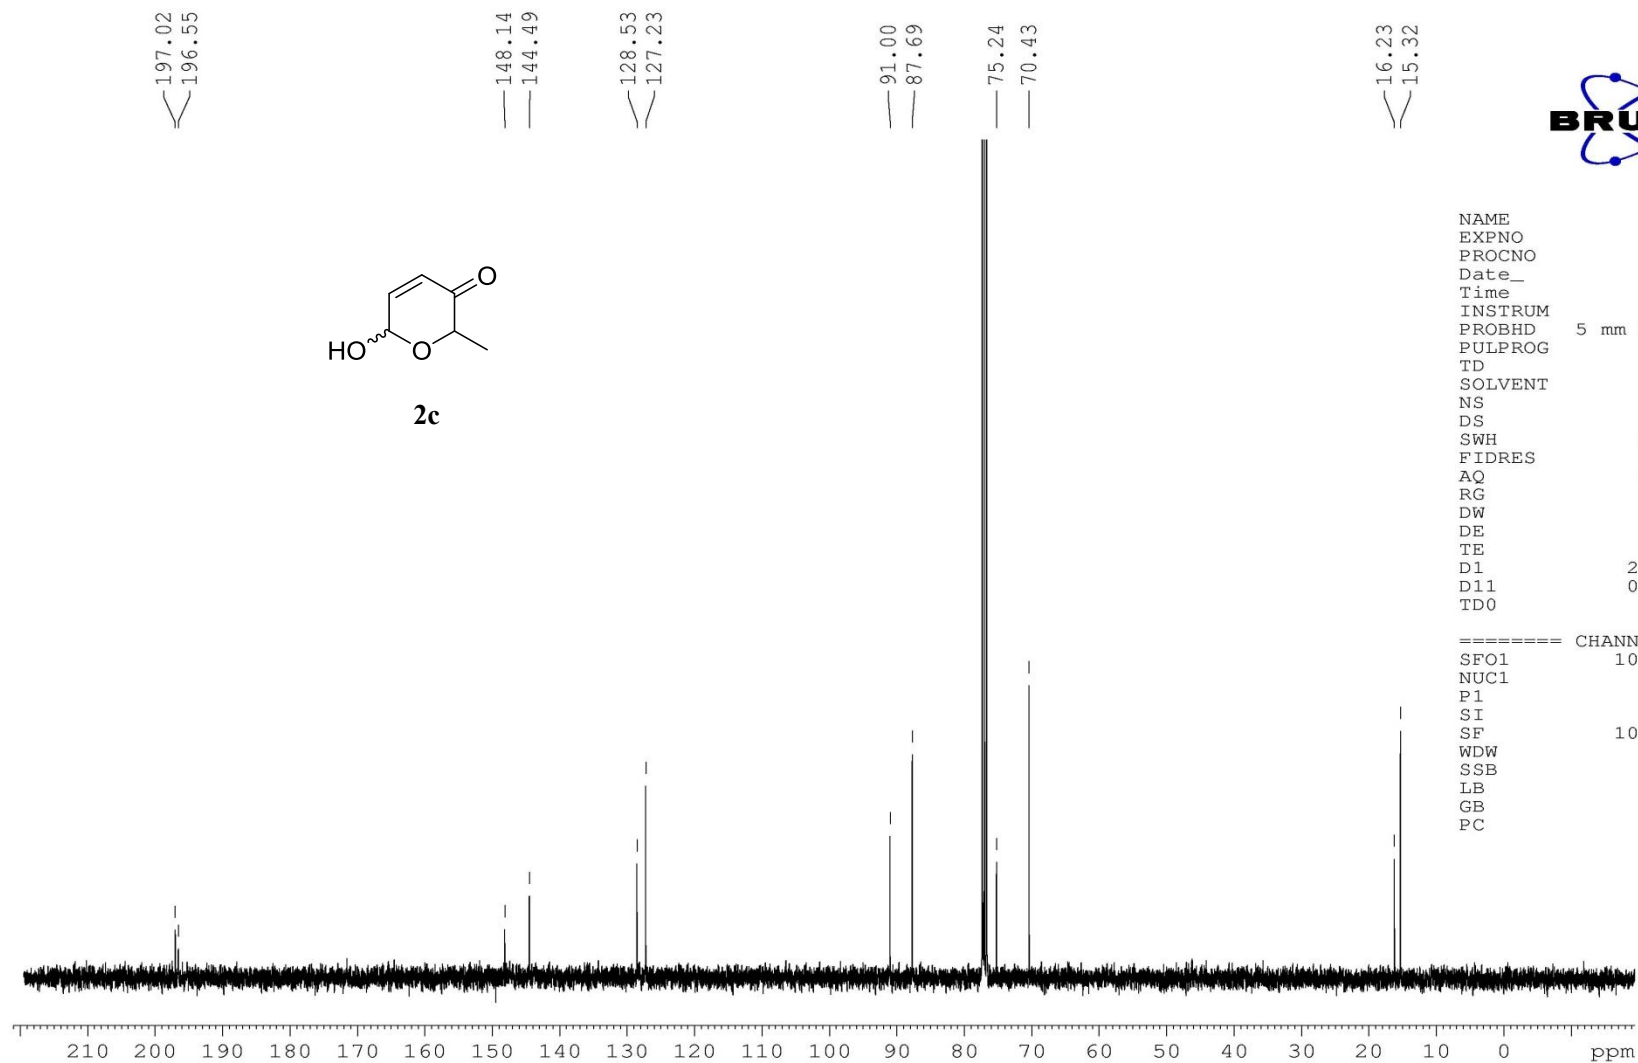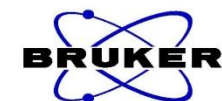

```

NAME                zgp117
EXPNO                2
PROCNO              1
Date_               20180713
Time                20.24
INSTRUM             spect
PROBHD              5 mm DUL 13C-1
PULPROG             zgpg30
TD                  65536
SOLVENT             CDC13
NS                  123
DS                  0
SWH                 24038.461 Hz
FIDRES              0.366798 Hz
AQ                  1.3631988 sec
RG                  196.92
DW                  20.800 usec
DE                  6.50 usec
TE                  296.6 K
D1                  2.00000000 sec
D11                 0.03000000 sec
TD0                 1
  
```

```

===== CHANNEL f1 =====
SF01                 100.6228298 MHz
NUC1                 13C
P1                   9.60 usec
SI                   32768
SF                   100.6127690 MHz
WDW                  EM
SSB                  0
LB                   1.00 Hz
GB                   0
PC                   1.40
  
```



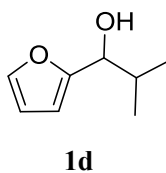

7.3581

6.3289  
6.3235  
6.3179  
6.2217  
6.2139

4.3749  
4.3645  
4.3589  
4.3489

2.1228  
2.1058  
2.0889  
2.0719  
1.9779  
1.9683

1.0192  
1.0025  
0.8586  
0.8417

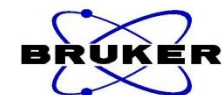

NAME zgo95  
EXPNO 1  
PROCNO 1  
Date\_ 20180320  
Time 23.37  
INSTRUM spect  
PROBHD 5 mm DUL 13C-1  
PULPROG zg30  
TD 65536  
SOLVENT CDCl3  
NS 3  
DS 2  
SWH 8012.820 Hz  
FIDRES 0.122266 Hz  
AQ 4.0894966 sec  
RG 70.97  
DW 62.400 usec  
DE 6.50 usec  
TE 296.1 K  
D1 1.00000000 sec  
TD0 1

===== CHANNEL f1 =====  
SFO1 400.1324710 MHz  
NUC1 1H  
P1 14.30 usec  
SI 65536  
SF 400.1300106 MHz  
WDW EM  
SSB 0  
LB 0.30 Hz  
GB 0  
PC 1.00

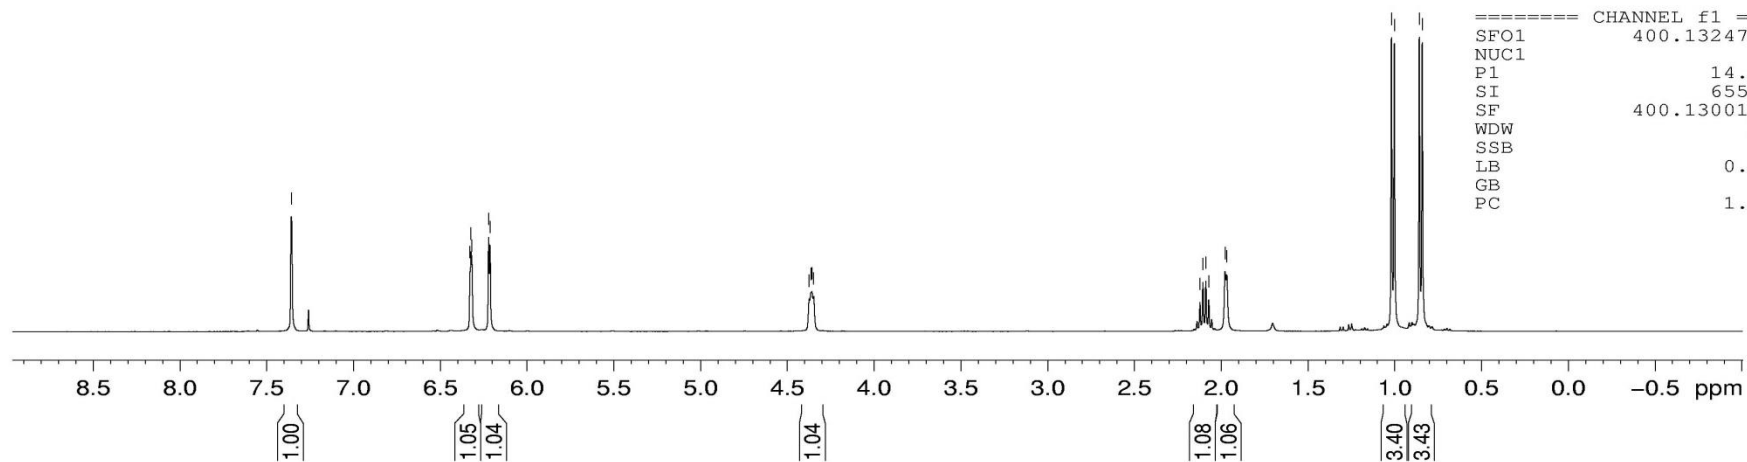

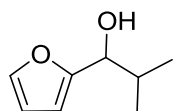

**1d**

—156.28

—141.79

—110.14

—106.58

—73.62

—33.45

18.81  
18.35

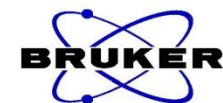

```

NAME                zgo95
EXPNO                2
PROCNO              1
Date_               20180320
Time                23.40
INSTRUM             spect
PROBHD              5 mm DUL 13C-1
PULPROG             zgpg30
TD                  65536
SOLVENT             CDC13
NS                   29
DS                   2
SWH                 24038.461 Hz
FIDRES              0.366798 Hz
AQ                  1.3631988 sec
RG                   196.92
DW                   20.800 usec
DE                   6.50 usec
TE                   296.5 K
D1                   2.00000000 sec
D11                  0.03000000 sec
TD0                  1
  
```

```

===== CHANNEL f1 =====
SFO1                100.6228298 MHz
NUC1                 13C
P1                    9.60 usec
SI                   32768
SF                   100.6127585 MHz
WDW                  EM
SSB                   0
LB                    1.00 Hz
GB                     0
PC                     1.40
  
```

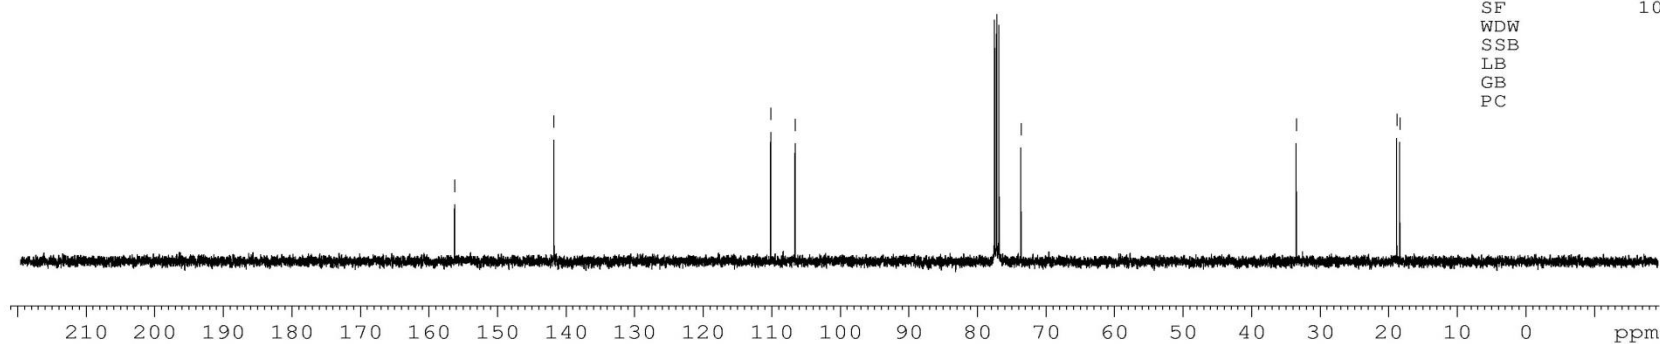

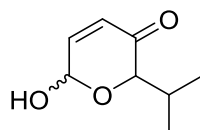

2d

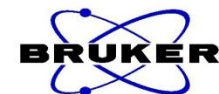

```

NAME                zgo99-1
EXPNO                1
PROCNO               1
Date_                20180323
Time                18.05
INSTRUM              spect
PROBHD               5 mm DUL 13C-1
PULPROG              zg30
TD                   65536
SOLVENT              CDCl3
NS                    8
DS                    2
SWH                  8012.820 Hz
FIDRES               0.122266 Hz
AQ                   4.0894966 sec
RG                    88.84
DW                   62.400 usec
DE                    6.50 usec
TE                   294.7 K
D1                   1.00000000 sec
TD0                  1

===== CHANNEL f1 =====
SFO1                 400.1324710 MHz
NUC1                  1H
P1                    14.30 usec
SI                    65536
SF                   400.1300106 MHz
WDW                   EM
SSB                    0
LB                    0.30 Hz
GB                    0
PC                     1.00
  
```

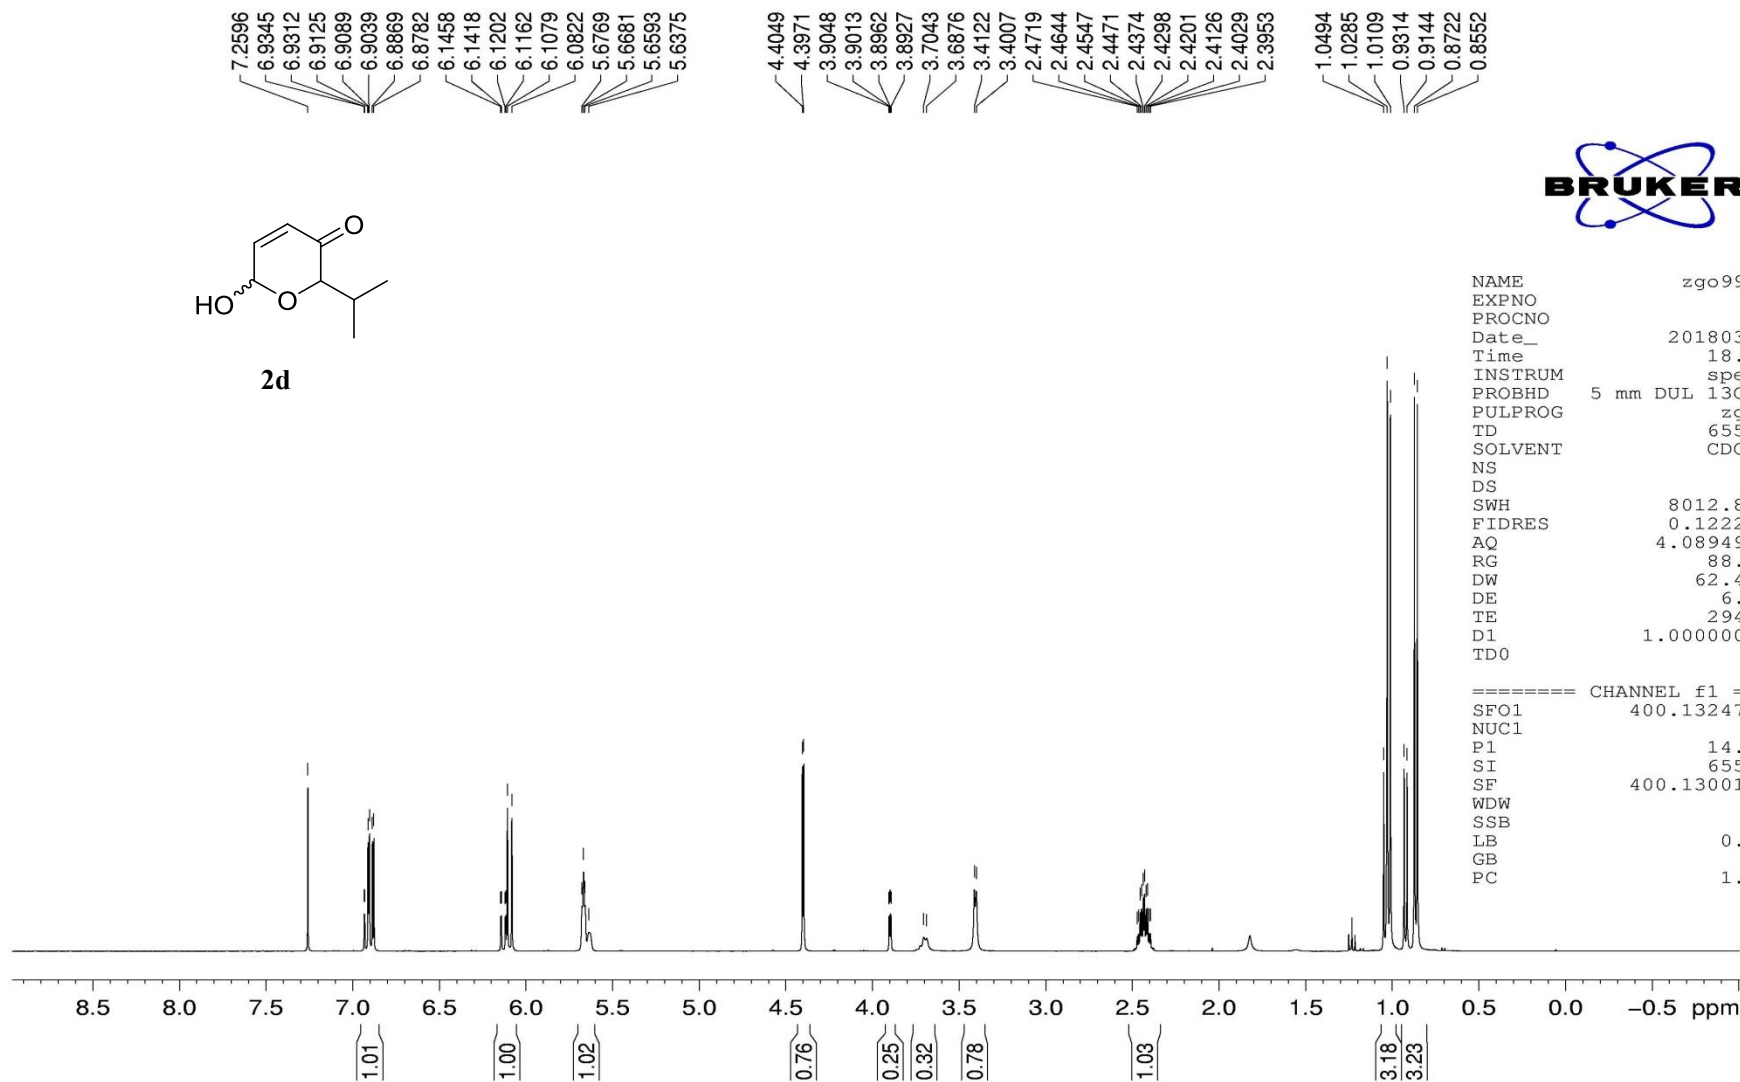

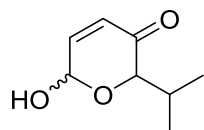

**2d**

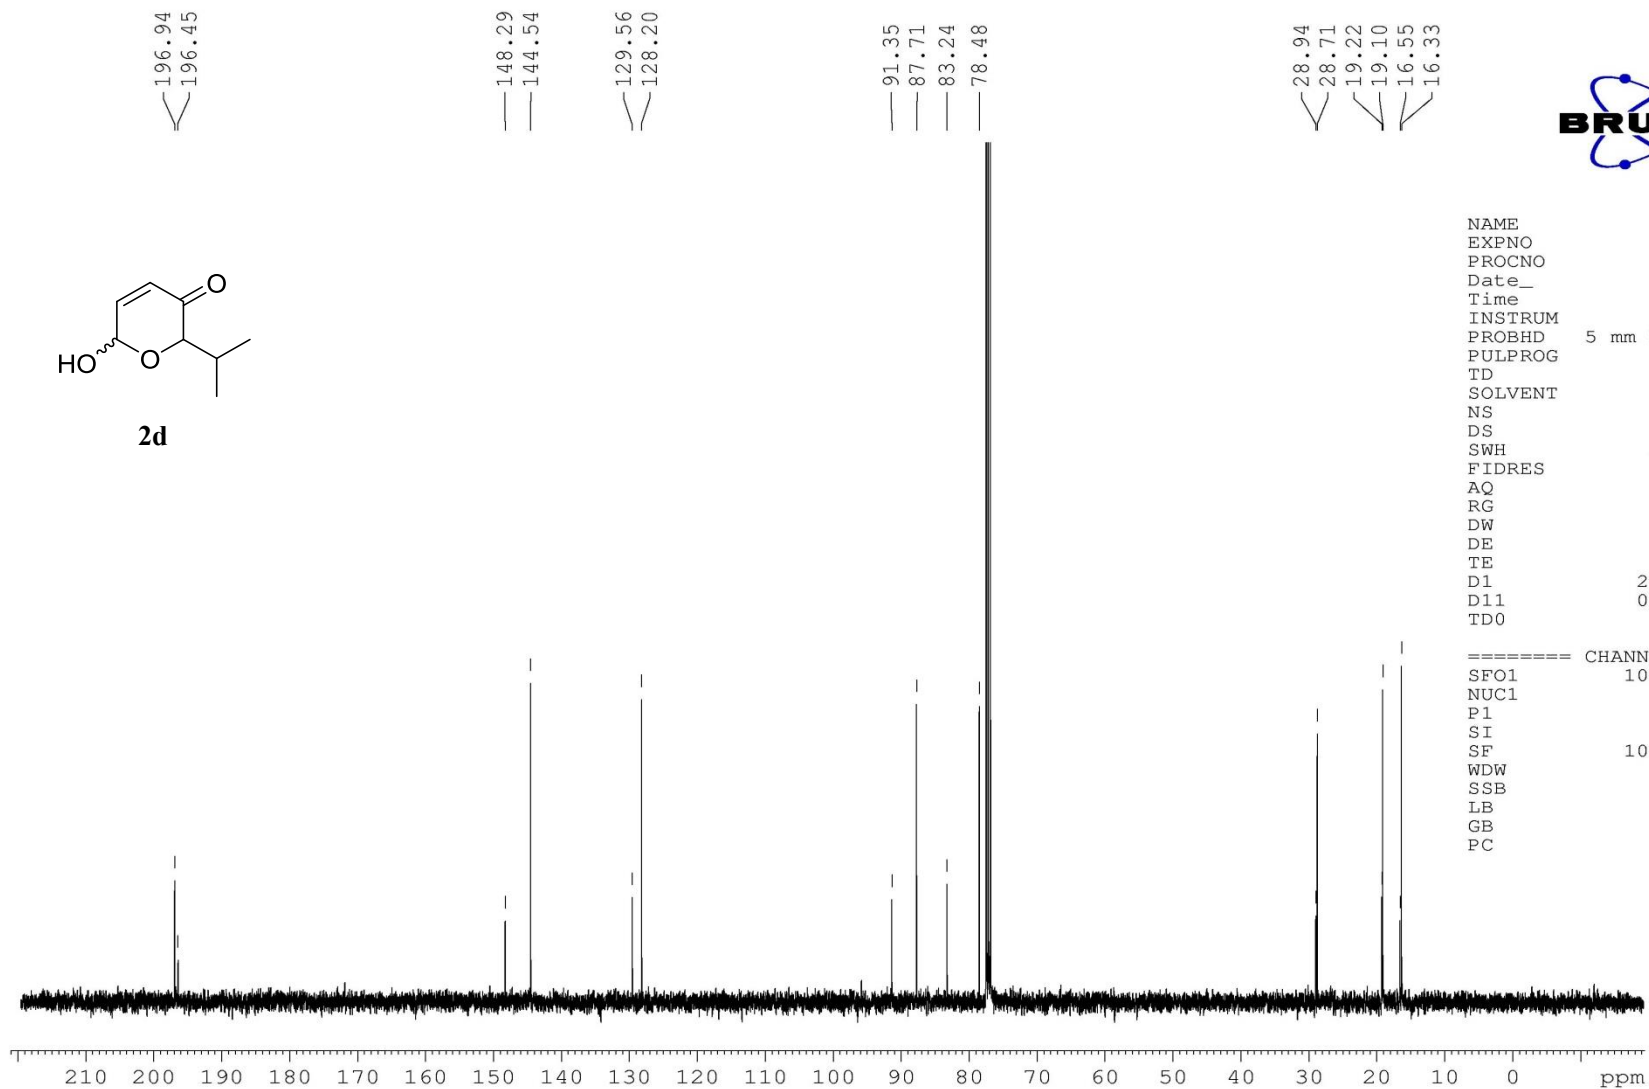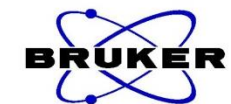

```

NAME          zgo99-1
EXPNO          2
PROCNO         1
Date_          20180323
Time           18.13
INSTRUM        spect
PROBHD         5 mm DUL 13C-1
PULPROG        zgpg30
TD             65536
SOLVENT        CDC13
NS             141
DS             2
SWH            24038.461 Hz
FIDRES         0.366798 Hz
AQ            1.3631988 sec
RG            196.92
DW            20.800 usec
DE            6.50 usec
TE            295.4 K
D1            2.00000000 sec
D11           0.03000000 sec
TD0           1
  
```

```

===== CHANNEL f1 =====
SFO1          100.6228298 MHz
NUC1           13C
P1            9.60 usec
SI            32768
SF            100.6127588 MHz
WDW            EM
SSB            0
LB            1.00 Hz
GB            0
PC            1.40
  
```

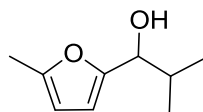

1e

6.0890  
6.0814  
5.8961  
5.8938  
5.8912  
5.8886  
5.8864

4.2856  
4.2674

2.2857  
2.2719  
2.2707  
2.1248  
2.1078  
2.0907  
2.0734  
2.0563  
2.0393

1.0313  
1.0146  
0.8619  
0.8450

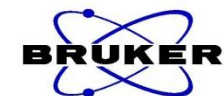

```

NAME                zgp88-1
EXPNO                1
PROCNO              1
Date_               20180625
Time                14.25
INSTRUM             spect
PROBHD              5 mm DUL 13C-1
PULPROG             zg30
TD                  65536
SOLVENT             CDC13
NS                   2
DS                   0
SWH                 8012.820 Hz
FIDRES              0.122266 Hz
AQ                  4.0894966 sec
RG                   126.97
DW                   62.400 usec
DE                    6.50 usec
TE                   296.2 K
D1                   1.00000000 sec
TD0                  1
  
```

```

===== CHANNEL f1 =====
SFO1              400.1324710 MHz
NUC1               1H
P1                 14.30 usec
SI                 65536
SF                 400.1300103 MHz
WDW                EM
SSB                 0
LB                  0.30 Hz
GB                  0
PC                  1.00
  
```

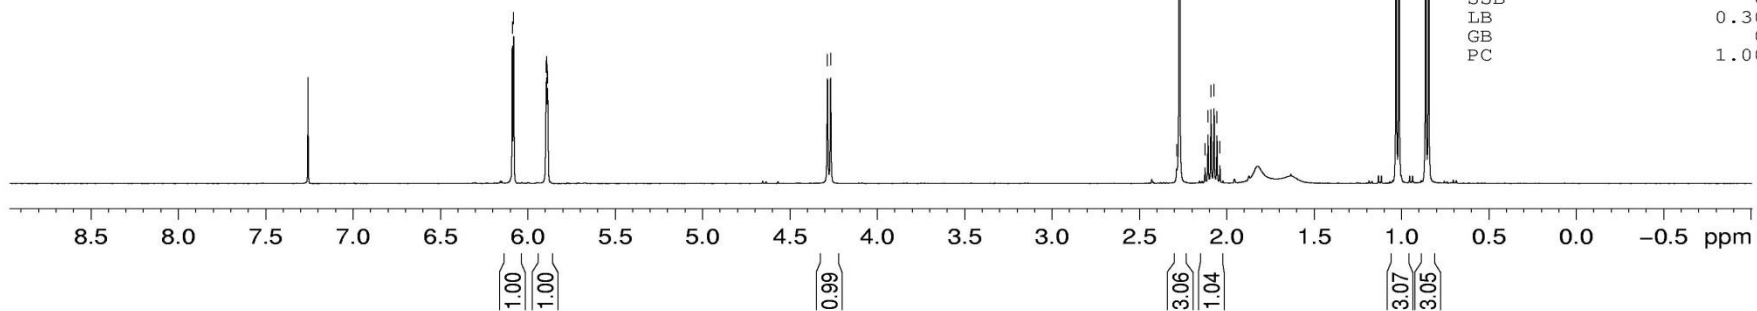

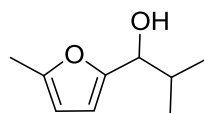

1e

154.39  
151.53

107.47  
106.00

73.75

33.29

19.04  
18.50  
13.68

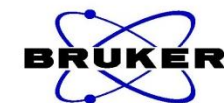

```

NAME          zgp88-1
EXPNO          2
PROCNO         1
Date_          20180625
Time           14.27
INSTRUM        spect
PROBHD         5 mm DUL 13C-1
PULPROG        zgpg30
TD             65536
SOLVENT        CDCl3
NS             56
DS             0
SWH            24038.461 Hz
FIDRES         0.366798 Hz
AQ            1.3631988 sec
RG            196.92
DW            20.800 usec
DE            6.50 usec
TE            296.6 K
D1            2.00000000 sec
D11           0.03000000 sec
TD0           1
  
```

```

===== CHANNEL f1 =====
SFO1          100.6228298 MHz
NUC1           13C
P1            9.60 usec
SI            32768
SF            100.6127564 MHz
WDW           EM
SSB           0
LB            1.00 Hz
GB            0
PC            1.40
  
```

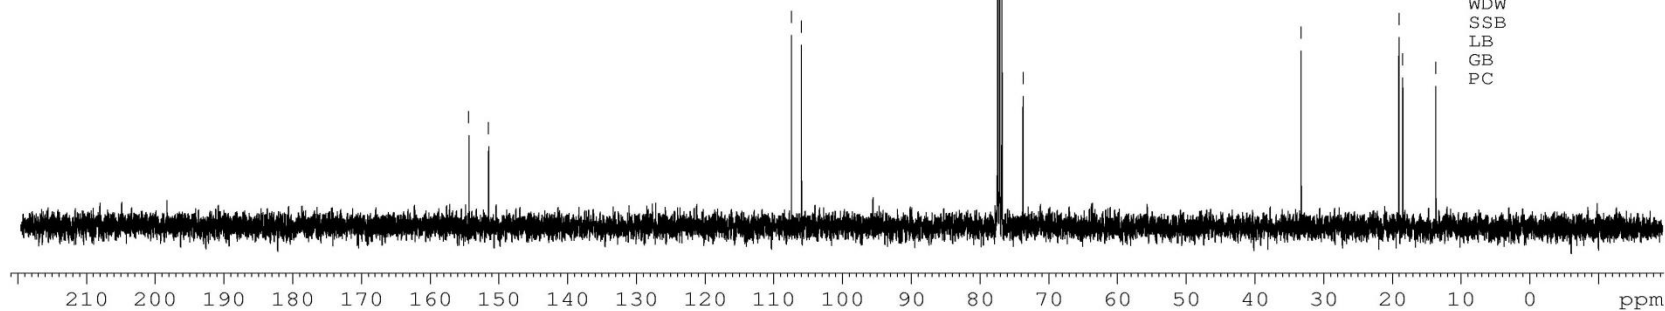

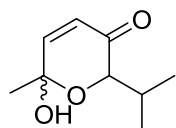

2e

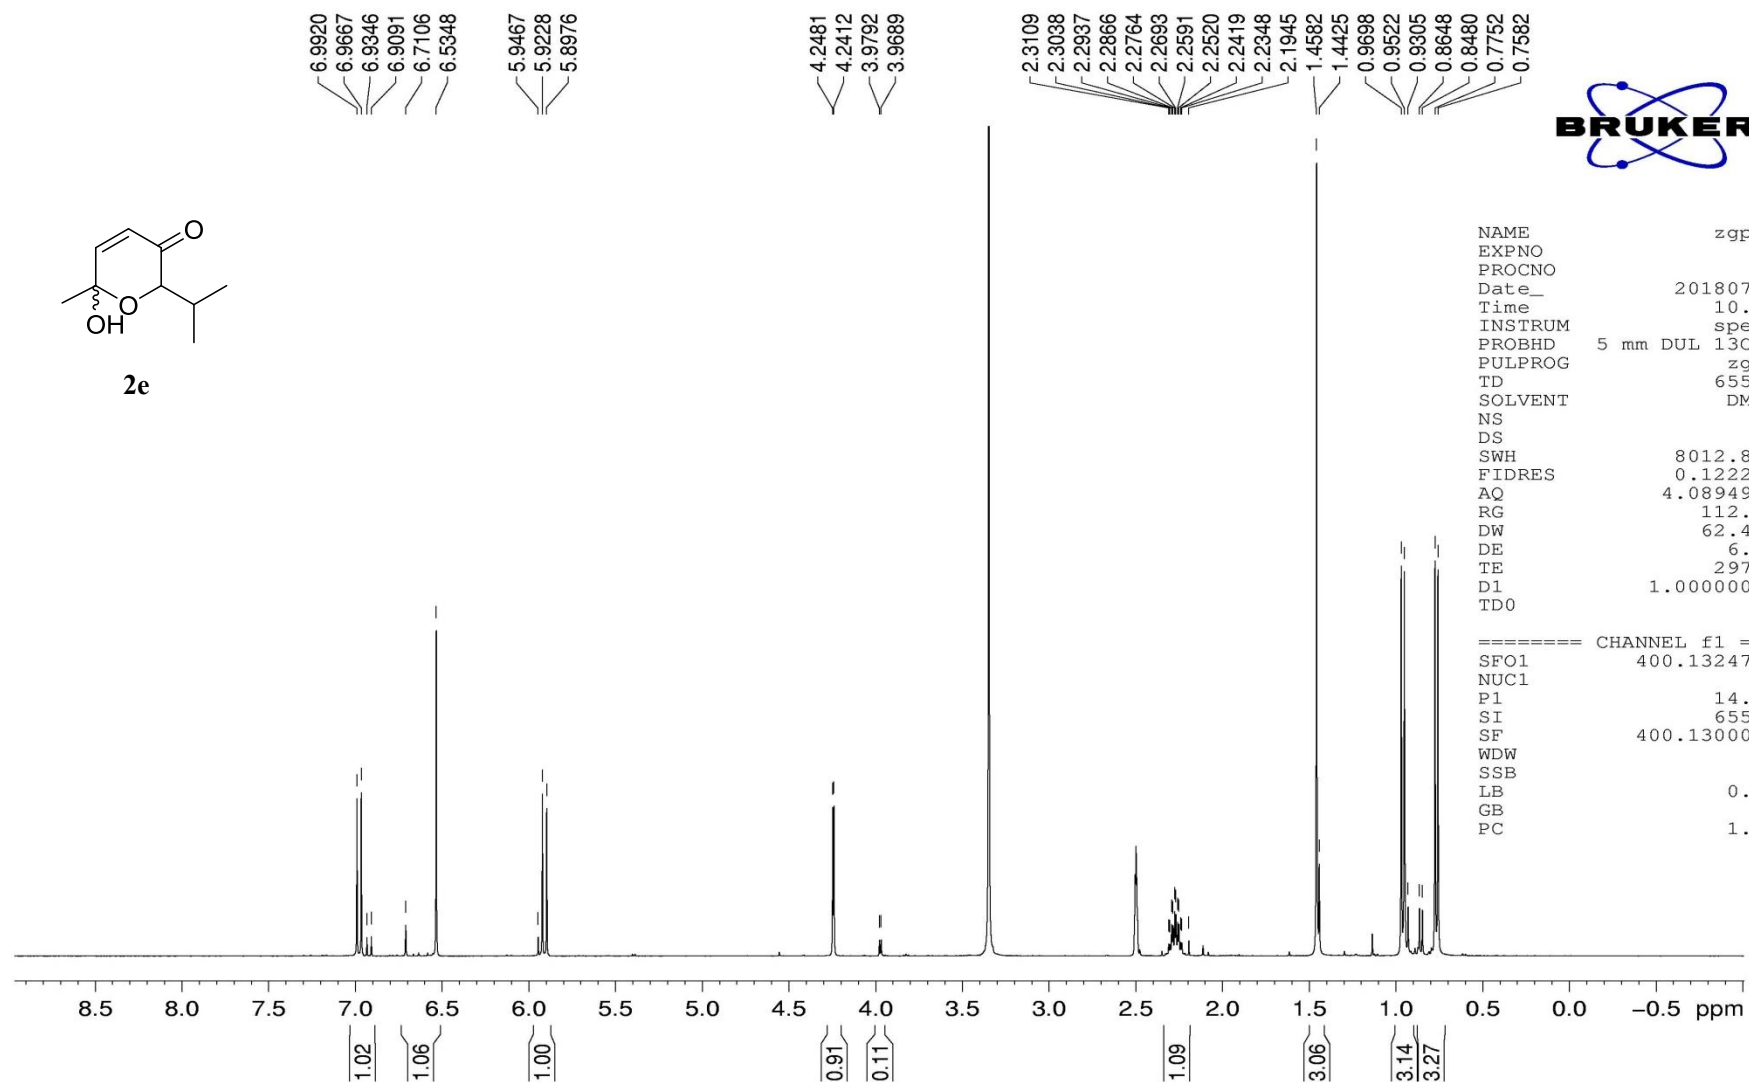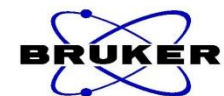

```

NAME                zgp93
EXPNO                3
PROCNO              1
Date_               20180706
Time                10.01
INSTRUM             spect
PROBHD              5 mm DUL 13C-1
PULPROG             zg30
TD                  65536
SOLVENT             DMSO
NS                   3
DS                   0
SWH                  8012.820 Hz
FIDRES              0.122266 Hz
AQ                   4.0894966 sec
RG                   112.31
DW                   62.400 usec
DE                   6.50 usec
TE                   297.8 K
D1                   1.00000000 sec
TD0                  1

===== CHANNEL f1 =====
SFO1                 400.1324710 MHz
NUC1                  1H
P1                    14.30 usec
SI                   65536
SF                   400.1300036 MHz
WDW                   EM
SSB                   0
LB                   0.30 Hz
GB                   0
PC                   1.00
  
```

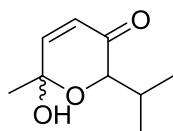

2e

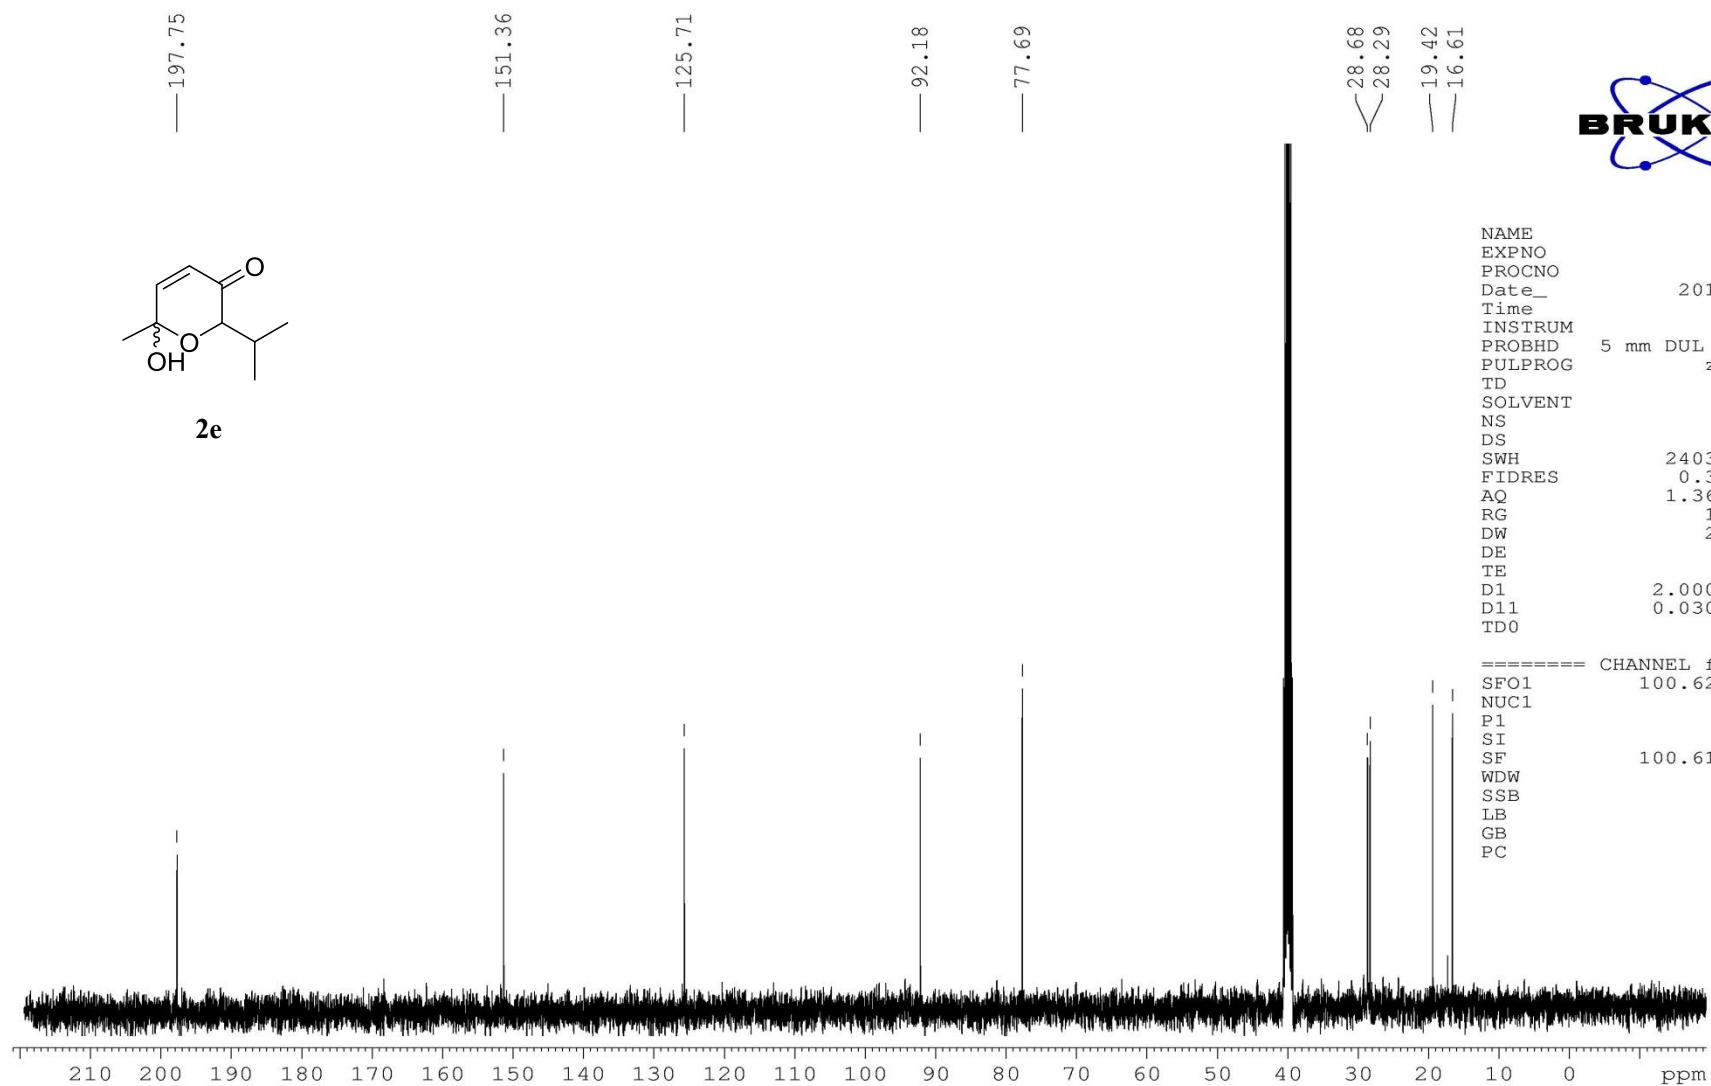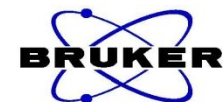

```

NAME                zgp93
EXPNO                4
PROCNO               1
Date_                20180706
Time                10.03
INSTRUM              spect
PROBHD               5 mm DUL 13C-1
PULPROG              zgpg30
TD                   65536
SOLVENT              DMSO
NS                   70
DS                   0
SWH                  24038.461 Hz
FIDRES               0.366798 Hz
AQ                   1.3631988 sec
RG                   196.92
DW                   20.800 usec
DE                   6.50 usec
TE                   298.2 K
D1                   2.00000000 sec
D11                  0.03000000 sec
TD0                  1
  
```

```

===== CHANNEL f1 =====
SFO1                100.6228298 MHz
NUC1                 13C
P1                   9.60 usec
SI                   32768
SF                  100.6127690 MHz
WDW                  EM
SSB                  0
LB                   1.00 Hz
GB                   0
PC                   1.40
  
```



7.3843  
7.3826  
7.3799  
6.3408  
6.3361  
6.3327  
6.3282  
6.2590  
6.2509  
5.8627  
5.8449  
5.8372  
5.8273  
5.8197  
5.8020  
5.7944  
5.7844  
5.7767  
5.7590  
5.2126  
5.2086  
5.2049  
5.1689  
5.1659  
5.1407  
5.1386  
4.7720  
4.7552  
4.7394

2.6527  
2.6494  
2.6466  
2.6430  
2.6381  
2.6354  
2.6315  
2.6285  
2.6254  
2.6210  
2.6105

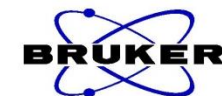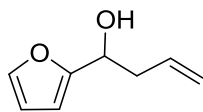

1f

NAME ZGP38  
EXPNO 2  
PROCNO 1  
Date\_ 20180604  
Time 16.07  
INSTRUM spect  
PROBHD 5 mm DUL 13C-1  
PULPROG zg30  
TD 65536  
SOLVENT CDC13  
NS 4  
DS 0  
SWH 8012.820 Hz  
FIDRES 0.122266 Hz  
AQ 4.0894966 sec  
RG 196.92  
DW 62.400 usec  
DE 6.50 usec  
TE 296.7 K  
D1 1.00000000 sec  
TD0 1

===== CHANNEL f1 =====  
SFO1 400.1324710 MHz  
NUC1 1H  
P1 14.30 usec  
SI 65536  
SF 400.1300098 MHz  
WDW EM  
SSB 0  
LB 0.30 Hz  
GB 0  
PC 1.00

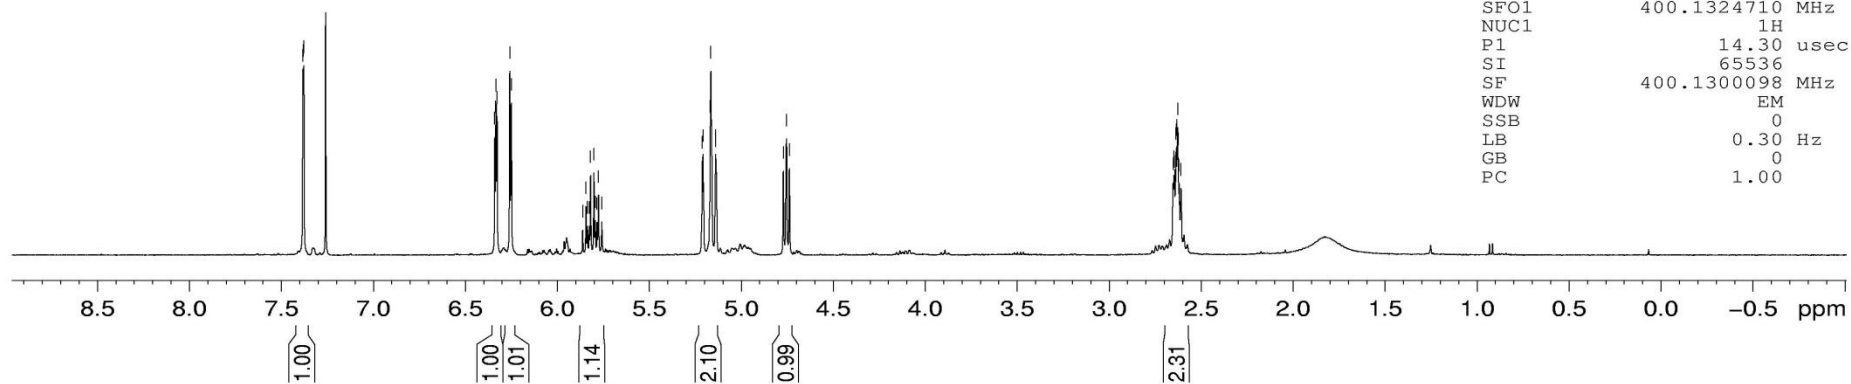

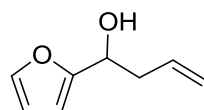

**1f**

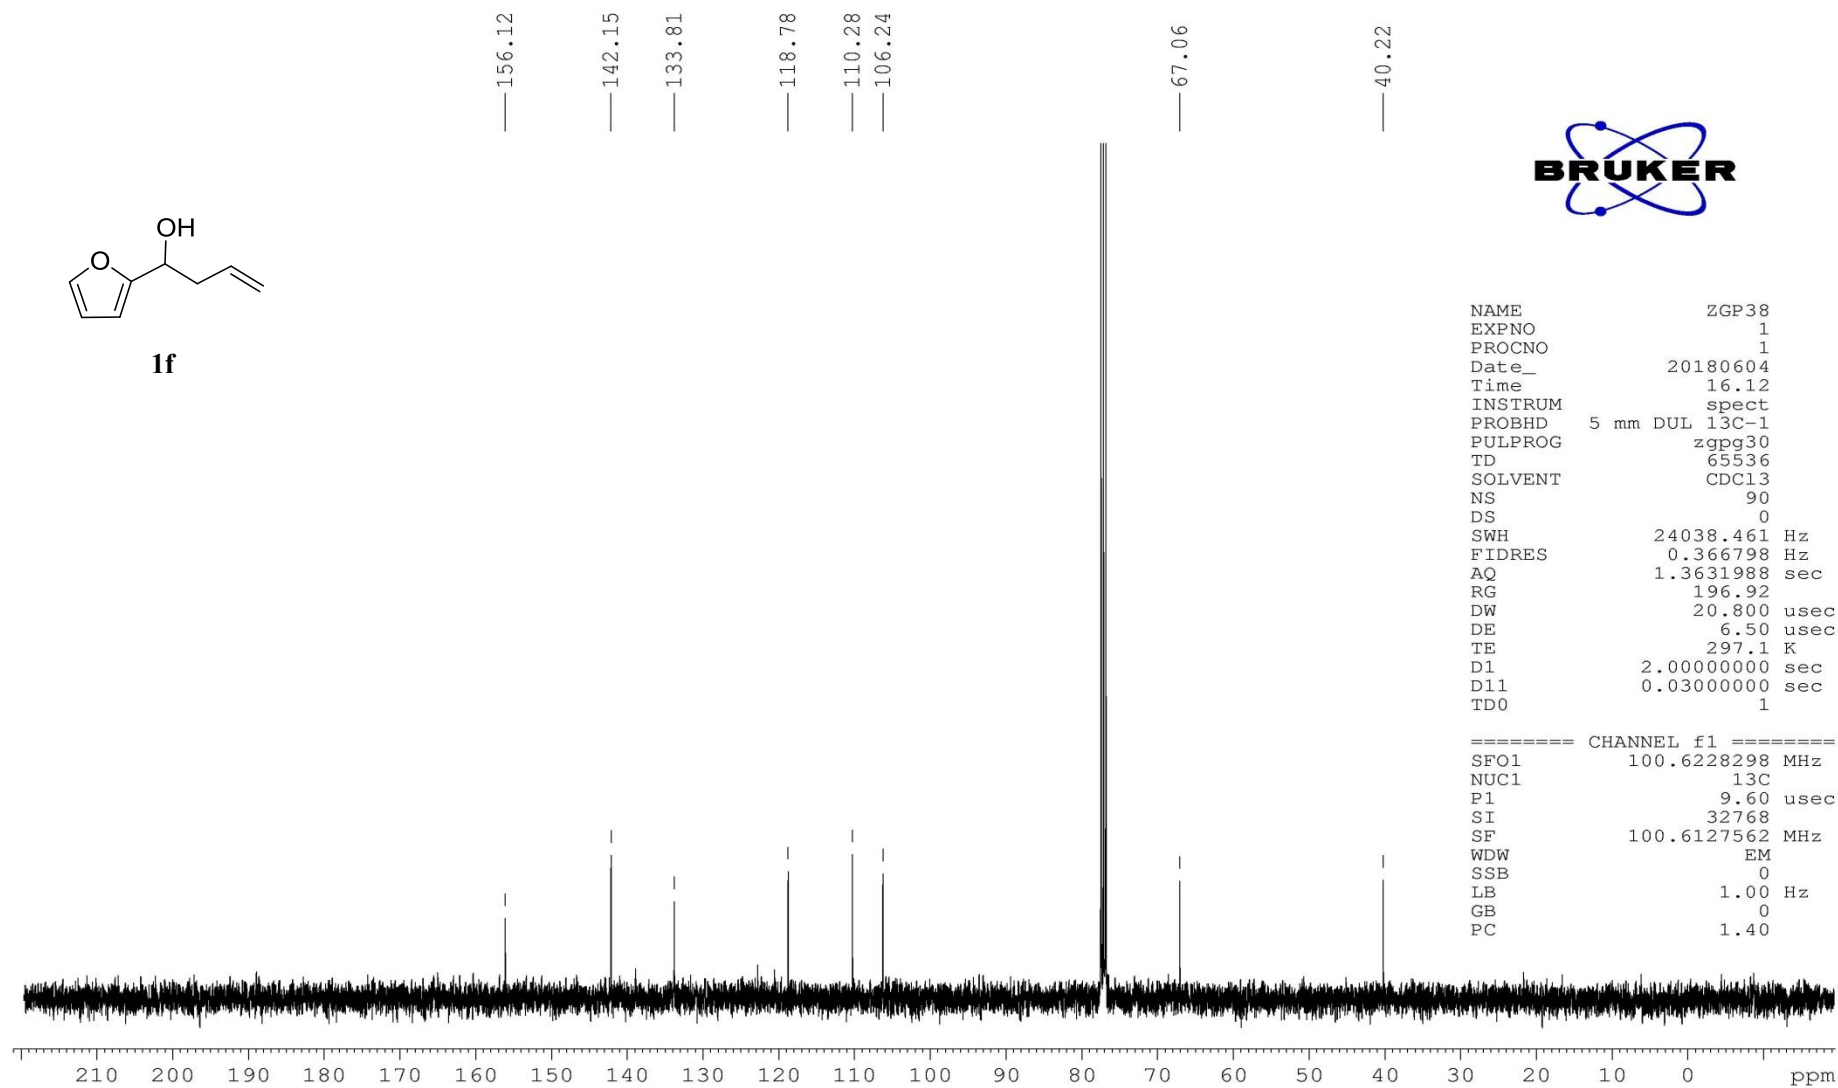

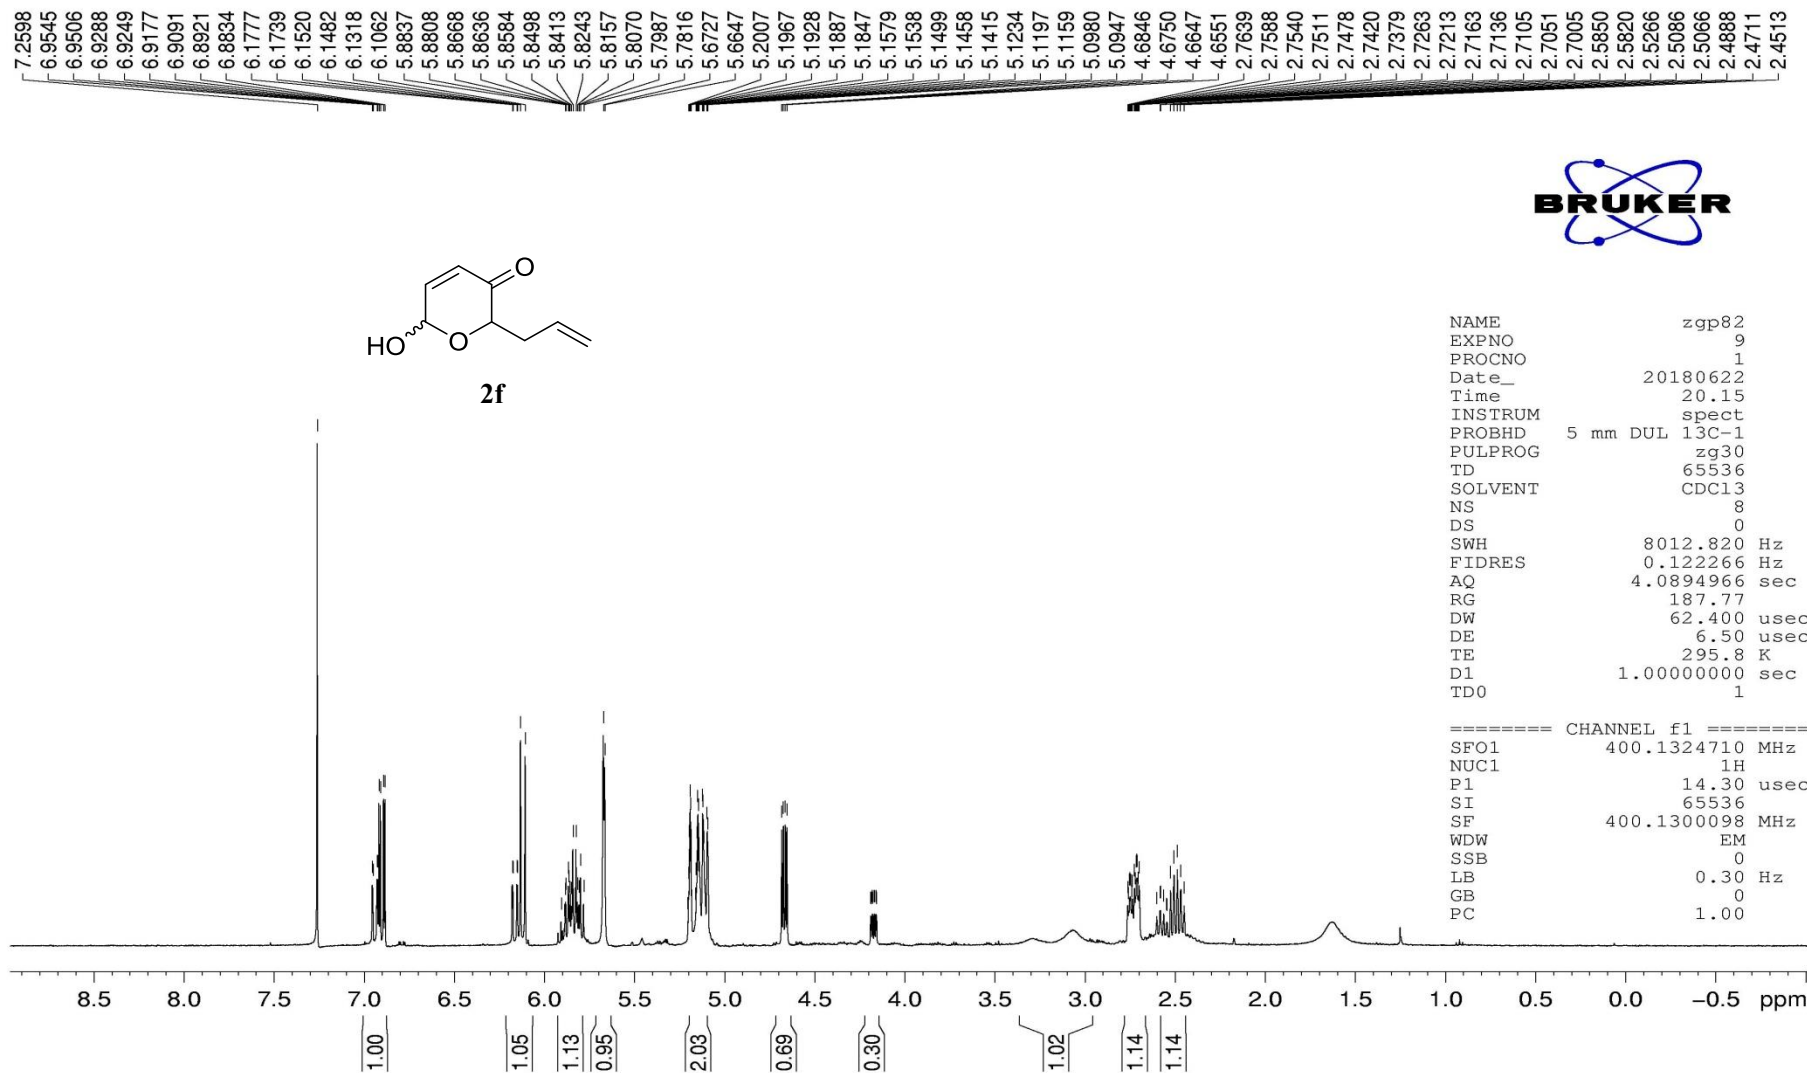

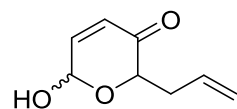

2f

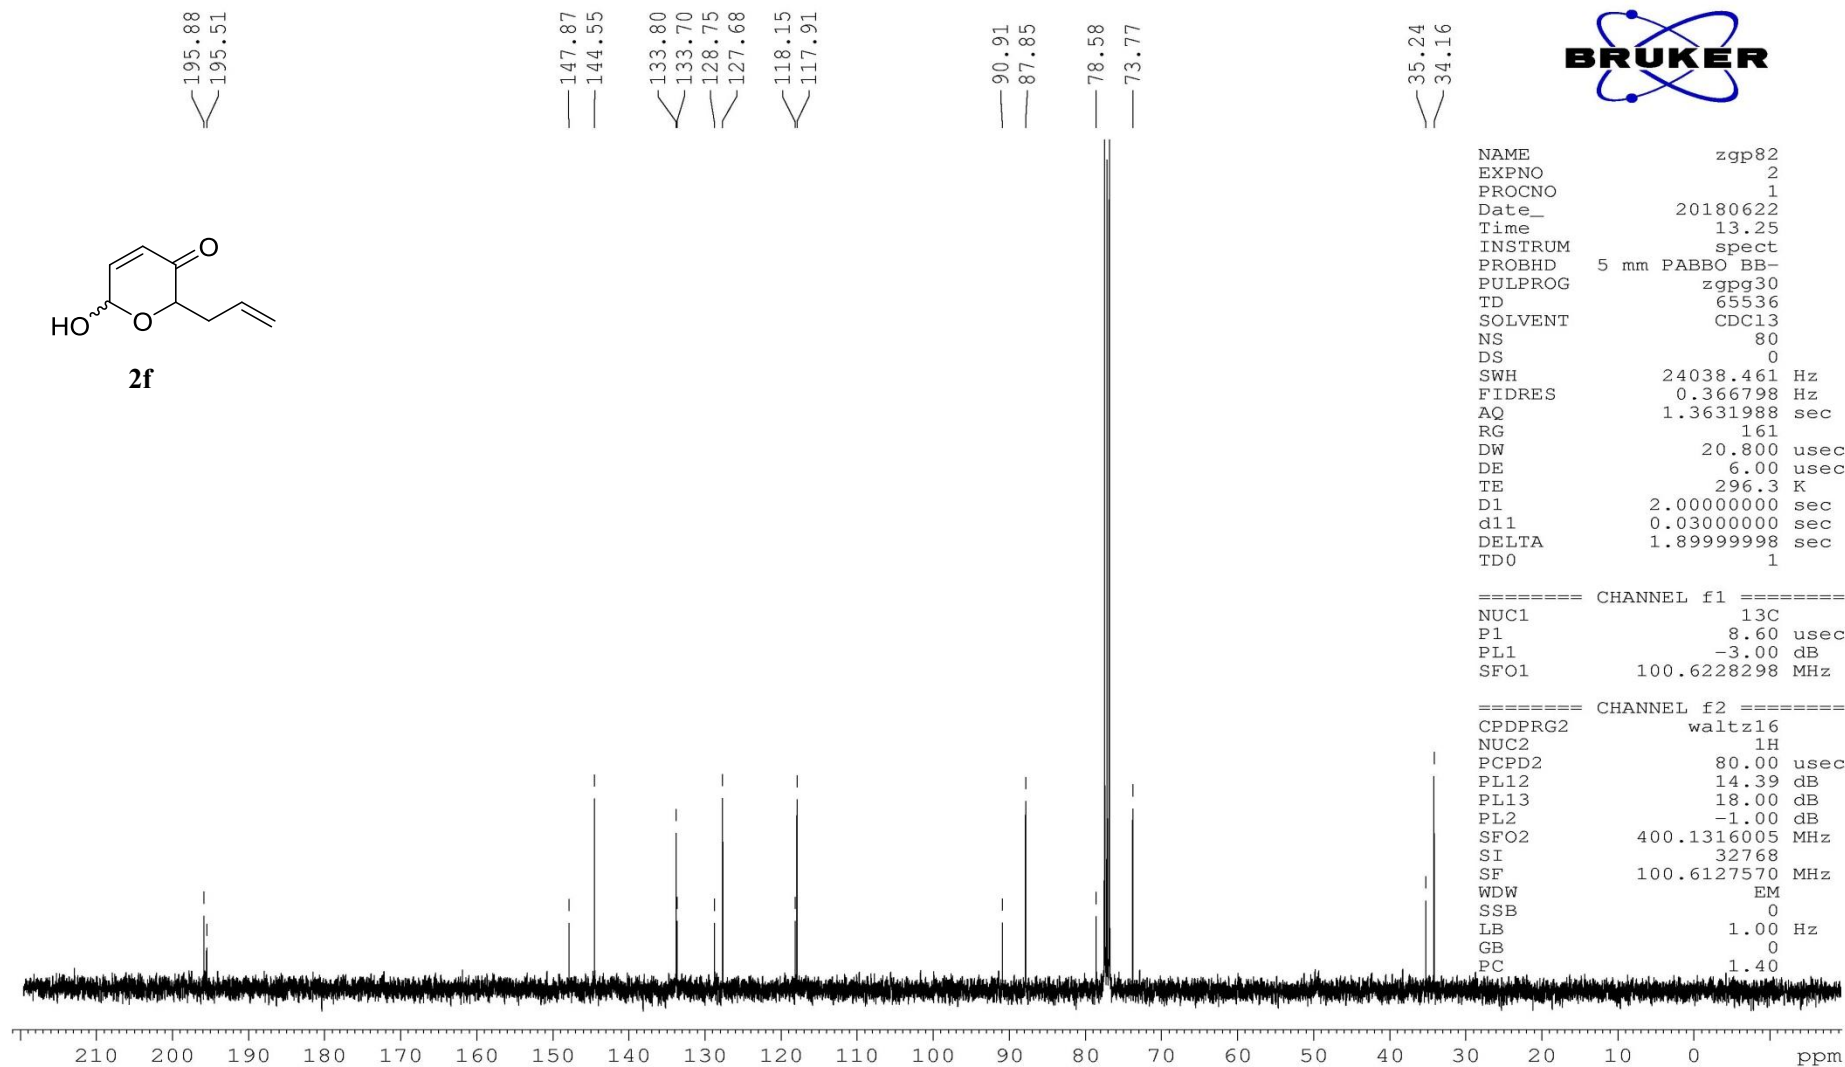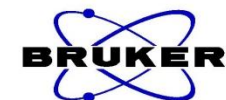

```

NAME                zgp82
EXPNO                2
PROCNO               1
Date_                20180622
Time                13.25
INSTRUM              spect
PROBHD               5 mm PABBO BB-
PULPROG              zgpg30
TD                   65536
SOLVENT              CDC13
NS                    80
DS                    0
SWH                  24038.461 Hz
FIDRES               0.366798 Hz
AQ                   1.3631988 sec
RG                    161
DW                   20.800 usec
DE                    6.00 usec
TE                   296.3 K
D1                   2.00000000 sec
d11                  0.03000000 sec
DELTA                1.89999998 sec
TD0                  1
  
```

```

===== CHANNEL f1 =====
NUC1                  13C
P1                     8.60 usec
PL1                    -3.00 dB
SFO1                  100.6228298 MHz
  
```

```

===== CHANNEL f2 =====
CPDPRG2              waltz16
NUC2                   1H
PCPD2                 80.00 usec
PL12                  14.39 dB
PL13                  18.00 dB
PL2                    -1.00 dB
SFO2                  400.1316005 MHz
SI                     32768
SF                   100.6127570 MHz
WDW                     EM
SSB                      0
LB                      1.00 Hz
GB                      0
PC                      1.40
  
```

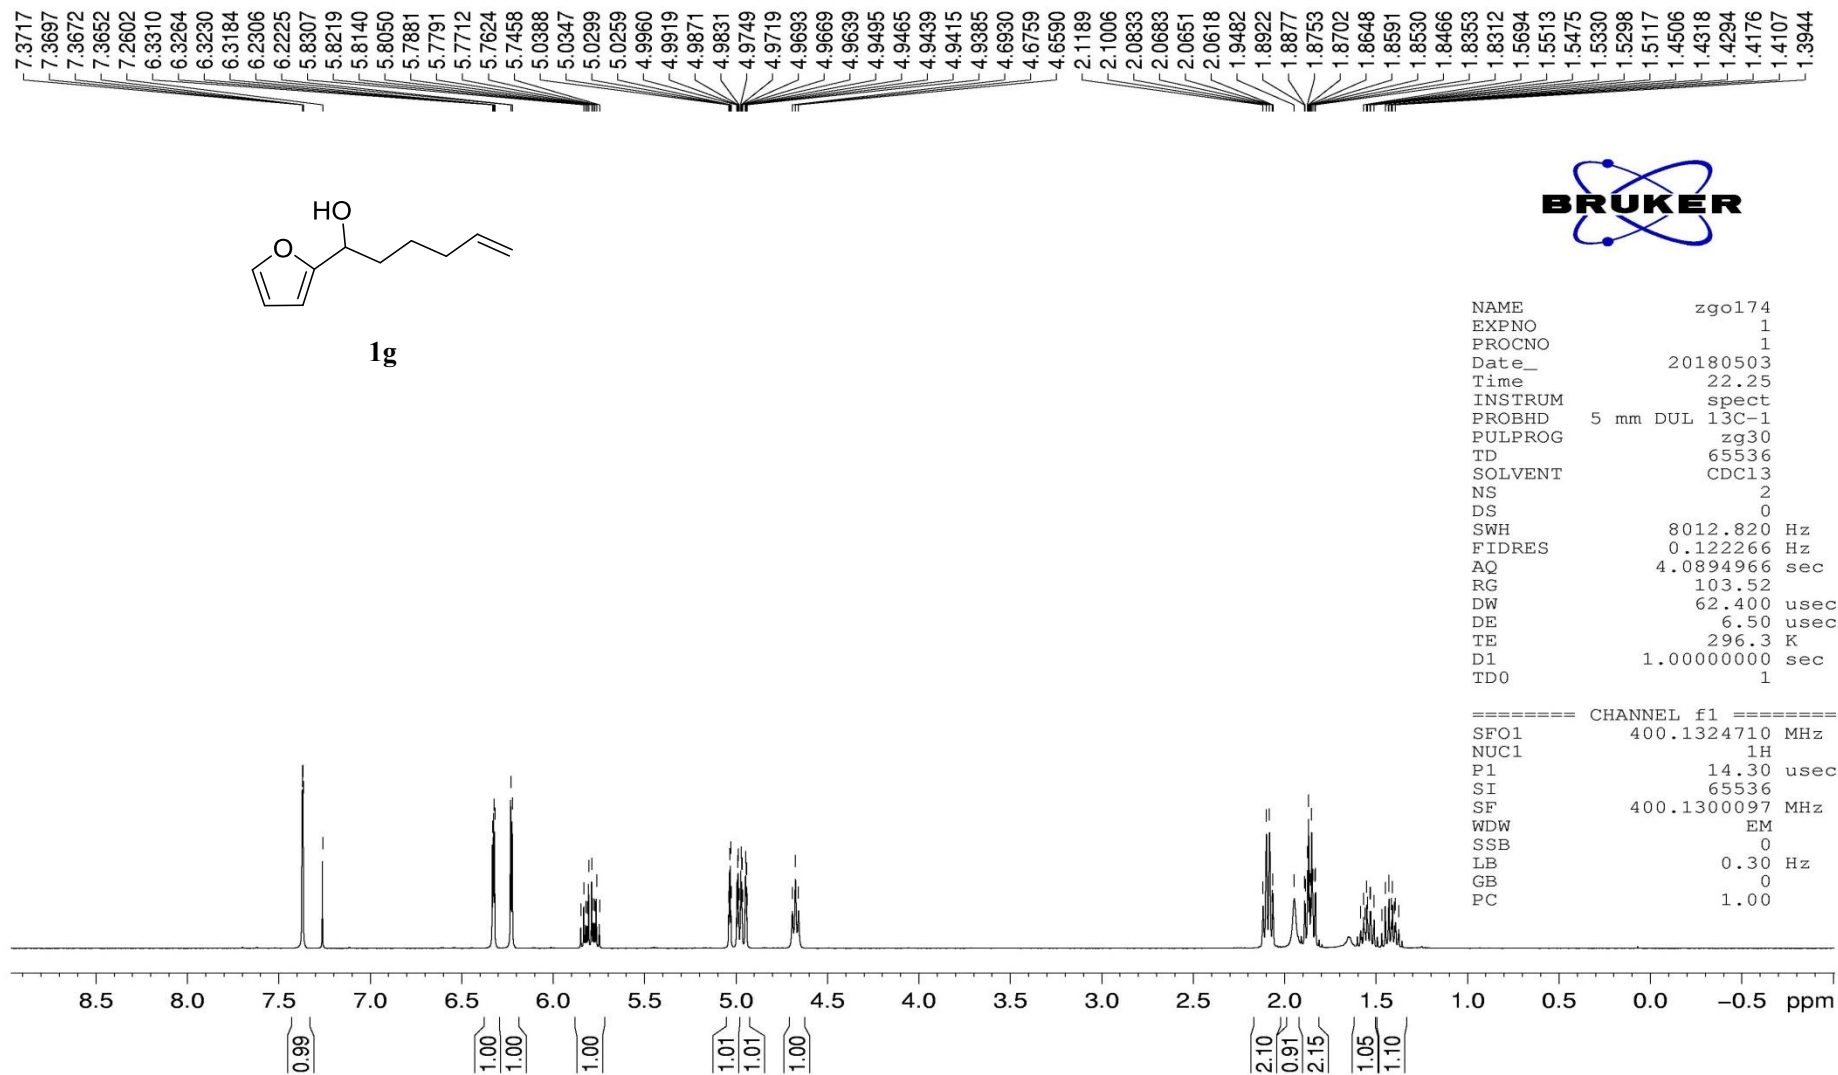

```

NAME                zgo174
EXPNO                1
PROCNO              1
Date_                20180503
Time                22.25
INSTRUM              spect
PROBHD               5 mm DUL 13C-1
PULPROG              zg30
TD                   65536
SOLVENT              CDCl3
NS                    2
DS                    0
SWH                  8012.820 Hz
FIDRES               0.122266 Hz
AQ                   4.0894966 sec
RG                   103.52
DW                   62.400 usec
DE                   6.50 usec
TE                   296.3 K
D1                   1.00000000 sec
TD0                  1

===== CHANNEL f1 =====
SFO1                 400.1324710 MHz
NUC1                  1H
P1                   14.30 usec
SI                   65536
SF                   400.1300097 MHz
WDW                   EM
SSB                   0
LB                   0.30 Hz
GB                   0
PC                   1.00

```

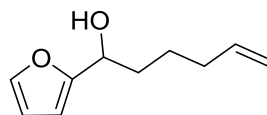

**1g**

—156.87

—142.03  
—138.57

—114.92  
—110.24  
—105.95

—67.81

—35.07  
—33.55  
—24.90

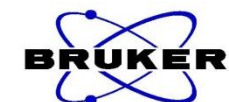

```

NAME          zgo174
EXPNO          2
PROCNO         1
Date_          20180503
Time           22.29
INSTRUM        spect
PROBHD         5 mm DUL 13C-1
PULPROG        zgpg30
TD             65536
SOLVENT        CDCl3
NS             71
DS             0
SWH            24038.461 Hz
FIDRES         0.366798 Hz
AQ            1.3631988 sec
RG            196.92
DW            20.800 usec
DE            6.50 usec
TE            296.9 K
D1            2.00000000 sec
D11           0.03000000 sec
TD0           1
  
```

```

===== CHANNEL f1 =====
SFO1          100.6228298 MHz
NUC1          13C
P1            9.60 usec
SI            32768
SF            100.6127573 MHz
WDW           EM
SSB           0
LB            1.00 Hz
GB            0
PC            1.40
  
```

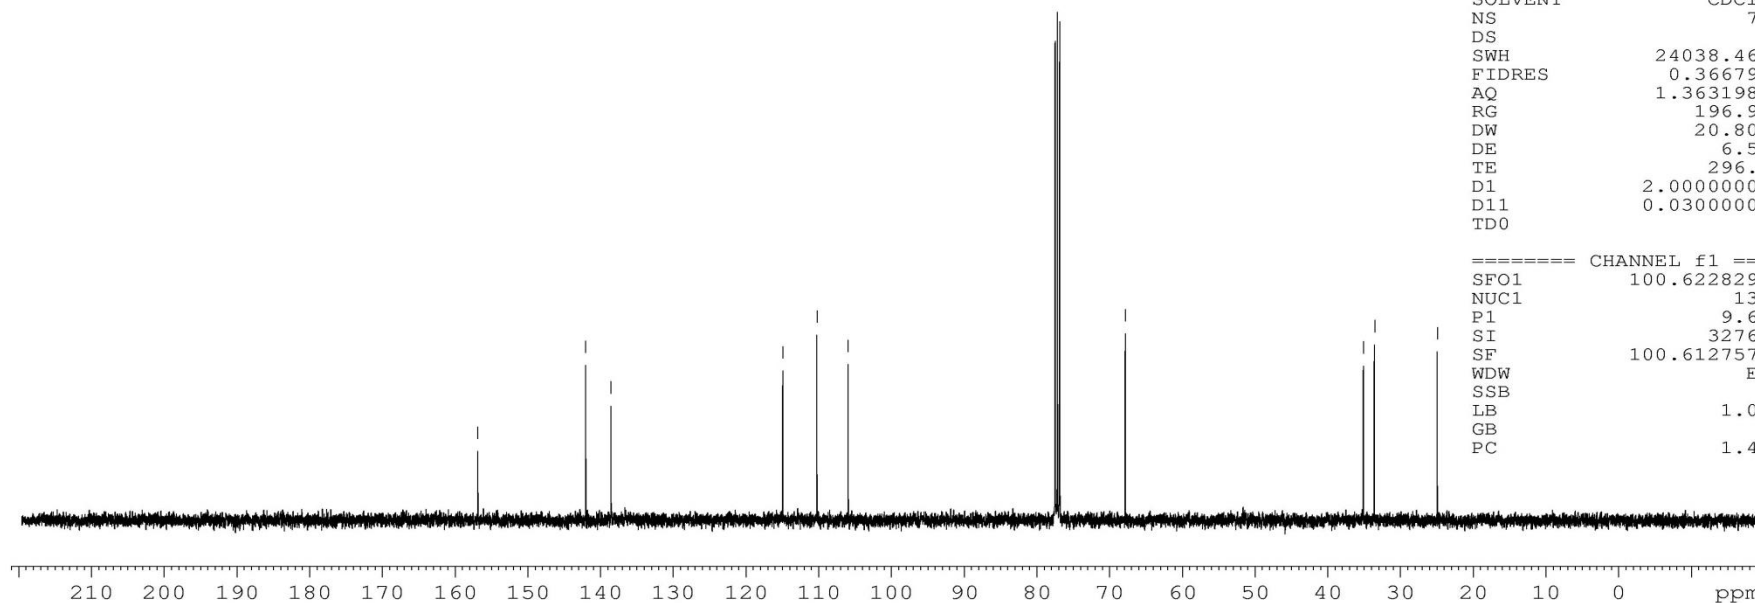

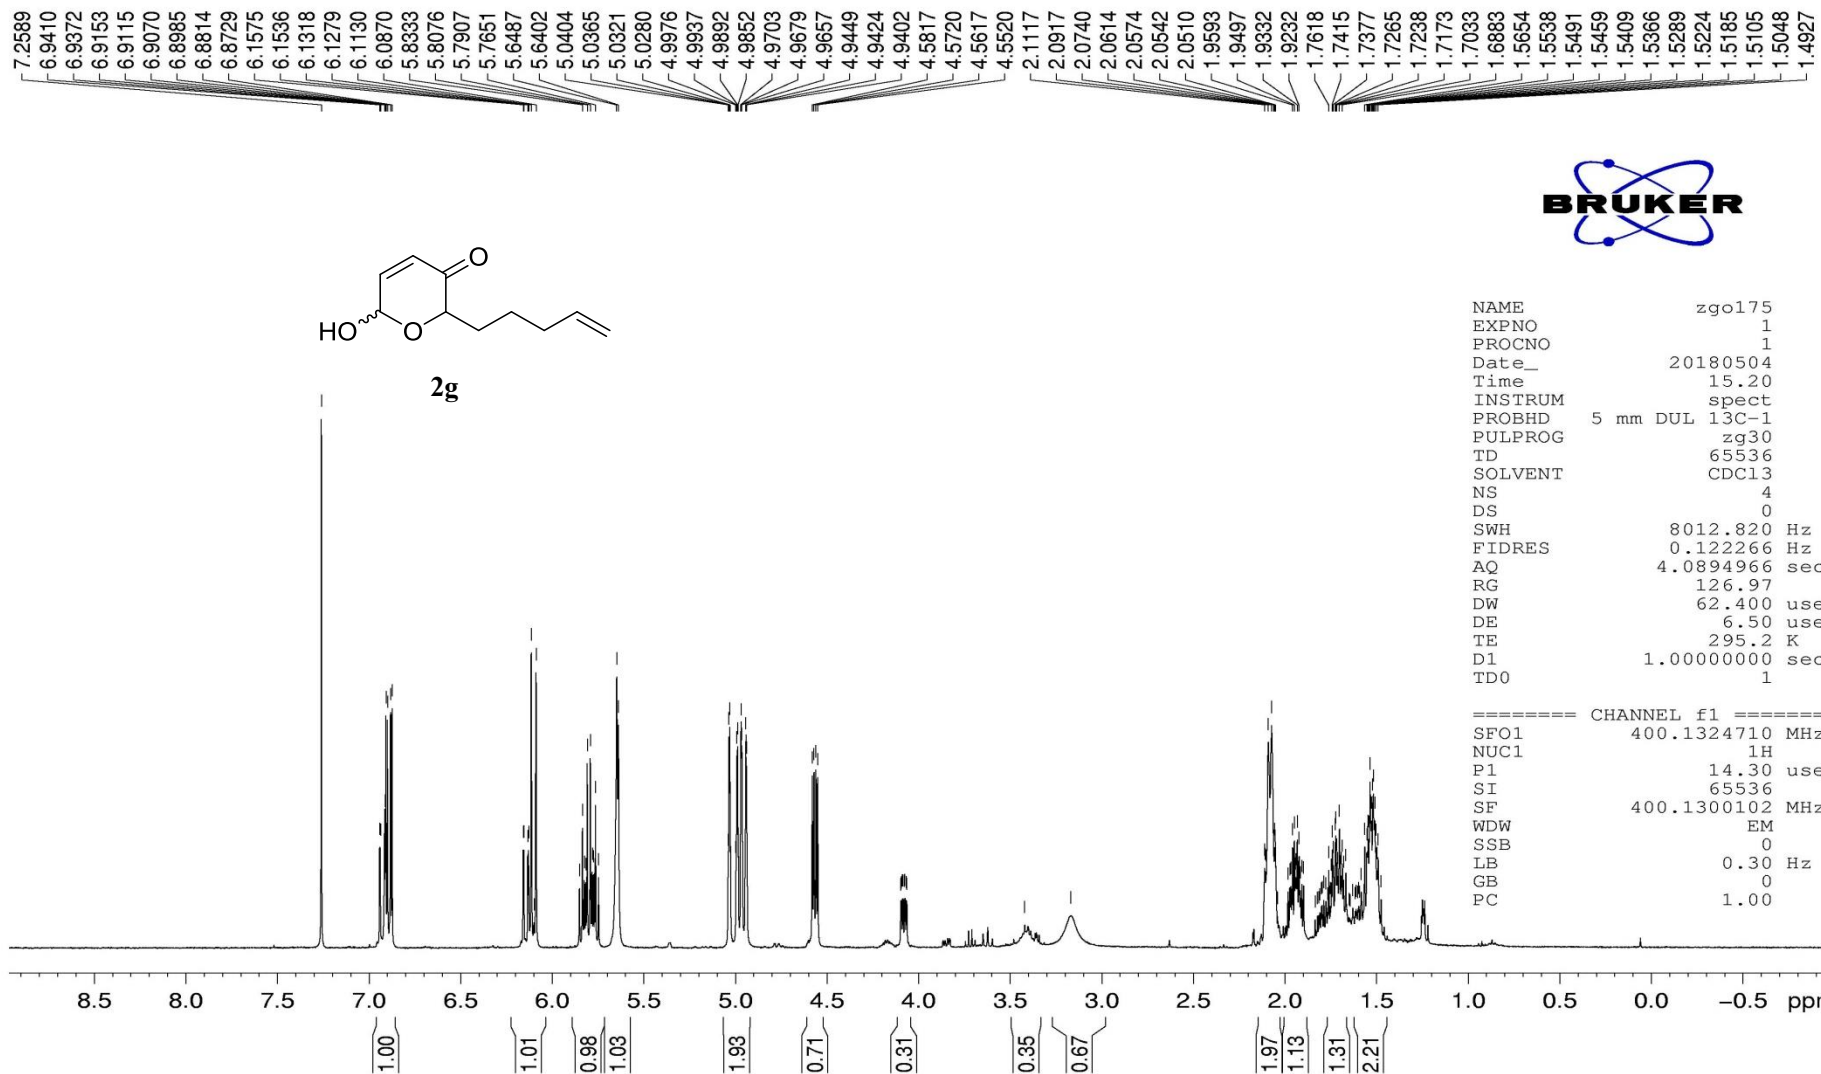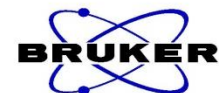



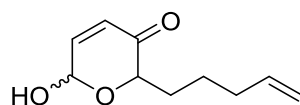

2g

196.66  
196.29

147.79

144.42

138.50

138.45

128.93

127.81

115.00

114.96

91.02

87.79

78.93

74.15

33.58

30.24

29.22

24.49

24.35

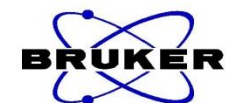

```

NAME                zgo175
EXPNO                2
PROCNO              1
Date_               20180504
Time                15.25
INSTRUM             spect
PROBHD              5 mm DUL 13C-1
PULPROG             zgpg30
TD                  65536
SOLVENT             CDCl3
NS                   173
DS                   0
SWH                 24038.461 Hz
FIDRES              0.366798 Hz
AQ                  1.3631988 sec
RG                  196.92
DW                  20.800 usec
DE                   6.50 usec
TE                   295.8 K
D1                   2.00000000 sec
D11                  0.03000000 sec
TD0                  1
  
```

```

===== CHANNEL f1 =====
SFO1                100.6228298 MHz
NUC1                 13C
P1                    9.60 usec
SI                   32768
SF                  100.6127560 MHz
WDW                   EM
SSB                    0
LB                    1.00 Hz
GB                    0
PC                    1.40
  
```

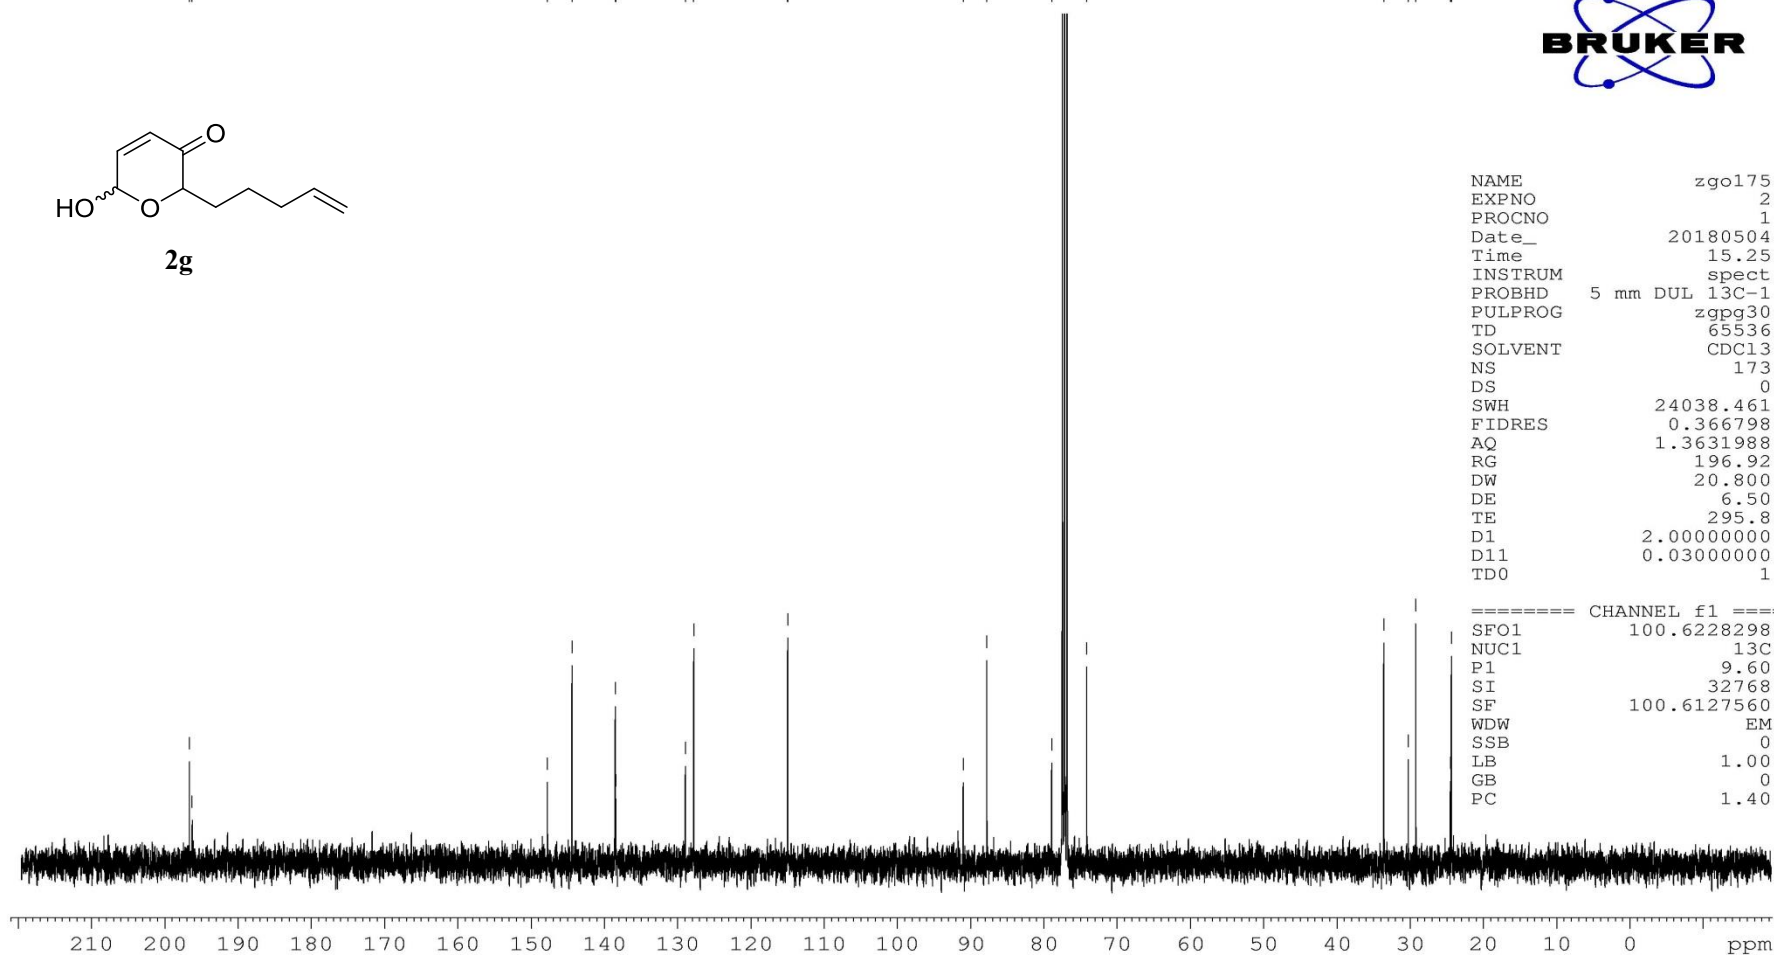



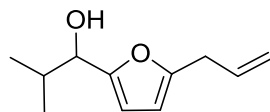

1h

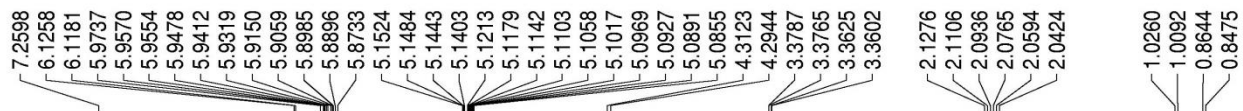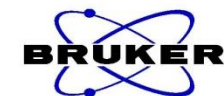

```

NAME                zgp89
EXPNO                1
PROCNO              1
Date_               20180626
Time                11.34
INSTRUM             spect
PROBHD              5 mm DUL 13C-1
PULPROG             zg30
TD                  65536
SOLVENT             CDCl3
NS                   3
DS                   0
SWH                 8012.820 Hz
FIDRES              0.122266 Hz
AQ                  4.0894966 sec
RG                   142.88
DW                  62.400 usec
DE                   6.50 usec
TE                  296.5 K
D1                  1.00000000 sec
TD0                 1
  
```

```

===== CHANNEL f1 =====
SFO1              400.1324710 MHz
NUC1               1H
P1                 14.30 usec
SI                 65536
SF                 400.1300098 MHz
WDW                EM
SSB                0
LB                 0.30 Hz
GB                 0
PC                 1.00
  
```

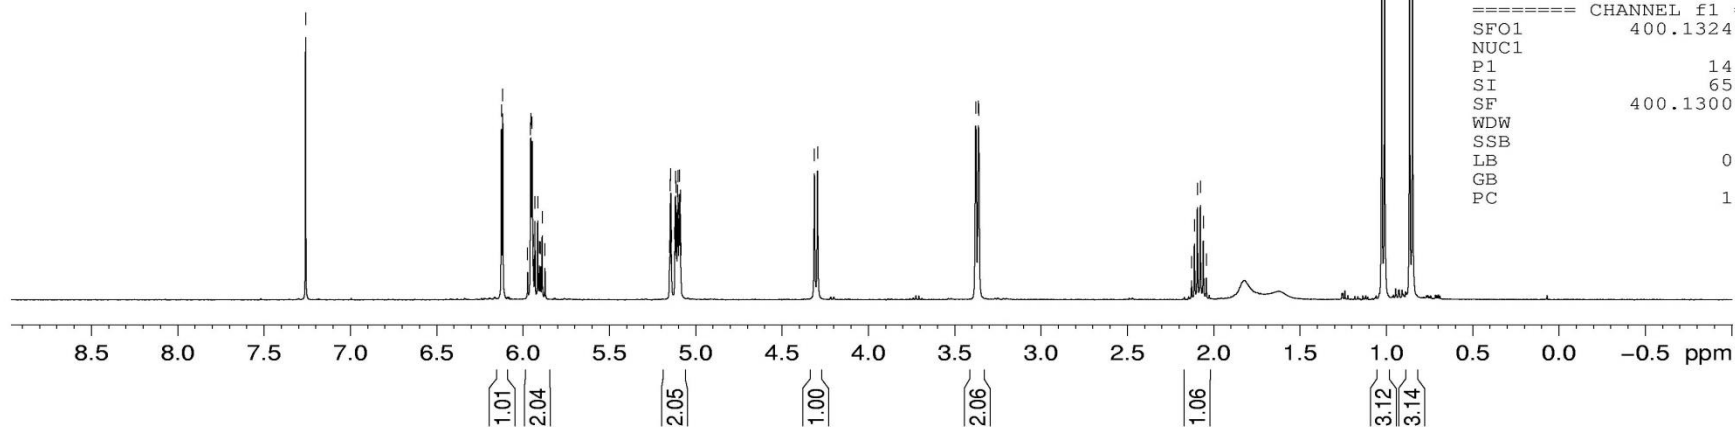

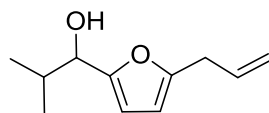

**1h**

154.91  
153.28

134.03

116.96

107.37  
106.10

73.74

33.35  
32.72

18.97  
18.44

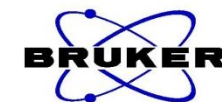

```

NAME                zgp89
EXPNO                2
PROCNO               1
Date_                20180626
Time                11.36
INSTRUM              spect
PROBHD               5 mm DUL 13C-1
PULPROG              zgpg30
TD                   65536
SOLVENT              CDC13
NS                    86
DS                     0
SWH                  24038.461 Hz
FIDRES               0.366798 Hz
AQ                   1.3631988 sec
RG                   196.92
DW                   20.800 usec
DE                    6.50 usec
TE                   297.0 K
D1                   2.00000000 sec
D11                  0.03000000 sec
TD0                  1
  
```

```

===== CHANNEL f1 =====
SFO1                100.6228298 MHz
NUC1                 13C
P1                   9.60 usec
SI                   32768
SF                   100.6127562 MHz
WDW                  EM
SSB                   0
LB                   1.00 Hz
GB                     0
PC                   1.40
  
```

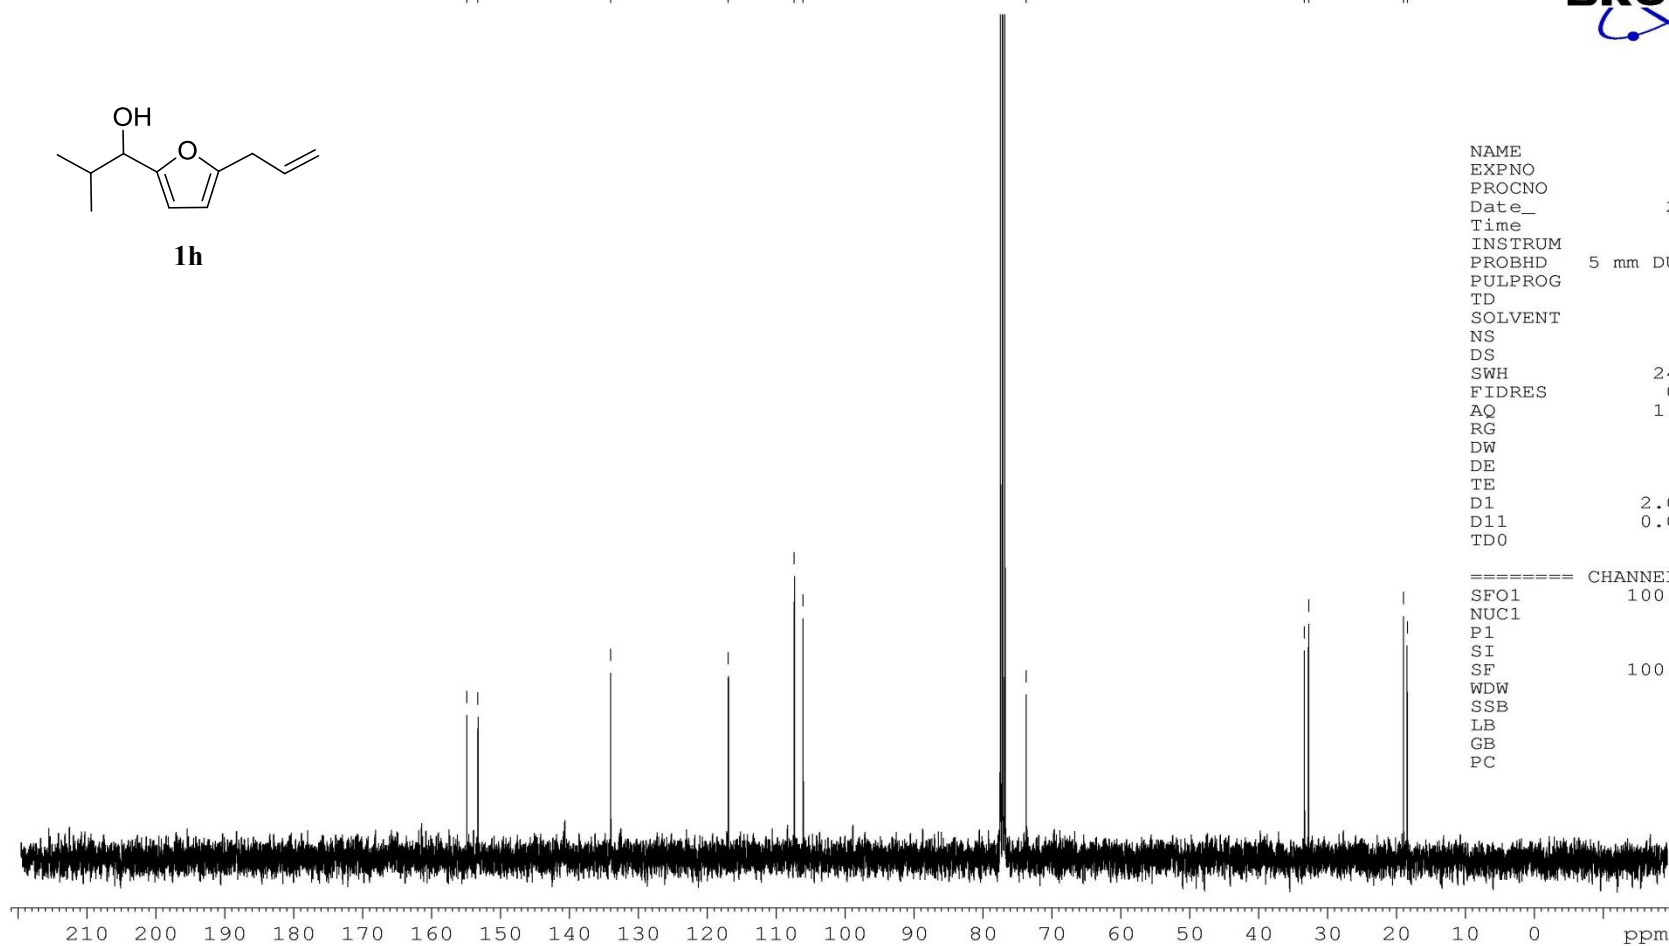

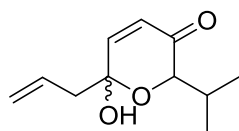

2h

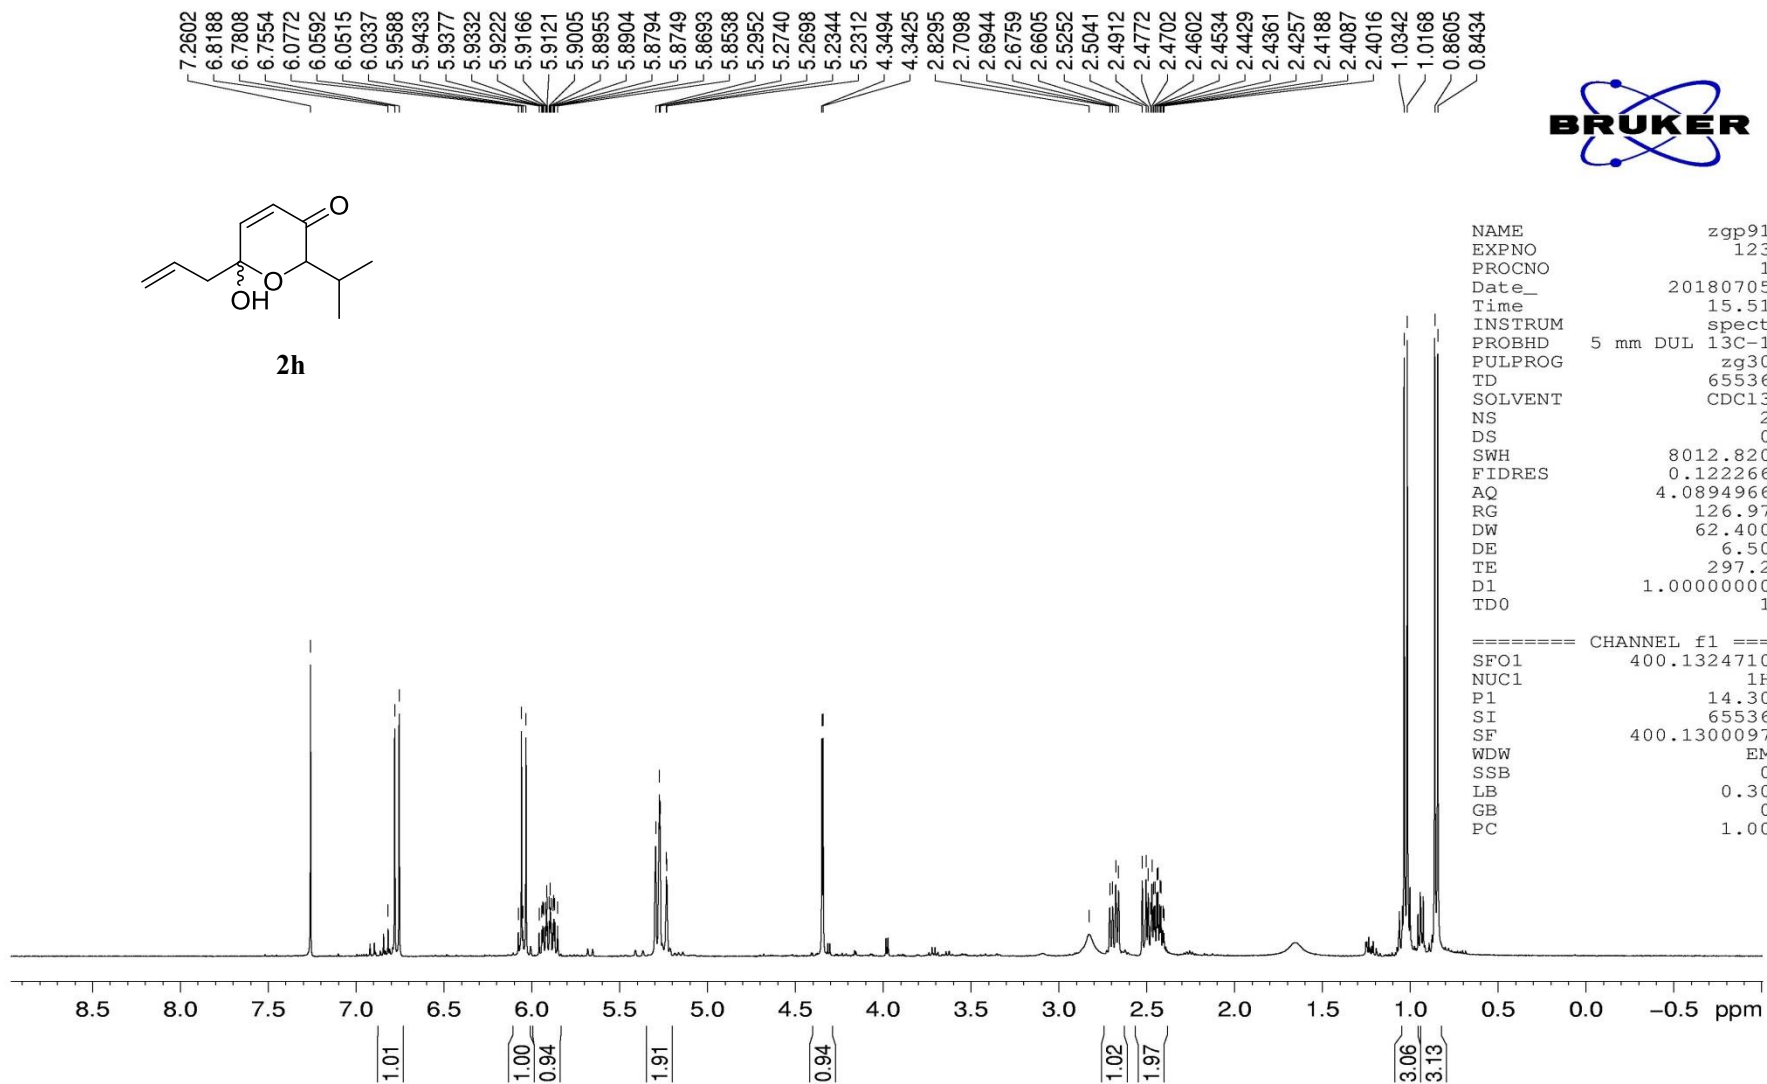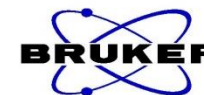

NAME zgp91  
 EXPNO 123  
 PROCNO 1  
 Date\_ 20180705  
 Time 15.51  
 INSTRUM spect  
 PROBHD 5 mm DUL 13C-1  
 PULPROG zg30  
 TD 65536  
 SOLVENT CDCl3  
 NS 2  
 DS 0  
 SWH 8012.820 Hz  
 FIDRES 0.122266 Hz  
 AQ 4.0894966 sec  
 RG 126.97  
 DW 62.400 usec  
 DE 6.50 usec  
 TE 297.2 K  
 D1 1.00000000 sec  
 TD0 1

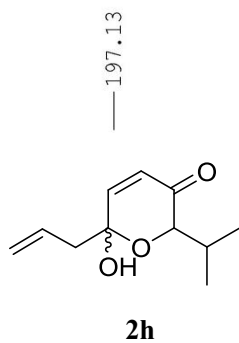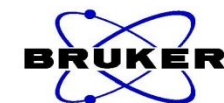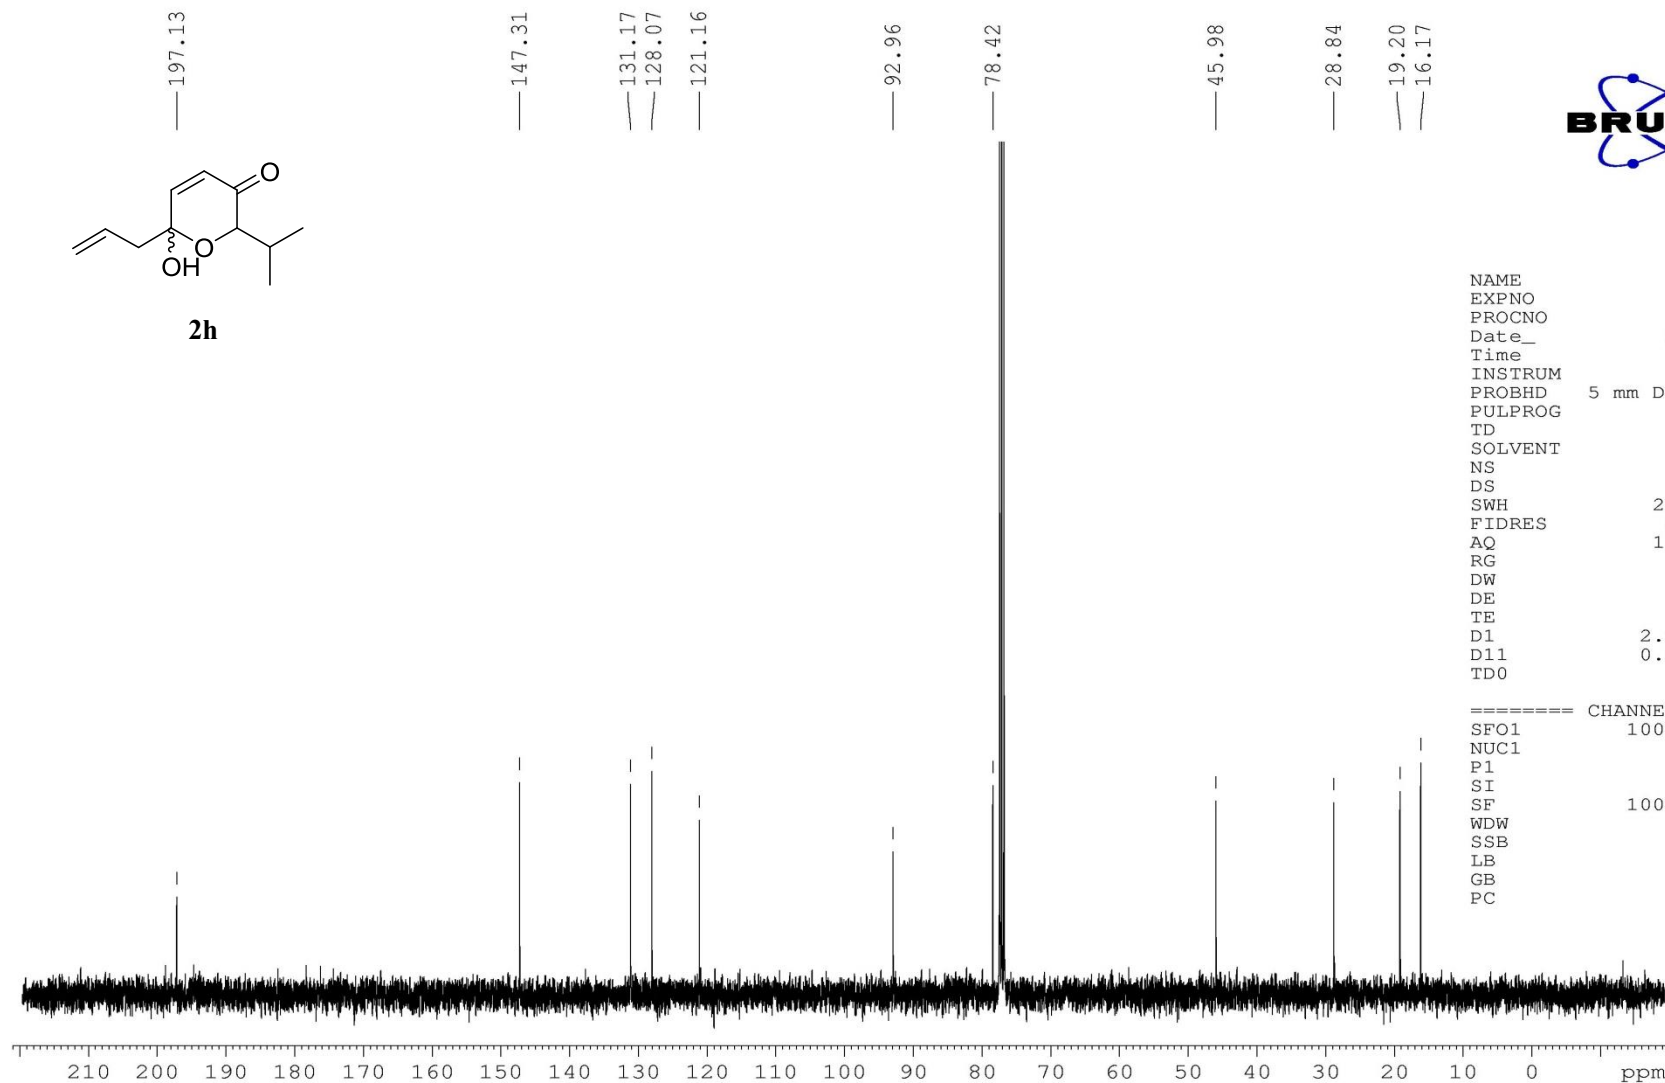

```

NAME                zgp91
EXPNO                124
PROCNO              1
Date_                20180705
Time                15.55
INSTRUM             spect
PROBHD             5 mm DUL 13C-1
PULPROG             zgpg30
TD                 65536
SOLVENT             CDC13
NS                  101
DS                   0
SWH                24038.461 Hz
FIDRES             0.366798 Hz
AQ                 1.3631988 sec
RG                 196.92
DW                 20.800 usec
DE                  6.50 usec
TE                  297.6 K
D1                 2.00000000 sec
D11                0.03000000 sec
TD0                 1
  
```

```

===== CHANNEL f1 =====
SFO1                100.6228298 MHz
NUC1                 13C
P1                   9.60 usec
SI                  32768
SF                 100.6127556 MHz
WDW                  EM
SSB                   0
LB                   1.00 Hz
GB                   0
PC                   1.40
  
```

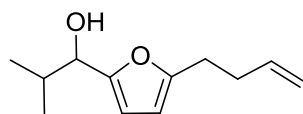

1i

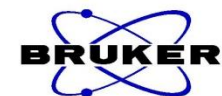

```

NAME                zgp92
EXPNO                1
PROCNO              1
Date_               20180626
Time                15.29
INSTRUM             spect
PROBHD              5 mm DUL 13C-1
PULPROG             zg30
TD                  65536
SOLVENT             CDC13
NS                   7
DS                   0
SWH                 8012.820 Hz
FIDRES              0.122266 Hz
AQ                  4.0894966 sec
RG                   126.97
DW                  62.400 usec
DE                   6.50 usec
TE                  296.2 K
D1                  1.00000000 sec
TD0                 1

===== CHANNEL f1 =====
SFO1                400.1324710 MHz
NUC1                 13C
P1                   14.30 usec
SI                   65536
SF                  400.1300098 MHz
WDW                  EM
SSB                  0
LB                   0.30 Hz
GB                   0
PC                   1.00
  
```

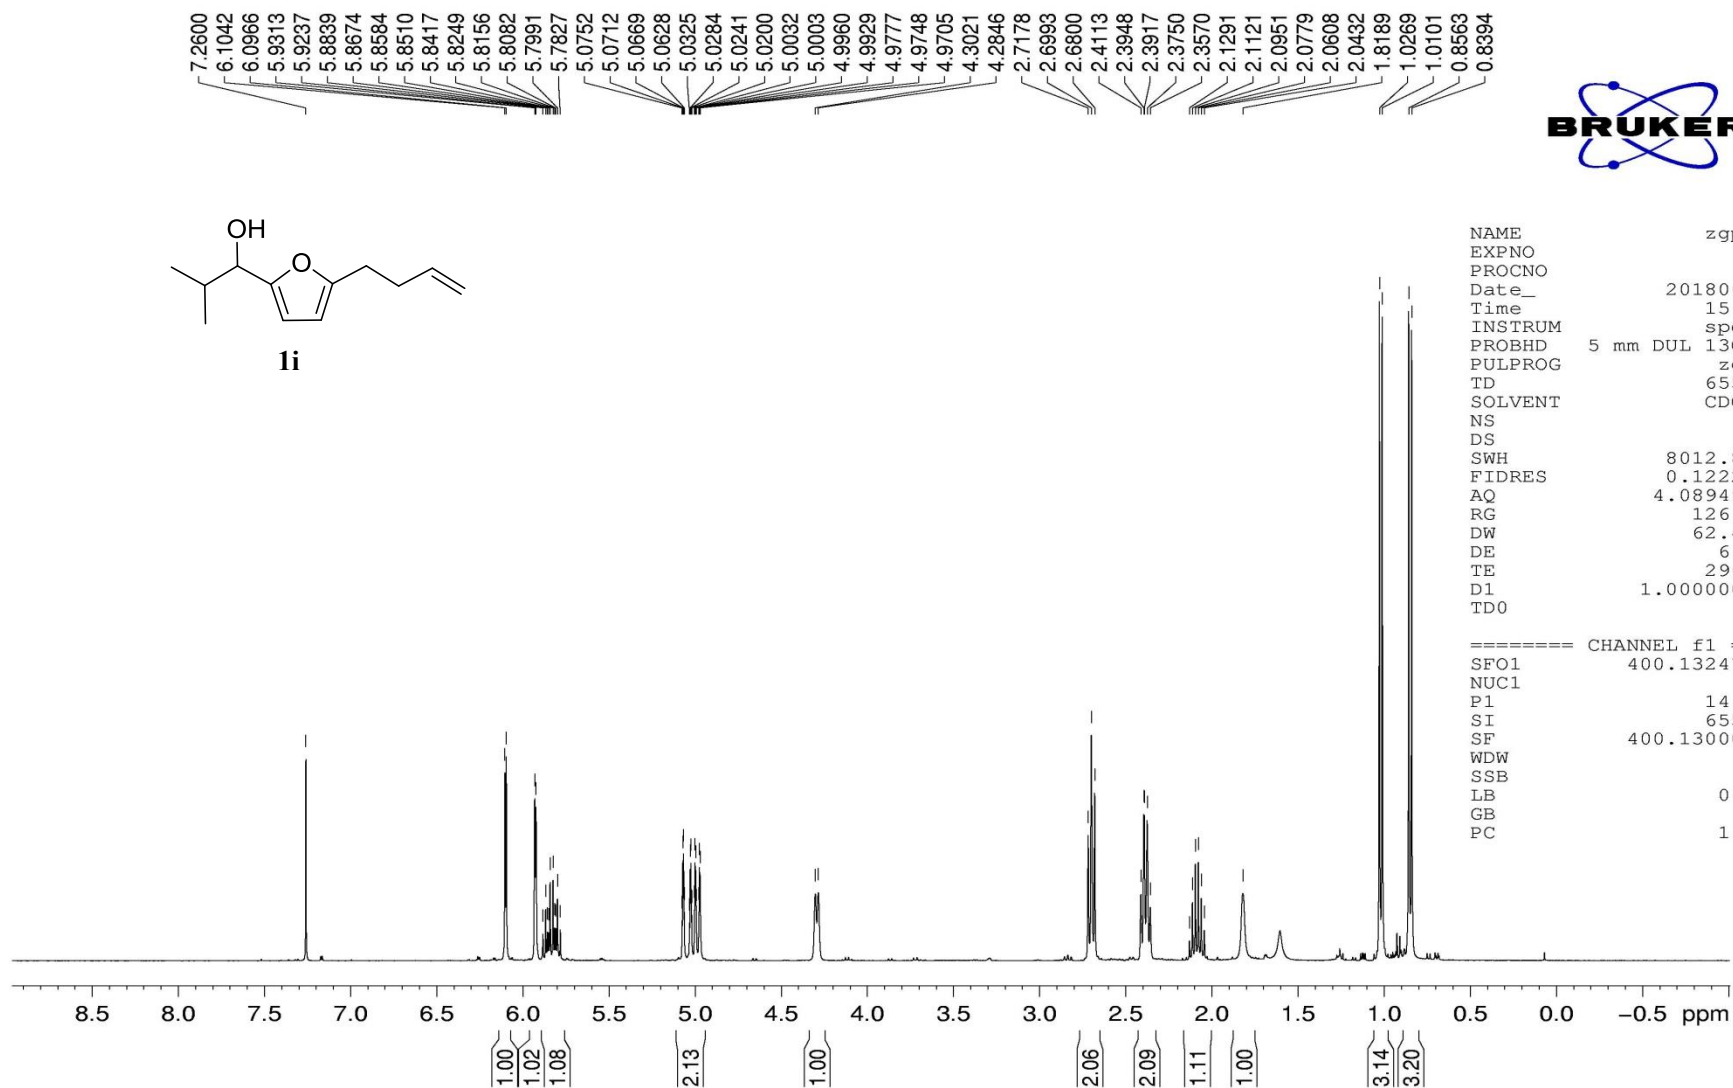

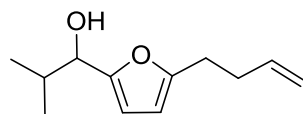

**1i**

154.99  
154.45

137.61

115.36

107.23  
105.53

73.75

33.38

32.23  
27.67

18.92  
18.48

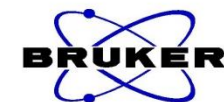

```

NAME                zgp92
EXPNO                2
PROCNO              1
Date_               20180626
Time                15.33
INSTRUM             spect
PROBHD              5 mm DUL 13C-1
PULPROG             zgpg30
TD                  65536
SOLVENT             CDC13
NS                   133
DS                   0
SWH                 24038.461 Hz
FIDRES              0.366798 Hz
AQ                  1.3631988 sec
RG                   196.92
DW                   20.800 usec
DE                    6.50 usec
TE                   296.7 K
D1                   2.00000000 sec
D11                  0.03000000 sec
TD0                  1
  
```

```

===== CHANNEL f1 =====
SFO1                100.6228298 MHz
NUC1                 13C
P1                    9.60 usec
SI                   32768
SF                   100.6127575 MHz
WDW                   EM
SSB                    0
LB                    1.00 Hz
GB                     0
PC                     1.40
  
```

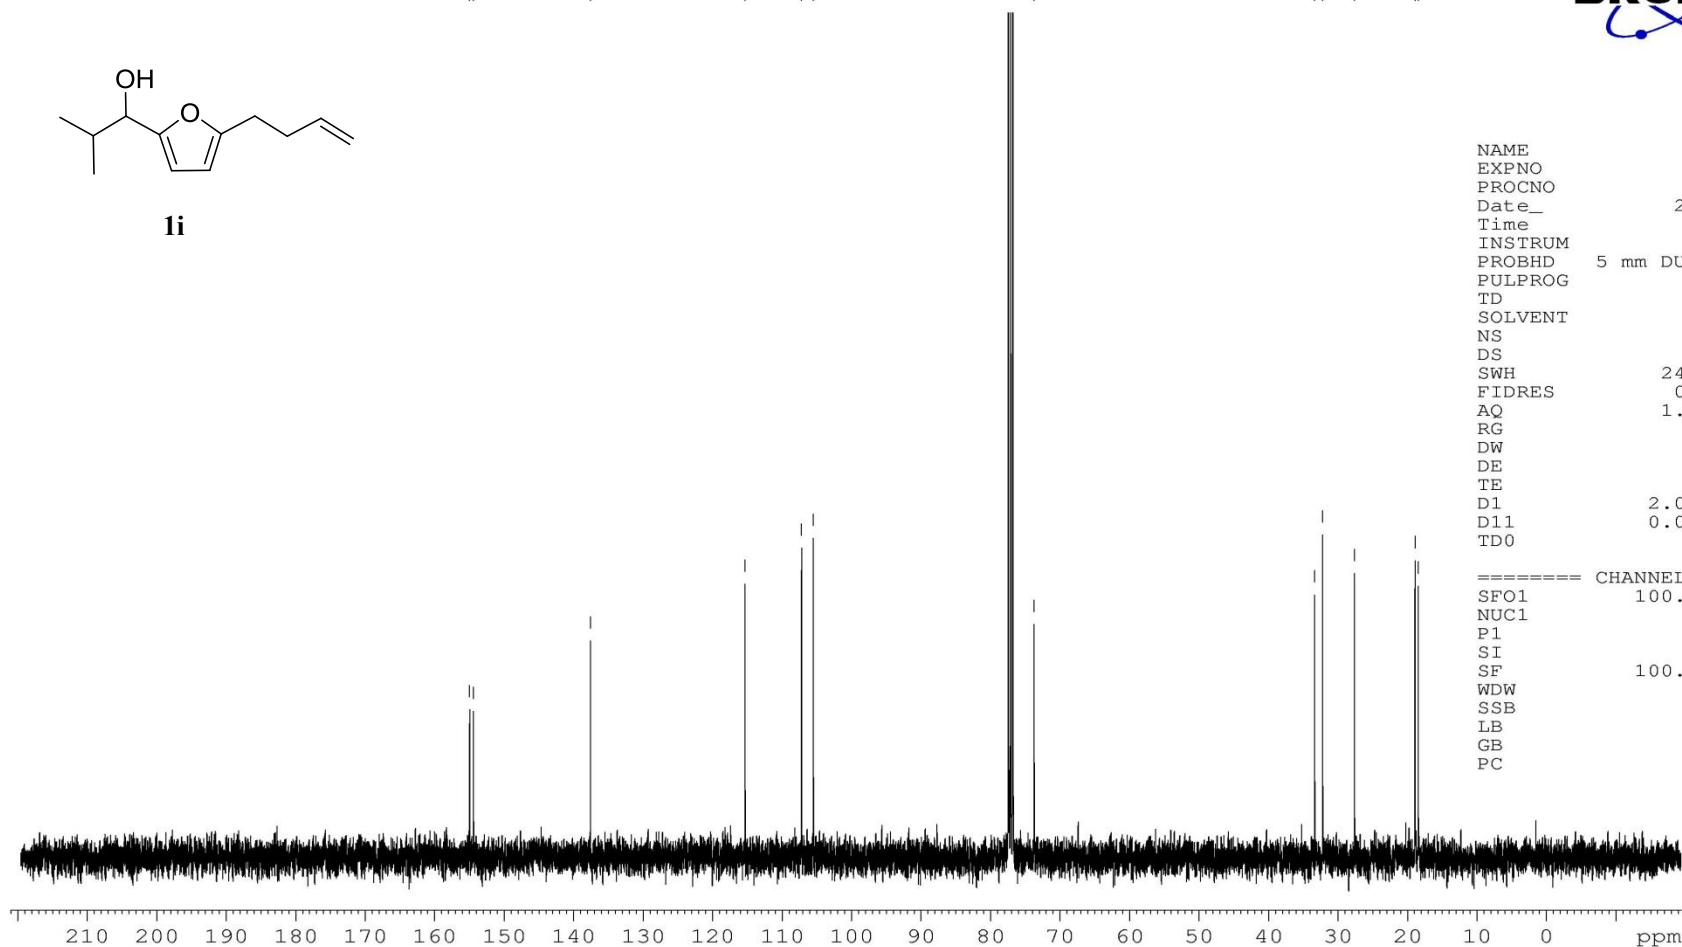

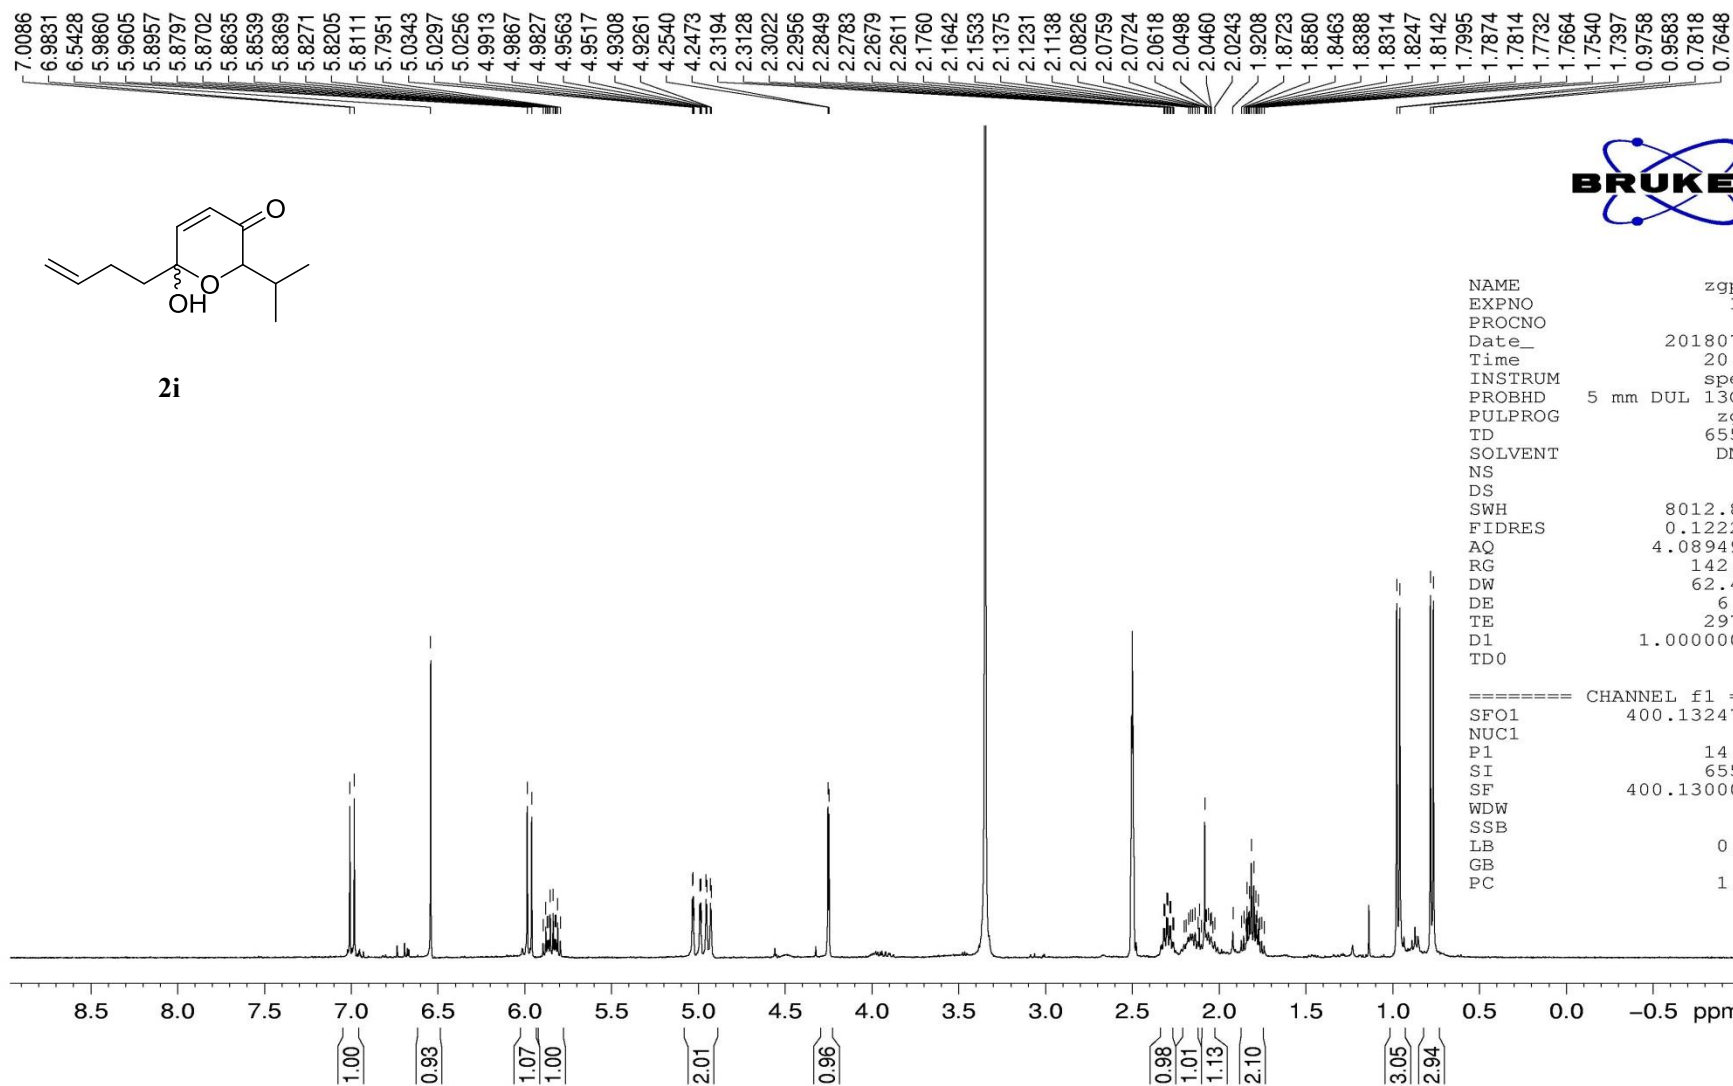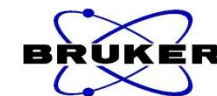

NAME zgp92  
 EXPNO 133  
 PROCNO 1  
 Date\_ 20180705  
 Time 20.34  
 INSTRUM spect  
 PROBHD 5 mm DUL 13C-1  
 PULPROG zg30  
 TD 65536  
 SOLVENT DMSO  
 NS 3  
 DS 0  
 SWH 8012.820 Hz  
 FIDRES 0.122266 Hz  
 AQ 4.0894966 sec  
 RG 142.88  
 DW 62.400 usec  
 DE 6.50 usec  
 TE 297.1 K  
 D1 1.00000000 sec  
 TD0 1

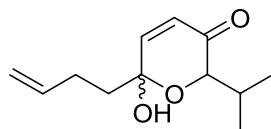

2i

—197.66

—150.66

—138.84

—126.67

—115.09

—93.37

—77.64

—28.87  
—28.17

—19.44  
—16.62

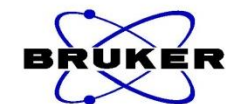

```

NAME                zgp92
EXPNO                134
PROCNO               1
Date_                20180705
Time                20.38
INSTRUM              spect
PROBHD               5 mm DUL 13C-1
PULPROG              zgpg30
TD                   65536
SOLVENT              DMSO
NS                   135
DS                   0
SWH                  24038.461 Hz
FIDRES               0.366798 Hz
AQ                   1.3631988 sec
RG                   196.92
DW                   20.800 usec
DE                   6.50 usec
TE                   297.6 K
D1                   2.00000000 sec
D11                  0.03000000 sec
TD0                  1
  
```

```

===== CHANNEL f1 =====
SFO1                100.6228298 MHz
NUC1                 13C
P1                   9.60 usec
SI                   32768
SF                  100.6127690 MHz
WDW                  EM
SSB                  0
LB                   1.00 Hz
GB                   0
PC                   1.40
  
```

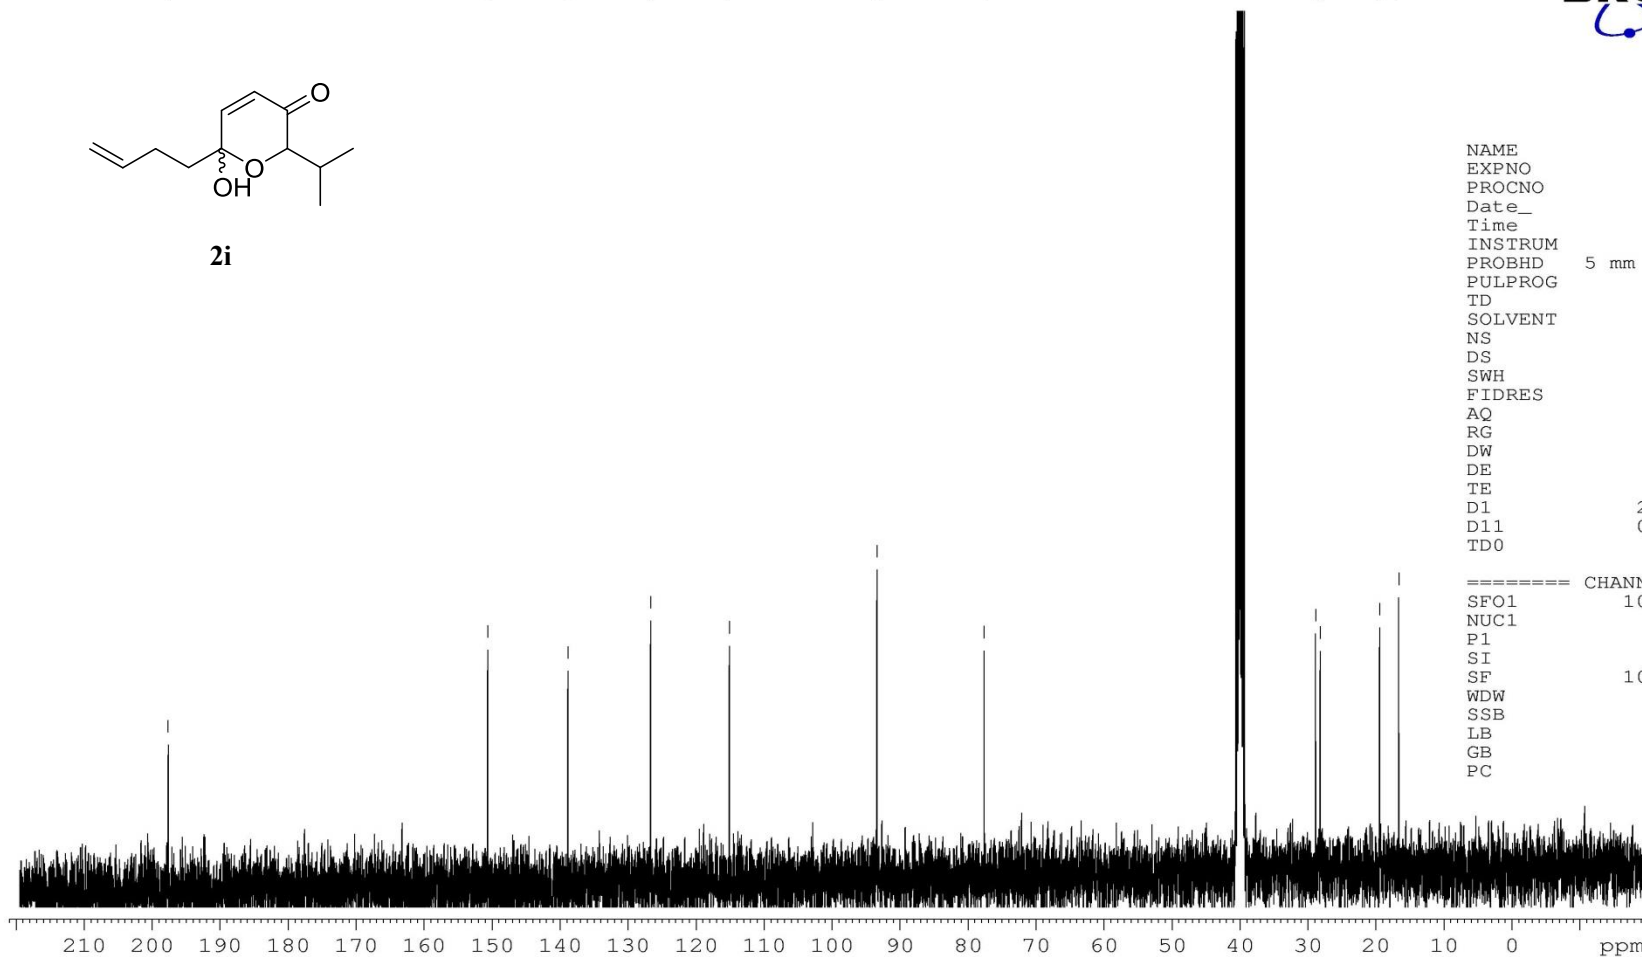



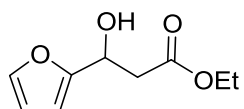

1j

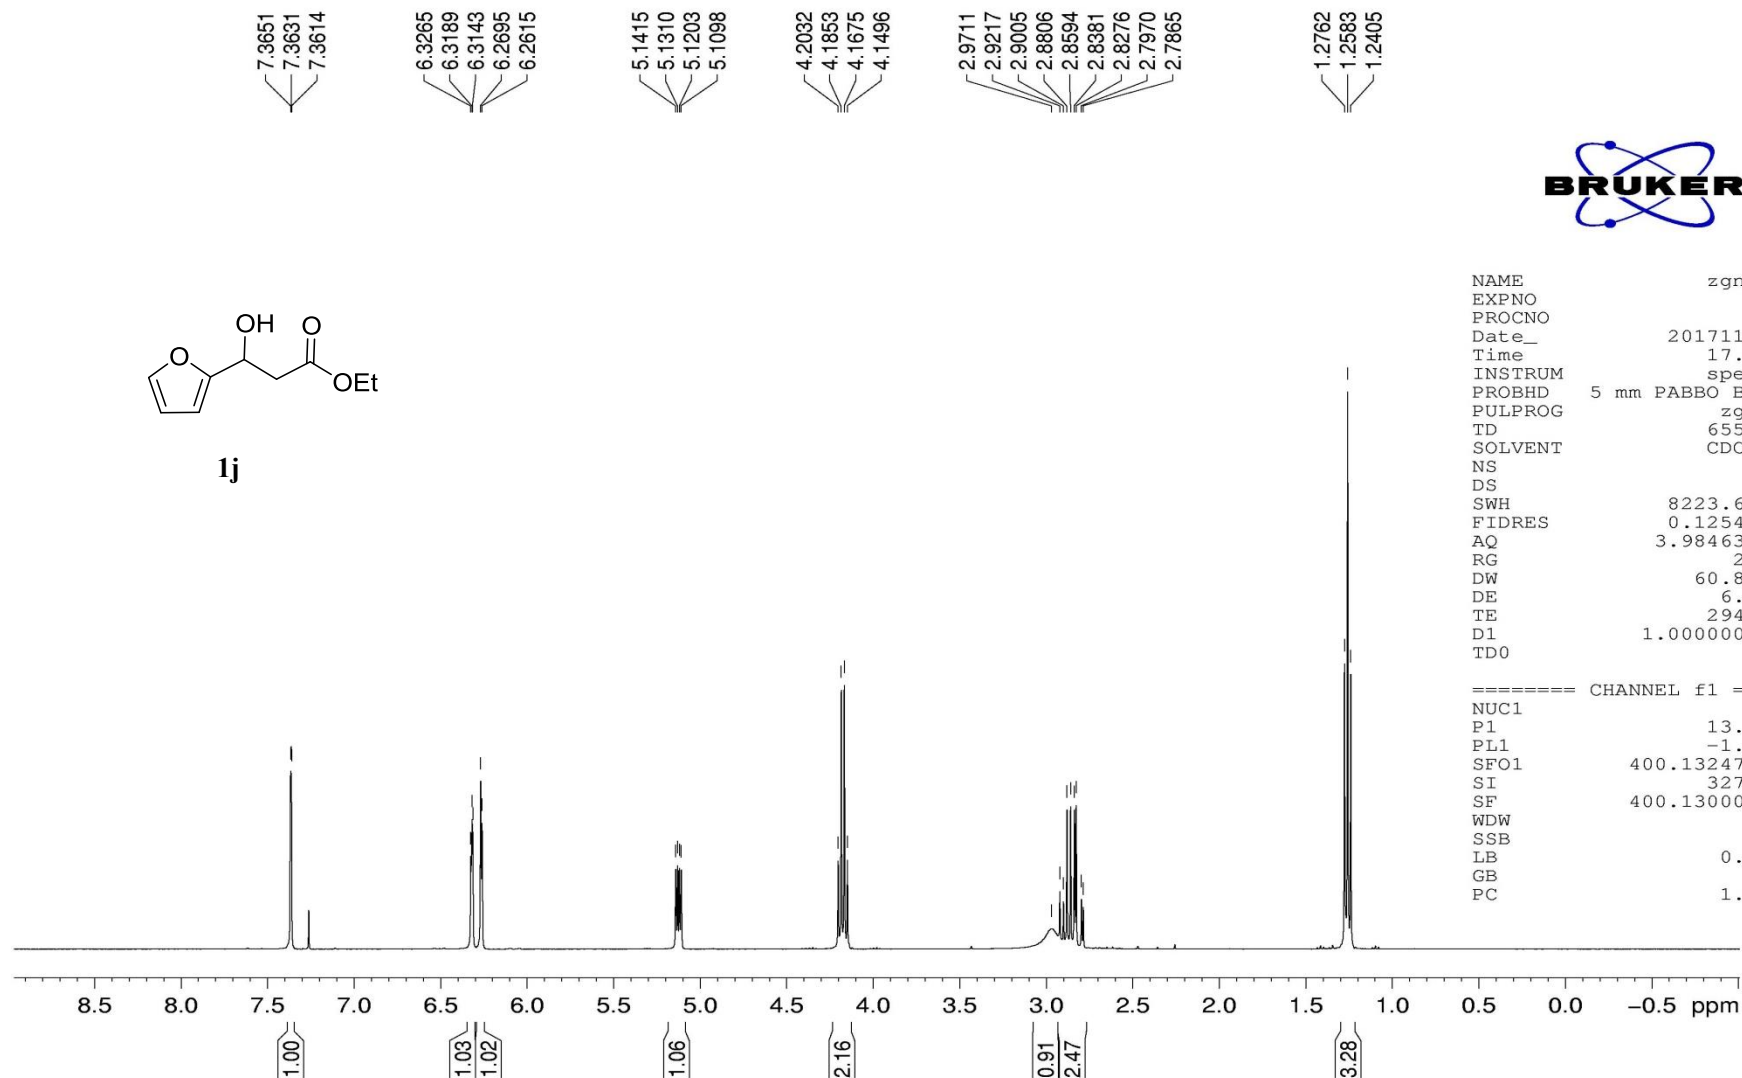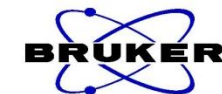

```

NAME                zgn18
EXPNO                1
PROCNO               1
Date_                20171113
Time                17.01
INSTRUM              spect
PROBHD               5 mm PABBO BB-
PULPROG              zg30
TD                   65536
SOLVENT              CDCl3
NS                    6
DS                     2
SWH                   8223.685 Hz
FIDRES               0.125483 Hz
AQ                   3.9846387 sec
RG                     203
DW                   60.800 usec
DE                     6.00 usec
TE                   294.1 K
D1                   1.00000000 sec
TD0                   1

===== CHANNEL f1 =====
NUC1                  1H
P1                   13.60 usec
PL1                  -1.00 dB
SFO1                 400.1324710 MHz
SI                   32768
SF                   400.1300098 MHz
WDW                   EM
SSB                    0
LB                    0.30 Hz
GB                     0
PC                     1.00
  
```

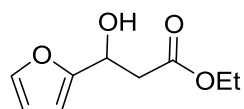

1j

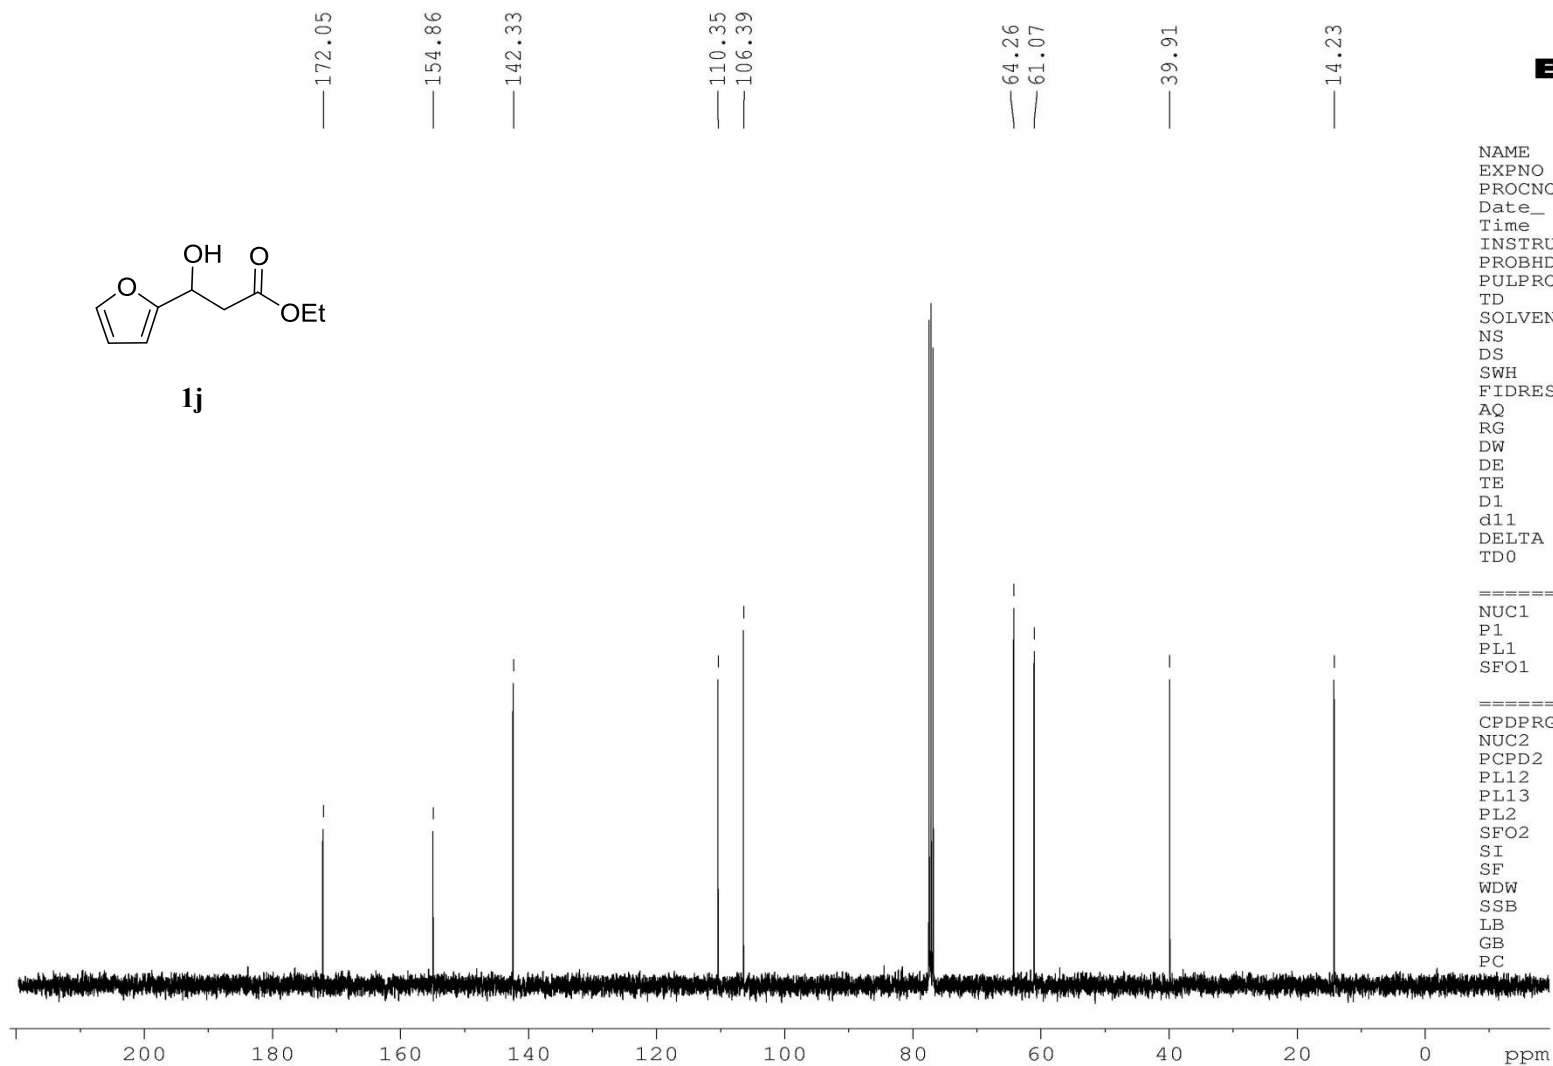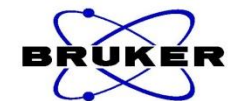

```

NAME                zgn18
EXPNO                2
PROCNO              1
Date_               20171113
Time                17.06
INSTRUM             spect
PROBHD              5 mm PABBO BB-
PULPROG             zgpg30
TD                 65536
SOLVENT             CDCl3
NS                  65
DS                  2
SWH                 24038.461 Hz
FIDRES              0.366798 Hz
AQ                 1.3631988 sec
RG                  2050
DW                 20.800 usec
DE                  6.00 usec
TE                 294.8 K
D1                 2.00000000 sec
d11                 0.03000000 sec
DELTA               1.89999998 sec
TD0                 1
  
```

```

===== CHANNEL f1 =====
NUC1                 13C
P1                   9.25 usec
PL1                  -3.00 dB
SFO1                100.6228298 MHz
  
```

```

===== CHANNEL f2 =====
CPDPRG2             waltz16
NUC2                 1H
PCPD2               80.00 usec
PL12                12.45 dB
PL13                18.00 dB
PL2                 -1.00 dB
SFO2               400.1316005 MHz
SI                  32768
SF                 100.6127589 MHz
WDW                  EM
SSB                  0
LB                   1.00 Hz
GB                   0
PC                   1.40
  
```

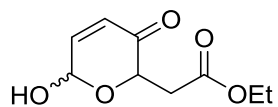

2j

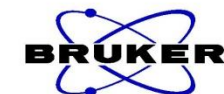

NAME zgp49-3  
 EXPNO 5  
 PROCNO 1  
 Date\_ 20180613  
 Time 15.43  
 INSTRUM spect  
 PROBHD 5 mm DUL 13C-1  
 PULPROG zg30  
 TD 65536  
 SOLVENT CDCl3  
 NS 5  
 DS 0  
 SWH 8012.820 Hz  
 FIDRES 0.122266 Hz  
 AQ 4.0894966 sec  
 RG 126.97  
 DW 62.400 usec  
 DE 6.50 usec  
 TE 294.5 K  
 D1 1.00000000 sec  
 TD0 1

===== CHANNEL f1 =====  
 SFO1 400.1324710 MHz  
 NUC1 1H  
 P1 14.30 usec  
 SI 65536  
 SF 400.1300101 MHz  
 WDW EM  
 SSB 0  
 LB 0.30 Hz  
 GB 0  
 PC 1.00

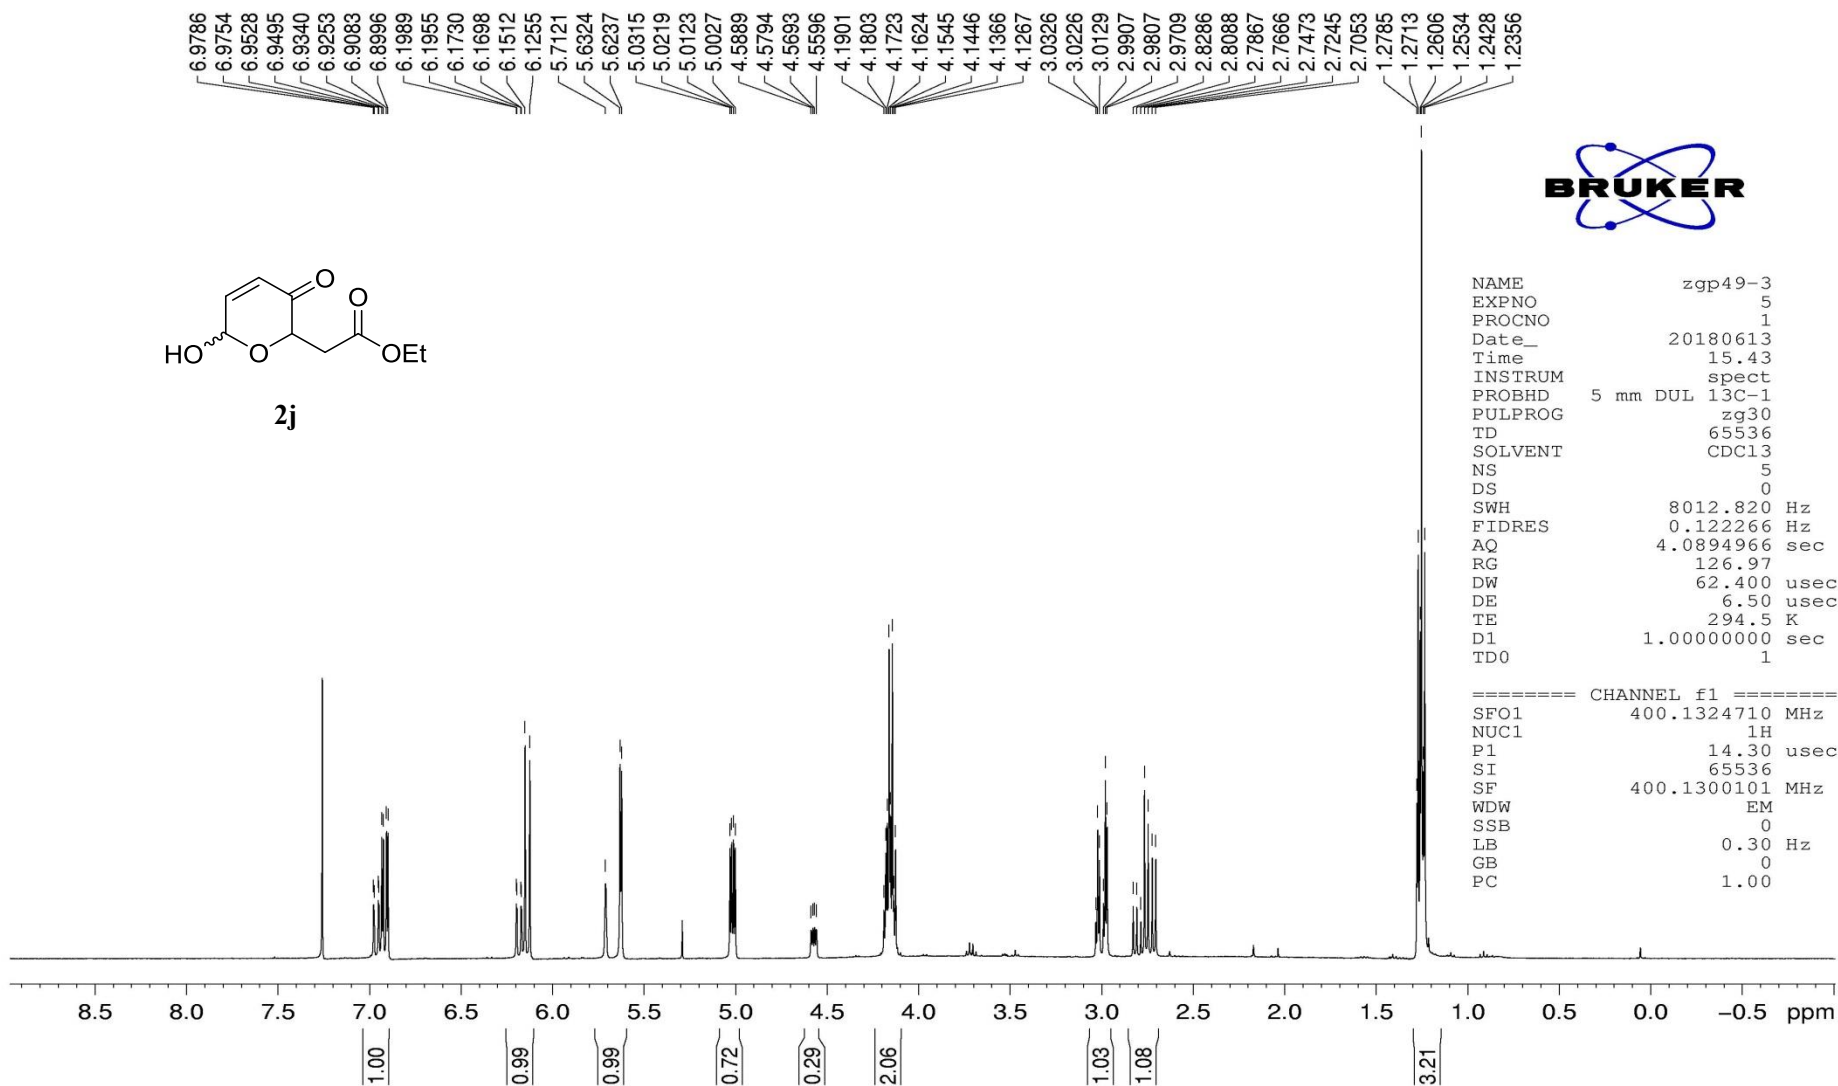

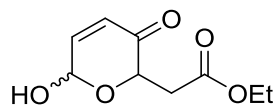

2j

195.06  
194.57

171.14

148.42  
144.69

128.46  
127.24

90.99  
87.84

75.43  
70.86

61.30  
61.19

36.18  
35.38

14.23

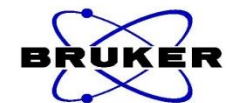

```

NAME          zgp49-3
EXPNO          6
PROCNO         1
Date_          20180613
Time           15.48
INSTRUM        spect
PROBHD         5 mm DUL 13C-1
PULPROG        zgpg30
TD             65536
SOLVENT        CDC13
NS             305
DS             0
SWH            24038.461 Hz
FIDRES         0.366798 Hz
AQ            1.3631988 sec
RG            196.92
DW            20.800 usec
DE            6.50 usec
TE            295.1 K
D1            2.00000000 sec
D11           0.03000000 sec
TD0           1
  
```

```

===== CHANNEL f1 =====
SF01          100.6228298 MHz
NUC1           13C
P1            9.60 usec
SI            32768
SF            100.6127575 MHz
WDW            EM
SSB            0
LB            1.00 Hz
GB            0
PC            1.40
  
```

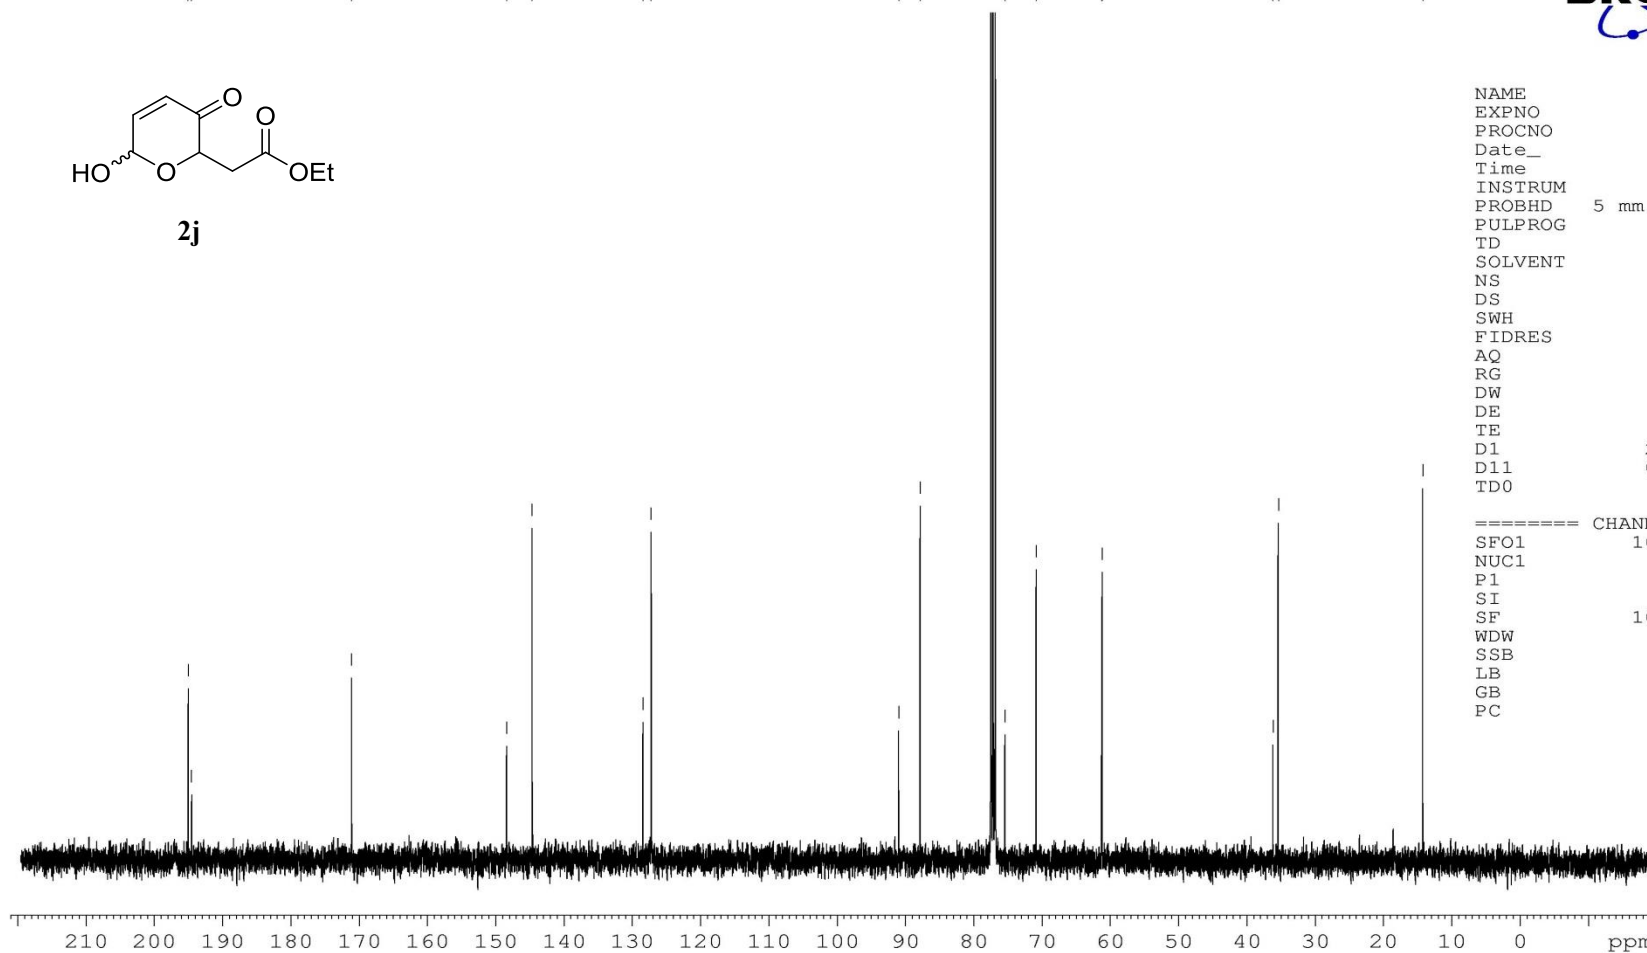

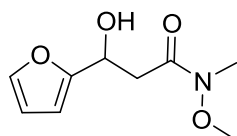

**1k**

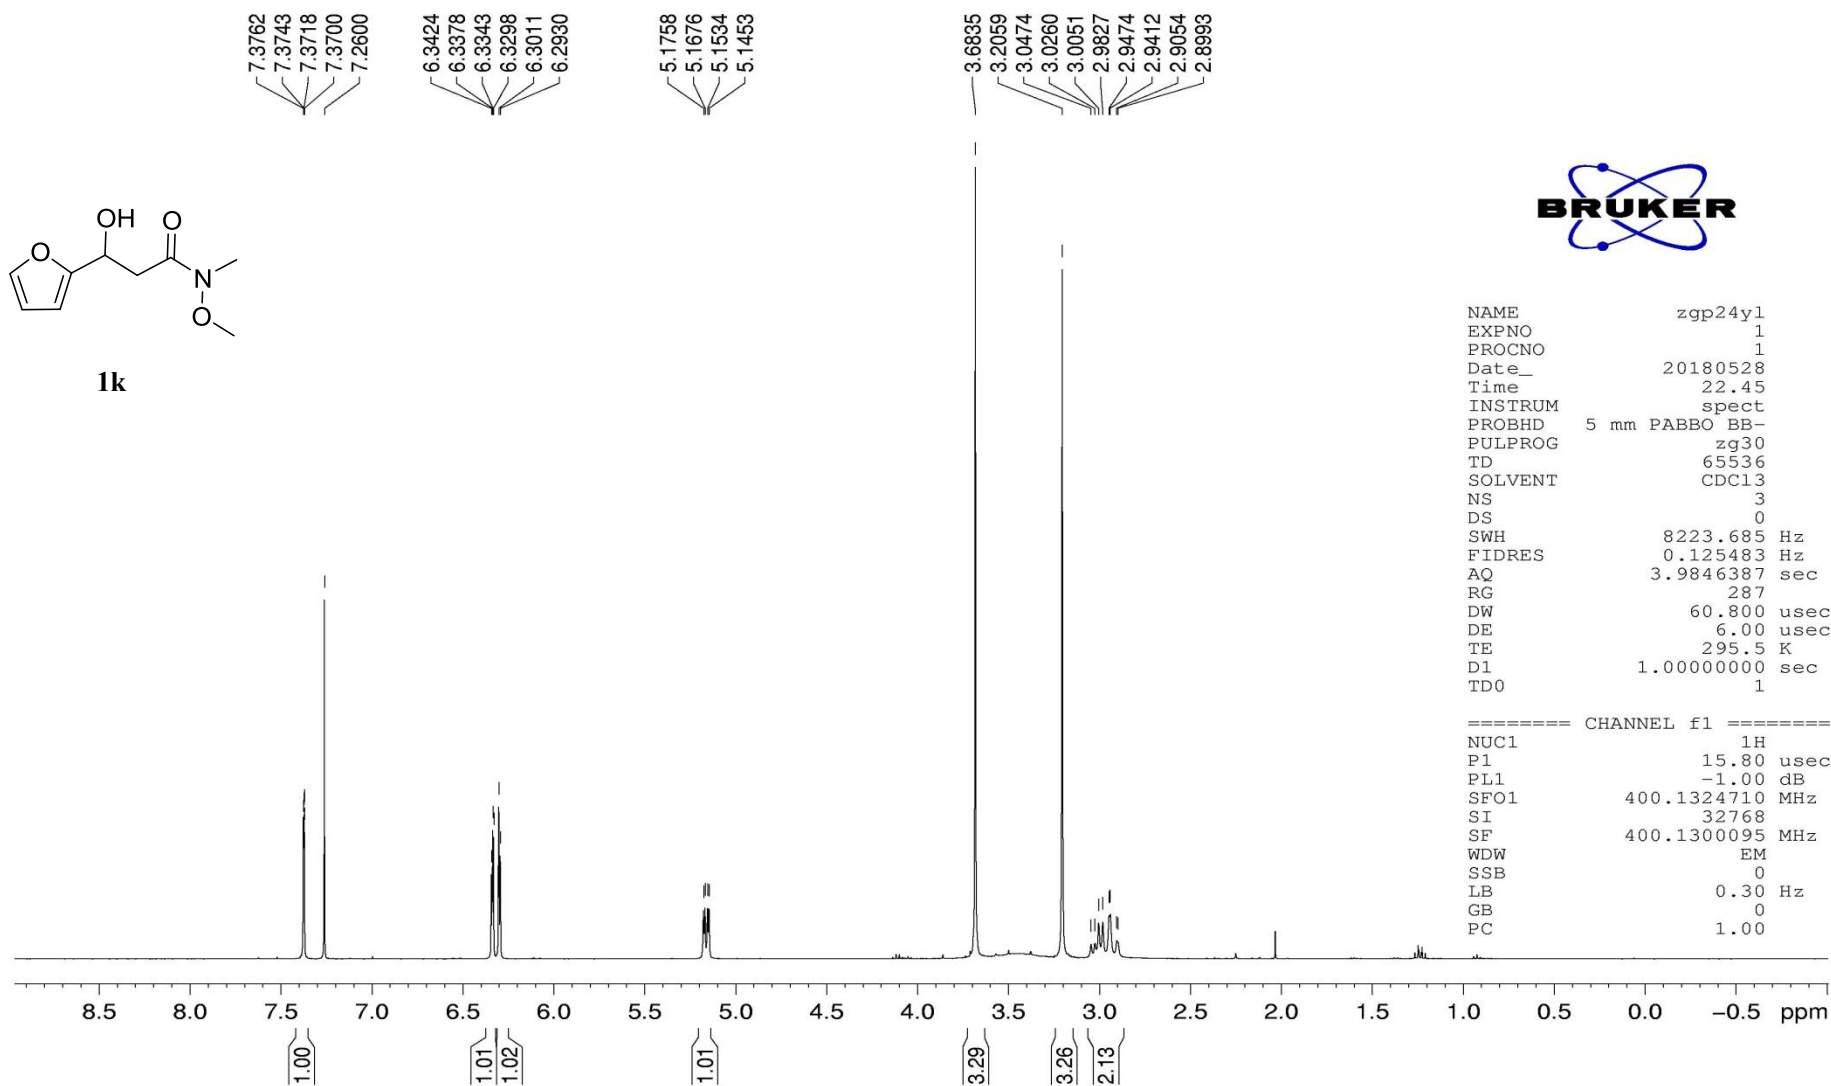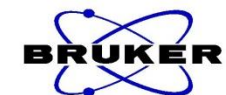

```

NAME          zgp24y1
EXPNO          1
PROCNO         1
Date_          20180528
Time           22.45
INSTRUM        spect
PROBHD         5 mm PABBO BB-
PULPROG        zg30
TD             65536
SOLVENT        CDCl3
NS              3
DS              0
SWH            8223.685 Hz
FIDRES         0.125483 Hz
AQ             3.9846387 sec
RG              287
DW             60.800 usec
DE              6.00 usec
TE             295.5 K
D1             1.00000000 sec
TD0            1

===== CHANNEL f1 =====
NUC1            1H
P1             15.80 usec
PL1            -1.00 dB
SFO1           400.1324710 MHz
SI             32768
SF             400.1300095 MHz
WDW            EM
SSB            0
LB             0.30 Hz
GB             0
PC             1.00
  
```

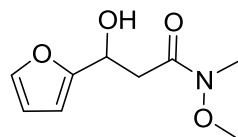

**1k**

— 172.94

— 155.33

— 142.11

— 110.36

— 106.29

— 64.41

— 61.44

— 36.87

— 32.00

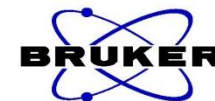

```

NAME                zgp24y1
EXPNO                2
PROCNO              1
Date_               20180528
Time                22.49
INSTRUM             spect
PROBHD              5 mm PABBO BB-
PULPROG             zgpg30
TD                 65536
SOLVENT             CDCl3
NS                  139
DS                   0
SWH                 24038.461 Hz
FIDRES              0.366798 Hz
AQ                 1.3631988 sec
RG                   90.5
DW                 20.800 usec
DE                   6.00 usec
TE                  296.0 K
D1                 2.00000000 sec
d11                 0.03000000 sec
DELTA               1.89999998 sec
TD0                 1
  
```

```

===== CHANNEL f1 =====
NUC1                 13C
P1                   8.60 usec
PL1                  -3.00 dB
SFO1                100.6228298 MHz
  
```

```

===== CHANNEL f2 =====
CPDPRG2             waltz16
NUC2                 1H
PCPD2               80.00 usec
PL12                14.39 dB
PL13                18.00 dB
PL2                 -1.00 dB
SFO2                400.1316005 MHz
SI                  32768
SF                  100.6127585 MHz
WDW                  EM
SSB                   0
LB                   1.00 Hz
GB                   0
PC                   1.40
  
```

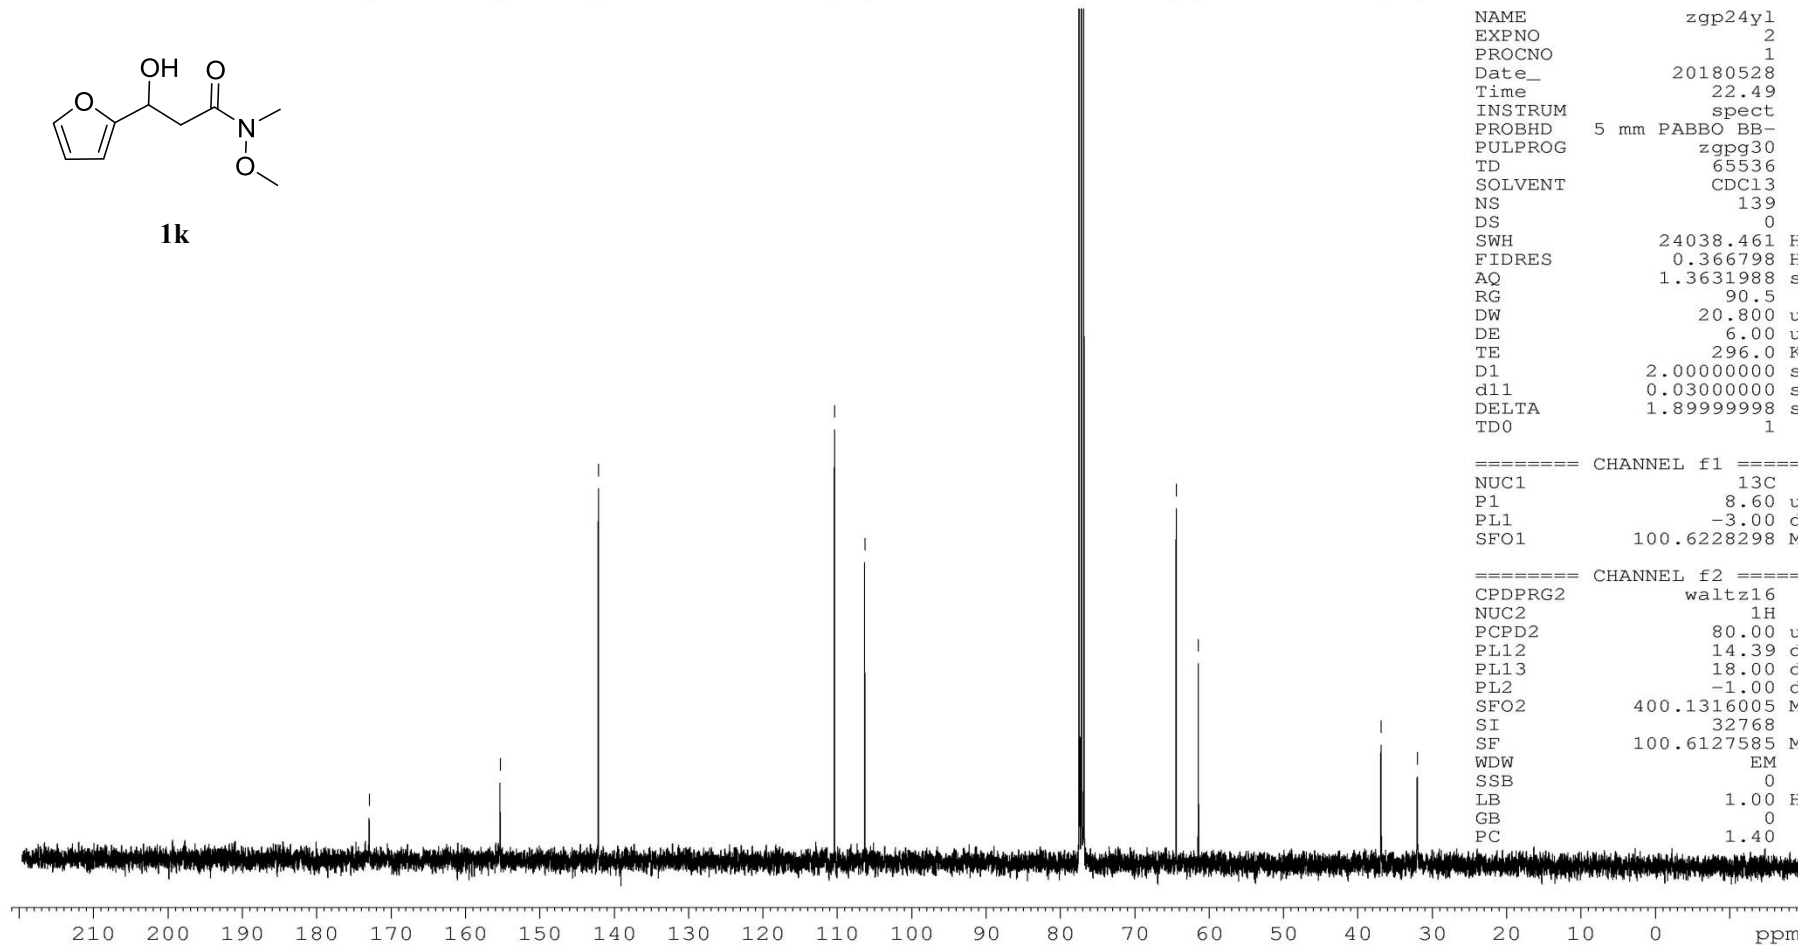

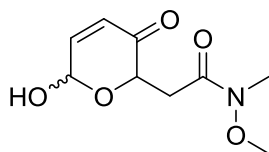

2k

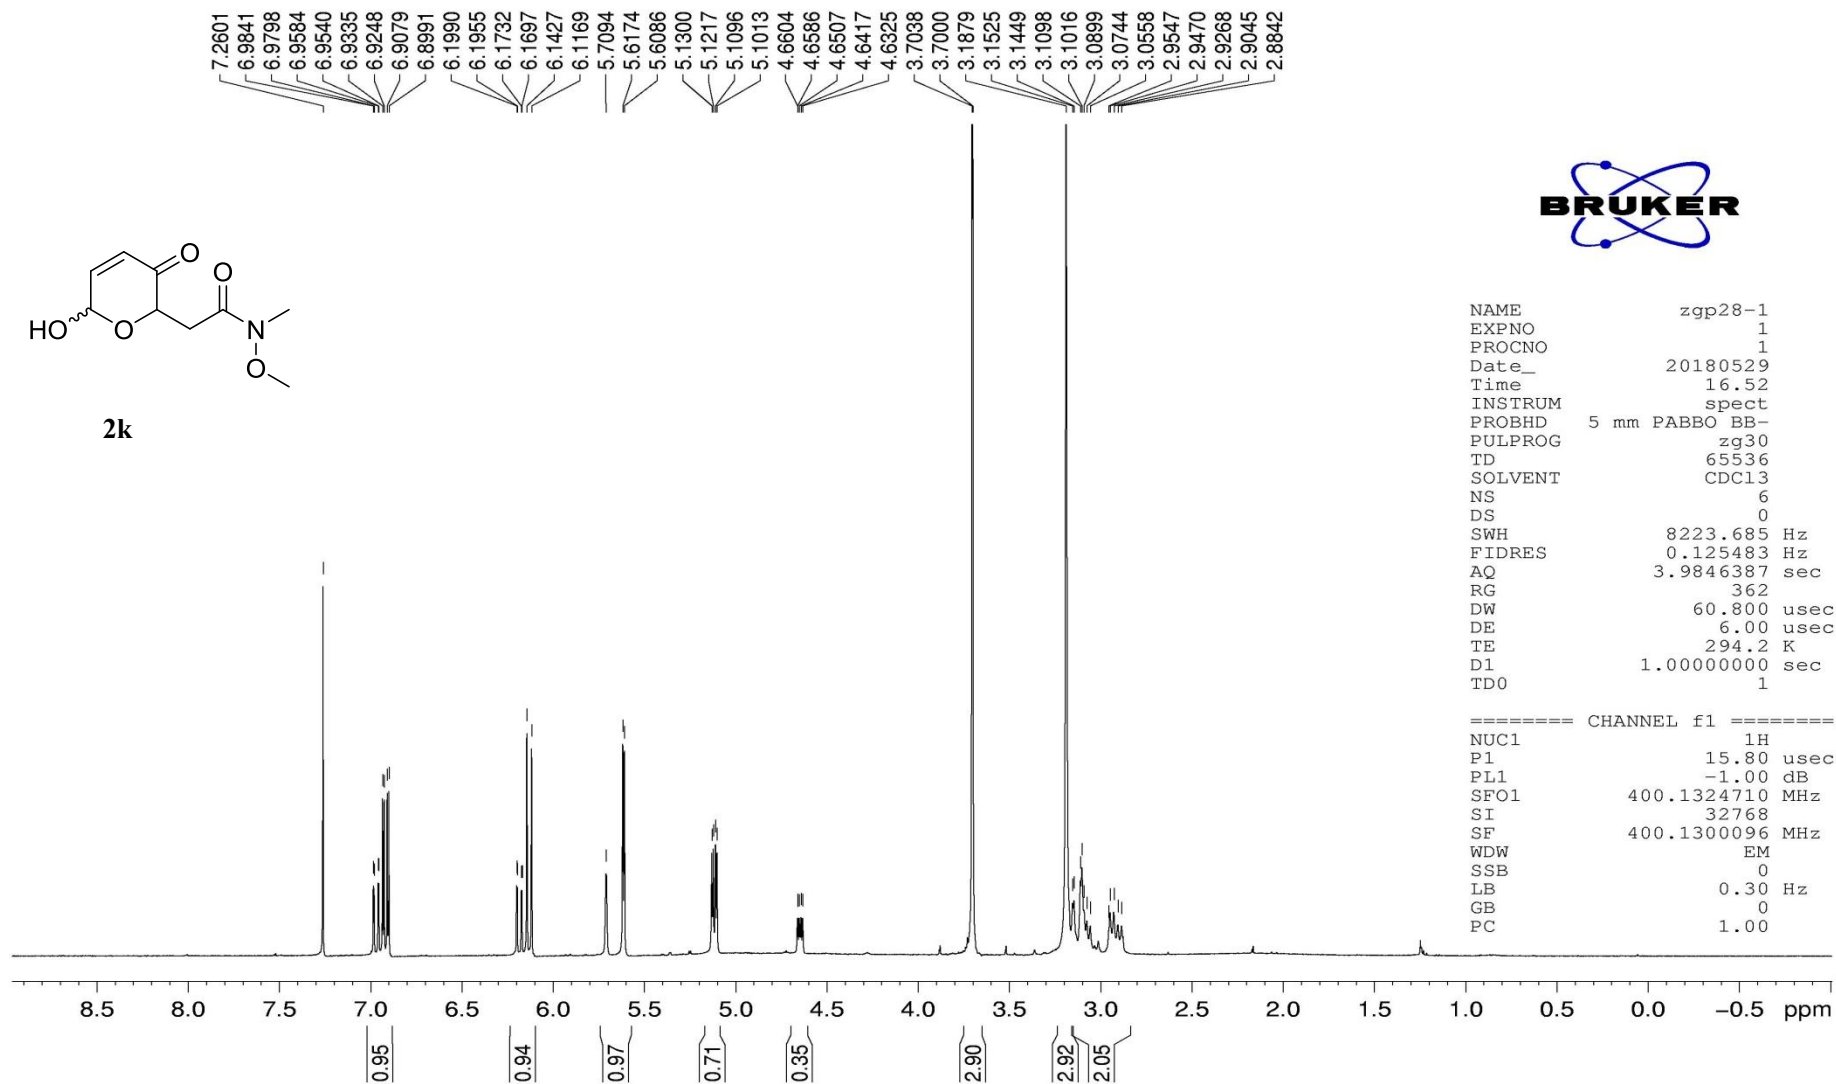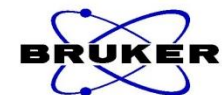

```

NAME                zgp28-1
EXPNO                1
PROCNO               1
Date_                20180529
Time                16.52
INSTRUM              spect
PROBHD               5 mm PABBO BB-
PULPROG              zg30
TD                   65536
SOLVENT              CDCl3
NS                    6
DS                    0
SWH                  8223.685 Hz
FIDRES               0.125483 Hz
AQ                   3.9846387 sec
RG                    362
DW                   60.800 usec
DE                    6.00 usec
TE                   294.2 K
D1                   1.00000000 sec
TD0                  1

===== CHANNEL f1 =====
NUC1                  1H
P1                    15.80 usec
PL1                   -1.00 dB
SFO1                 400.1324710 MHz
SI                    32768
SF                   400.1300096 MHz
WDW                   EM
SSB                    0
LB                     0.30 Hz
GB                      0
PC                      1.00
  
```

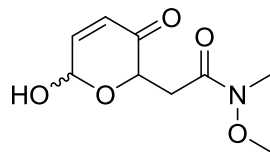

**2k**

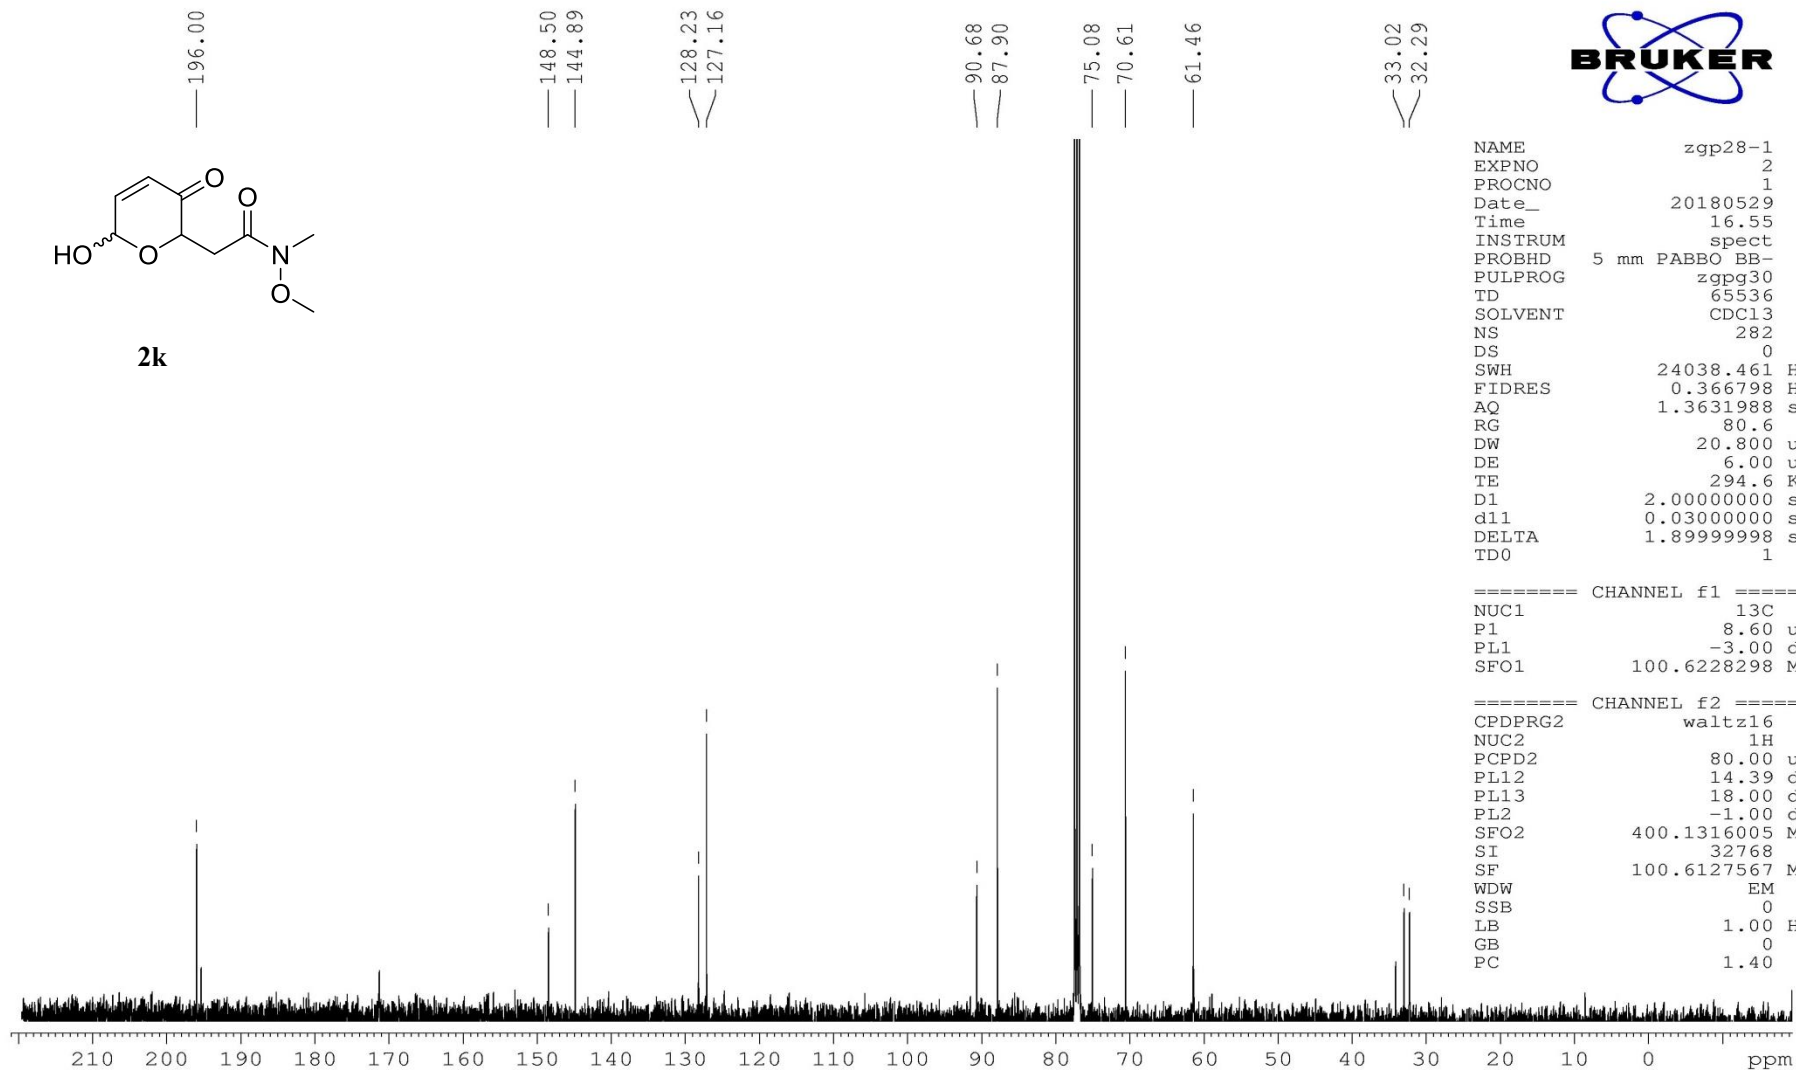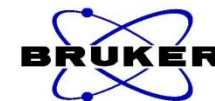

```

NAME          zgp28-1
EXPNO          2
PROCNO         1
Date_         20180529
Time           16.55
INSTRUM        spect
PROBHD         5 mm PABBO BB-
PULPROG        zgpg30
TD             65536
SOLVENT        CDCl3
NS             282
DS             0
SWH            24038.461 Hz
FIDRES         0.366798 Hz
AQ            1.3631988 sec
RG             80.6
DW            20.800 usec
DE             6.00 usec
TE            294.6 K
D1            2.00000000 sec
d11           0.03000000 sec
DELTA         1.89999998 sec
TD0            1
  
```

```

===== CHANNEL f1 =====
NUC1           13C
P1             8.60 usec
PL1           -3.00 dB
SFO1          100.6228298 MHz
  
```

```

===== CHANNEL f2 =====
CPDPRG2        waltz16
NUC2            1H
PCPD2          80.00 usec
PL12           14.39 dB
PL13           18.00 dB
PL2            -1.00 dB
SFO2          400.1316005 MHz
SI             32768
SF            100.6127567 MHz
WDW             EM
SSB             0
LB             1.00 Hz
GB             0
PC             1.40
  
```



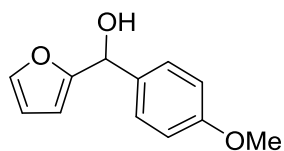

**11**

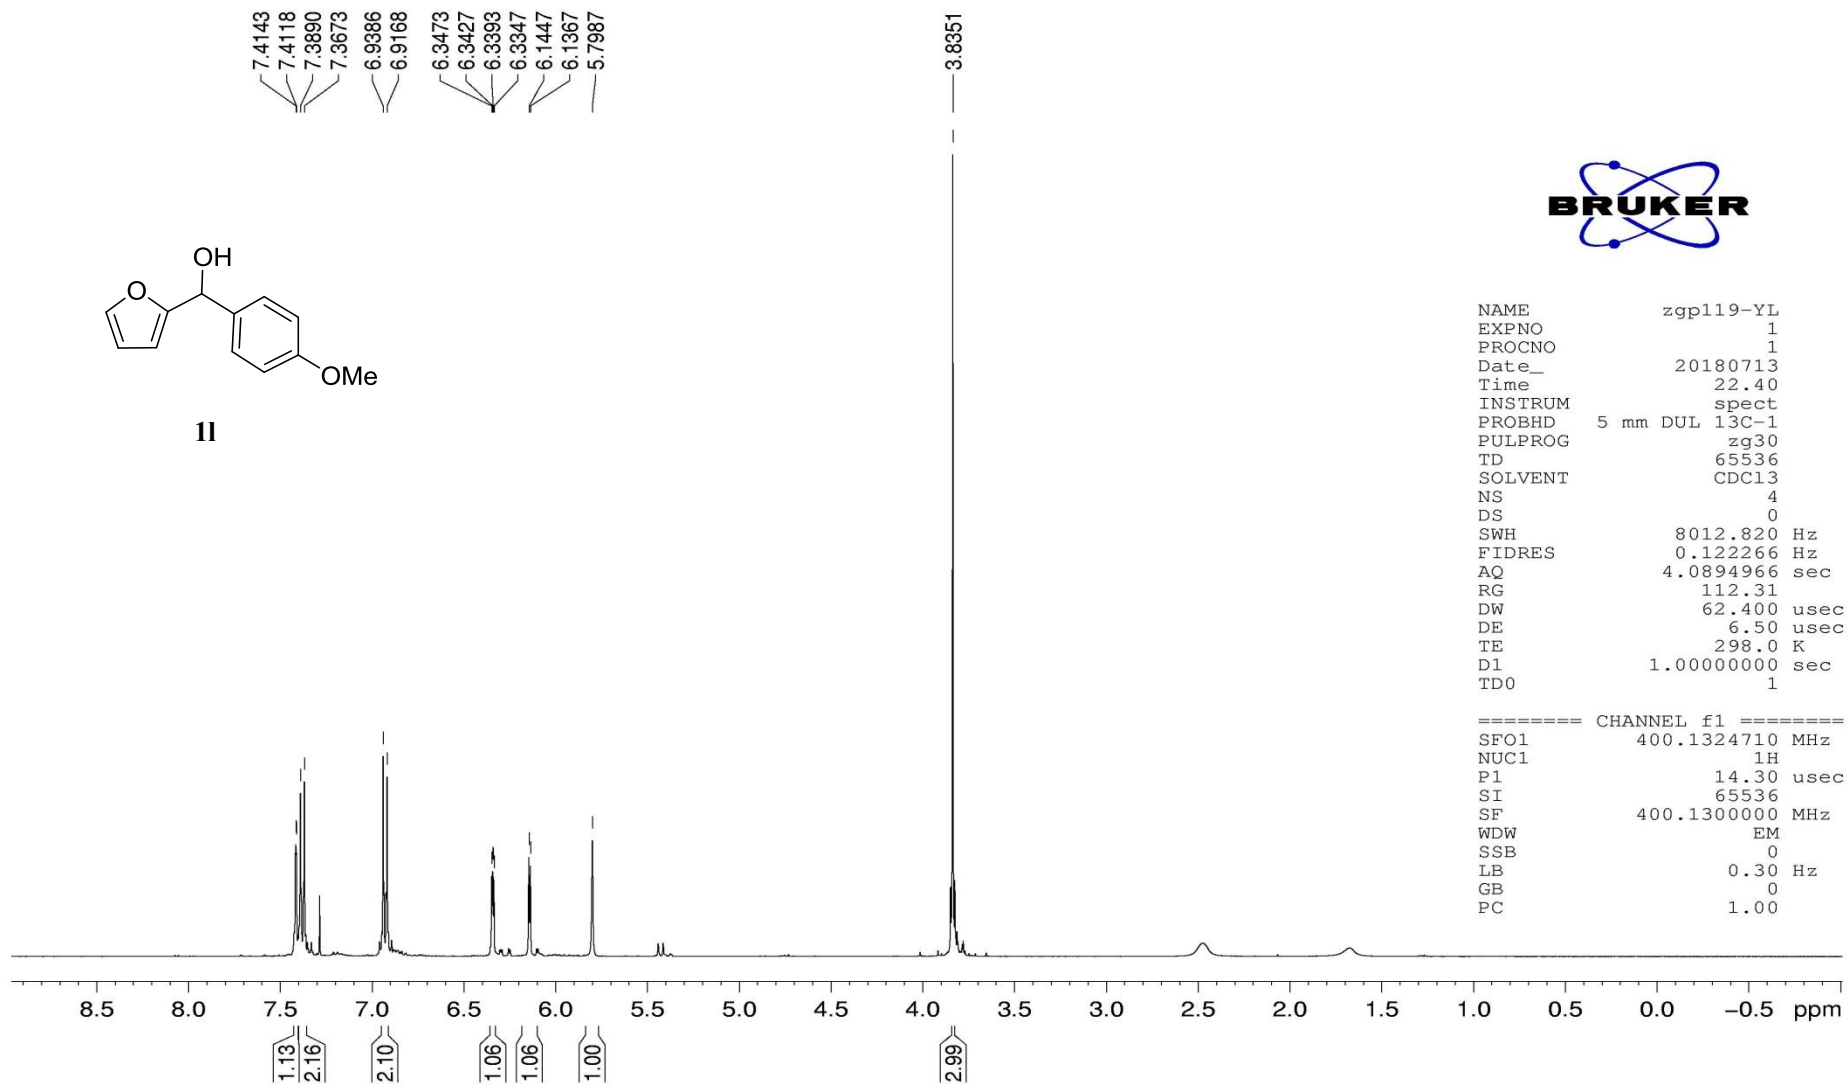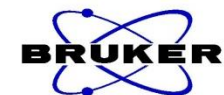

```

NAME          zgp119-YL
EXPNO          1
PROCNO         1
Date_          20180713
Time           22.40
INSTRUM        spect
PROBHD         5 mm DUL 13C-1
PULPROG        zg30
TD             65536
SOLVENT        CDCl3
NS             4
DS             0
SWH            8012.820 Hz
FIDRES         0.122266 Hz
AQ            4.0894966 sec
RG            112.31
DW            62.400 usec
DE            6.50 usec
TE            298.0 K
D1            1.00000000 sec
TD0           1

===== CHANNEL f1 =====
SFO1          400.1324710 MHz
NUC1           1H
P1            14.30 usec
SI            65536
SF            400.1300000 MHz
WDW           EM
SSB           0
LB            0.30 Hz
GB            0
PC            1.00
  
```

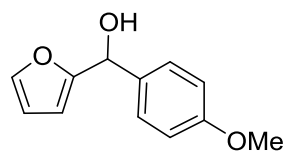

**11**

—159.44  
—156.23

—142.46

—133.12

—127.97

—113.88

—110.21

—107.22

—69.84

—55.31

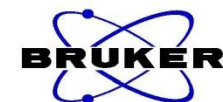

```

NAME          zgp119-YL
EXPNO          2
PROCNO         1
Date_          20180713
Time           22.45
INSTRUM        spect
PROBHD         5 mm DUL 13C-1
PULPROG        zgpg30
TD             65536
SOLVENT        CDCl3
NS             50
DS             0
SWH            24038.461 Hz
FIDRES         0.366798 Hz
AQ            1.3631988 sec
RG            196.92
DW            20.800 usec
DE            6.50 usec
TE            298.4 K
D1            2.0000000 sec
D11           0.0300000 sec
TD0           1
  
```

```

===== CHANNEL f1 =====
SFO1          100.6228298 MHz
NUC1           13C
P1            9.60 usec
SI            32768
SF            100.6127690 MHz
WDW            EM
SSB            0
LB            1.00 Hz
GB            0
PC            1.40
  
```

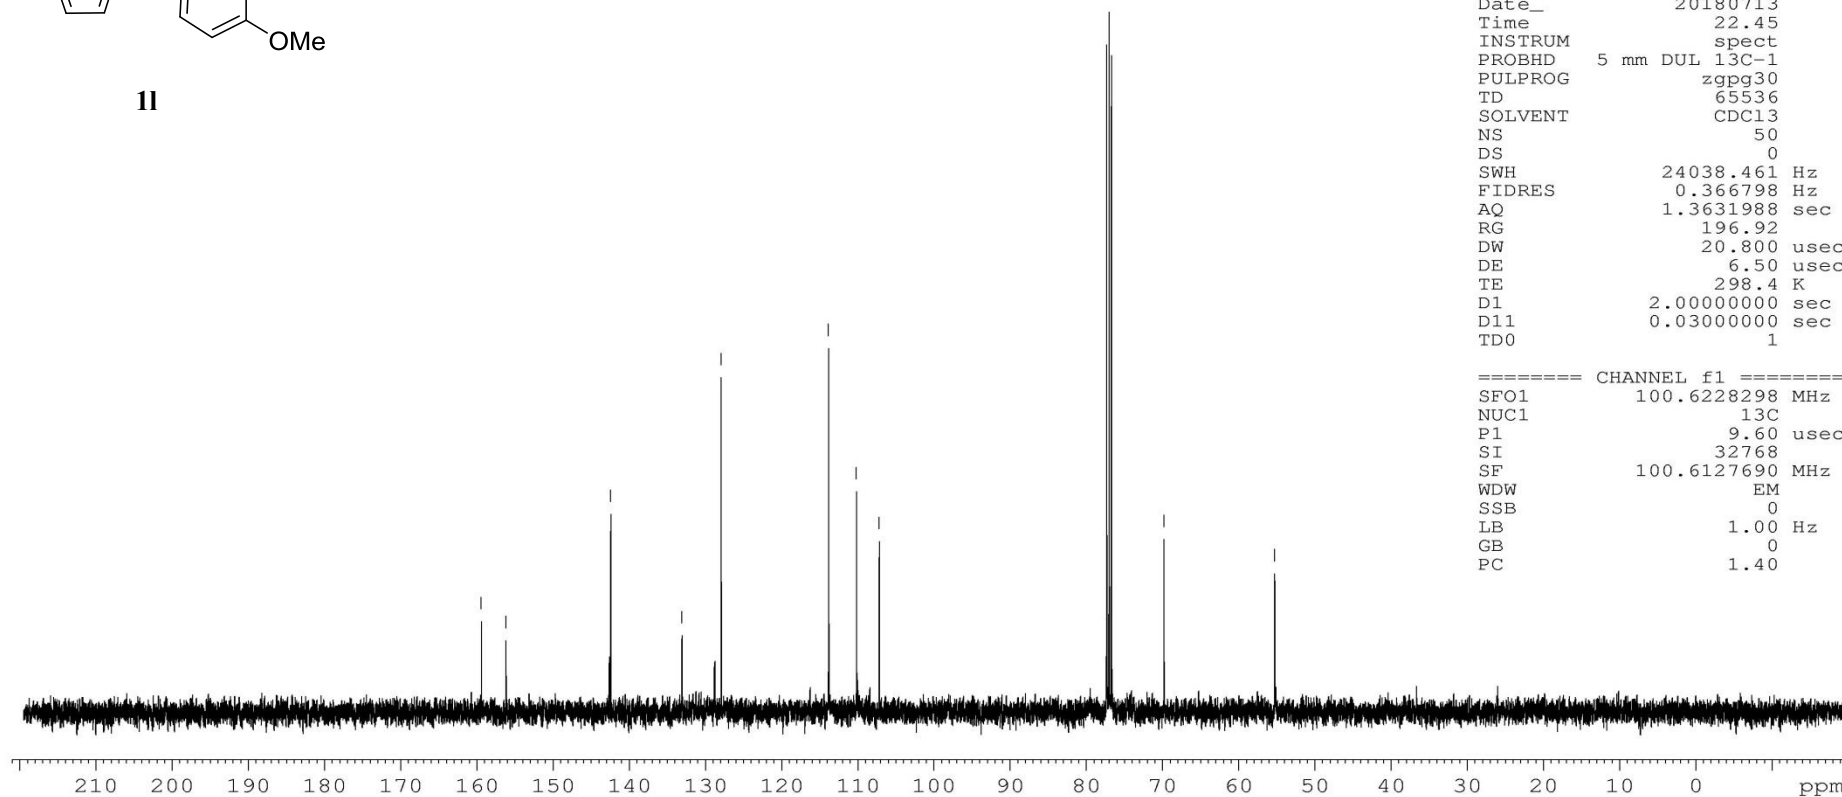

7.3084  
7.3012  
7.2942  
7.2890  
7.2846  
7.2725  
7.2656  
7.0541  
7.0513  
7.0284  
7.0257  
7.0108  
7.0027  
6.9852  
6.9770  
6.9528  
6.9457  
6.9410  
6.9240  
6.9167  
6.3174  
6.3140  
6.2917  
6.2883  
6.2560  
6.2303  
5.8303  
5.7573  
5.7492  
5.5696  
5.0938

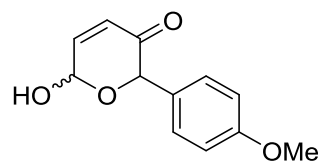

21

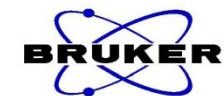

NAME zgpl19  
EXPNO 7  
PROCNO 1  
Date\_ 20180715  
Time 21.05  
INSTRUM spect  
PROBHD 5 mm DUL 13C-1  
PULPROG zg30  
TD 65536  
SOLVENT CDCl3  
NS 3  
DS 0  
SWH 8012.820 Hz  
FIDRES 0.122266 Hz  
AQ 4.0894966 sec  
RG 187.77  
DW 62.400 usec  
DE 6.50 usec  
TE 299.1 K  
D1 1.00000000 sec  
TD0 1

===== CHANNEL f1 =====  
SFO1 400.1324710 MHz  
NUC1 1H  
P1 14.30 usec  
SI 65536  
SF 400.1300000 MHz  
WDW EM  
SSB 0  
LB 0.30 Hz  
GB 0  
PC 1.00

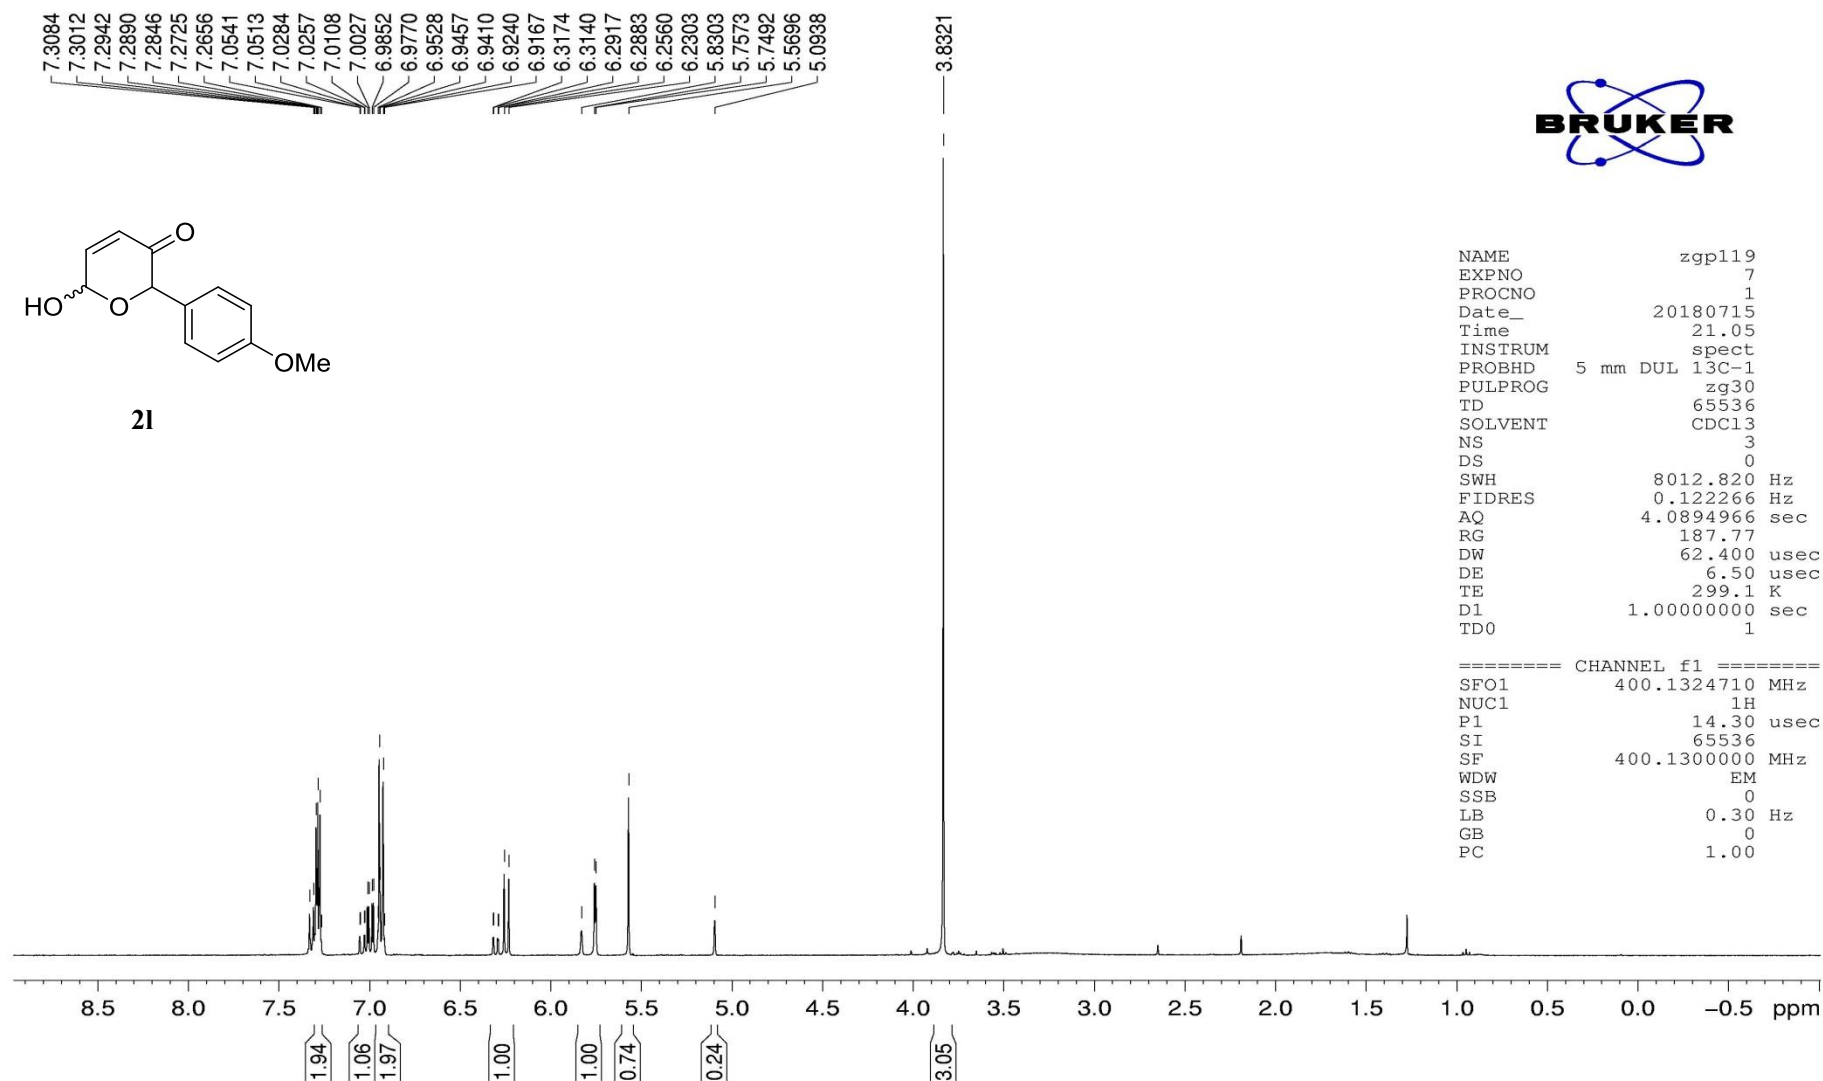

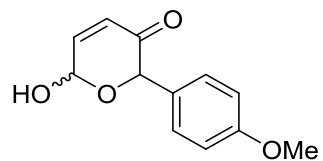

2l

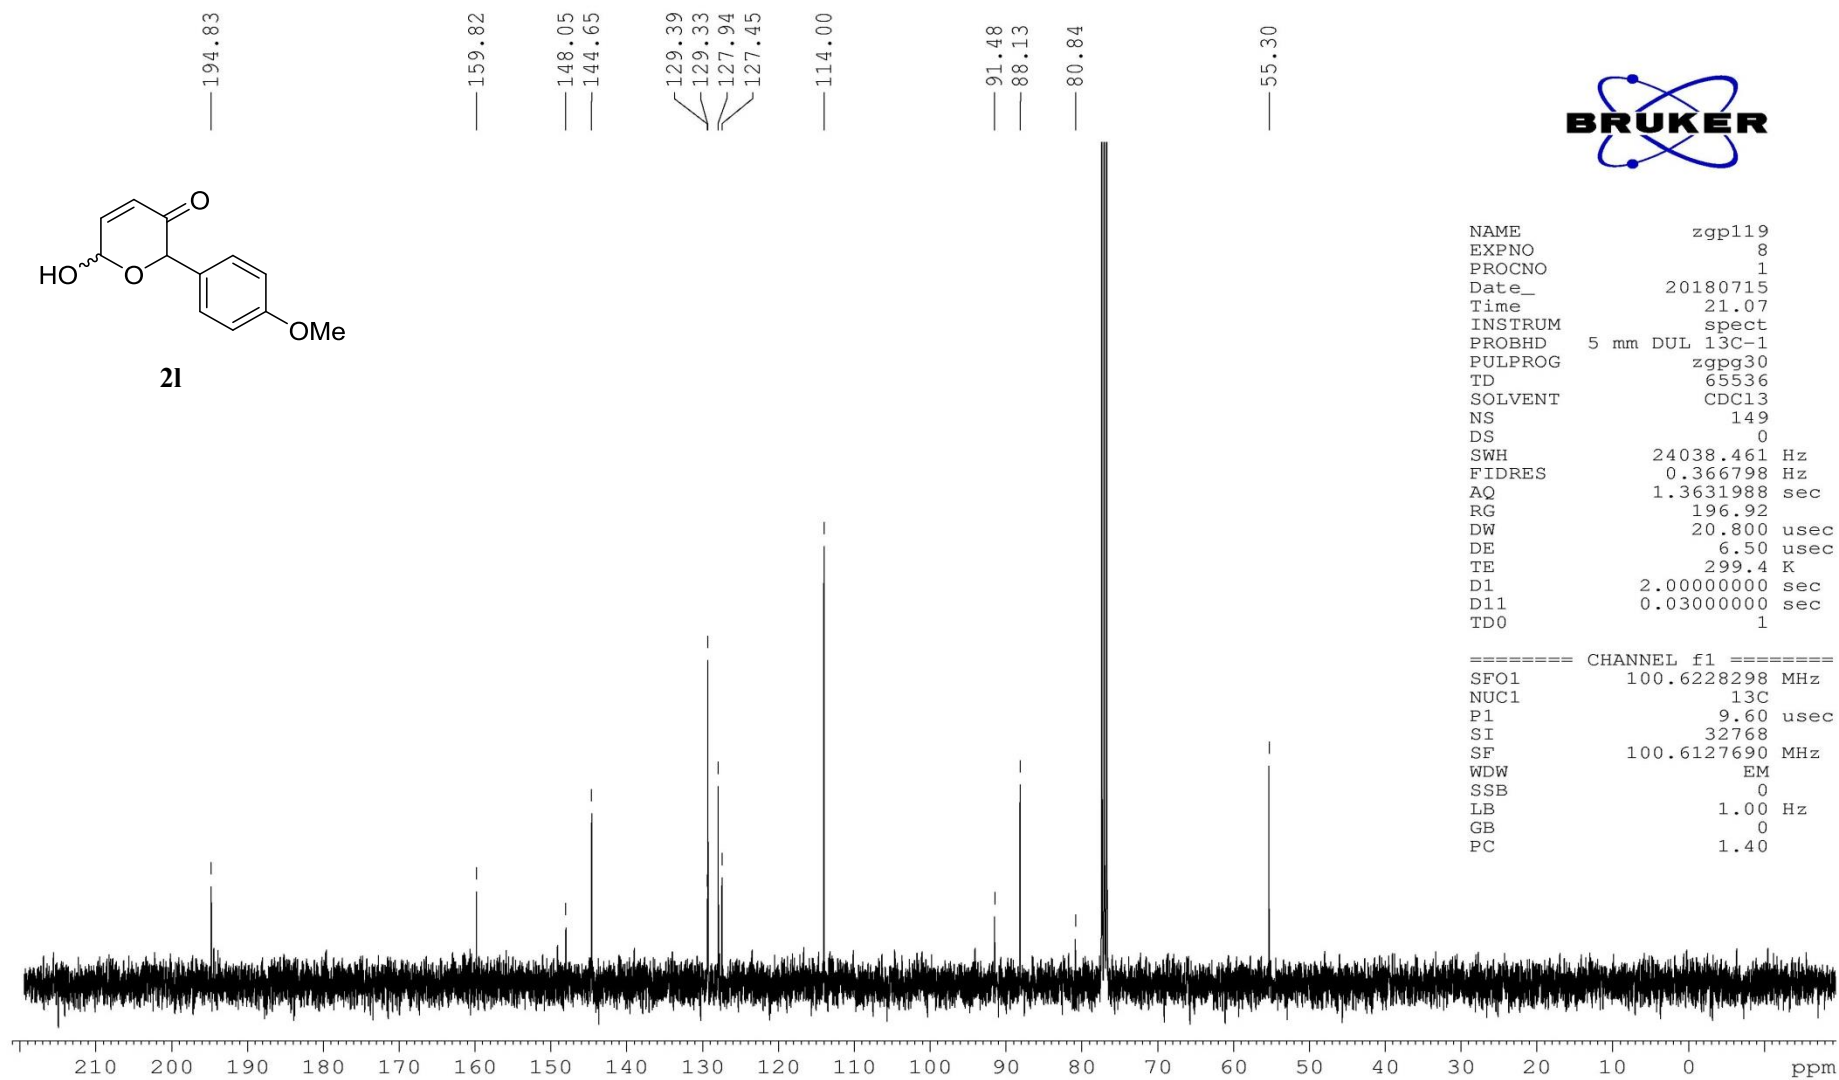

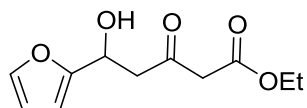

1m

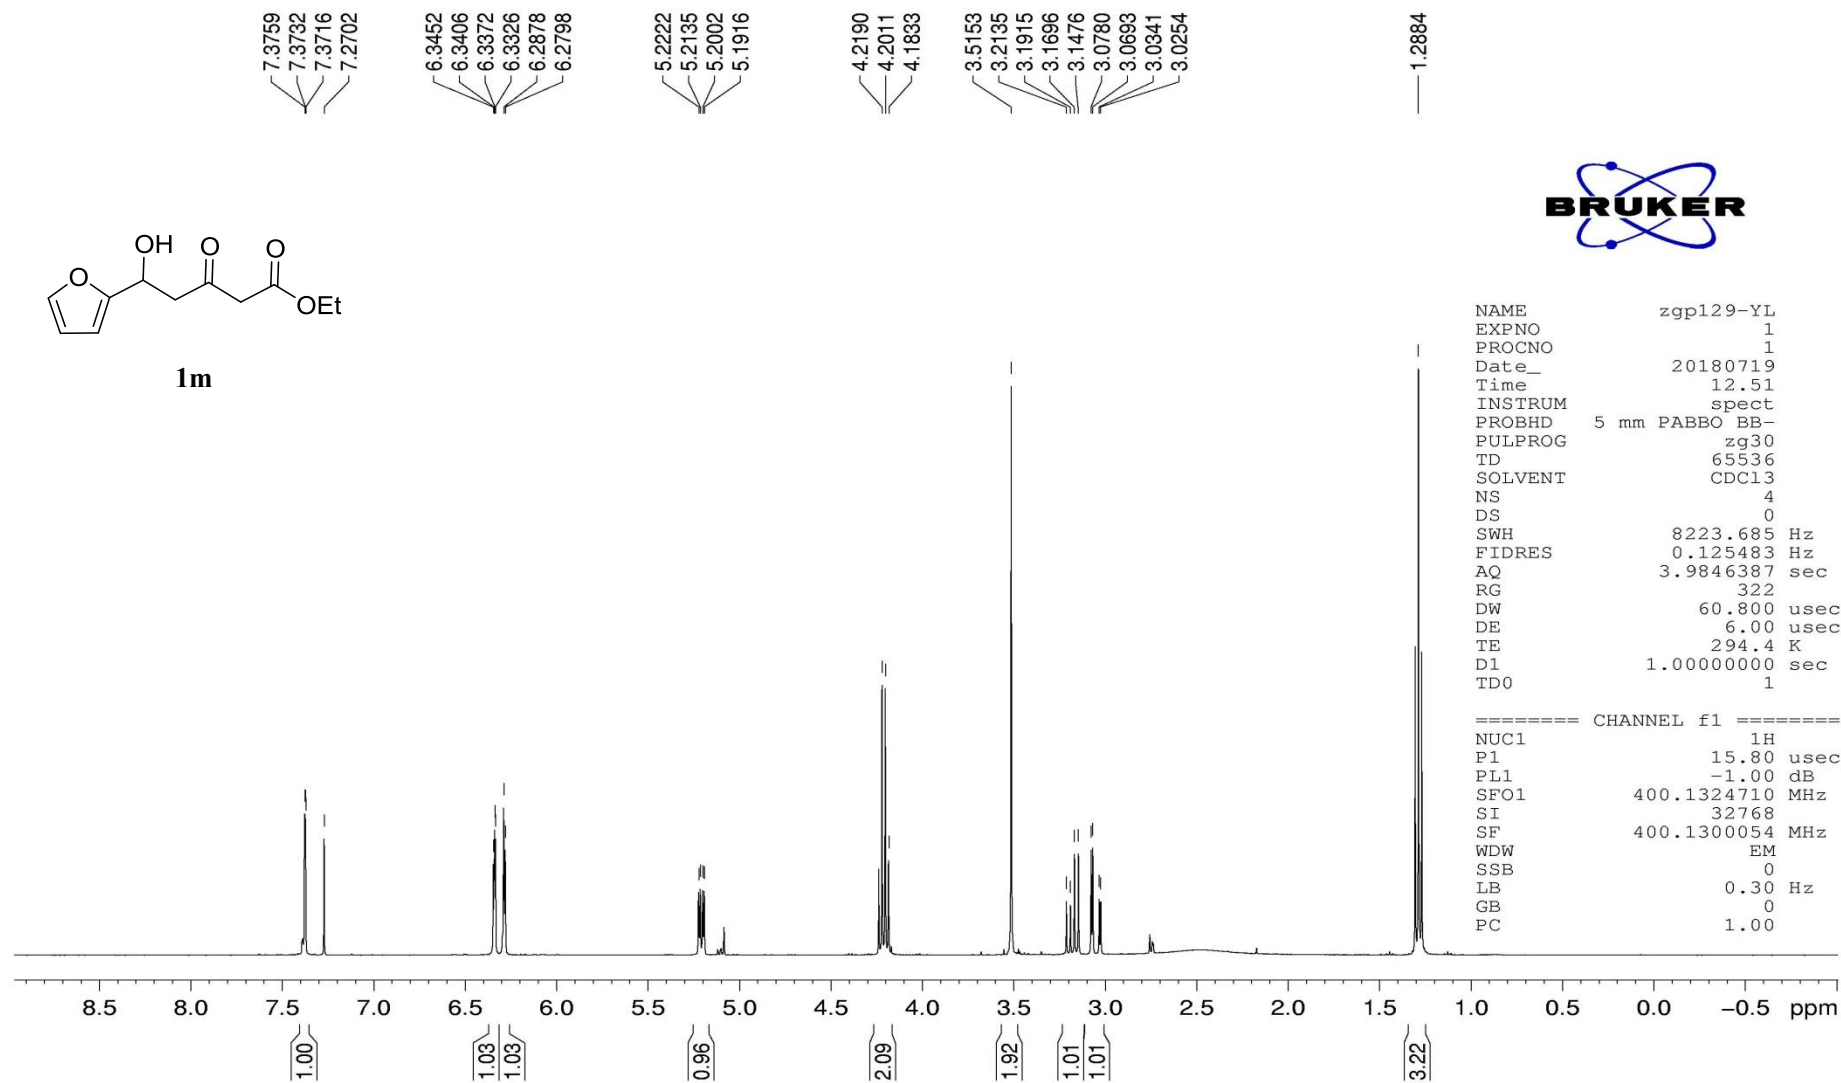

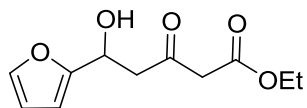

**1m**

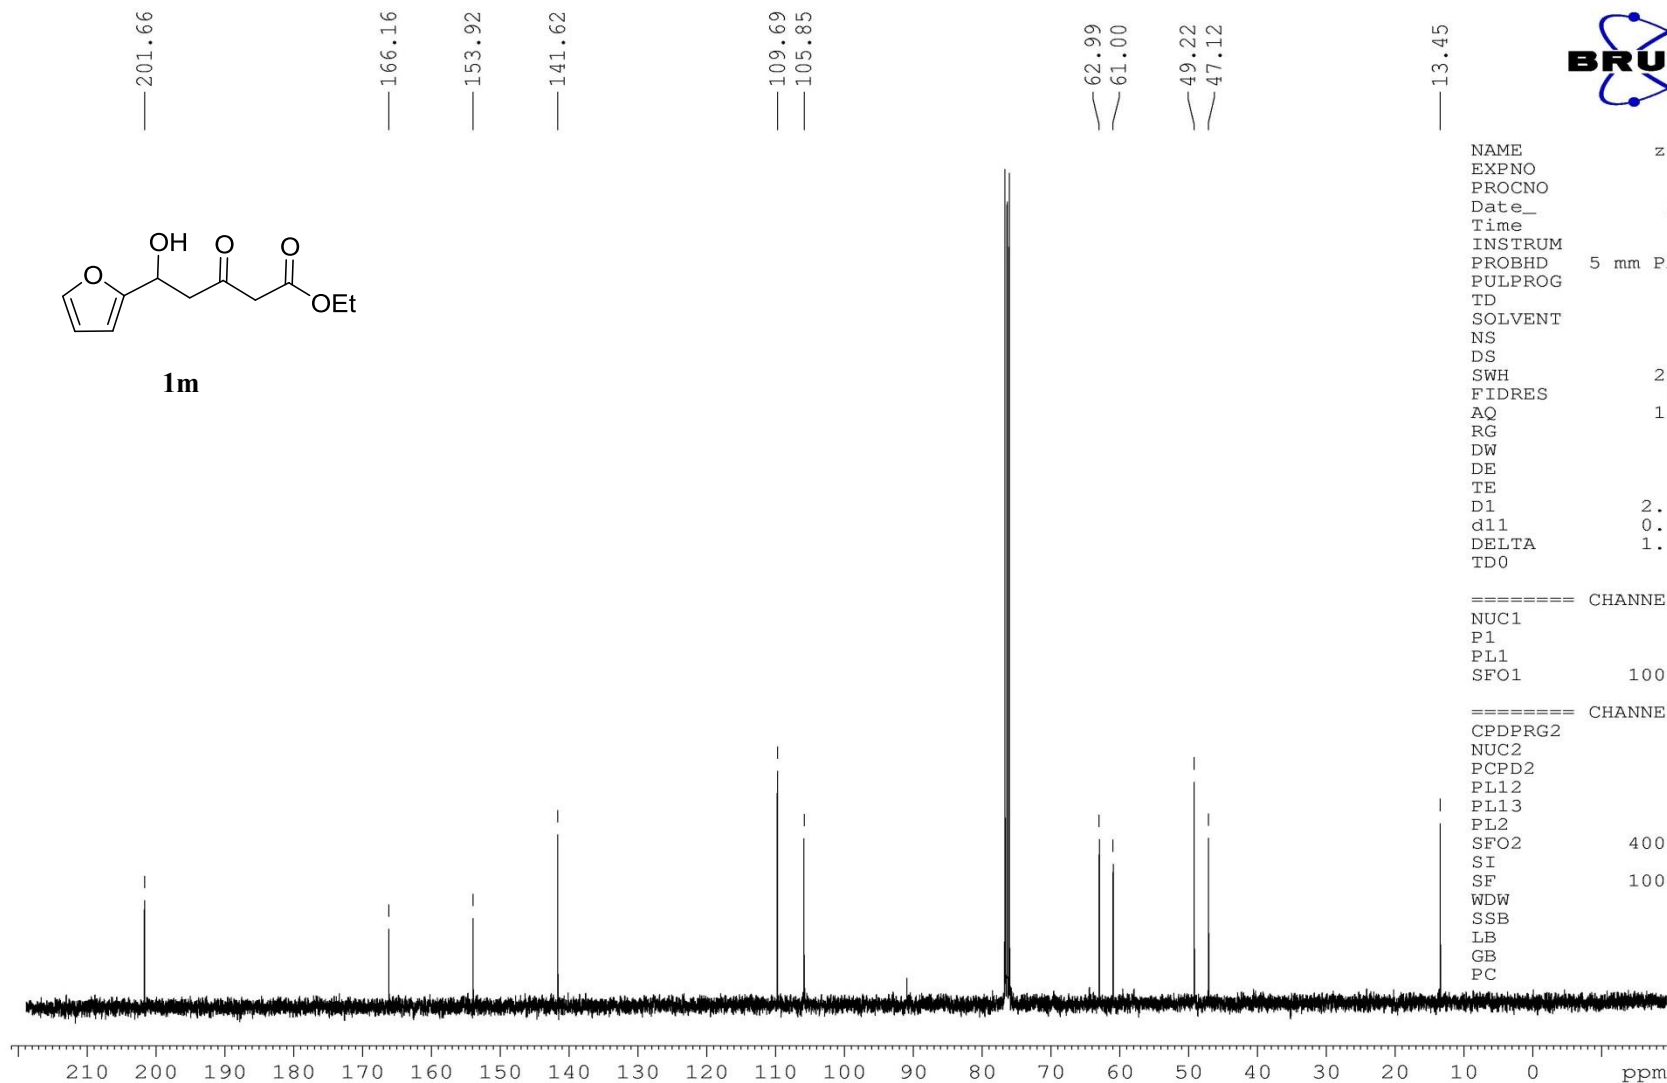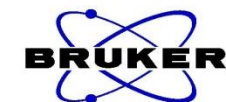

```

NAME          zgp129-YL
EXPNO          2
PROCNO         1
Date_          20180719
Time           12.53
INSTRUM        spect
PROBHD         5 mm PABBO BB-
PULPROG        zgpg30
TD             65536
SOLVENT        CDC13
NS             134
DS             0
SWH            24038.461 Hz
FIDRES         0.366798 Hz
AQ            1.3631988 sec
RG             114
DW            20.800 usec
DE             6.00 usec
TE            294.8 K
D1            2.00000000 sec
d11            0.03000000 sec
DELTA          1.89999998 sec
TD0            1
  
```

```

===== CHANNEL f1 =====
NUC1           13C
P1             8.60 usec
PL1            -3.00 dB
SFO1           100.6228298 MHz
  
```

```

===== CHANNEL f2 =====
CPDPRG2        waltz16
NUC2            1H
PCPD2          80.00 usec
PL12           14.39 dB
PL13           18.00 dB
PL2            -1.00 dB
SFO2           400.1316005 MHz
SI             32768
SF            100.6128330 MHz
WDW            EM
SSB            0
LB             1.00 Hz
GB             0
PC             1.40
  
```

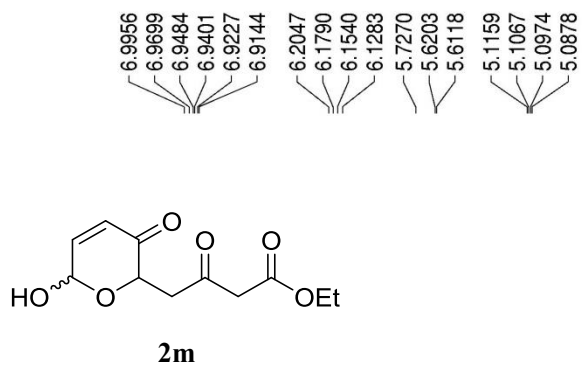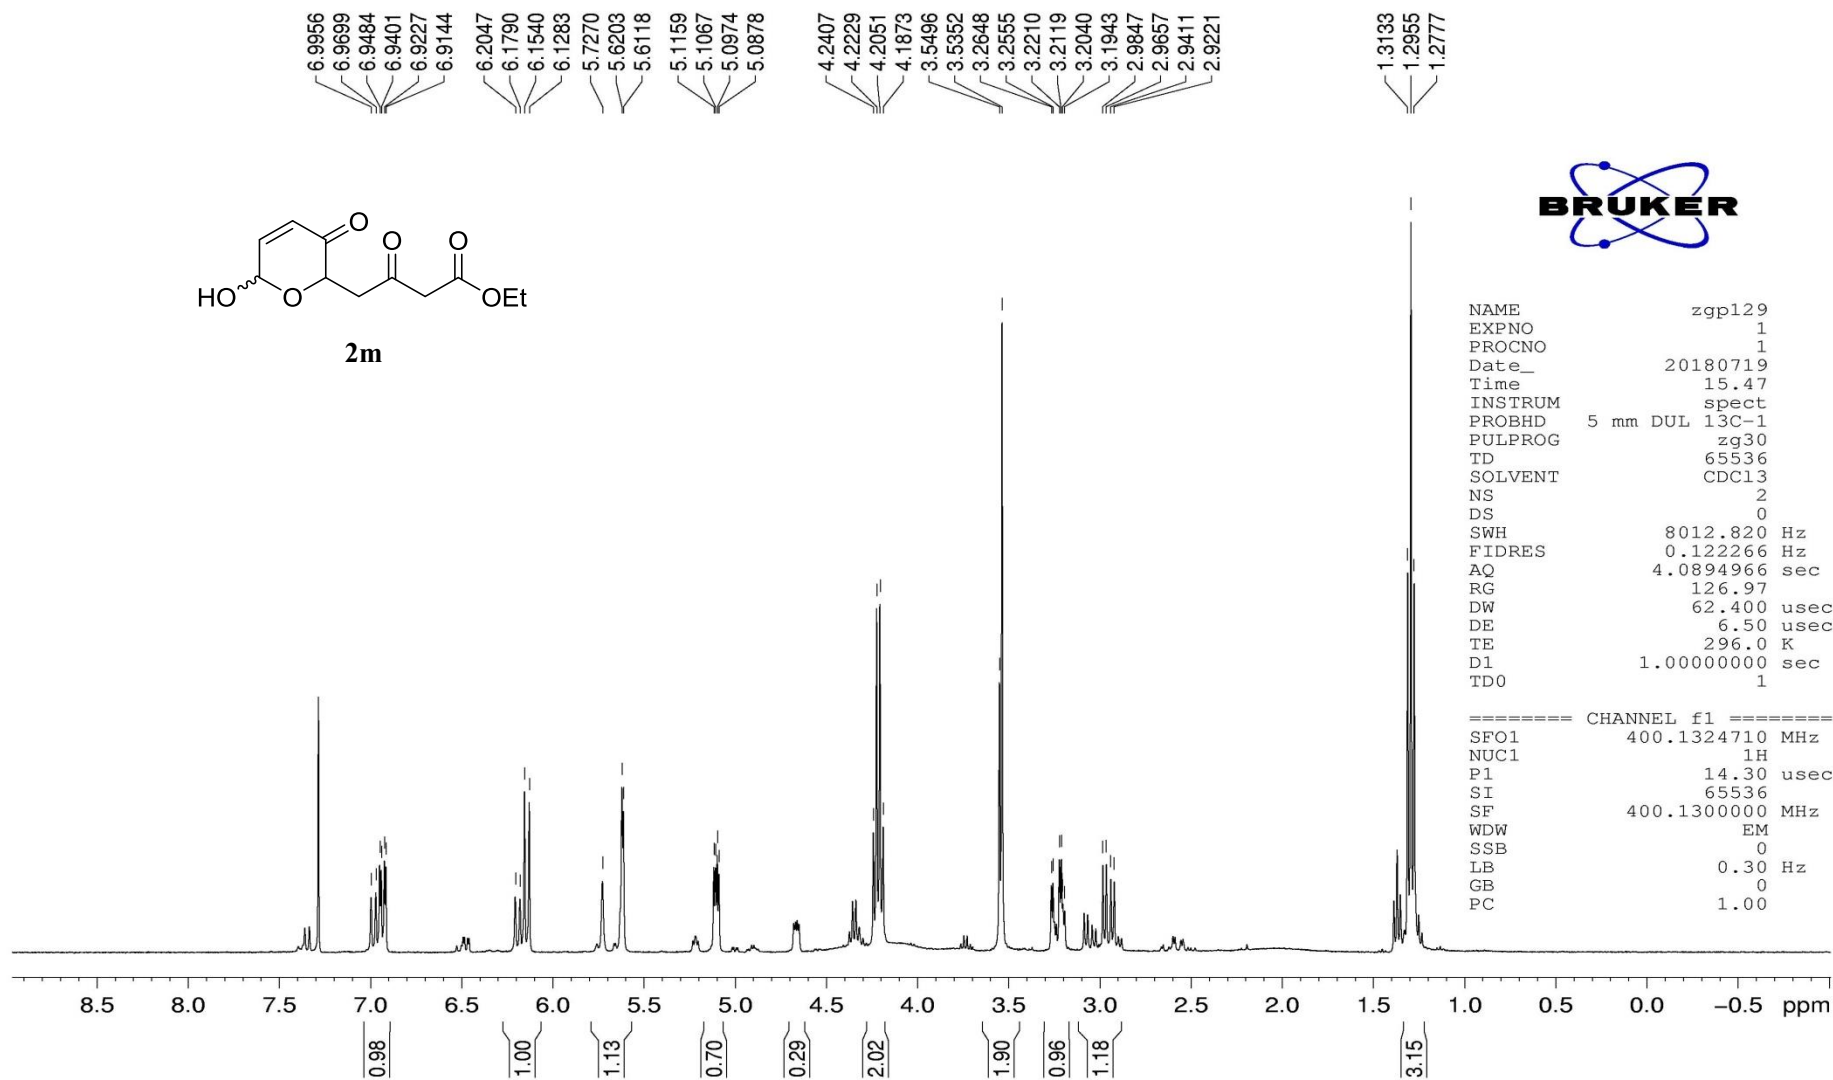

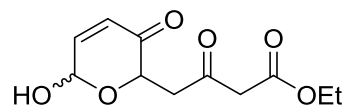

2m

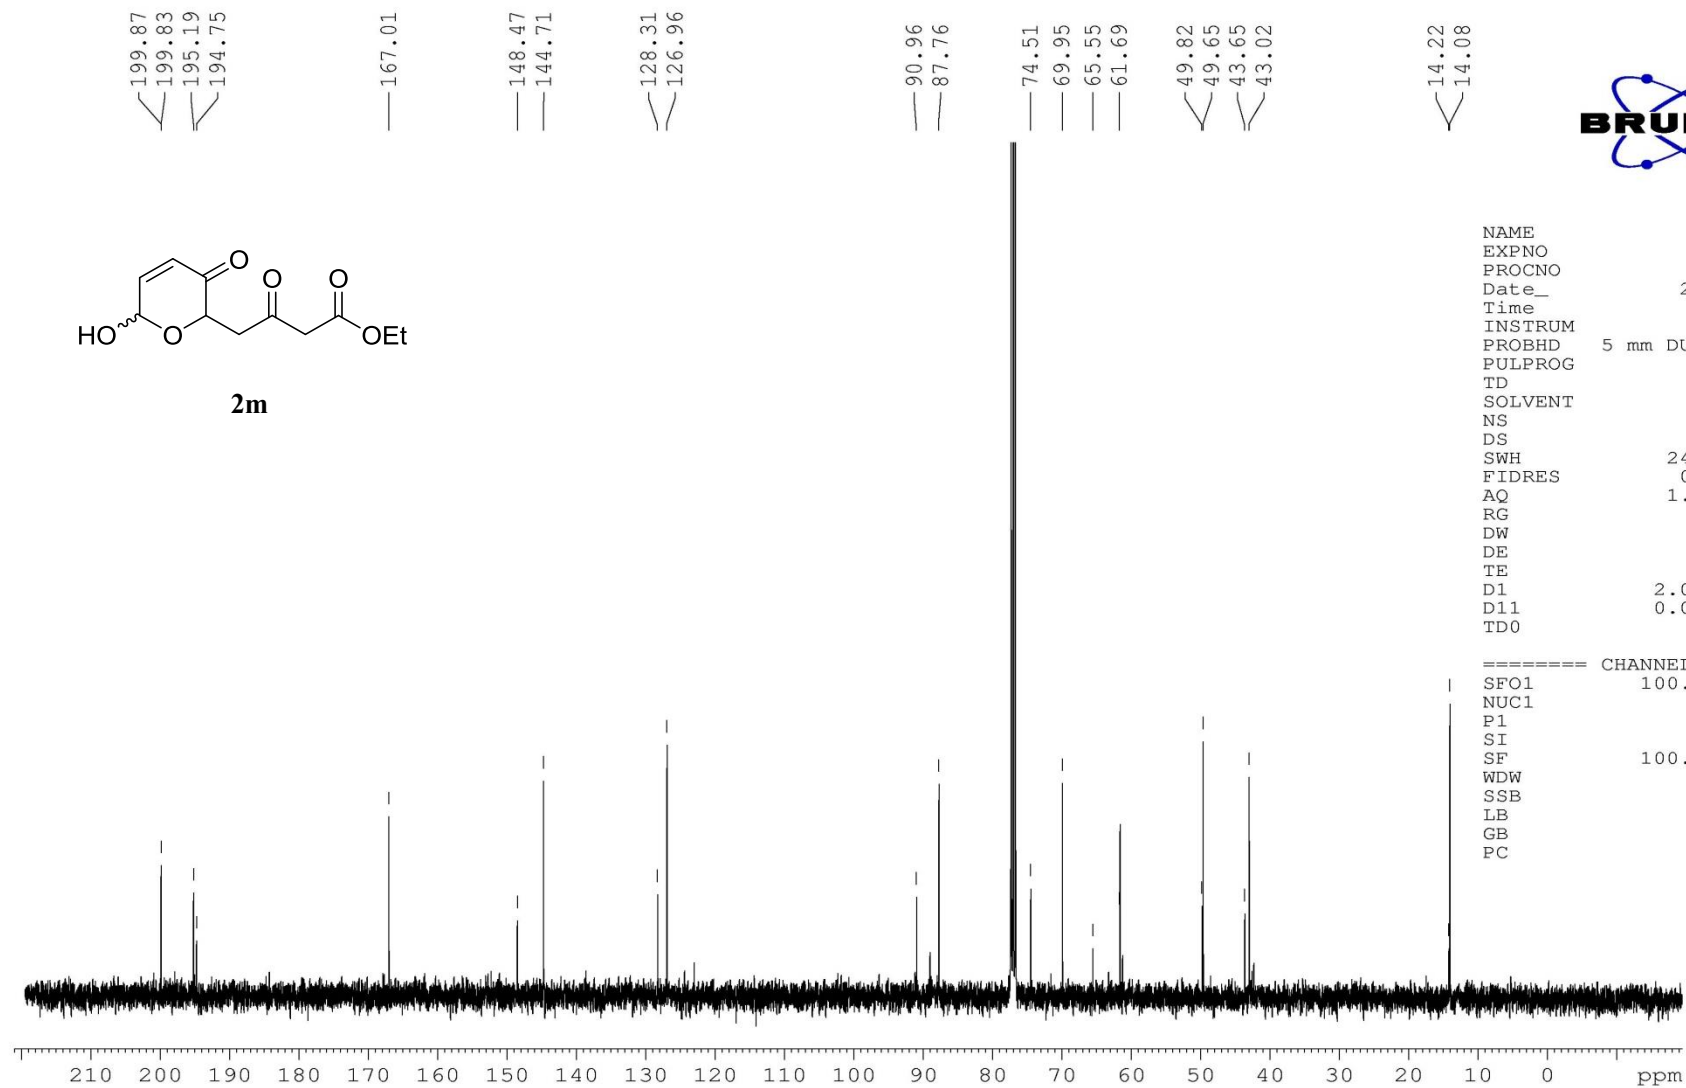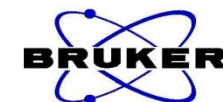

```

NAME                zgp129
EXPNO                2
PROCNO              1
Date_               20180719
Time                15.55
INSTRUM             spect
PROBHD              5 mm DUL 13C-1
PULPROG             zgpg30
TD                  65536
SOLVENT             CDC13
NS                   231
DS                   0
SWH                 24038.461 Hz
FIDRES              0.366798 Hz
AQ                  1.3631988 sec
RG                   196.92
DW                  20.800 usec
DE                   6.50 usec
TE                  296.6 K
D1                   2.00000000 sec
D11                  0.03000000 sec
TD0                  1
  
```

```

===== CHANNEL f1 =====
SFO1                100.6228298 MHz
NUC1                 13C
P1                   9.60 usec
SI                   32768
SF                  100.6127690 MHz
WDW                  EM
SSB                   0
LB                   1.00 Hz
GB                   0
PC                   1.40
  
```



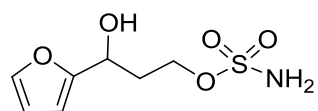

**1n**

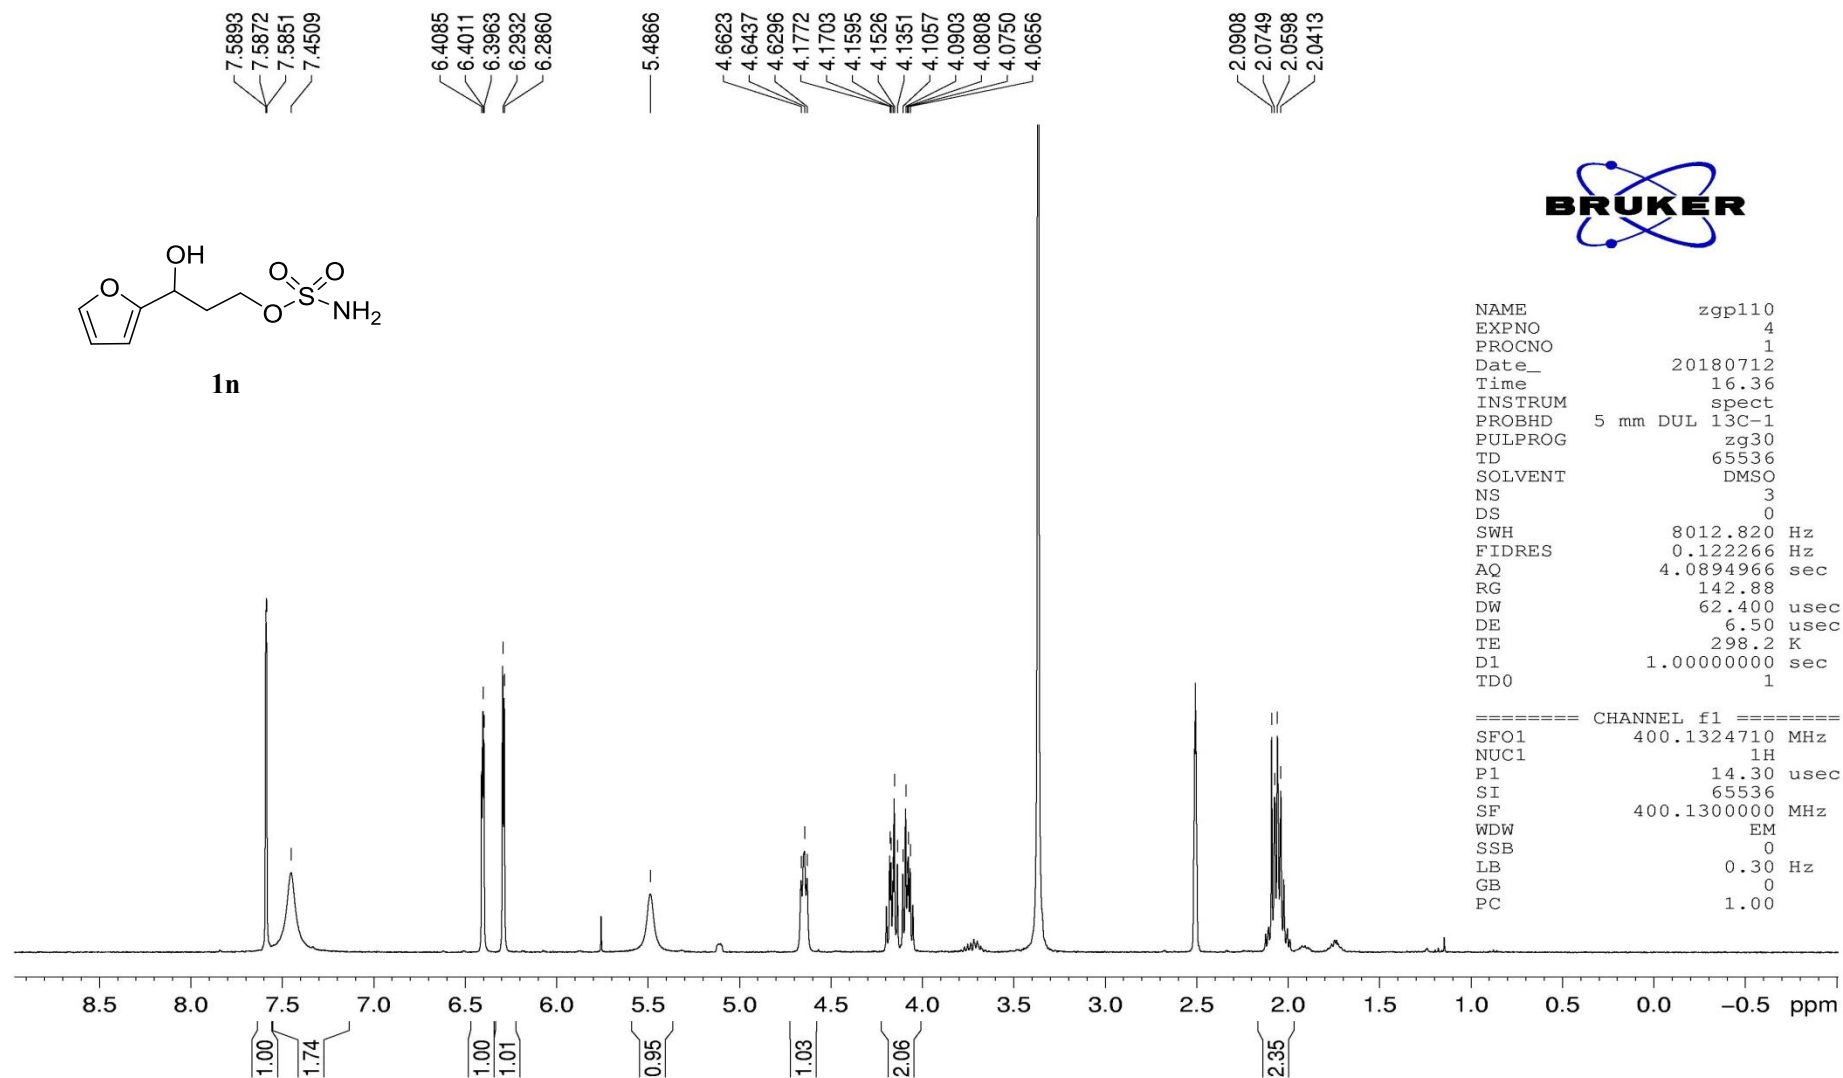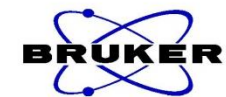

```

NAME                zgp110
EXPNO                4
PROCNO              1
Date_               20180712
Time                16.36
INSTRUM             spect
PROBHD              5 mm DUL 13C-1
PULPROG             zg30
TD                  65536
SOLVENT             DMSO
NS                   3
DS                   0
SWH                 8012.820 Hz
FIDRES              0.122266 Hz
AQ                  4.0894966 sec
RG                  142.88
DW                  62.400 usec
DE                   6.50 usec
TE                  298.2 K
D1                  1.00000000 sec
TD0                  1

===== CHANNEL f1 =====
SFO1                400.1324710 MHz
NUC1                 1H
P1                   14.30 usec
SI                   65536
SF                  400.1300000 MHz
WDW                  EM
SSB                   0
LB                   0.30 Hz
GB                   0
PC                   1.00
  
```

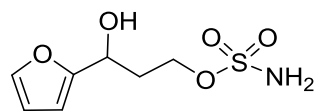

**1n**

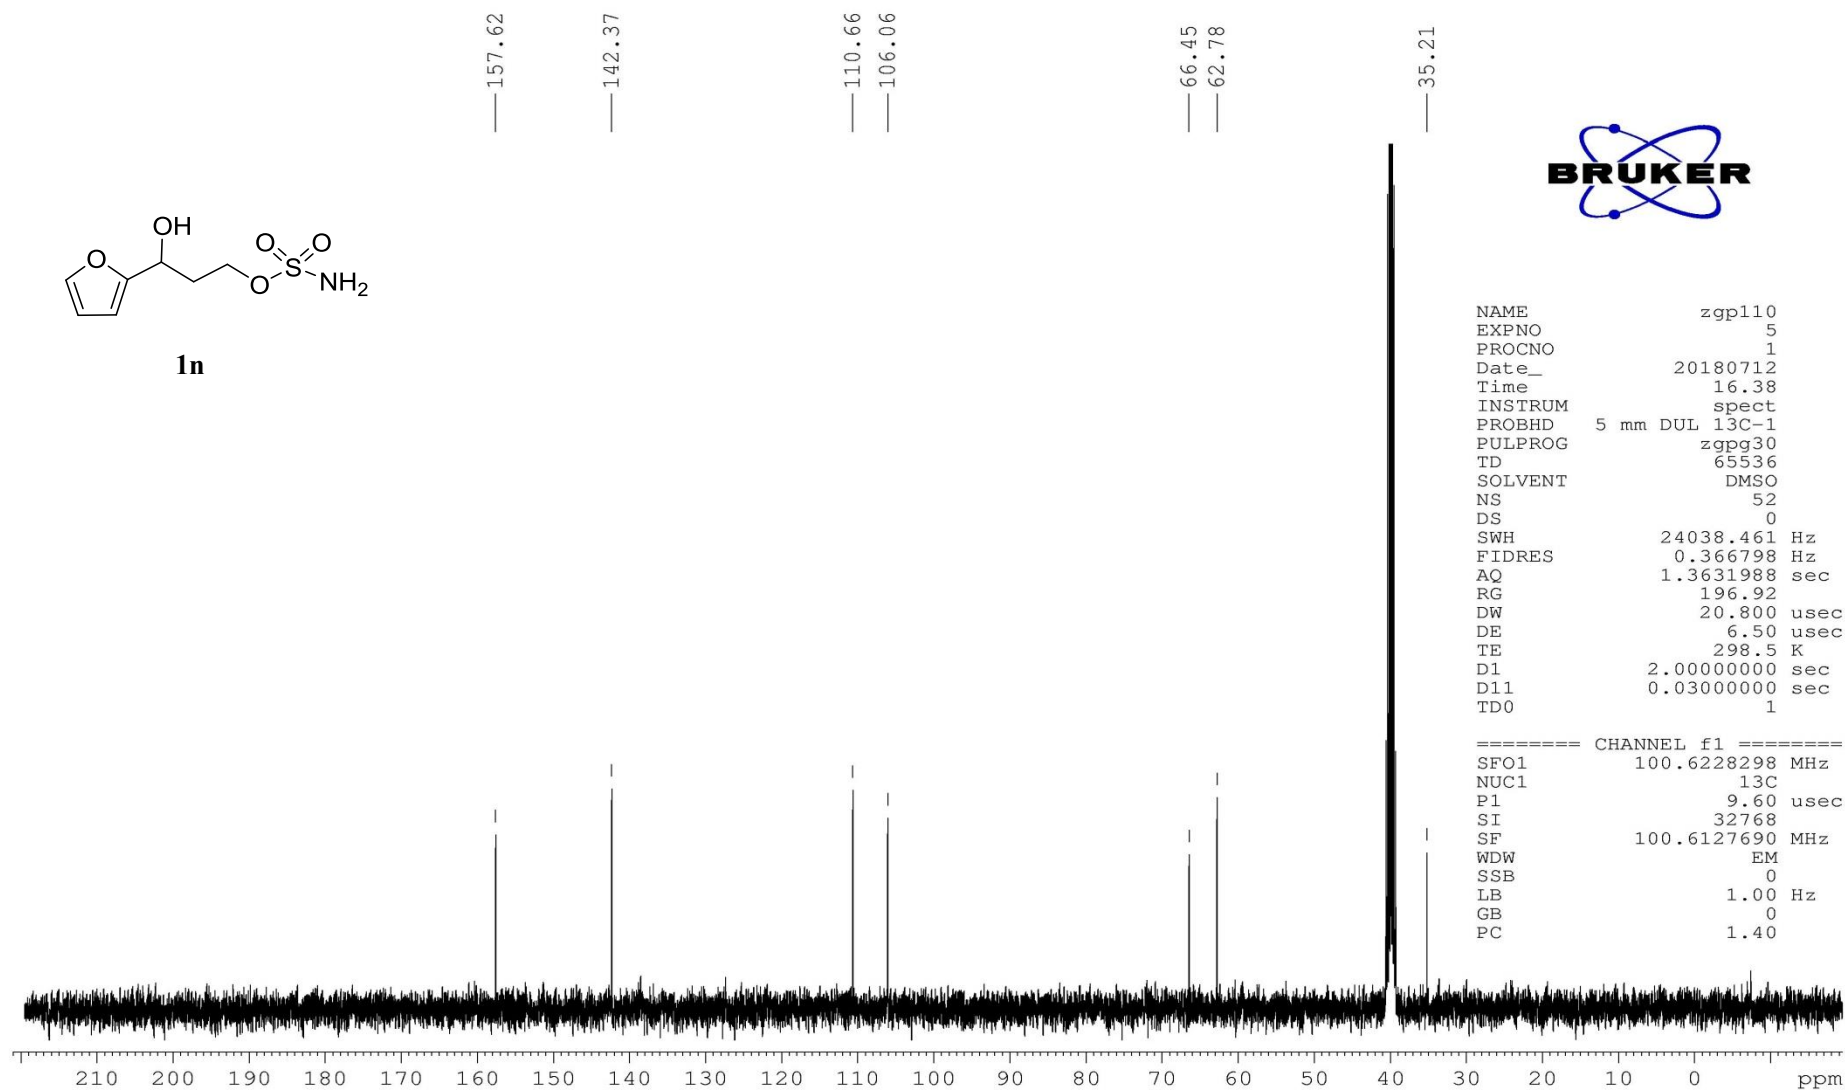

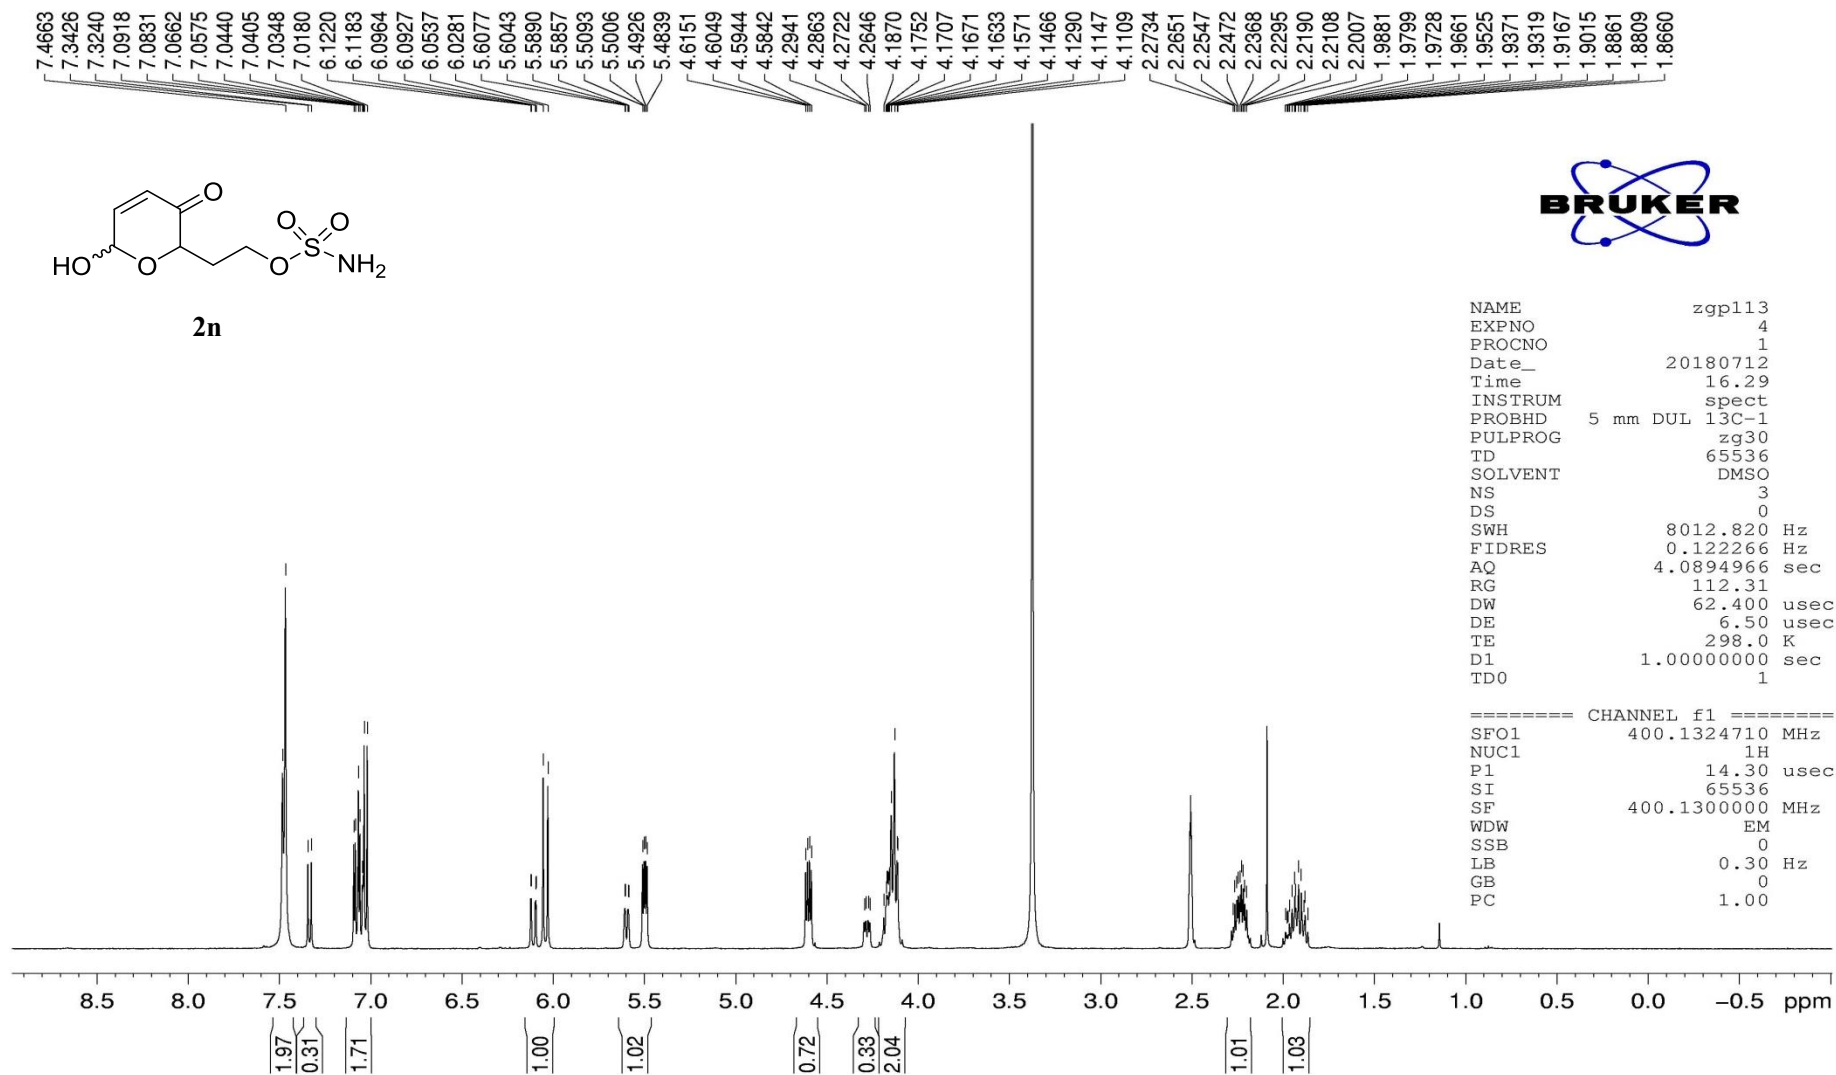

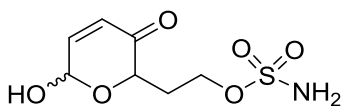

2n

196.75  
196.48

151.88  
148.31

127.68  
125.99

90.87  
87.20

74.62  
70.10  
65.82  
65.77

30.25  
29.59

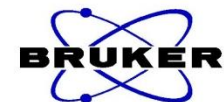

NAME zgp113  
EXPNO 5  
PROCNO 1  
Date\_ 20180712  
Time 16.32  
INSTRUM spect  
PROBHD 5 mm DUL 13C-1  
PULPROG zgpg30  
TD 65536  
SOLVENT DMSO  
NS 78  
DS 0  
SWH 24038.461 Hz  
FIDRES 0.366798 Hz  
AQ 1.3631988 sec  
RG 196.92  
DW 20.800 usec  
DE 6.50 usec  
TE 298.4 K  
D1 2.00000000 sec  
D11 0.03000000 sec  
TD0 1

===== CHANNEL f1 =====  
SFO1 100.6228298 MHz  
NUC1 13C  
P1 9.60 usec  
SI 32768  
SF 100.6127690 MHz  
WDW EM  
SSB 0  
LB 1.00 Hz  
GB 0  
PC 1.40

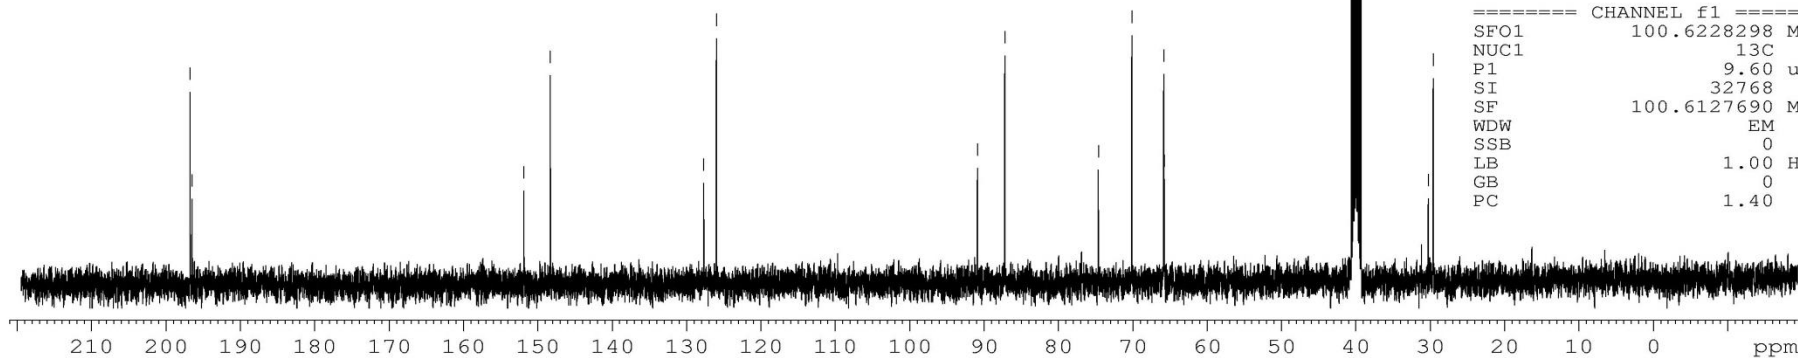

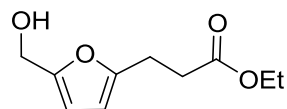

**1o**

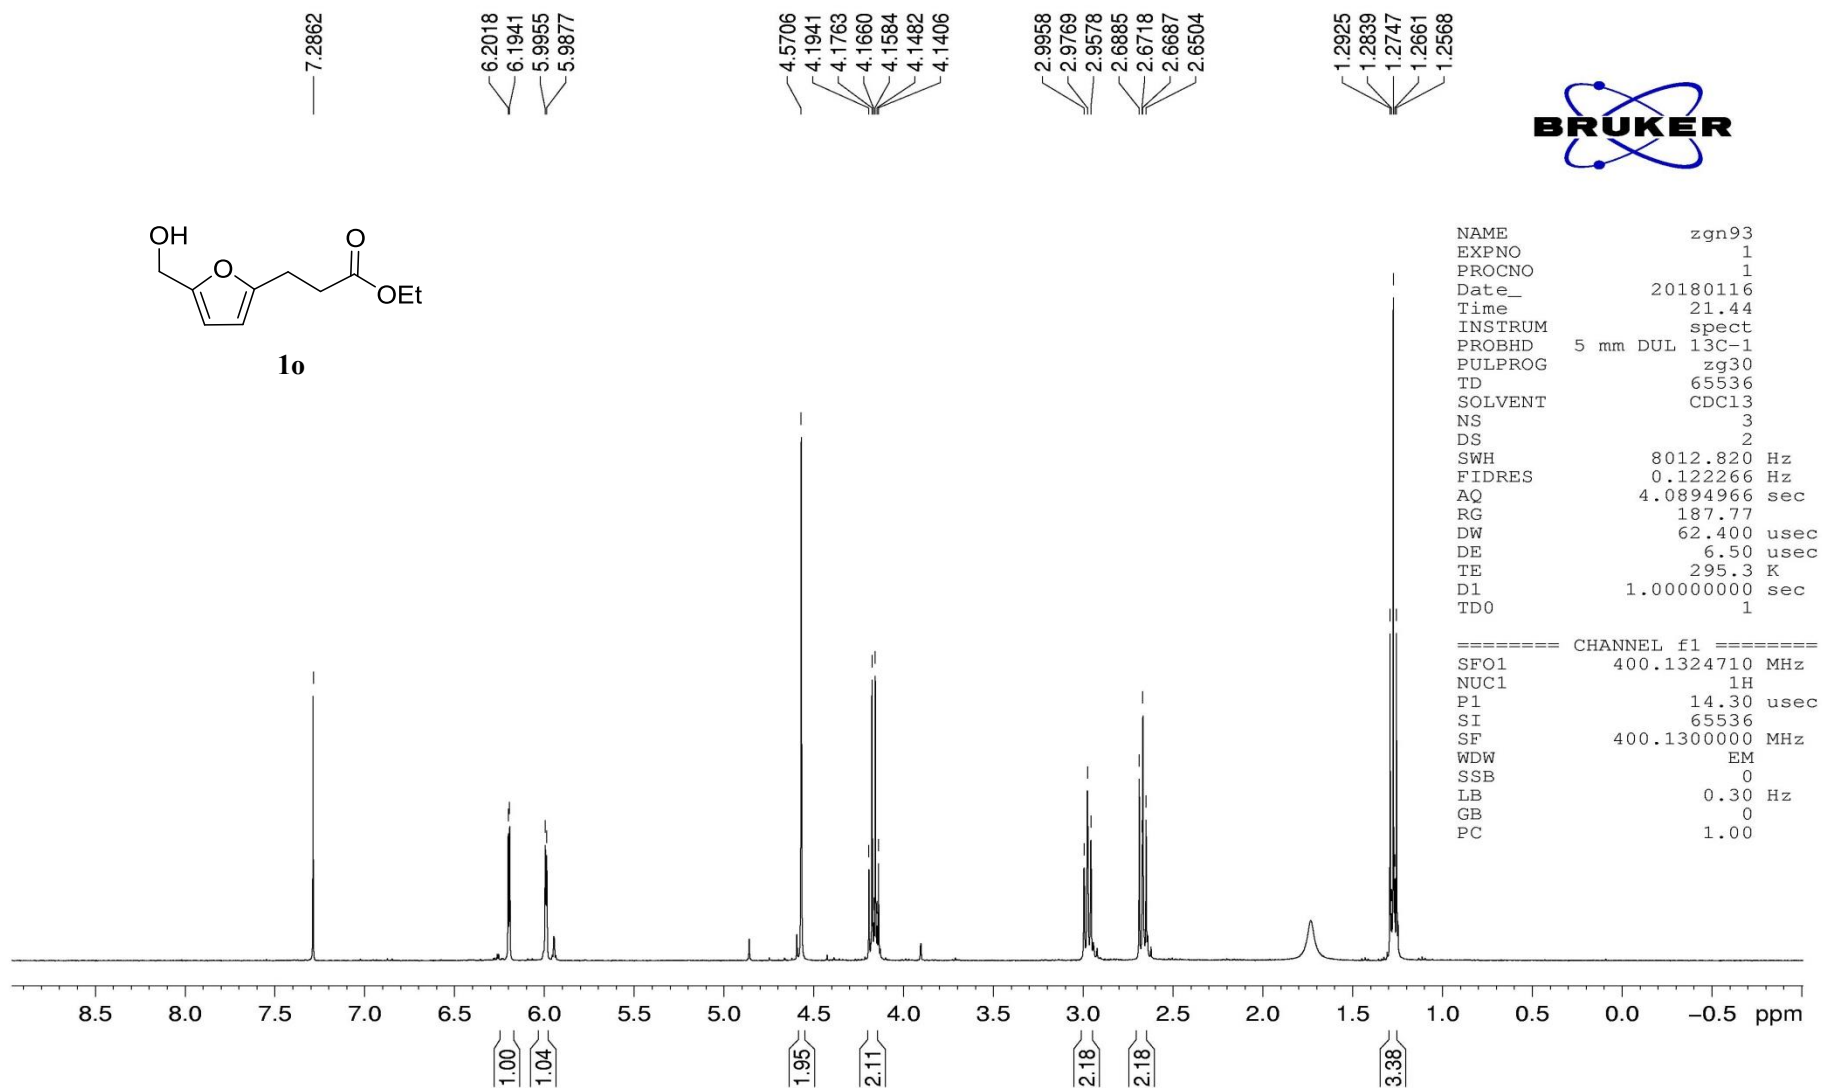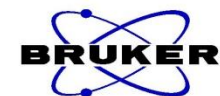

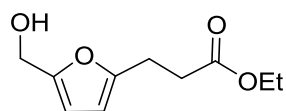

**1o**

—172.65

—154.60  
—152.78

—108.76  
—106.24

—60.72  
—57.68

—32.78

—23.68

—14.34

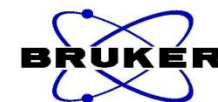

```

NAME                zgn93
EXPNO                2
PROCNO              1
Date_              20180117
Time              18.05
INSTRUM            spect
PROBHD             5 mm DUL 13C-1
PULPROG            zgpg30
TD                65536
SOLVENT            CDCl3
NS                 168
DS                  2
SWH                24038.461 Hz
FIDRES             0.366798 Hz
AQ                1.3631988 sec
RG                 196.92
DW                20.800 usec
DE                 6.50 usec
TE                 295.7 K
D1                2.00000000 sec
D11               0.03000000 sec
TD0                1
  
```

```

===== CHANNEL f1 =====
SFO1             100.6228298 MHz
NUC1              13C
P1                9.60 usec
SI                32768
SF              100.6127562 MHz
WDW               EM
SSB               0
LB                1.00 Hz
GB               0
PC               1.40
  
```

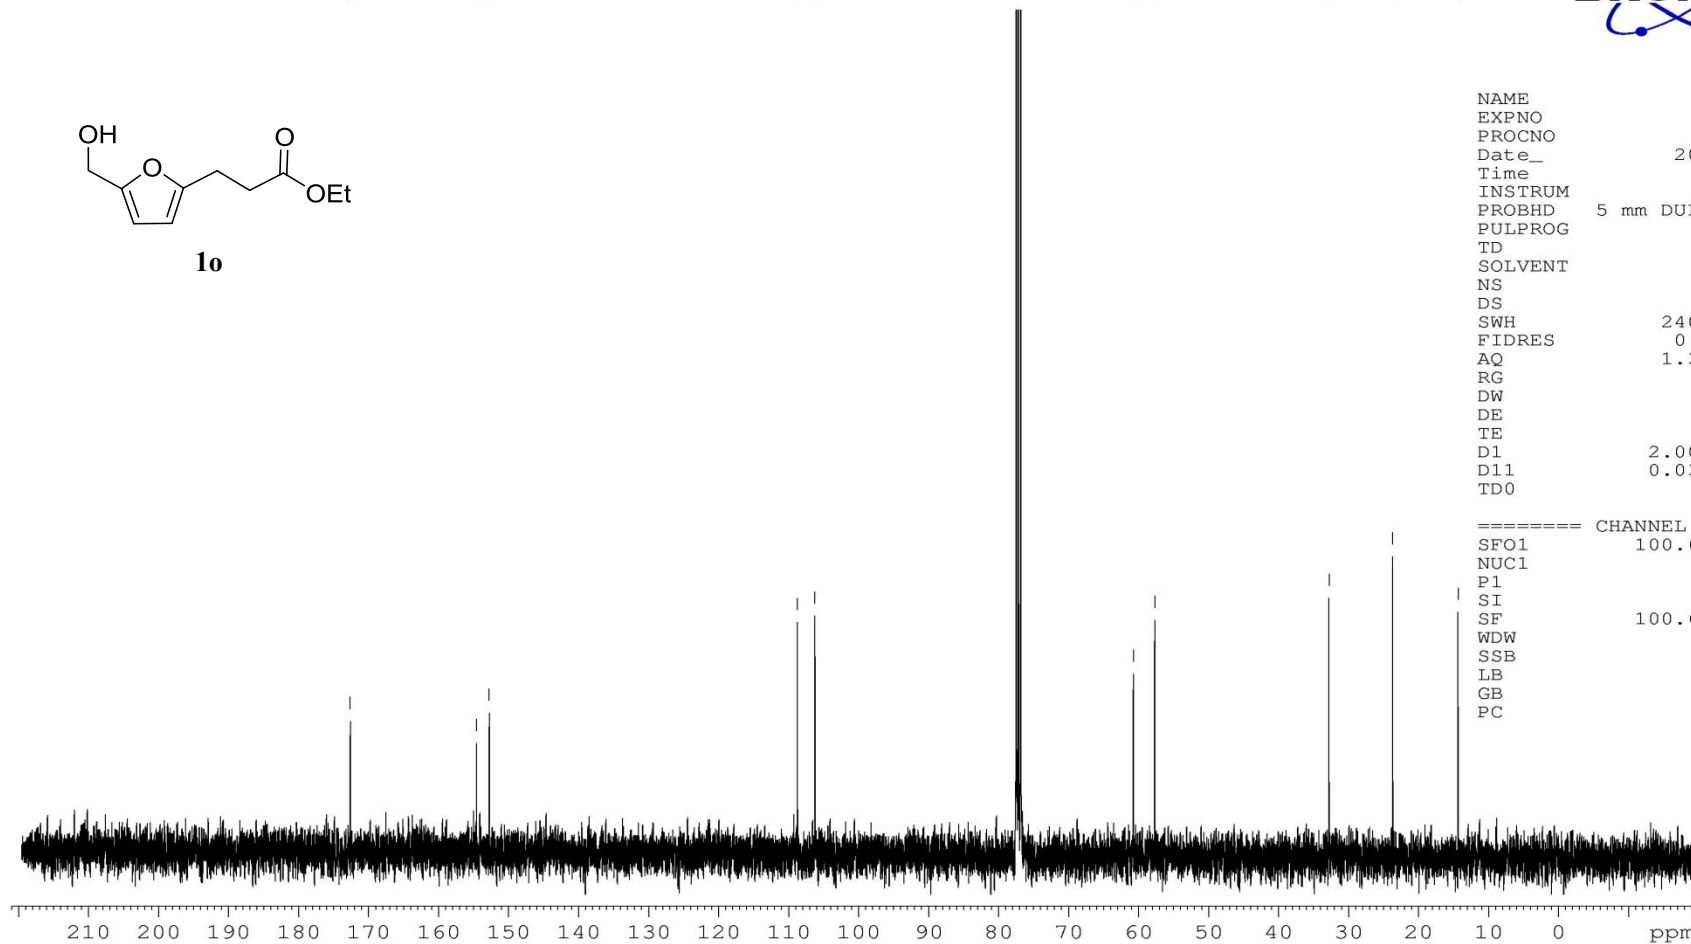

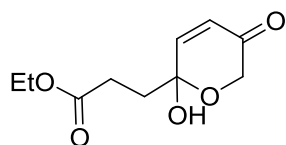

2o

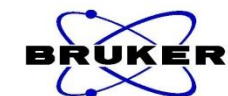

```

NAME                zgp51-2
EXPNO                5
PROCNO              1
Date_               20180613
Time                16.47
INSTRUM             spect
PROBHD              5 mm DUL 13C-1
PULPROG             zg30
TD                  65536
SOLVENT             CDCl3
NS                   3
DS                   0
SWH                  8012.820 Hz
FIDRES              0.122266 Hz
AQ                   4.0894966 sec
RG                   142.88
DW                   62.400 usec
DE                   6.50 usec
TE                   295.1 K
D1                   1.00000000 sec
TD0                  1

===== CHANNEL f1 =====
SFO1                 400.1324710 MHz
NUC1                  1H
P1                    14.30 usec
SI                   65536
SF                   400.1300126 MHz
WDW                   EM
SSB                    0
LB                    0.30 Hz
GB                    0
PC                    1.00
  
```

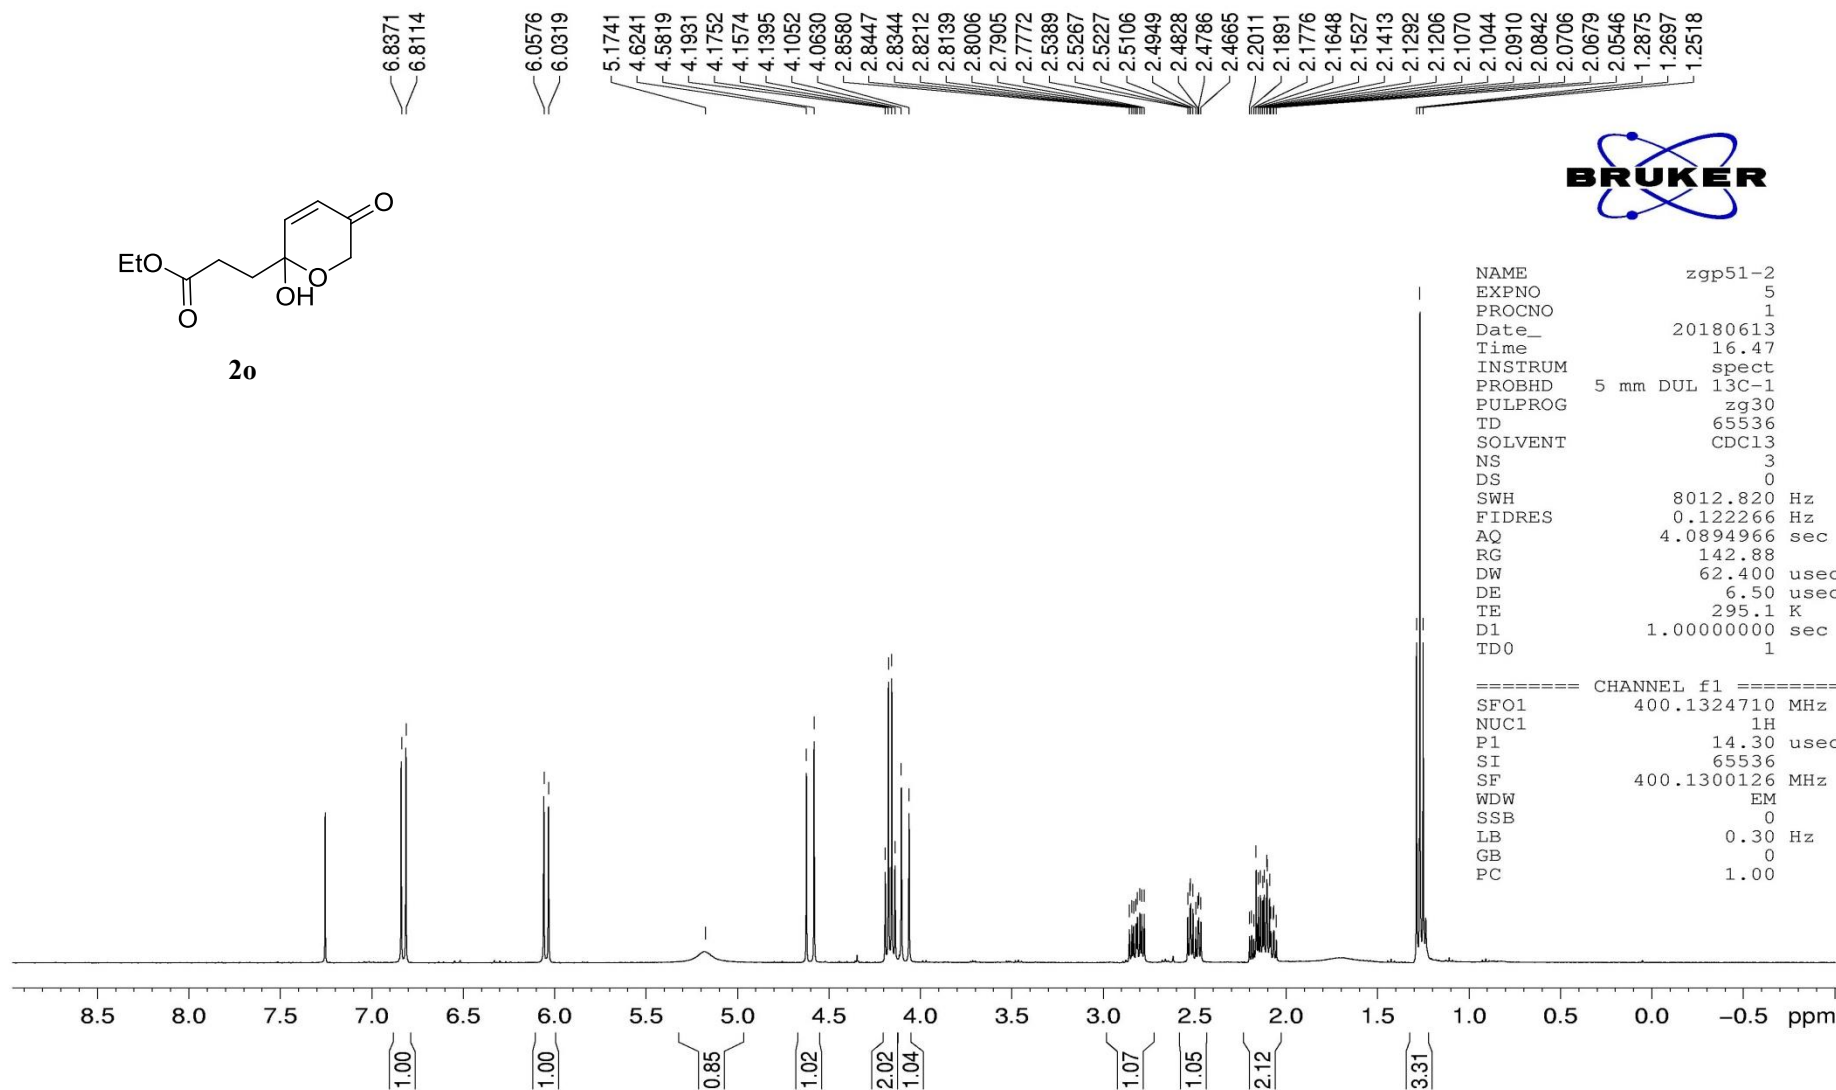

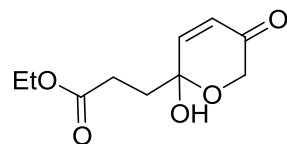

2o

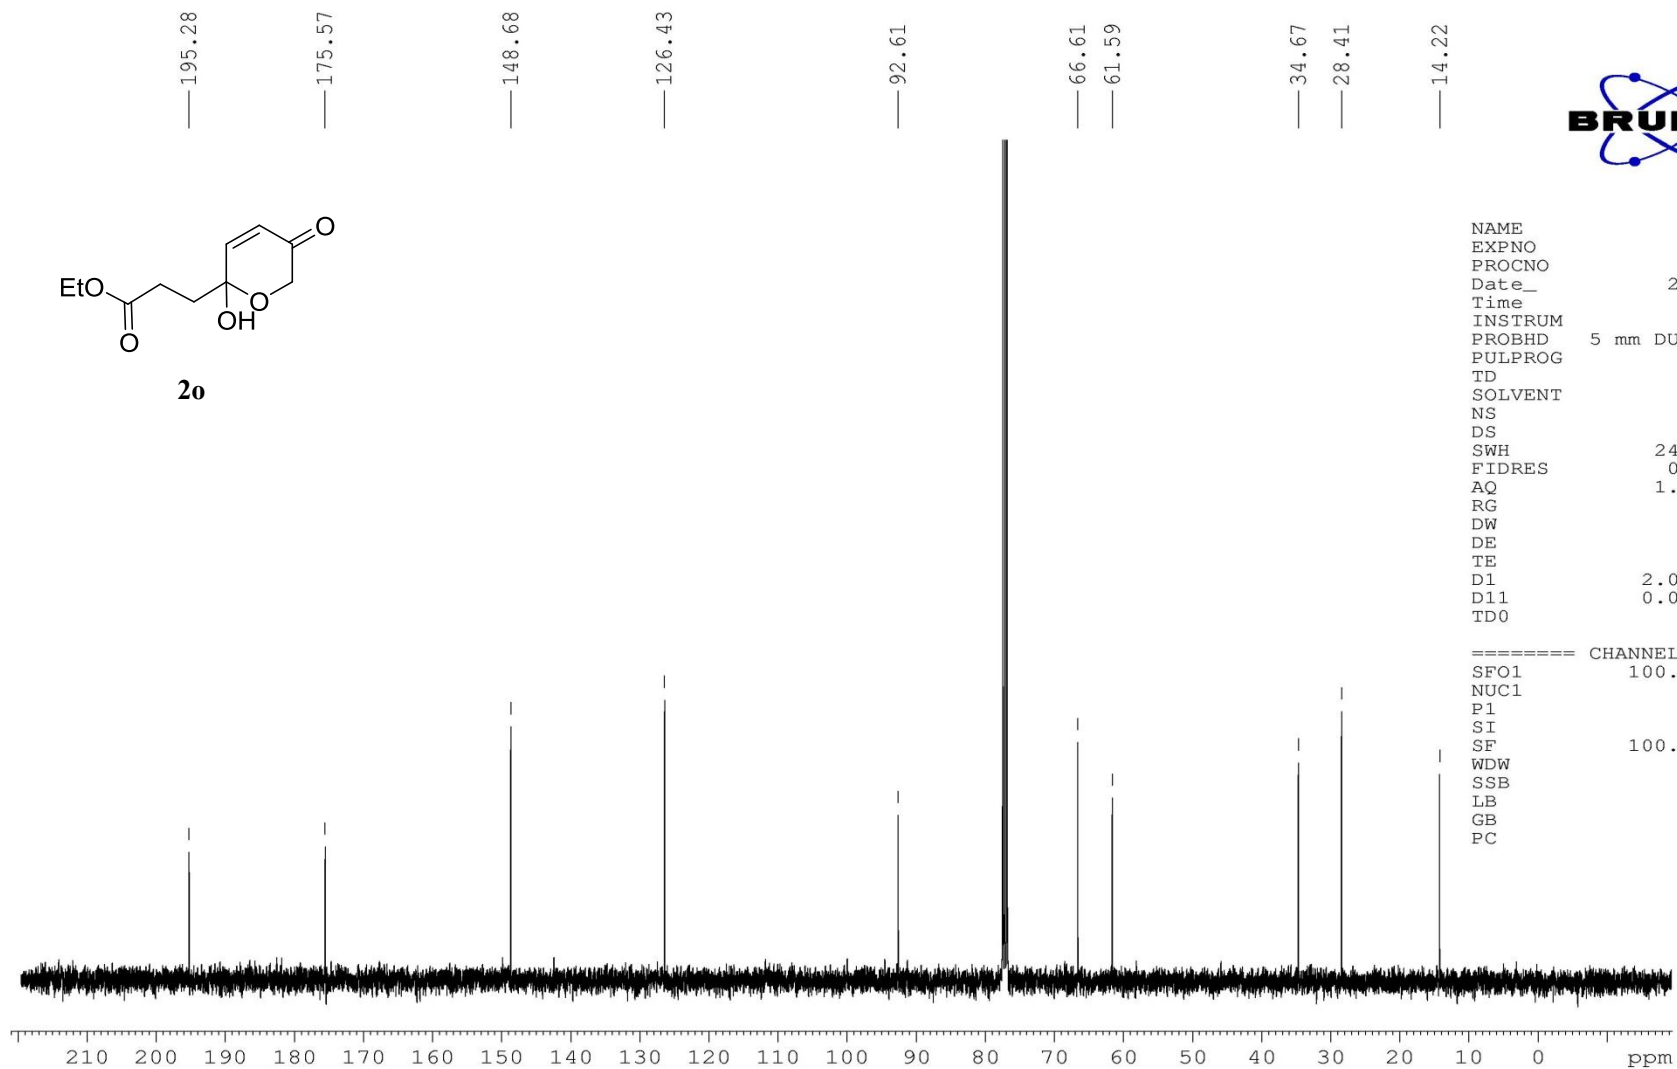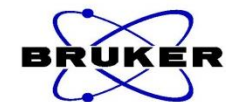

```

NAME                zgp51-2
EXPNO                6
PROCNO              1
Date_               20180613
Time                16.51
INSTRUM             spect
PROBHD              5 mm DUL 13C-1
PULPROG             zgpg30
TD                  65536
SOLVENT             CDCl3
NS                   196
DS                   0
SWH                 24038.461 Hz
FIDRES              0.366798 Hz
AQ                  1.3631988 sec
RG                   196.92
DW                  20.800 usec
DE                   6.50 usec
TE                  295.5 K
D1                   2.00000000 sec
D11                  0.03000000 sec
TD0                  1
  
```

```

===== CHANNEL f1 =====
SFO1                100.6228298 MHz
NUC1                 13C
P1                   9.60 usec
SI                   32768
SF                  100.6127579 MHz
WDW                  EM
SSB                   0
LB                   1.00 Hz
GB                   0
PC                   1.40
  
```



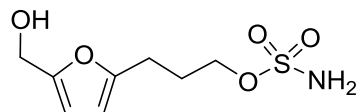

**1p**

7.4616

6.1655  
6.1580  
6.0624  
6.0550

5.1389  
5.1246  
5.1104

4.3357  
4.3215  
4.0824  
4.0666  
4.0507

2.6927  
2.6739  
2.6550

1.9649  
1.9459  
1.9280

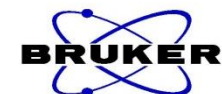

```

NAME                zgp109
EXPNO                1
PROCNO              1
Date_               20180712
Time                14.09
INSTRUM             spect
PROBHD              5 mm DUL 13C-1
PULPROG             zg30
TD                  65536
SOLVENT             DMSO
NS                   1
DS                   0
SWH                 8012.820 Hz
FIDRES              0.122266 Hz
AQ                  4.0894966 sec
RG                  112.31
DW                  62.400 usec
DE                   6.50 usec
TE                   298.0 K
D1                  1.00000000 sec
TD0                 1
  
```

```

===== CHANNEL f1 =====
SFO1                400.1324710 MHz
NUC1                 1H
P1                   14.30 usec
SI                   65536
SF                   400.1300000 MHz
WDW                  EM
SSB                   0
LB                   0.30 Hz
GB                   0
PC                   1.00
  
```

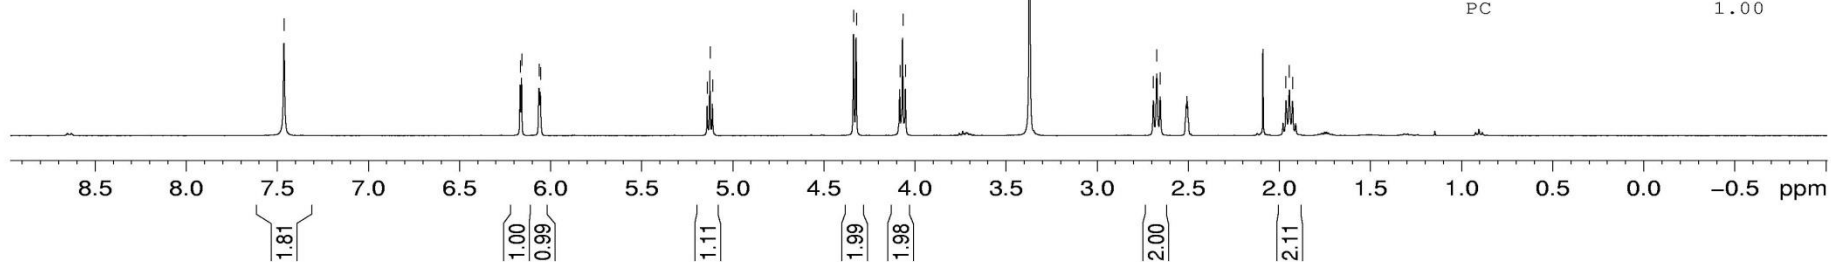

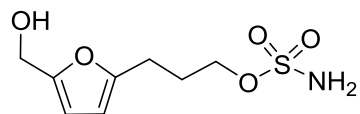

1p

154.39  
154.06

108.03  
106.42

68.63

56.09

27.51  
24.14

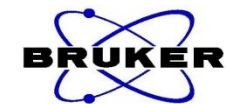

NAME zgp109  
EXPNO 2  
PROCNO 1  
Date\_ 20180712  
Time 14.12  
INSTRUM spect  
PROBHD 5 mm DUL 13C-1  
PULPROG zgpg30  
TD 65536  
SOLVENT DMSO  
NS 59  
DS 0  
SWH 24038.461 Hz  
FIDRES 0.366798 Hz  
AQ 1.3631988 sec  
RG 196.92  
DW 20.800 usec  
DE 6.50 usec  
TE 298.4 K  
D1 2.00000000 sec  
D11 0.03000000 sec  
TD0 1

===== CHANNEL f1 =====  
SF01 100.6228298 MHz  
NUC1 13C  
P1 9.60 usec  
SI 32768  
SF 100.6127690 MHz  
WDW EM  
SSB 0  
LB 1.00 Hz  
GB 0  
PC 1.40

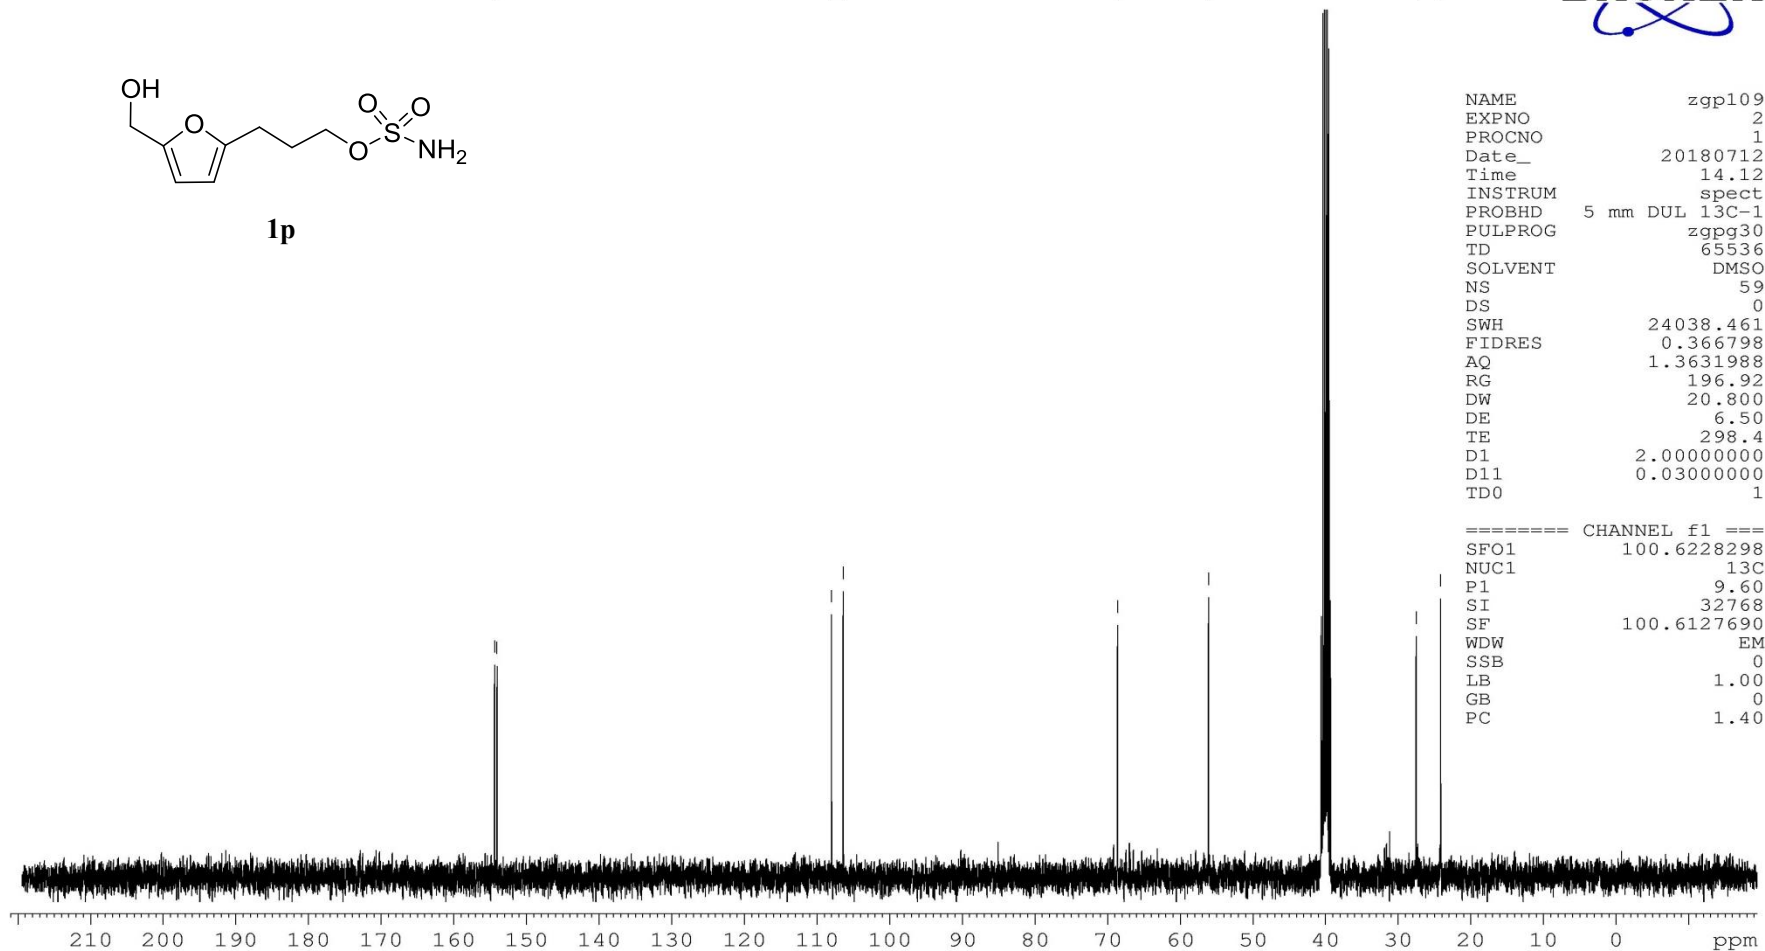

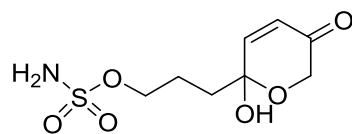

2p

7.4226

7.0633

7.0375

6.7398

6.0542

6.0284

4.4463

4.4039

4.0567

4.0451

4.0306

4.0141

1.8180

1.7984

1.7791

1.7715

1.7623

1.7443

1.7262

1.7085

1.6997

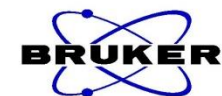

NAME zgpl14  
EXPNO 1  
PROCNO 1  
Date\_ 20180712  
Time 20.07  
INSTRUM spect  
PROBHD 5 mm DUL 13C-1  
PULPROG zg30  
TD 65536  
SOLVENT DMSO  
NS 4  
DS 0  
SWH 8012.820 Hz  
FIDRES 0.122266 Hz  
AQ 4.0894966 sec  
RG 126.97  
DW 62.400 usec  
DE 6.50 usec  
TE 297.4 K  
D1 1.00000000 sec  
TD0 1

===== CHANNEL f1 =====  
SFO1 400.1324710 MHz  
NUC1 1H  
P1 14.30 usec  
SI 65536  
SF 400.1300000 MHz  
WDW EM  
SSB 0  
LB 0.30 Hz  
GB 0  
PC 1.00

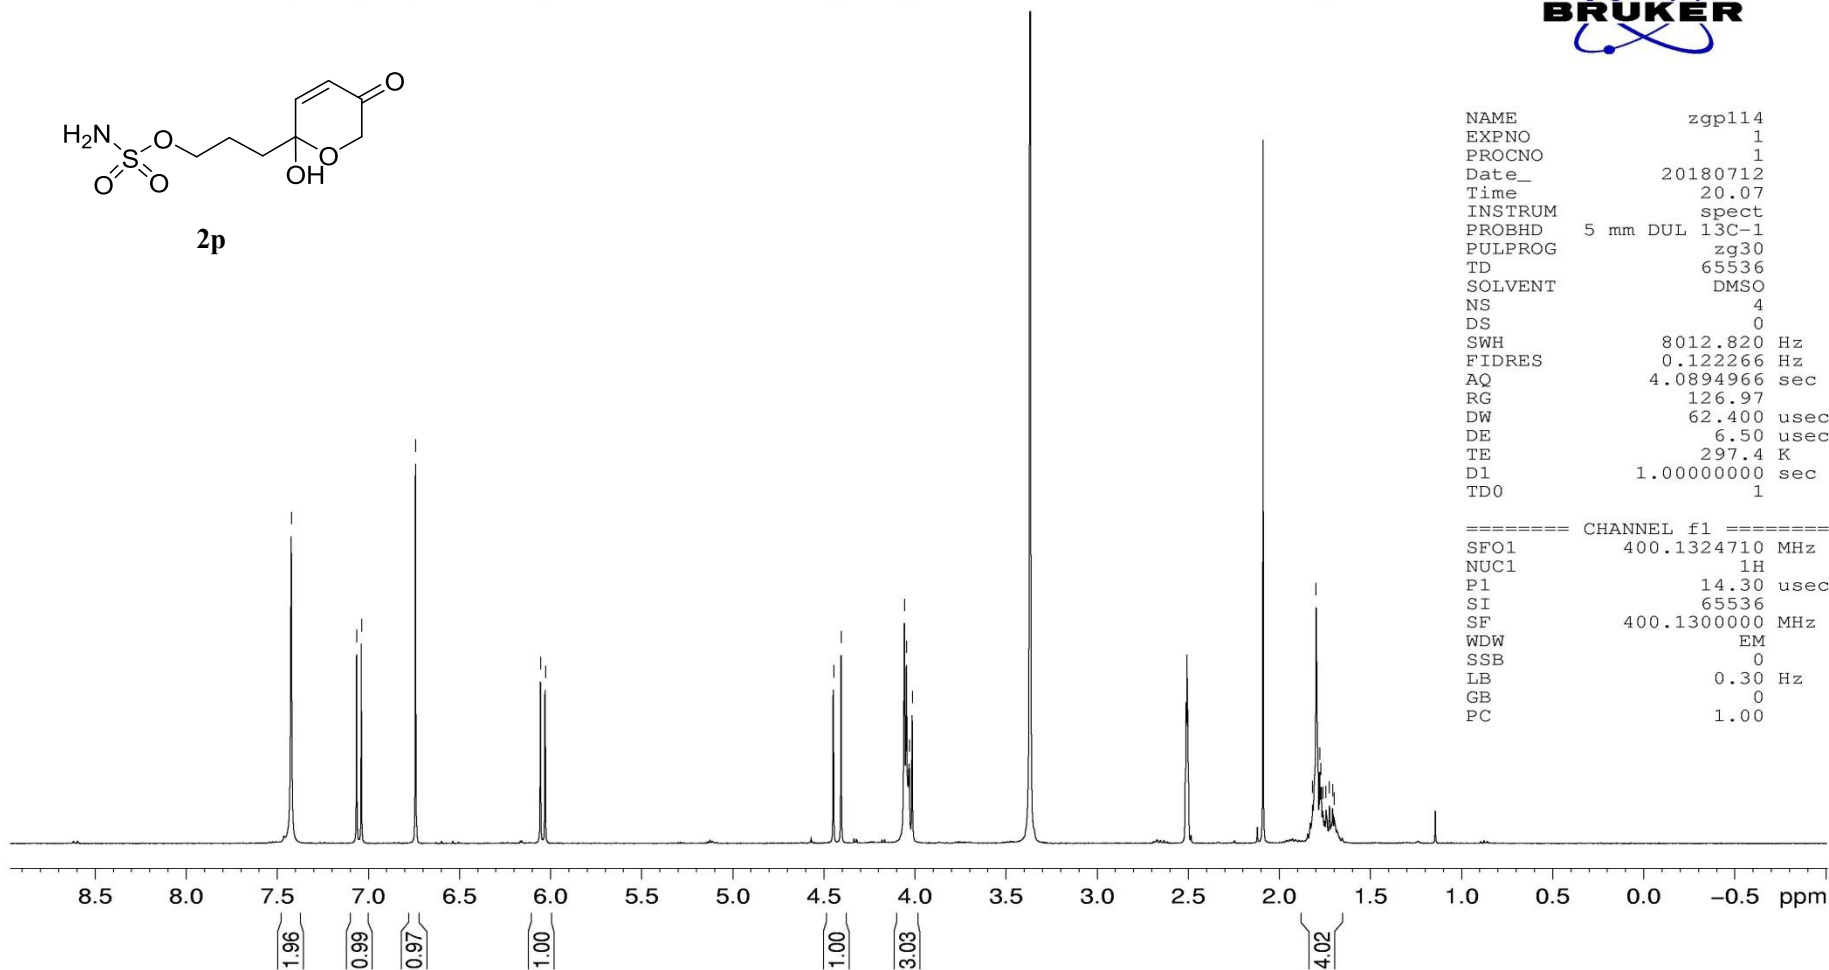

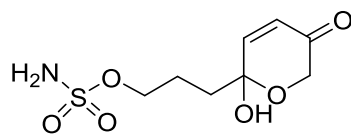

2p

—195.82

—151.06

—126.22

—93.60

—69.49

—66.25

—36.38

—23.46

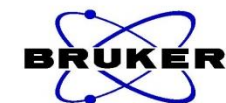

NAME zgp114  
EXPNO 2  
PROCNO 1  
Date\_ 20180712  
Time 20.10  
INSTRUM spect  
PROBHD 5 mm DUL 13C-1  
PULPROG zgpg30  
TD 65536  
SOLVENT DMSO  
NS 85  
DS 0  
SWH 24038.461 Hz  
FIDRES 0.366798 Hz  
AQ 1.3631988 sec  
RG 196.92  
DW 20.800 usec  
DE 6.50 usec  
TE 297.8 K  
D1 2.00000000 sec  
D11 0.03000000 sec  
TD0 1

===== CHANNEL f1 =====  
SF01 100.6228298 MHz  
NUC1 13C  
P1 9.60 usec  
SI 32768  
SF 100.6127690 MHz  
WDW EM  
SSB 0  
LB 1.00 Hz  
GB 0  
PC 1.40

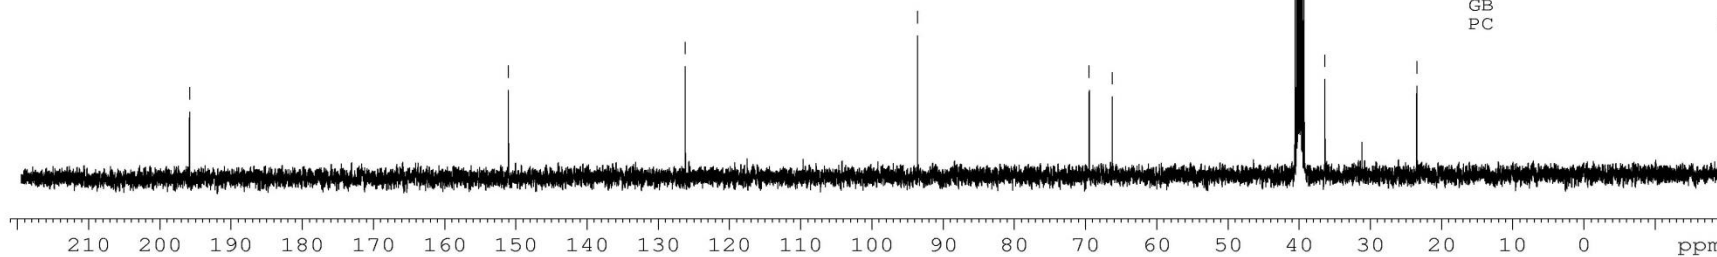

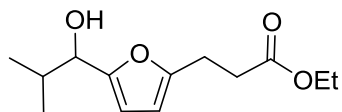

**1q**

7.2602

6.0987  
6.0910  
5.9498  
5.9423

4.2965  
4.2786  
4.1593  
4.1414  
4.1236  
4.1058

2.9551  
2.9366  
2.9172  
2.6443  
2.6245  
2.6063  
2.1115  
2.0945  
2.0776  
2.0606  
2.0435  
2.0265  
1.2595  
1.2416  
1.2238  
1.0137  
0.9969  
0.8488  
0.8319

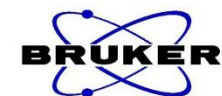

```

NAME                zgp80
EXPNO                1
PROCNO              1
Date_               20180621
Time                17.13
INSTRUM             spect
PROBHD              5 mm PABBO BB-
PULPROG             zg30
TD                 65536
SOLVENT             CDC13
NS                   1
DS                   0
SWH                 8223.685 Hz
FIDRES              0.125483 Hz
AQ                 3.9846387 sec
RG                   287
DW                 60.800 usec
DE                   6.00 usec
TE                  295.8 K
D1                  1.00000000 sec
TD0                  1
  
```

```

===== CHANNEL f1 =====
NUC1                 1H
P1                   15.80 usec
PL1                  -1.00 dB
SFO1                400.1324710 MHz
SI                   32768
SF                  400.1300093 MHz
WDW                  EM
SSB                   0
LB                   0.30 Hz
GB                   0
PC                   1.00
  
```

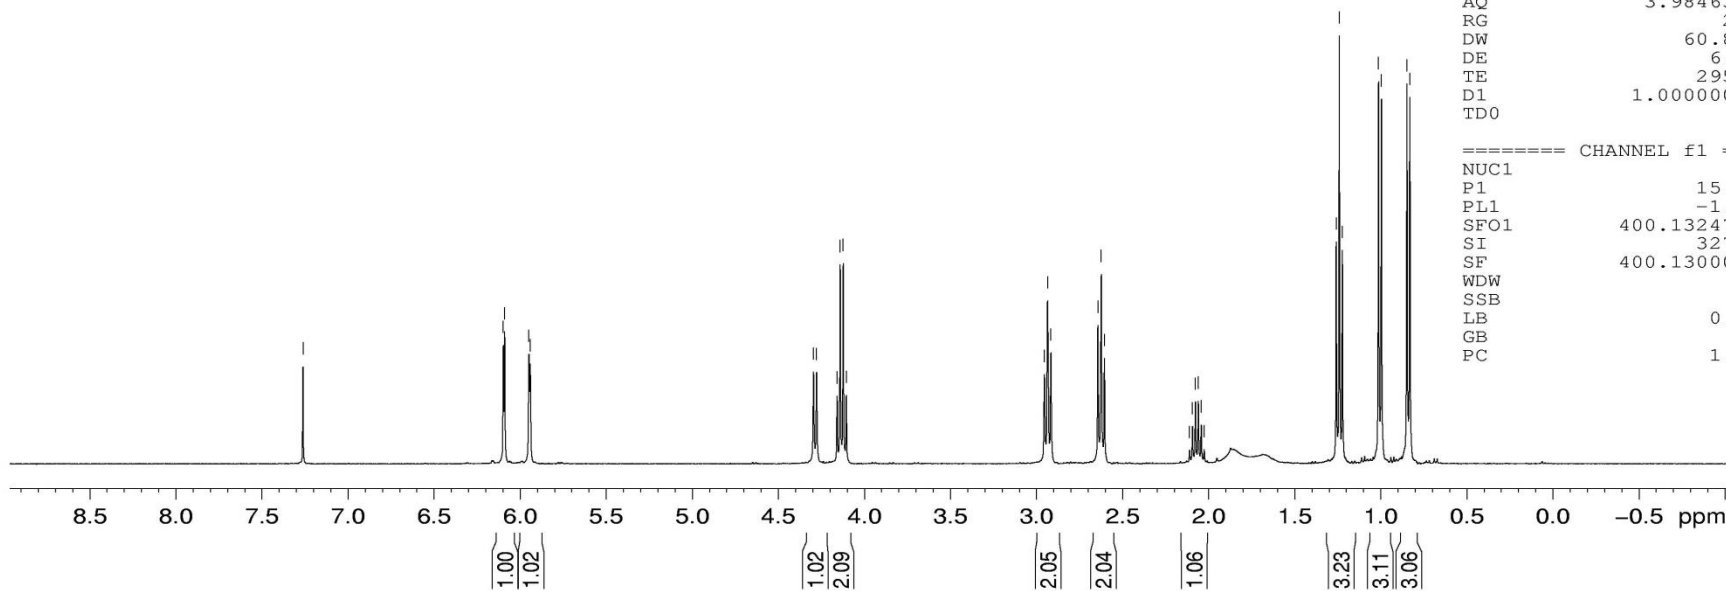

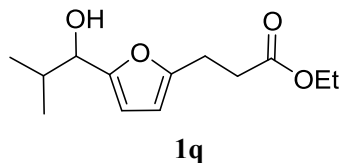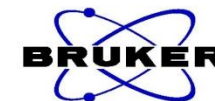

```

NAME                zgp80
EXPNO                2
PROCNO              1
Date_               20180621
Time                17.28
INSTRUM             spect
PROBHD              5 mm PABBO BB-
PULPROG             zgpg30
TD                  65536
SOLVENT             CDCl3
NS                   710
DS                   0
SWH                 24038.461 Hz
FIDRES              0.366798 Hz
AQ                  1.3631988 sec
RG                   2050
DW                  20.800 usec
DE                   6.00 usec
TE                  296.7 K
D1                   2.00000000 sec
d11                  0.03000000 sec
DELTA               1.89999998 sec
TD0                  1
  
```

```

===== CHANNEL f1 =====
NUC1                 13C
P1                    8.60 usec
PL1                   -3.00 dB
SFO1                 100.6228298 MHz
  
```

```

===== CHANNEL f2 =====
CPDPRG2             waltz16
NUC2                  1H
PCPD2                80.00 usec
PL12                  14.39 dB
PL13                  18.00 dB
PL2                   -1.00 dB
SFO2                 400.1316005 MHz
SI                    32768
SF                   100.6127575 MHz
WDW                   EM
SSB                   0
LB                    1.00 Hz
GB                    0
PC                    1.40
  
```

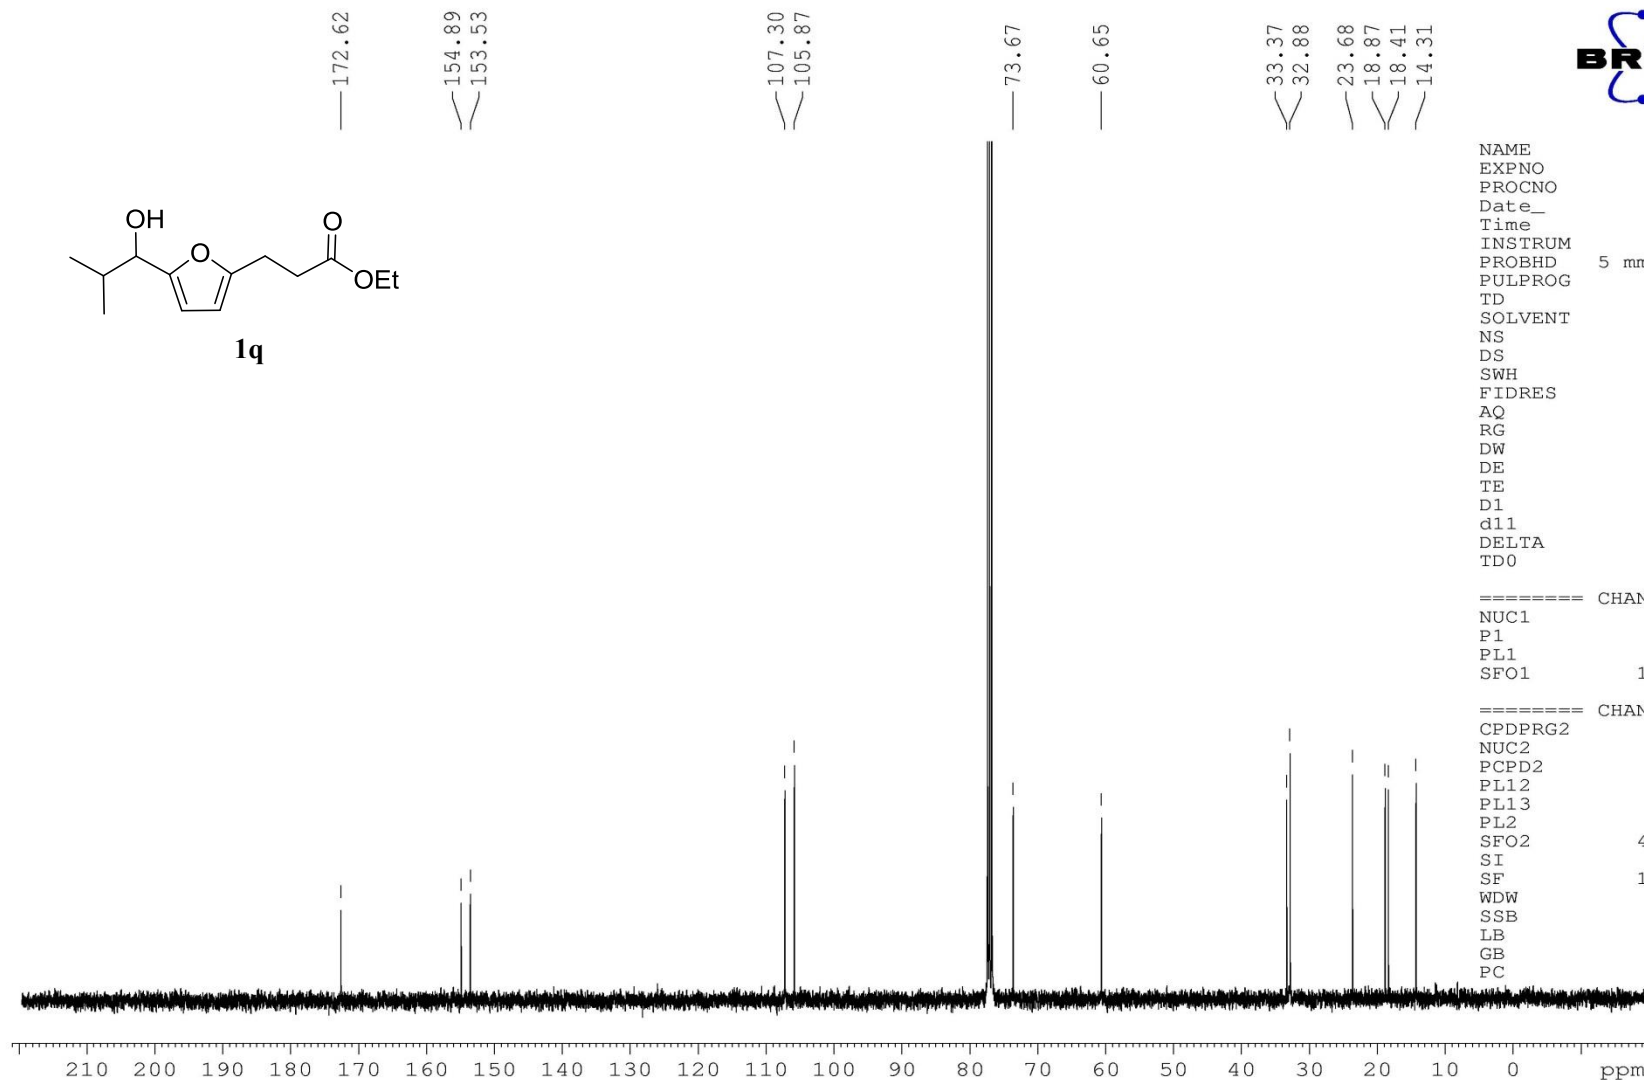

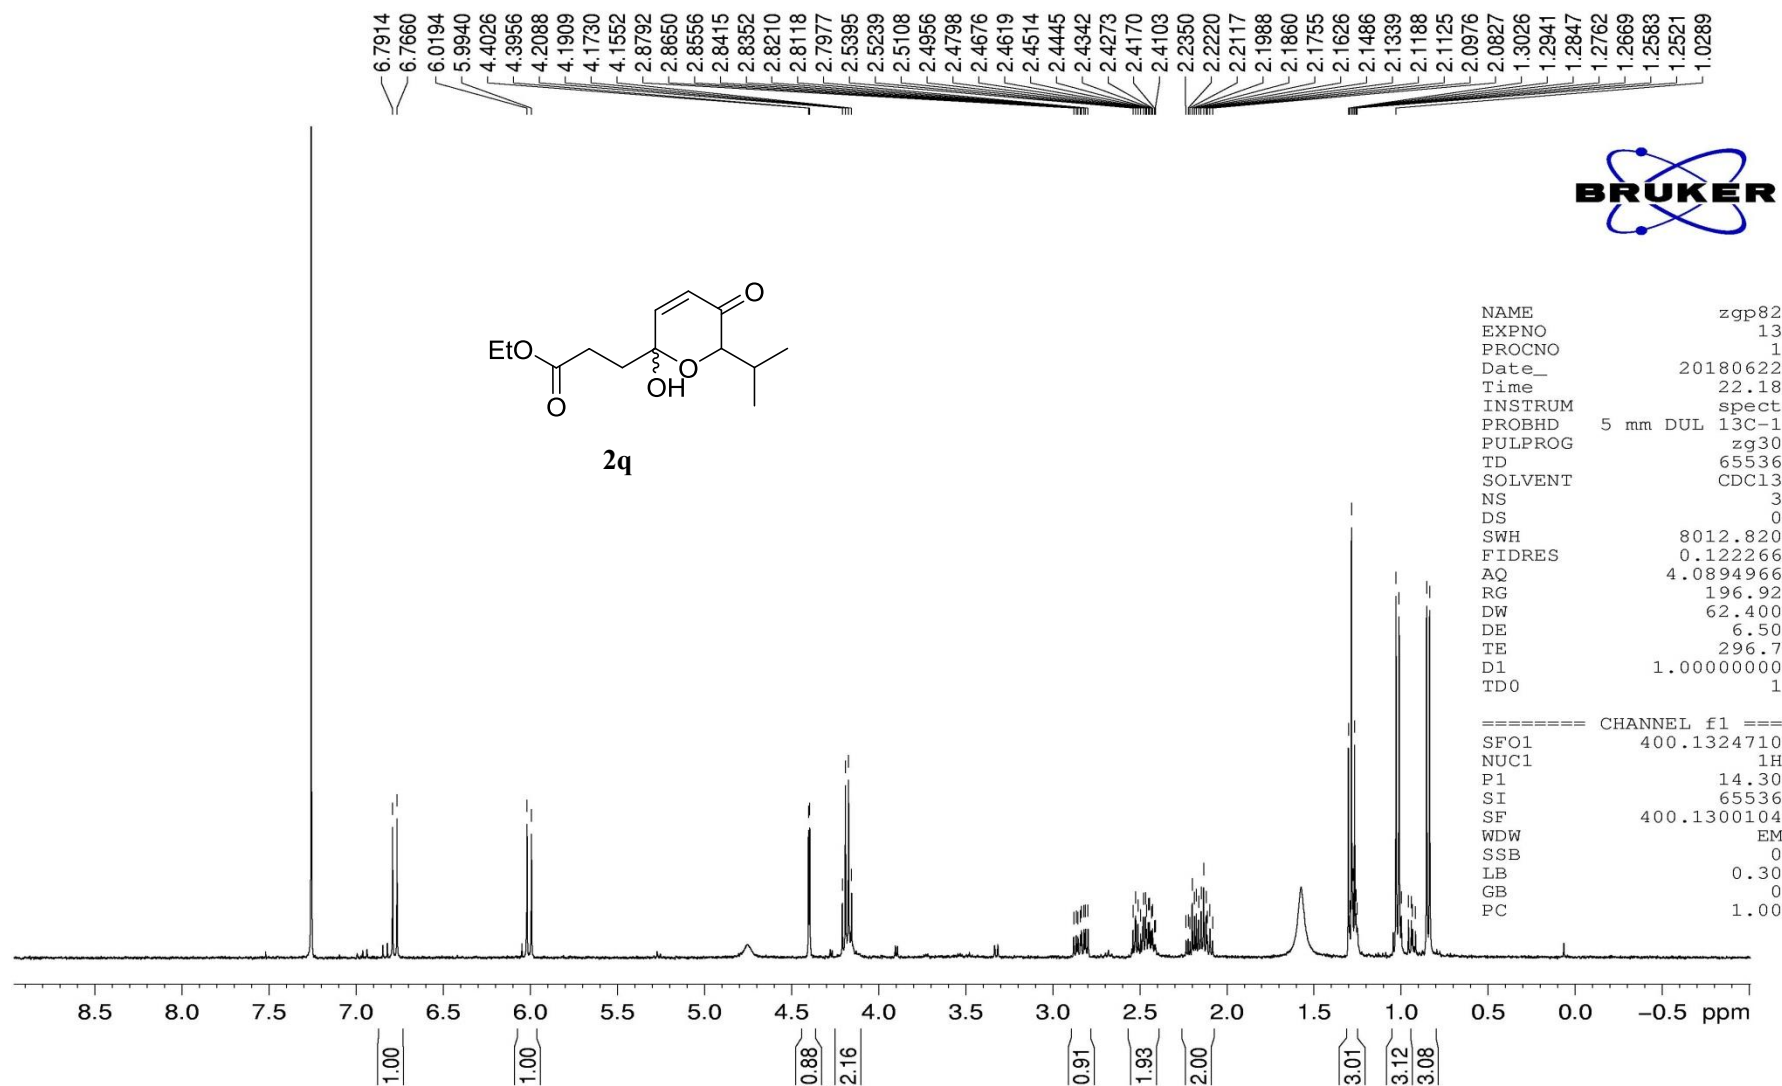

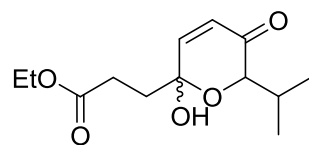

2q

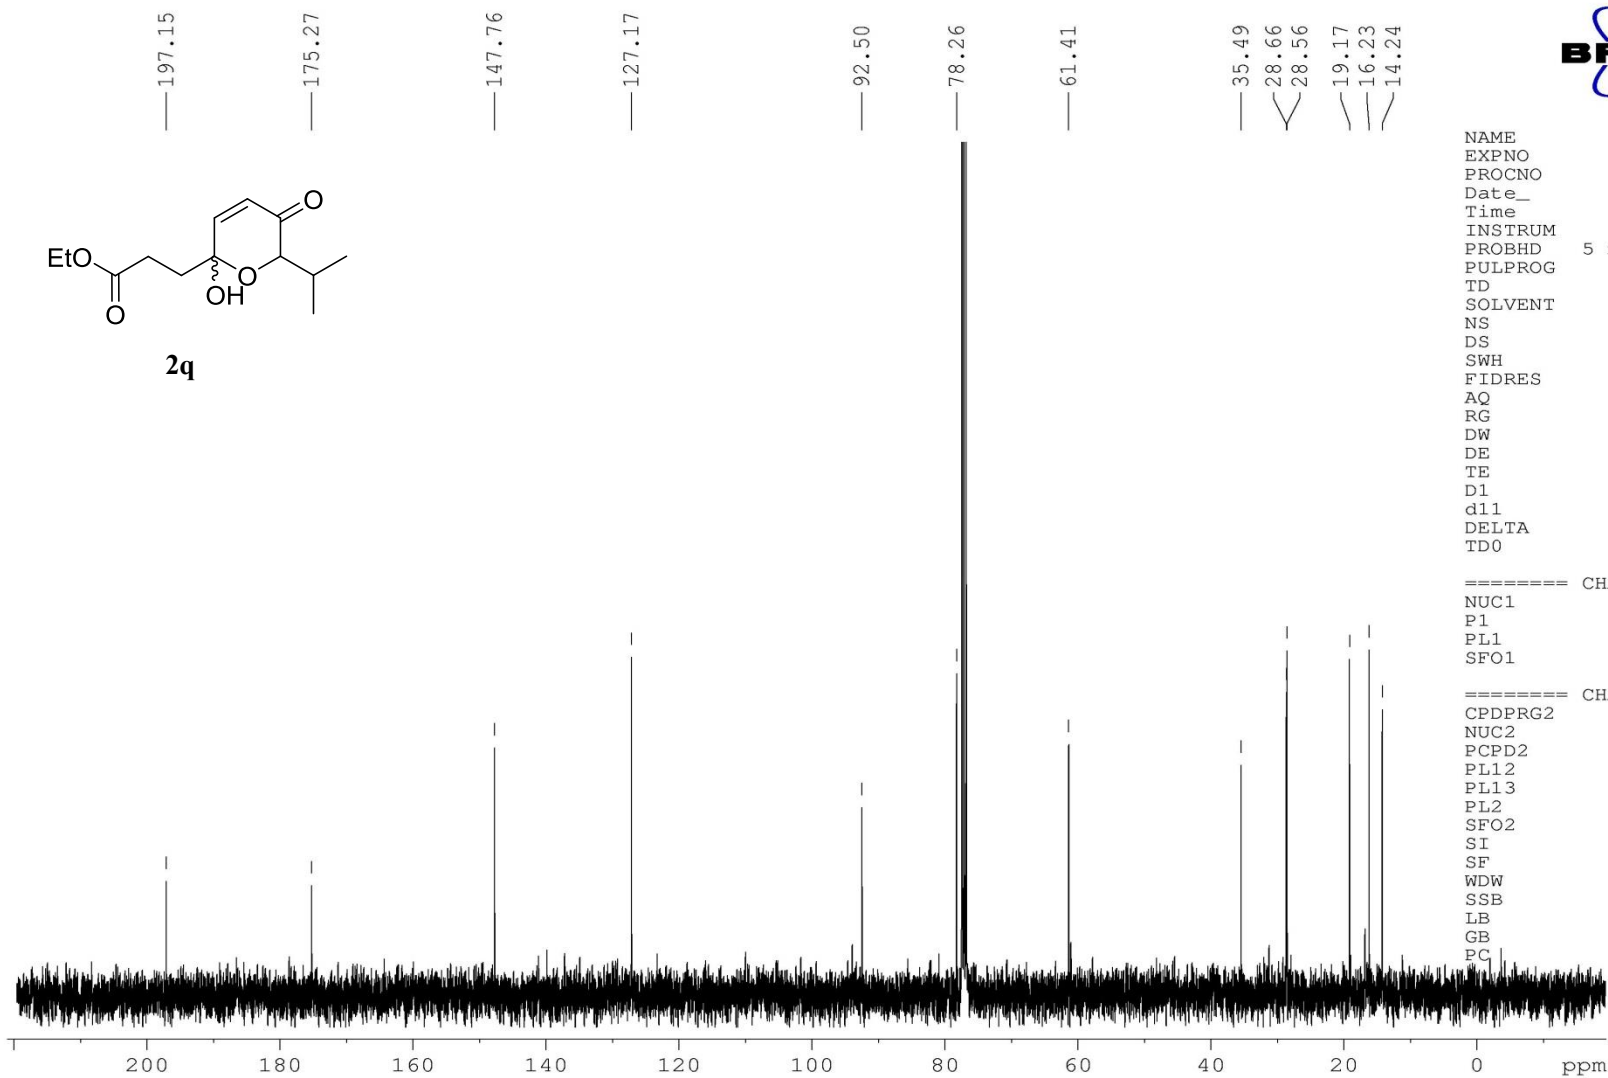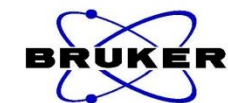

```

NAME                zgp81
EXPNO                6
PROCNO              1
Date_               20180621
Time                21.39
INSTRUM             spect
PROBHD              5 mm PABBO BB-
PULPROG             zgpg30
TD                  65536
SOLVENT             CDC13
NS                   95
DS                   0
SWH                 24038.461 Hz
FIDRES              0.366798 Hz
AQ                  1.3631988 sec
RG                   2050
DW                  20.800 usec
DE                   6.00 usec
TE                  296.6 K
D1                  2.00000000 sec
d11                  0.03000000 sec
DELTA               1.89999998 sec
TD0                  1
  
```

```

===== CHANNEL f1 =====
NUC1                 13C
P1                    8.60 usec
PL1                   -3.00 dB
SFO1                 100.6228298 MHz
  
```

```

===== CHANNEL f2 =====
CPDPRG2             waltz16
NUC2                  1H
PCPD2                80.00 usec
PL12                  14.39 dB
PL13                  18.00 dB
PL2                   -1.00 dB
SFO2                 400.1316005 MHz
SI                    32768
SF                   100.6127568 MHz
WDW                   EM
SSB                    0
LB                     1.00 Hz
GB                      0
PC                     1.40
  
```



7.5870  
7.2842  
7.2041  
7.1954  
6.5160  
6.5126  
6.5082  
6.5041  
6.4475  
6.4396  
6.2338  
6.2259

5.2648

4.4014  
4.3843

2.1455  
2.1285  
2.1117  
2.0948

1.0316  
1.0148  
0.8981  
0.8812

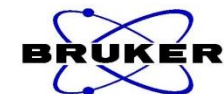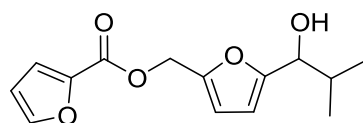

1r

NAME zgpl22  
EXPNO 1  
PROCNO 1  
Date\_ 20180717  
Time 13.44  
INSTRUM spect  
PROBHD 5 mm DUL 13C-1  
PULPROG zg30  
TD 65536  
SOLVENT CDCl3  
NS 8  
DS 0  
SWH 8012.820 Hz  
FIDRES 0.122266 Hz  
AQ 4.0894966 sec  
RG 103.52  
DW 62.400 usec  
DE 6.50 usec  
TE 297.0 K  
D1 1.00000000 sec  
TD0 1

===== CHANNEL f1 =====  
SFO1 400.1324710 MHz  
NUC1 1H  
P1 14.30 usec  
SI 65536  
SF 400.1300000 MHz  
WDW EM  
SSB 0  
LB 0.30 Hz  
GB 0  
PC 1.00

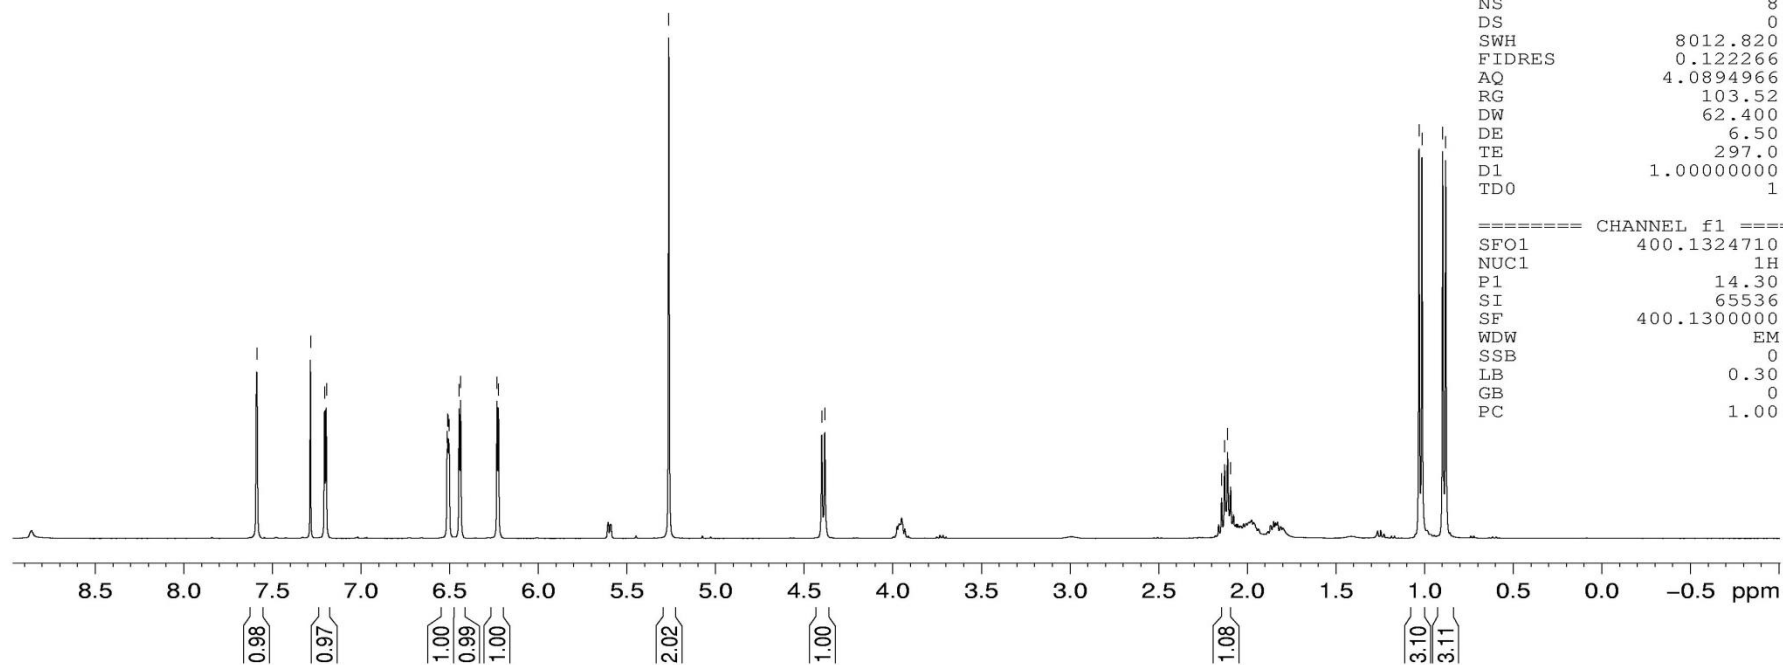

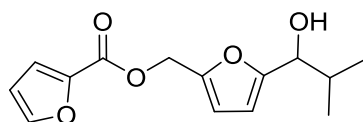

**1r**

158.33  
157.29  
148.16  
146.53  
144.30

118.40  
111.88  
111.86  
107.47

73.46

58.41

33.26

18.72  
18.04

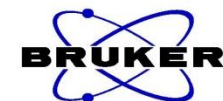

NAME zgp122  
EXPNO 2  
PROCNO 1  
Date\_ 20180717  
Time 13.47  
INSTRUM spect  
PROBHD 5 mm DUL 13C-1  
PULPROG zgpg30  
TD 65536  
SOLVENT CDCl3  
NS 77  
DS 0  
SWH 24038.461 Hz  
FIDRES 0.366798 Hz  
AQ 1.3631988 sec  
RG 196.92  
DW 20.800 usec  
DE 6.50 usec  
TE 297.5 K  
D1 2.00000000 sec  
D11 0.03000000 sec  
TD0 1

===== CHANNEL f1 =====  
SFO1 100.6228298 MHz  
NUC1 13C  
P1 9.60 usec  
SI 32768  
SF 100.6127690 MHz  
WDW EM  
SSB 0  
LB 1.00 Hz  
GB 0  
PC 1.40

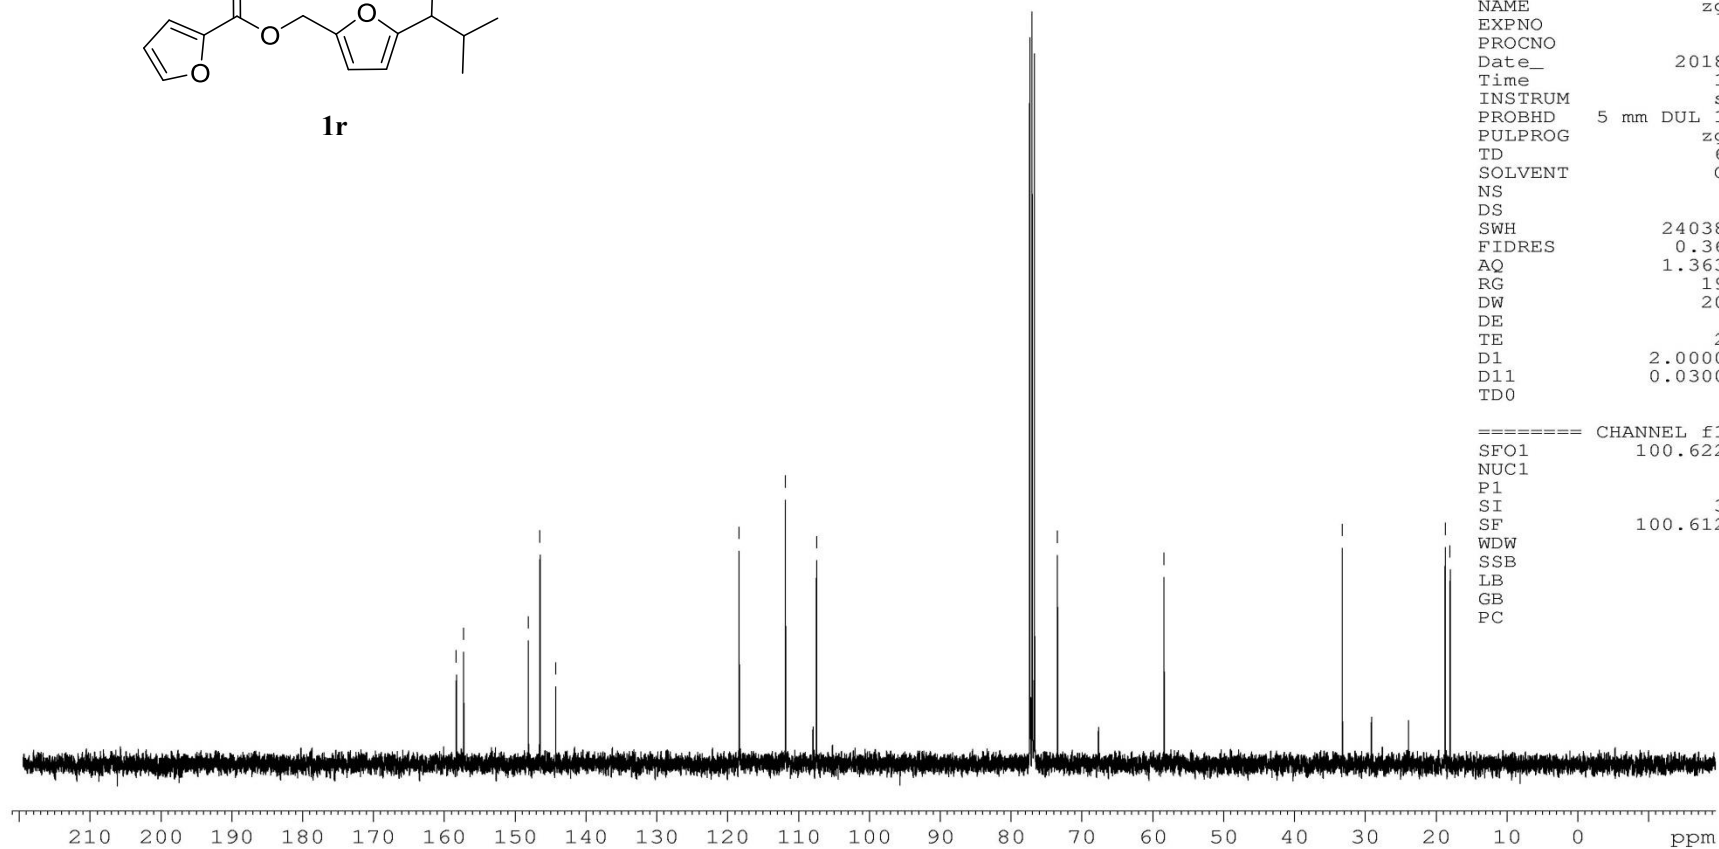

7.6397  
7.2842  
7.2664  
7.2578  
7.2360  
7.2272  
6.9874  
6.9618  
6.9088  
6.8828  
6.5636  
6.5590  
6.5550  
6.2197  
6.1938  
6.1739  
6.1483

4.7812  
4.7518  
4.7068  
4.6778  
4.4433  
4.4369  
4.3315  
4.3024  
4.2730  
4.2002  
4.1884

2.4876  
2.4818  
2.4703  
2.4645  
2.4534  
2.4473  
2.4295

1.0450  
1.0275  
0.9910  
0.9709  
0.9530  
0.8583  
0.8413

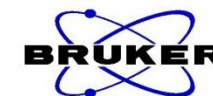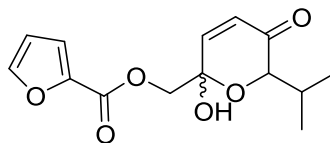

2r

NAME zgp125  
EXPNO 1  
PROCNO 1  
Date\_ 20180717  
Time 17.06  
INSTRUM spect  
PROBHD 5 mm DUL 13C-1  
PULPROG zg30  
TD 65536  
SOLVENT CDCl3  
NS 3  
DS 0  
SWH 8012.820 Hz  
FIDRES 0.122266 Hz  
AQ 4.0894966 sec  
RG 112.31  
DW 62.400 usec  
DE 6.50 usec  
TE 296.4 K  
D1 1.00000000 sec  
TD0 1

===== CHANNEL f1 =====  
SFO1 400.1324710 MHz  
NUC1 1H  
P1 14.30 usec  
SI 65536  
SF 400.1300000 MHz  
WDW EM  
SSB 0  
LB 0.30 Hz  
GB 0  
PC 1.00

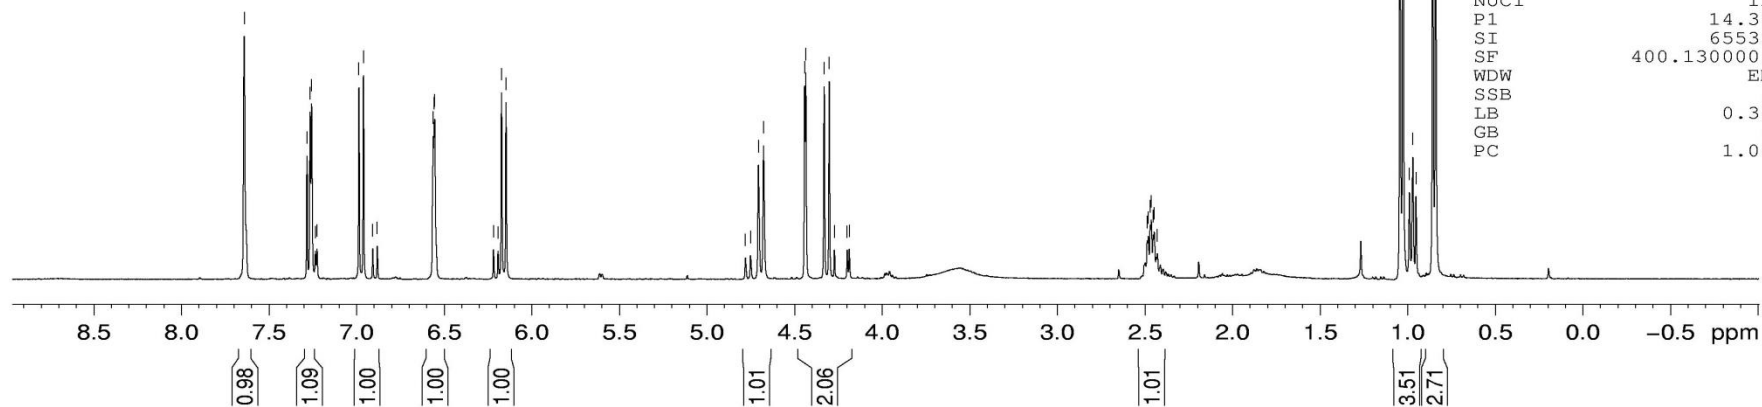

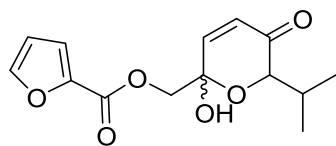

2r

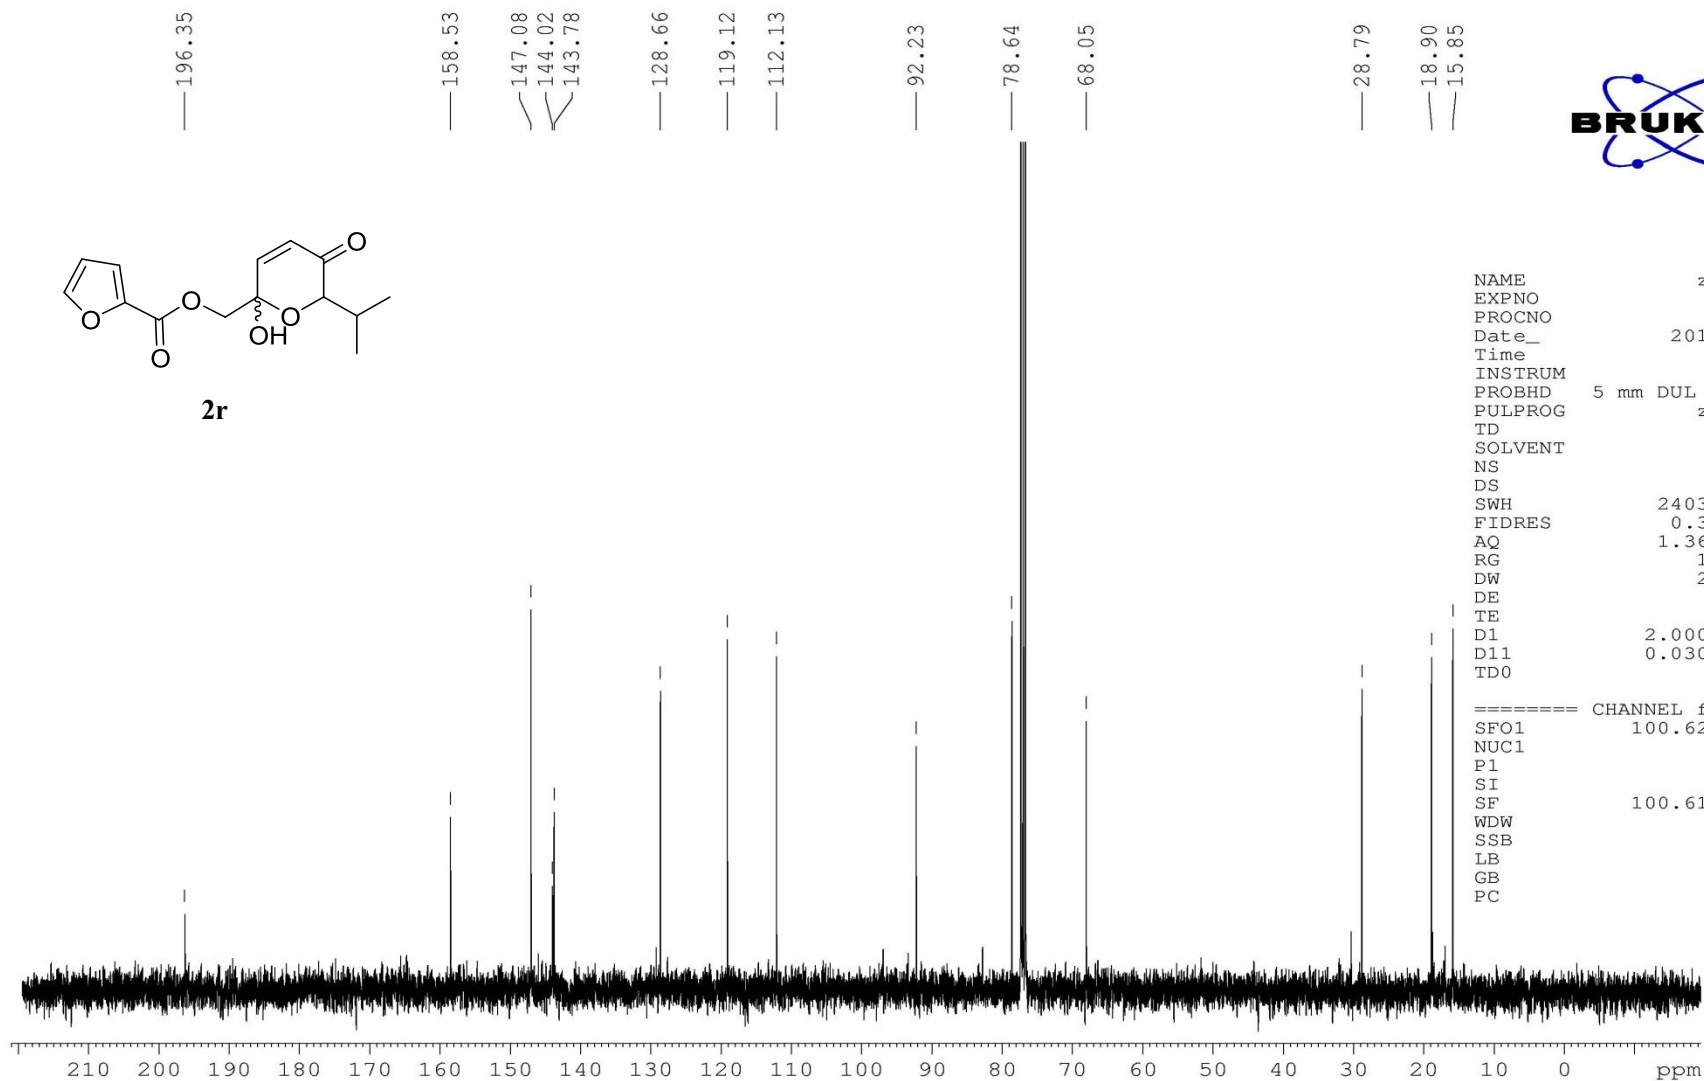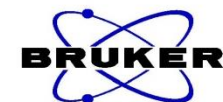

```

NAME                zgp125
EXPNO                2
PROCNO               1
Date_                20180717
Time                 17.08
INSTRUM              spect
PROBHD               5 mm DUL 13C-1
PULPROG              zgpg30
TD                   65536
SOLVENT              CDCl3
NS                   142
DS                   0
SWH                  24038.461 Hz
FIDRES               0.366798 Hz
AQ                   1.3631988 sec
RG                   196.92
DW                   20.800 usec
DE                   6.50 usec
TE                   296.8 K
D1                   2.00000000 sec
D11                  0.03000000 sec
TD0                  1

===== CHANNEL f1 =====
SFO1                 100.6228298 MHz
NUC1                  13C
P1                    9.60 usec
SI                   32768
SF                   100.6127690 MHz
WDW                   EM
SSB                   0
LB                   1.00 Hz
GB                   0
PC                   1.40

```

7.8228  
7.8136  
7.5775  
7.5651  
7.2842  
7.1135  
7.1021  
7.0919

6.4440  
6.4361  
6.2390  
6.2312

5.2587

4.4073  
4.3901

2.1540  
2.1371  
2.1202  
2.1032

1.0396  
1.0228  
0.9028  
0.8858

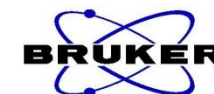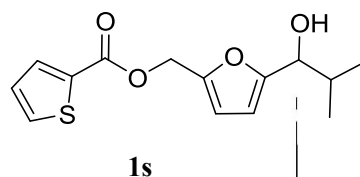

NAME zgp123  
EXPNO 1  
PROCNO 1  
Date\_ 20180718  
Time 12.57  
INSTRUM spect  
PROBHD 5 mm DUL 13C-1  
PULPROG zg30  
TD 65536  
SOLVENT CDCl3  
NS 15  
DS 0  
SWH 8012.820 Hz  
FIDRES 0.122266 Hz  
AQ 4.0894966 sec  
RG 82.92  
DW 62.400 usec  
DE 6.50 usec  
TE 296.6 K  
D1 1.00000000 sec  
TD0 1

===== CHANNEL f1 =====  
SFO1 400.1324710 MHz  
NUC1 1H  
P1 14.30 usec  
SI 65536  
SF 400.1300000 MHz  
WDW EM  
SSB 0  
LB 0.30 Hz  
GB 0  
PC 1.00

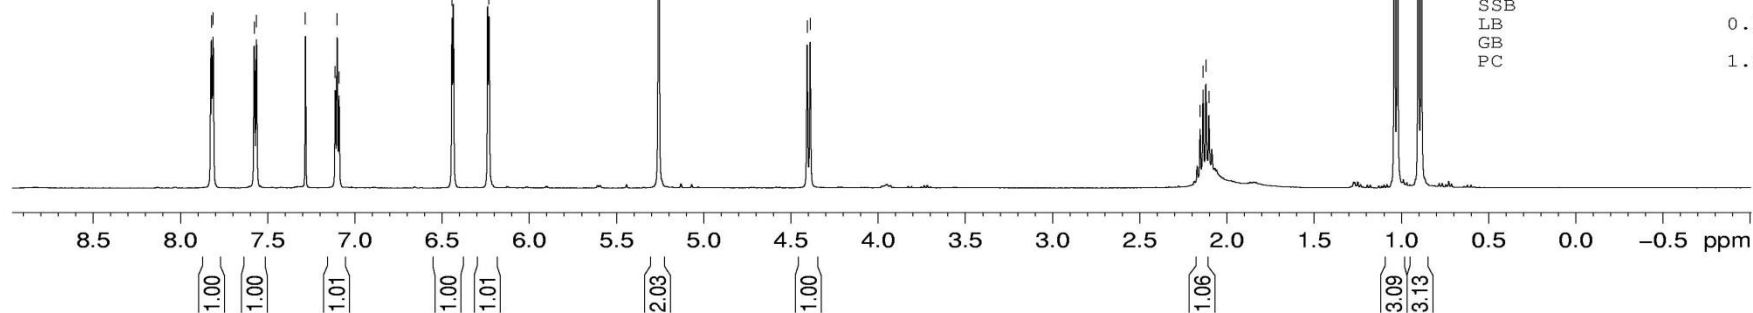

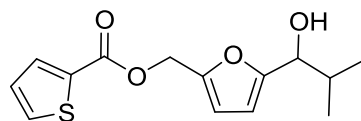

**1s**

—161.91  
—157.20  
—148.37  
133.78  
133.39  
132.71  
127.76  
—111.63  
—107.46  
—73.47  
—58.70  
—33.31  
18.71  
18.09

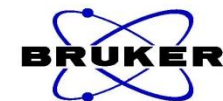

NAME zgp123  
EXPNO 2  
PROCNO 1  
Date\_ 20180718  
Time 13.04  
INSTRUM spect  
PROBHD 5 mm DUL 13C-1  
PULPROG zgpg30  
TD 65536  
SOLVENT CDCl3  
NS 111  
DS 0  
SWH 24038.461 Hz  
FIDRES 0.366798 Hz  
AQ 1.3631988 sec  
RG 196.92  
DW 20.800 usec  
DE 6.50 usec  
TE 297.1 K  
D1 2.00000000 sec  
D11 0.03000000 sec  
TD0 1

===== CHANNEL f1 =====  
SFO1 100.6228298 MHz  
NUC1 13C  
P1 9.60 usec  
SI 32768  
SF 100.6127690 MHz  
WDW EM  
SSB 0  
LB 1.00 Hz  
GB 0  
PC 1.40

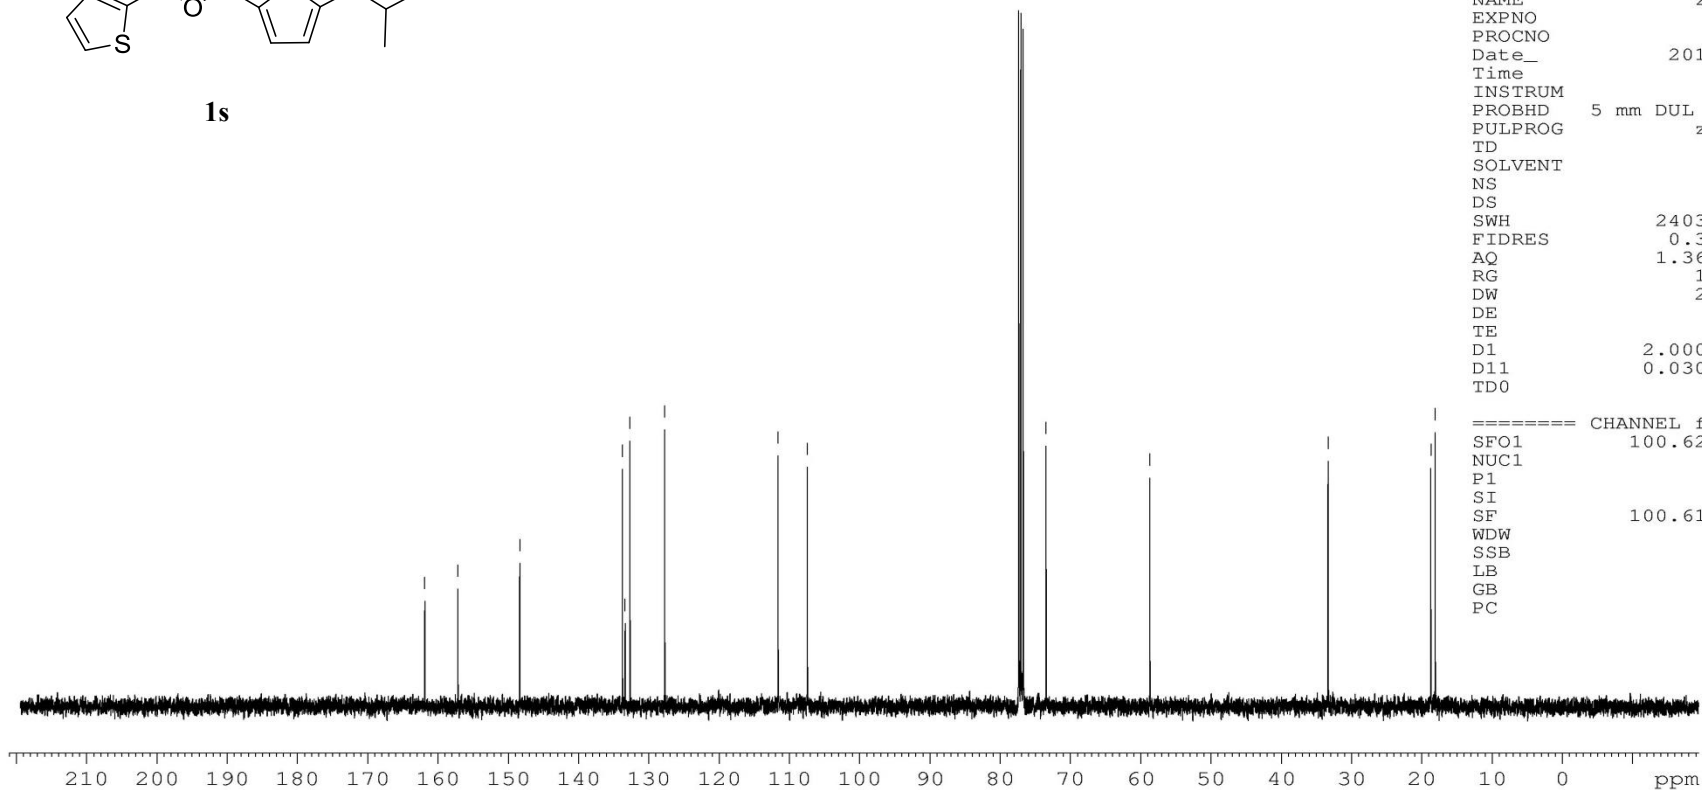

7.8809  
7.8717  
7.8485  
7.8394  
7.6450  
7.6330  
7.2847  
7.1657  
7.1549  
7.1448  
6.9871  
6.9615  
6.9162  
6.8903  
6.2311  
6.2051  
6.1856  
6.1600

4.7718  
4.7426  
4.7024  
4.6734  
4.4517  
4.4456  
4.3353  
4.3200  
4.3063  
4.2908  
4.2206  
4.2092

2.5176  
2.5115  
2.5001  
2.4946  
2.4831  
2.4773  
2.4661  
2.4602  
2.4435  
2.4273

1.0571  
1.0396  
1.0062  
0.9888  
0.9768  
0.9600  
0.8711  
0.8541

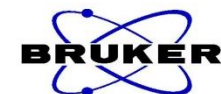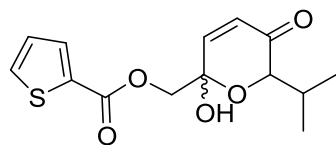

2s

NAME zgp127  
EXPNO 1  
PROCNO 1  
Date\_ 20180718  
Time 16.25  
INSTRUM spect  
PROBHD 5 mm DUL 13C-1  
PULPROG zg30  
TD 65536  
SOLVENT CDCl3  
NS 3  
DS 0  
SWH 8012.820 Hz  
FIDRES 0.122266 Hz  
AQ 4.0894966 sec  
RG 142.88  
DW 62.400 usec  
DE 6.50 usec  
TE 295.8 K  
D1 1.00000000 sec  
TD0 1

===== CHANNEL f1 =====  
SFO1 400.1324710 MHz  
NUC1 1H  
P1 14.30 usec  
SI 65536  
SF 400.1300000 MHz  
WDW EM  
SSB 0  
LB 0.30 Hz  
GB 0  
PC 1.00

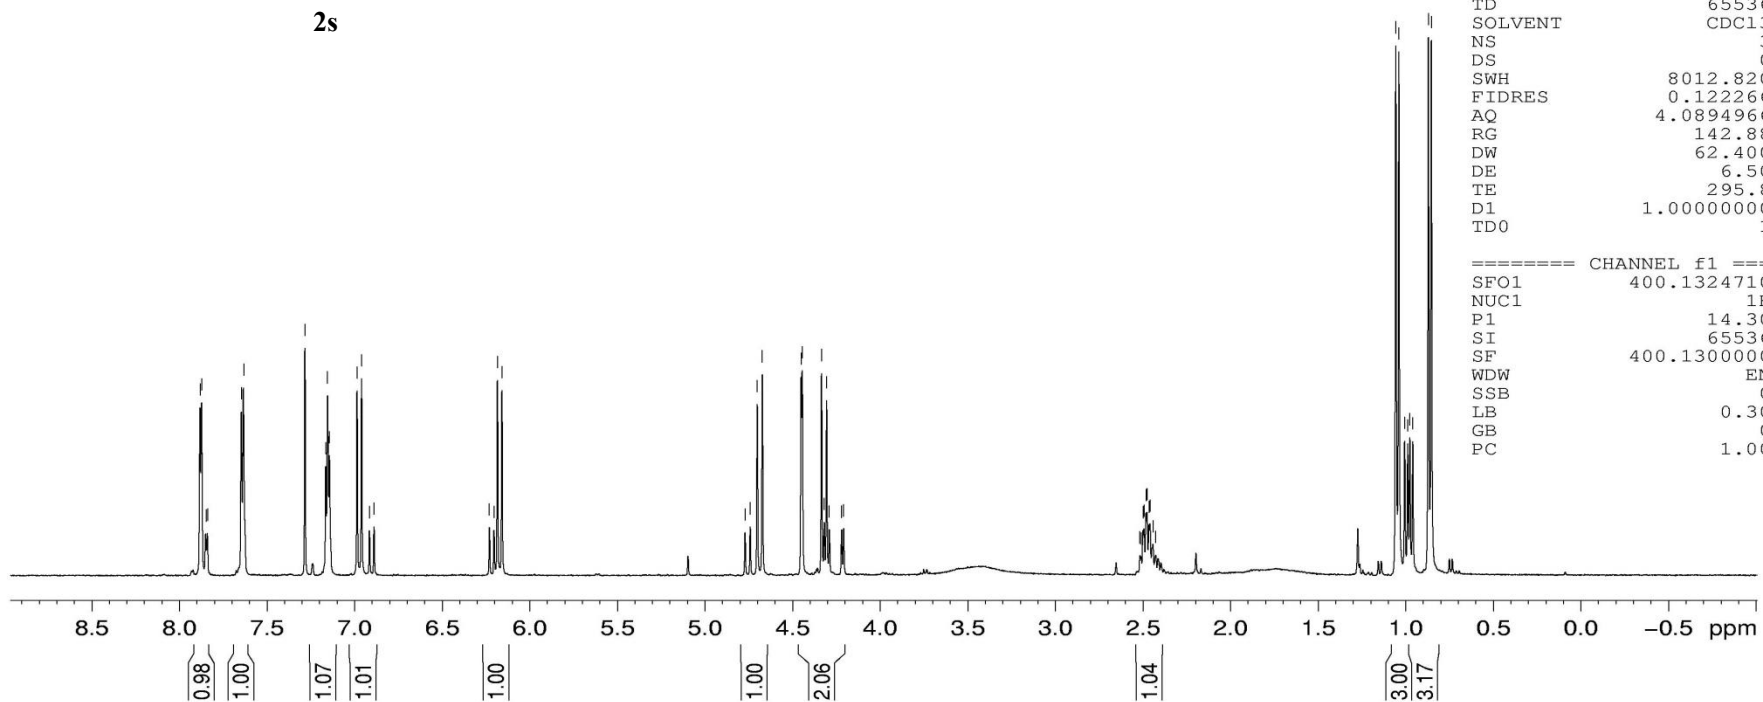

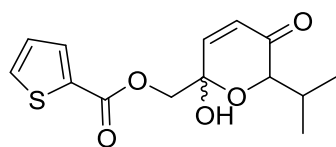

2s

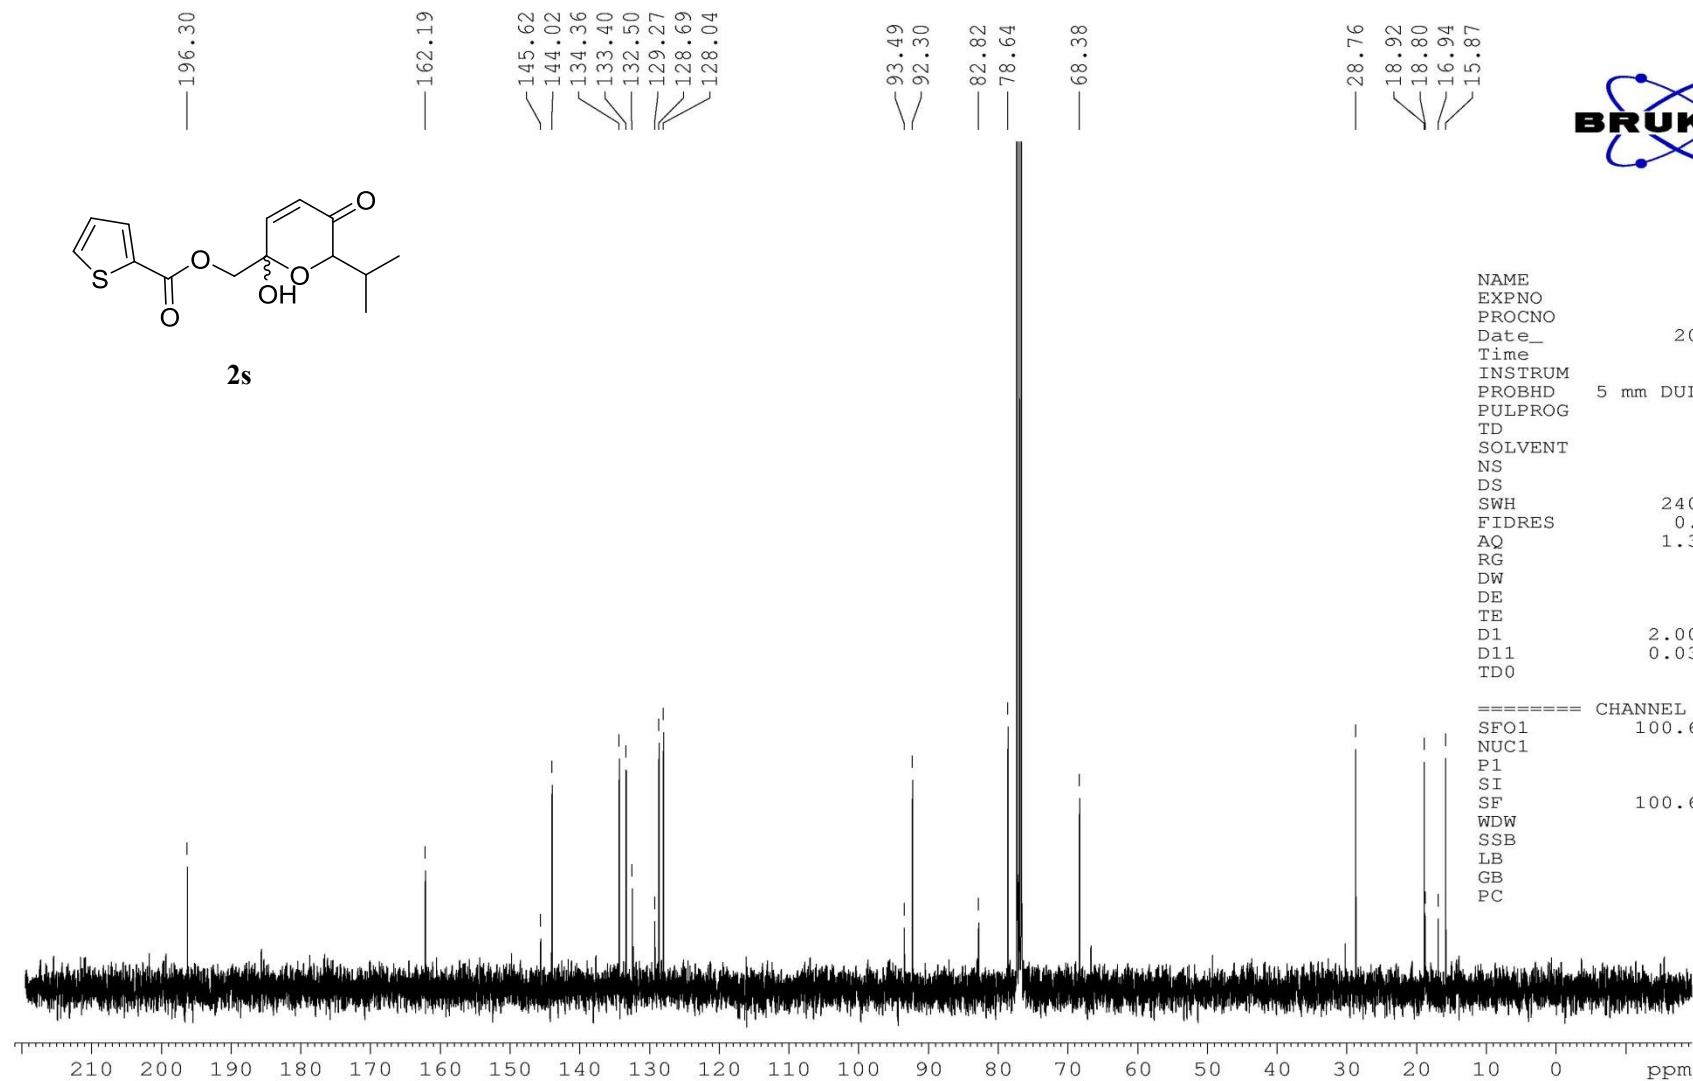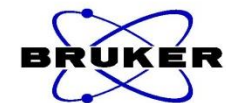

```

NAME                zgpg127
EXPNO                2
PROCNO              1
Date_               20180718
Time                16.27
INSTRUM             spect
PROBHD              5 mm DUL 13C-1
PULPROG             zgpg30
TD                  65536
SOLVENT             CDC13
NS                   160
DS                    0
SWH                 24038.461 Hz
FIDRES              0.366798 Hz
AQ                  1.3631988 sec
RG                   196.92
DW                  20.800 usec
DE                    6.50 usec
TE                   296.1 K
D1                   2.00000000 sec
D11                  0.03000000 sec
TD0                  1
  
```

```

===== CHANNEL f1 =====
SFO1             100.6228298 MHz
NUC1              13C
P1                 9.60 usec
SI                 32768
SF                100.6127690 MHz
WDW                EM
SSB                 0
LB                 1.00 Hz
GB                  0
PC                 1.40
  
```



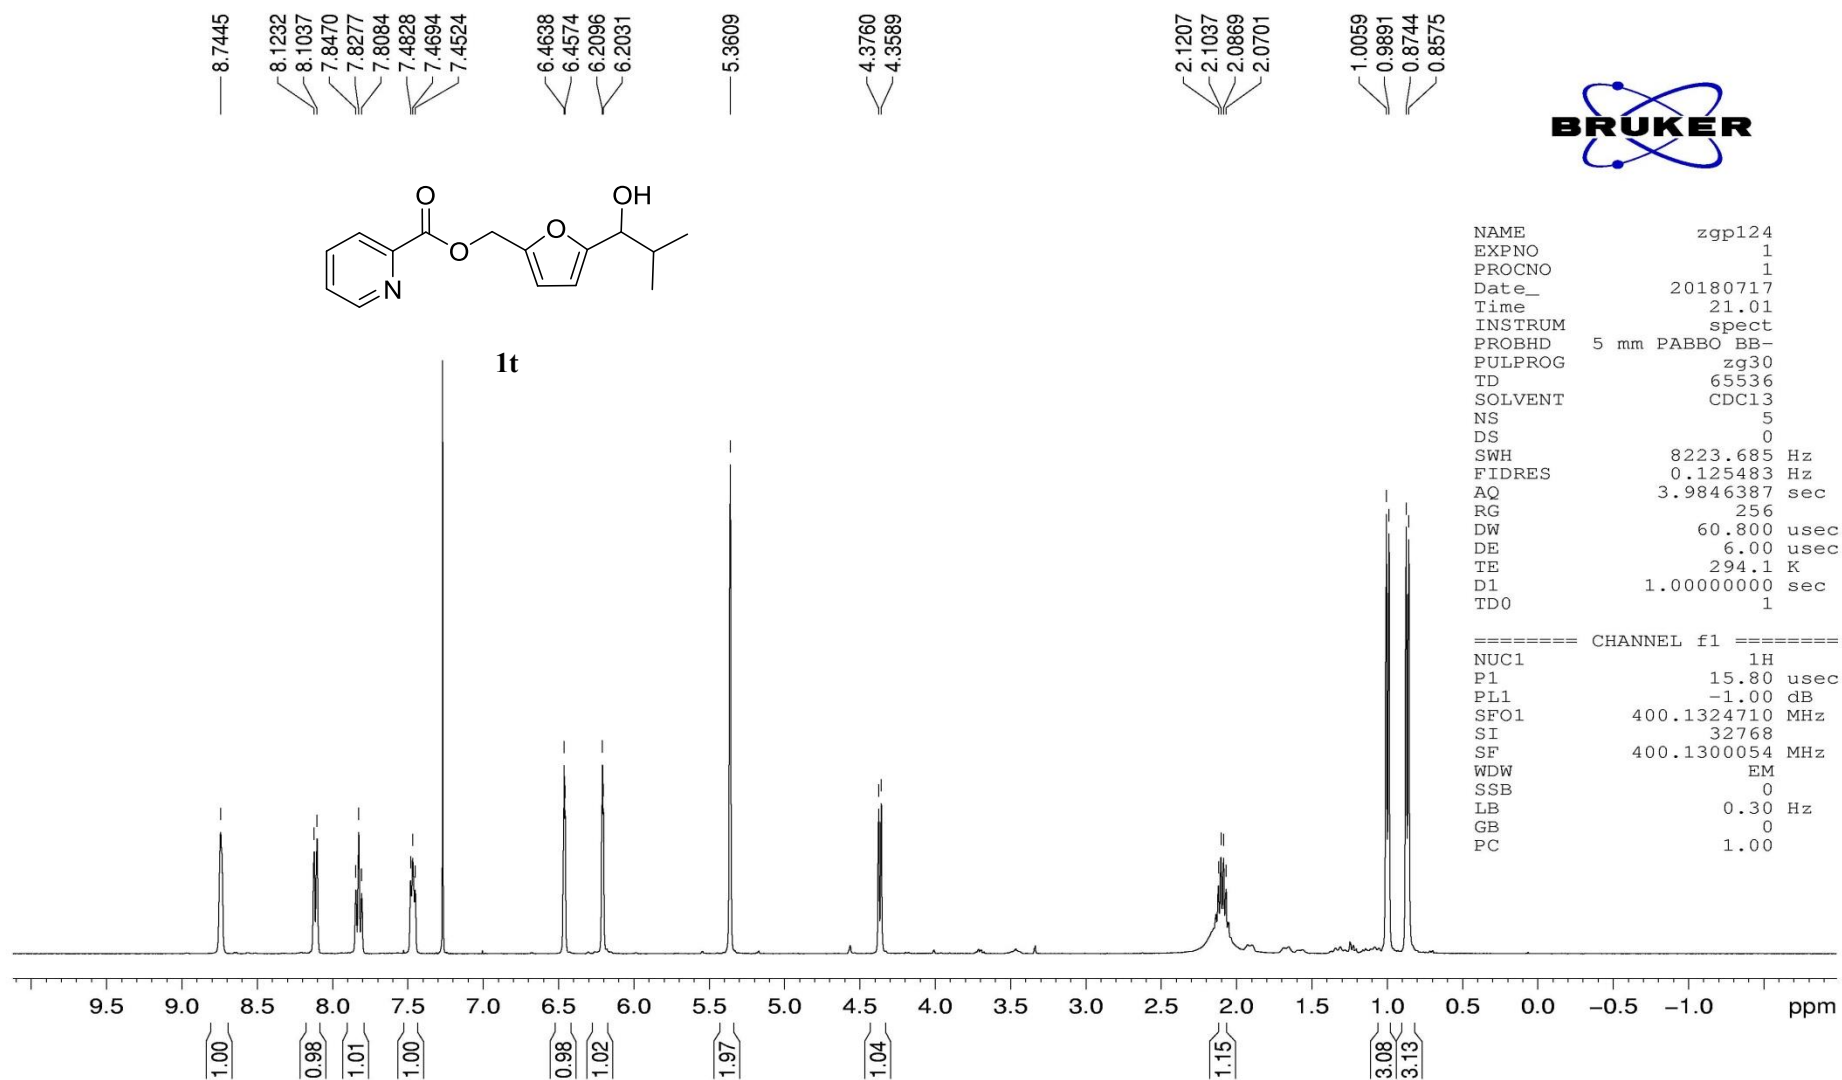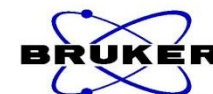

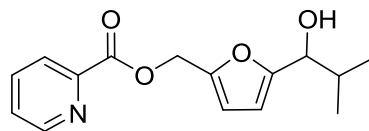

1t

—164.16  
—156.70  
149.28  
147.47  
147.16  
—136.40  
126.39  
124.71  
—111.48  
—106.81

—72.79

—58.71

—32.58

18.14  
17.40

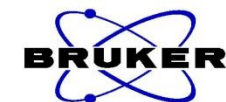

```
NAME                zgp124
EXPNO                2
PROCNO              1
Date_               20180717
Time                21.04
INSTRUM             spect
PROBHD              5 mm PABBO BB-
PULPROG             zgpg30
TD                  65536
SOLVENT             CDCl3
NS                   74
DS                   0
SWH                 24038.461 Hz
FIDRES              0.366798 Hz
AQ                  1.3631988 sec
RG                   114
DW                  20.800 usec
DE                   6.00 usec
TE                  294.6 K
D1                  2.00000000 sec
d11                  0.03000000 sec
DELTA               1.89999998 sec
TD0                  1
```

```
===== CHANNEL f1 =====
NUC1                  13C
P1                     8.60 usec
PL1                    -3.00 dB
SFO1                 100.6228298 MHz
```

```
===== CHANNEL f2 =====
CPDPRG2             waltz16
NUC2                   1H
PCPD2                 80.00 usec
PL12                  14.39 dB
PL13                  18.00 dB
PL2                    -1.00 dB
SFO2                 400.1316005 MHz
SI                    32768
SF                   100.6128330 MHz
WDW                    EM
SSB                     0
LB                     1.00 Hz
GB                     0
PC                     1.40
```

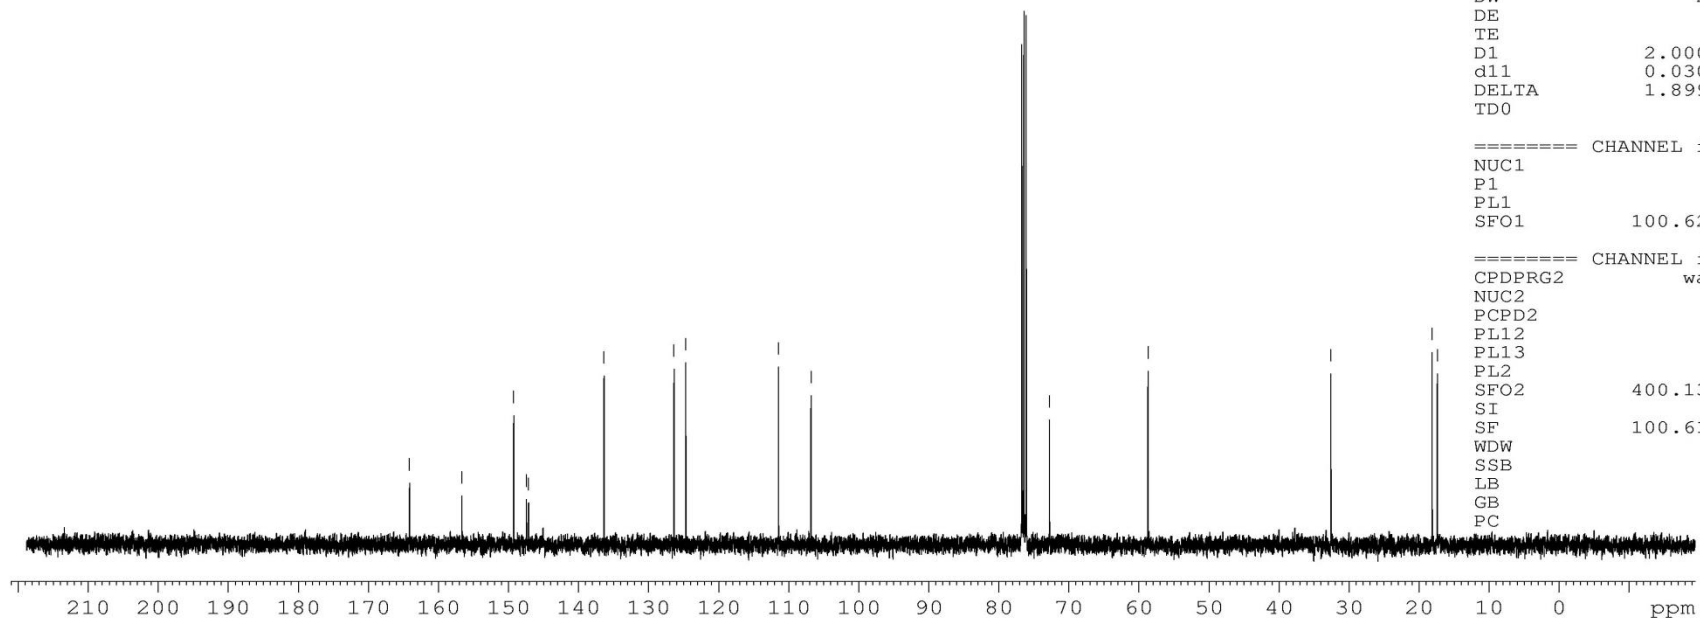

8.8069  
8.7960  
8.2069  
8.1873  
8.1582  
7.9492  
7.9299  
7.9109  
7.5950  
7.5833  
7.5763  
7.5648  
7.2845  
7.0227  
6.9971  
6.9677  
6.9418  
6.2125  
6.1864  
6.1684  
6.1428

4.9477  
4.9190  
4.7889  
4.7605  
4.4562  
4.4510  
4.4442  
4.4281  
4.3497  
4.3210

2.4837  
2.4718  
2.4665  
2.4546  
2.4490  
2.4378  
2.4319  
2.4208

0.9966  
0.9791  
0.9557  
0.9406  
0.9258  
0.8385  
0.8215

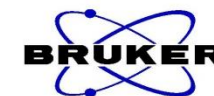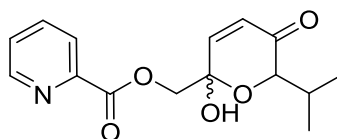

2t

NAME zgpl26  
EXPNO 1  
PROCNO 1  
Date\_ 20180718  
Time 12.33  
INSTRUM spect  
PROBHD 5 mm DUL 13C-1  
PULPROG zg30  
TD 65536  
SOLVENT CDCl3  
NS 6  
DS 0  
SWH 8012.820 Hz  
FIDRES 0.122266 Hz  
AQ 4.0894966 sec  
RG 164.33  
DW 62.400 usec  
DE 6.50 usec  
TE 296.6 K  
D1 1.00000000 sec  
TD0 1

===== CHANNEL f1 =====  
SFO1 400.1324710 MHz  
NUC1 1H  
P1 14.30 usec  
SI 65536  
SF 400.1300000 MHz  
WDW EM  
SSB 0  
LB 0.30 Hz  
GB 0  
PC 1.00

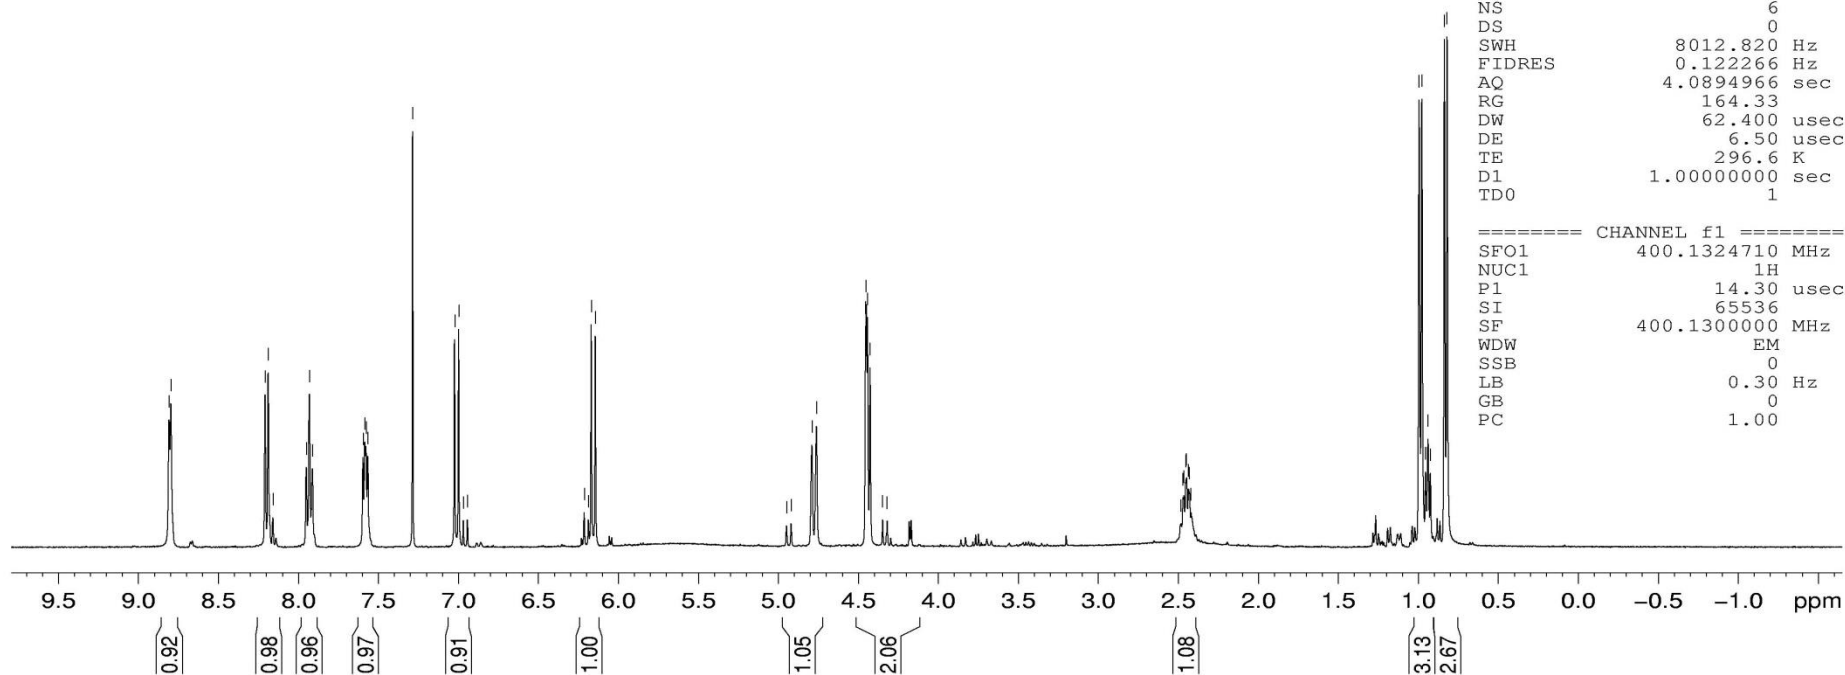

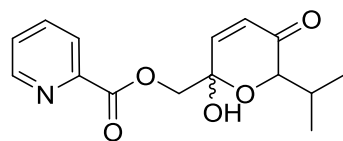

2t

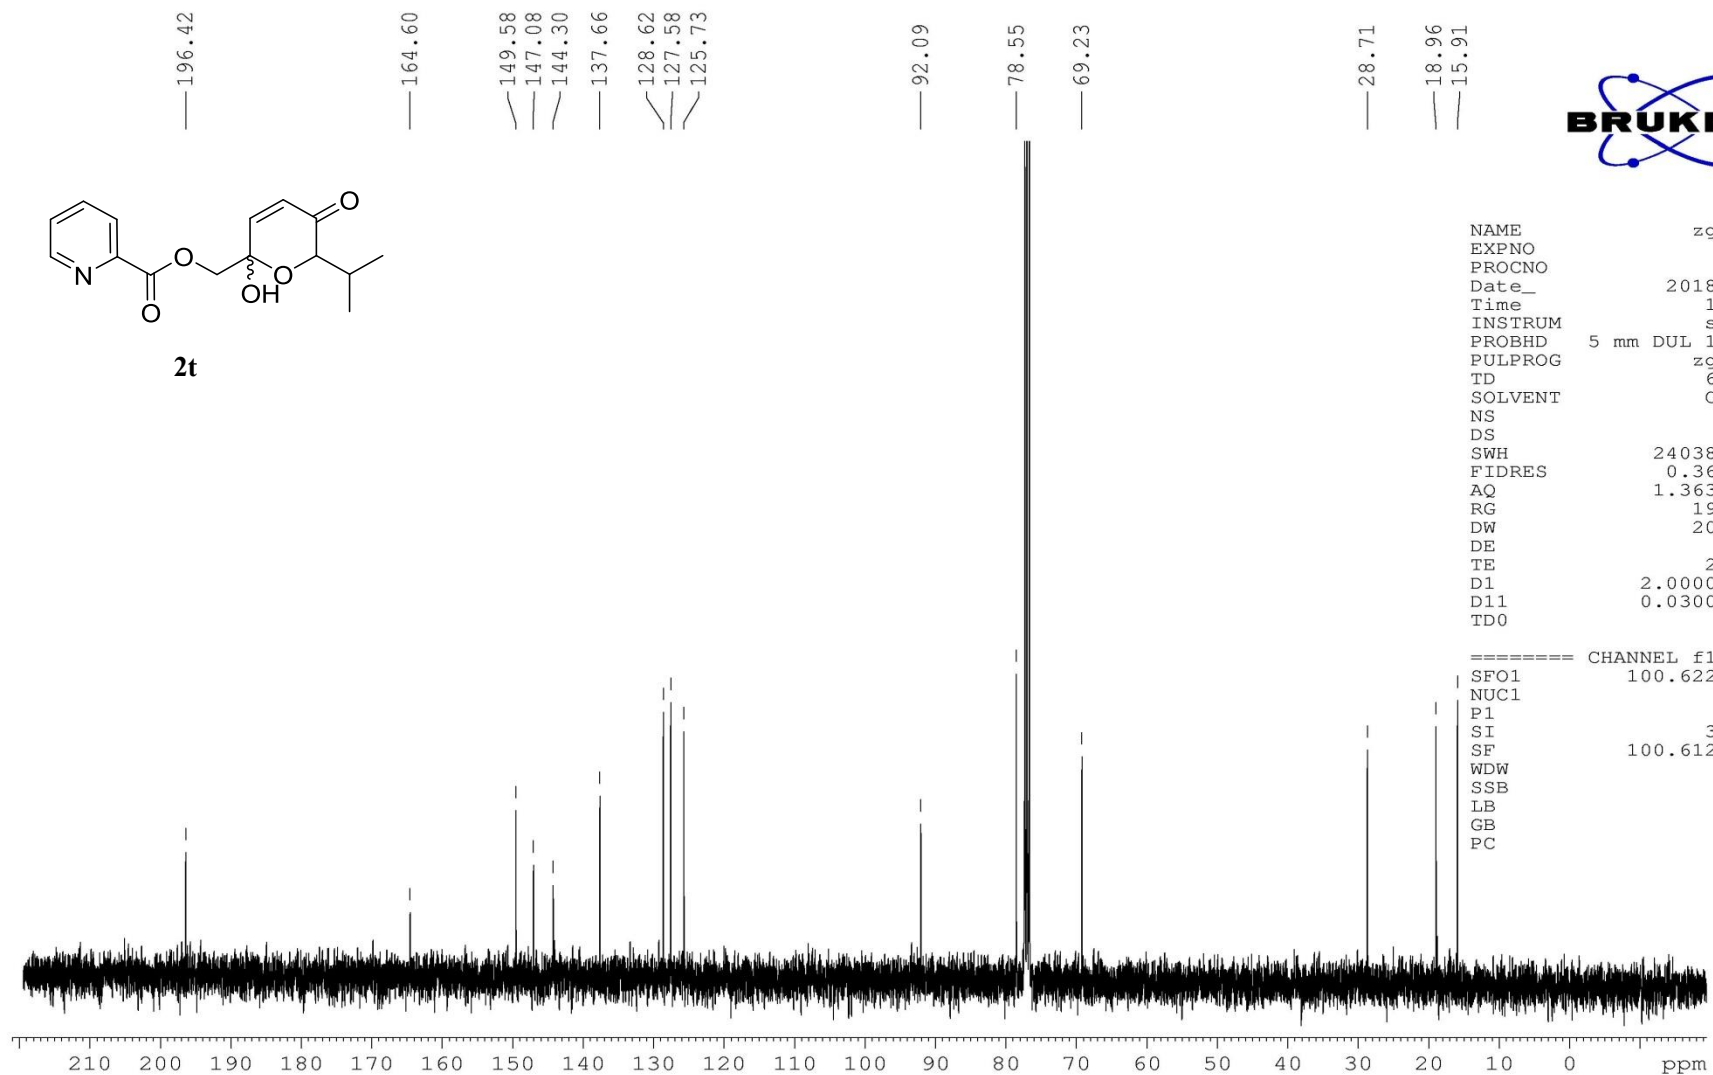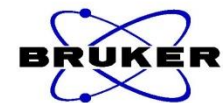

```

NAME                zgp126
EXPNO                2
PROCNO              1
Date_               20180718
Time                12.38
INSTRUM             spect
PROBHD              5 mm DUL 13C-1
PULPROG             zgpg30
TD                  65536
SOLVENT             CDC13
NS                   354
DS                   0
SWH                 24038.461 Hz
FIDRES              0.366798 Hz
AQ                  1.3631988 sec
RG                   196.92
DW                  20.800 usec
DE                   6.50 usec
TE                   297.1 K
D1                   2.00000000 sec
D11                  0.03000000 sec
TD0                  1
  
```

```

===== CHANNEL f1 =====
SFO1                100.6228298 MHz
NUC1                 13C
P1                   9.60 usec
SI                   32768
SF                  100.6127690 MHz
WDW                  EM
SSB                  0
LB                   1.00 Hz
GB                   0
PC                   1.40
  
```

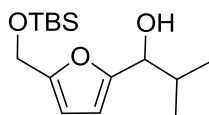

**1u**

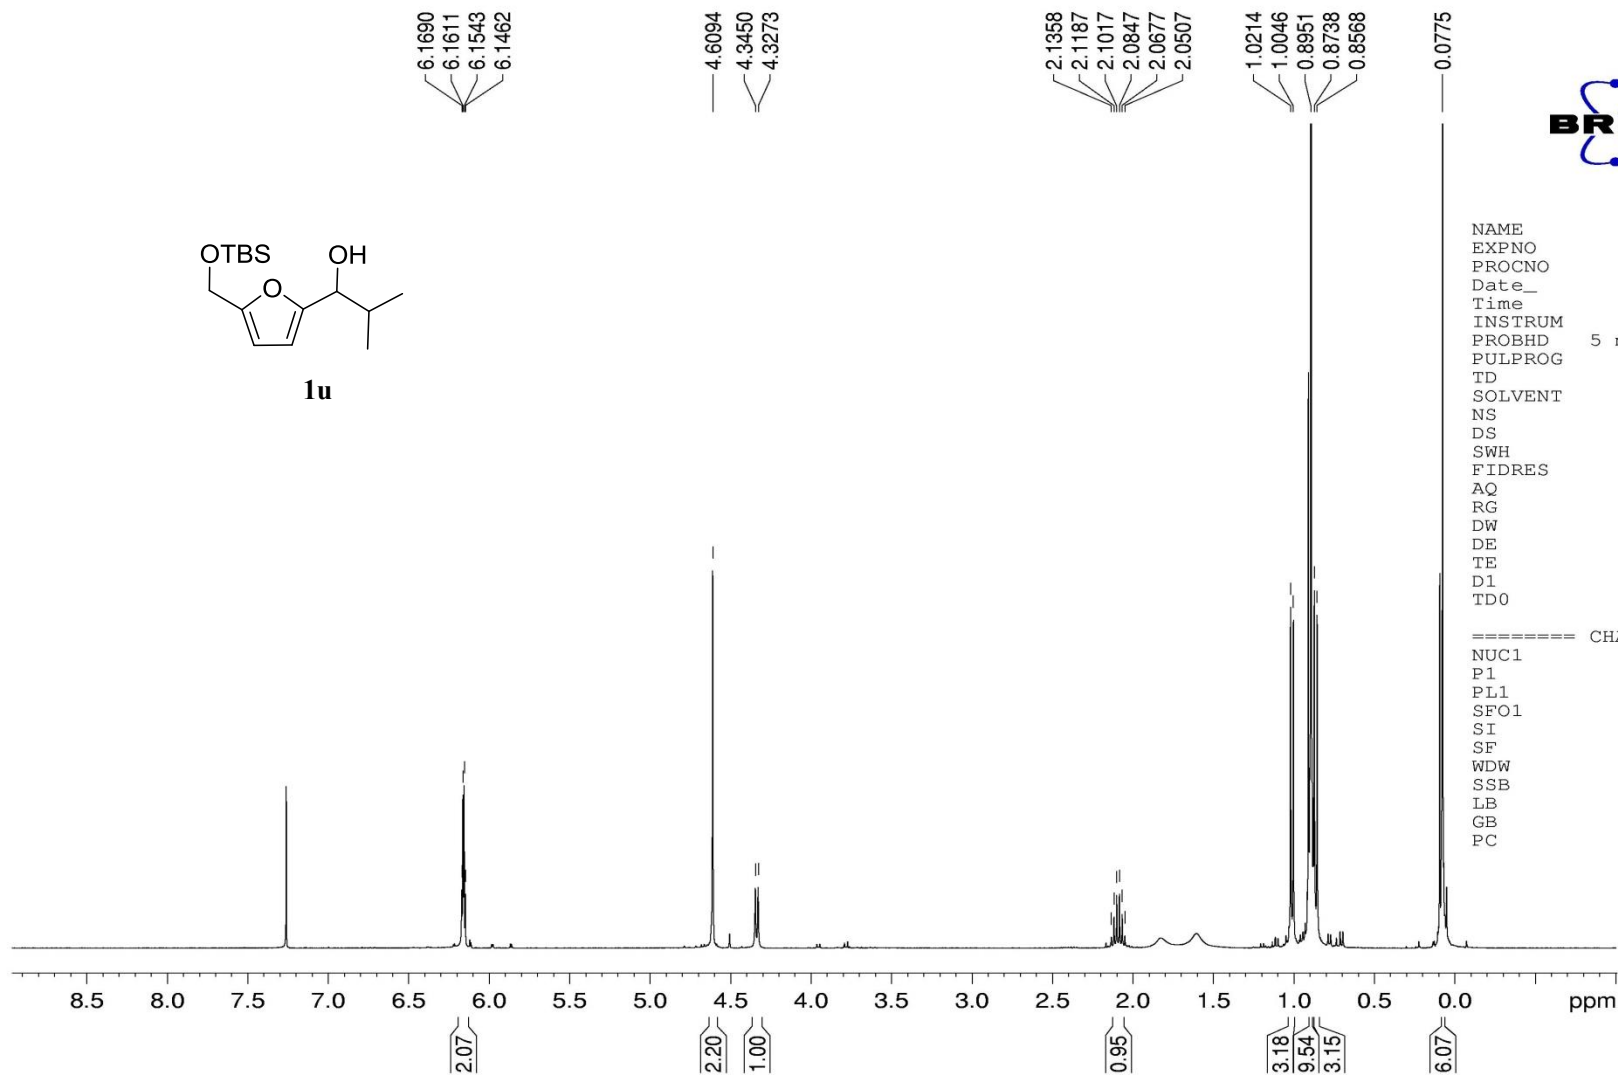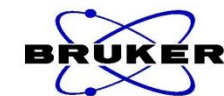

NAME zgp71  
 EXPNO 1  
 PROCNO 1  
 Date\_ 20180619  
 Time 17.41  
 INSTRUM spect  
 PROBHD 5 mm PABBO BB-  
 PULPROG zg30  
 TD 65536  
 SOLVENT CDCl3  
 NS 5  
 DS 0  
 SWH 8223.685 Hz  
 FIDRES 0.125483 Hz  
 AQ 3.9846387 sec  
 RG 287  
 DW 60.800 usec  
 DE 6.00 usec  
 TE 295.9 K  
 D1 1.00000000 sec  
 TD0 1

===== CHANNEL f1 =====  
 NUC1 1H  
 P1 15.80 usec  
 PL1 -1.00 dB  
 SFO1 400.1324710 MHz  
 SI 32768  
 SF 400.1300097 MHz  
 WDW EM  
 SSB 0  
 LB 0.30 Hz  
 GB 0  
 PC 1.00

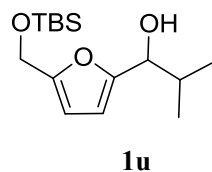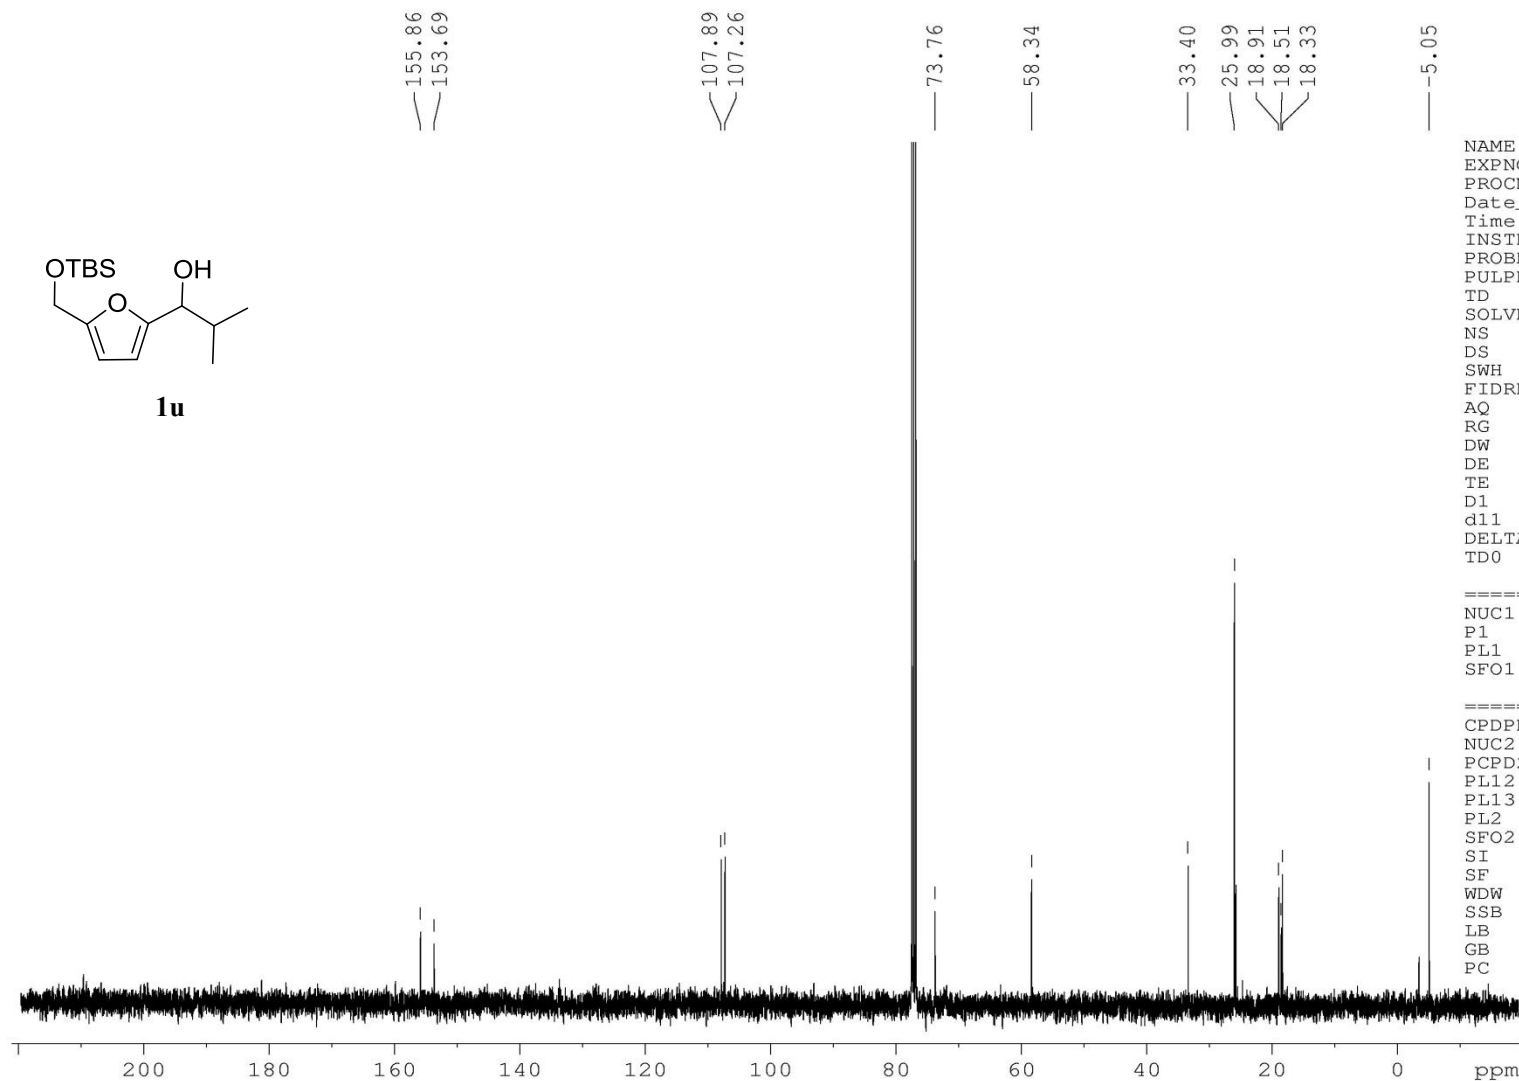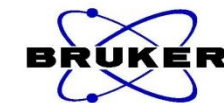

```

NAME                zgp71
EXPNO                2
PROCNO              1
Date_               20180619
Time                17.46
INSTRUM             spect
PROBHD              5 mm PABBO BB-
PULPROG             zgpq30
TD                  65536
SOLVENT             CDC13
NS                   123
DS                   0
SWH                 24038.461 Hz
FIDRES              0.366798 Hz
AQ                  1.3631988 sec
RG                   128
DW                  20.800 usec
DE                   6.00 usec
TE                  296.3 K
D1                  2.00000000 sec
d11                  0.03000000 sec
DELTA                1.89999998 sec
TD0                  1
  
```

```

===== CHANNEL f1 =====
NUC1                 13C
P1                   8.60 usec
PL1                  -3.00 dB
SFO1                 100.6228298 MHz
  
```

```

===== CHANNEL f2 =====
CPDPRG2             waltz16
NUC2                 1H
PCPD2               80.00 usec
PL12                 14.39 dB
PL13                 18.00 dB
PL2                  -1.00 dB
SFO2                 400.1316005 MHz
SI                   32768
SF                   100.6127548 MHz
WDW                  EM
SSB                   0
LB                   1.00 Hz
GB                   0
PC                   1.40
  
```

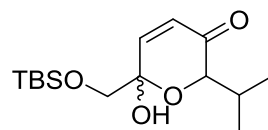

2u

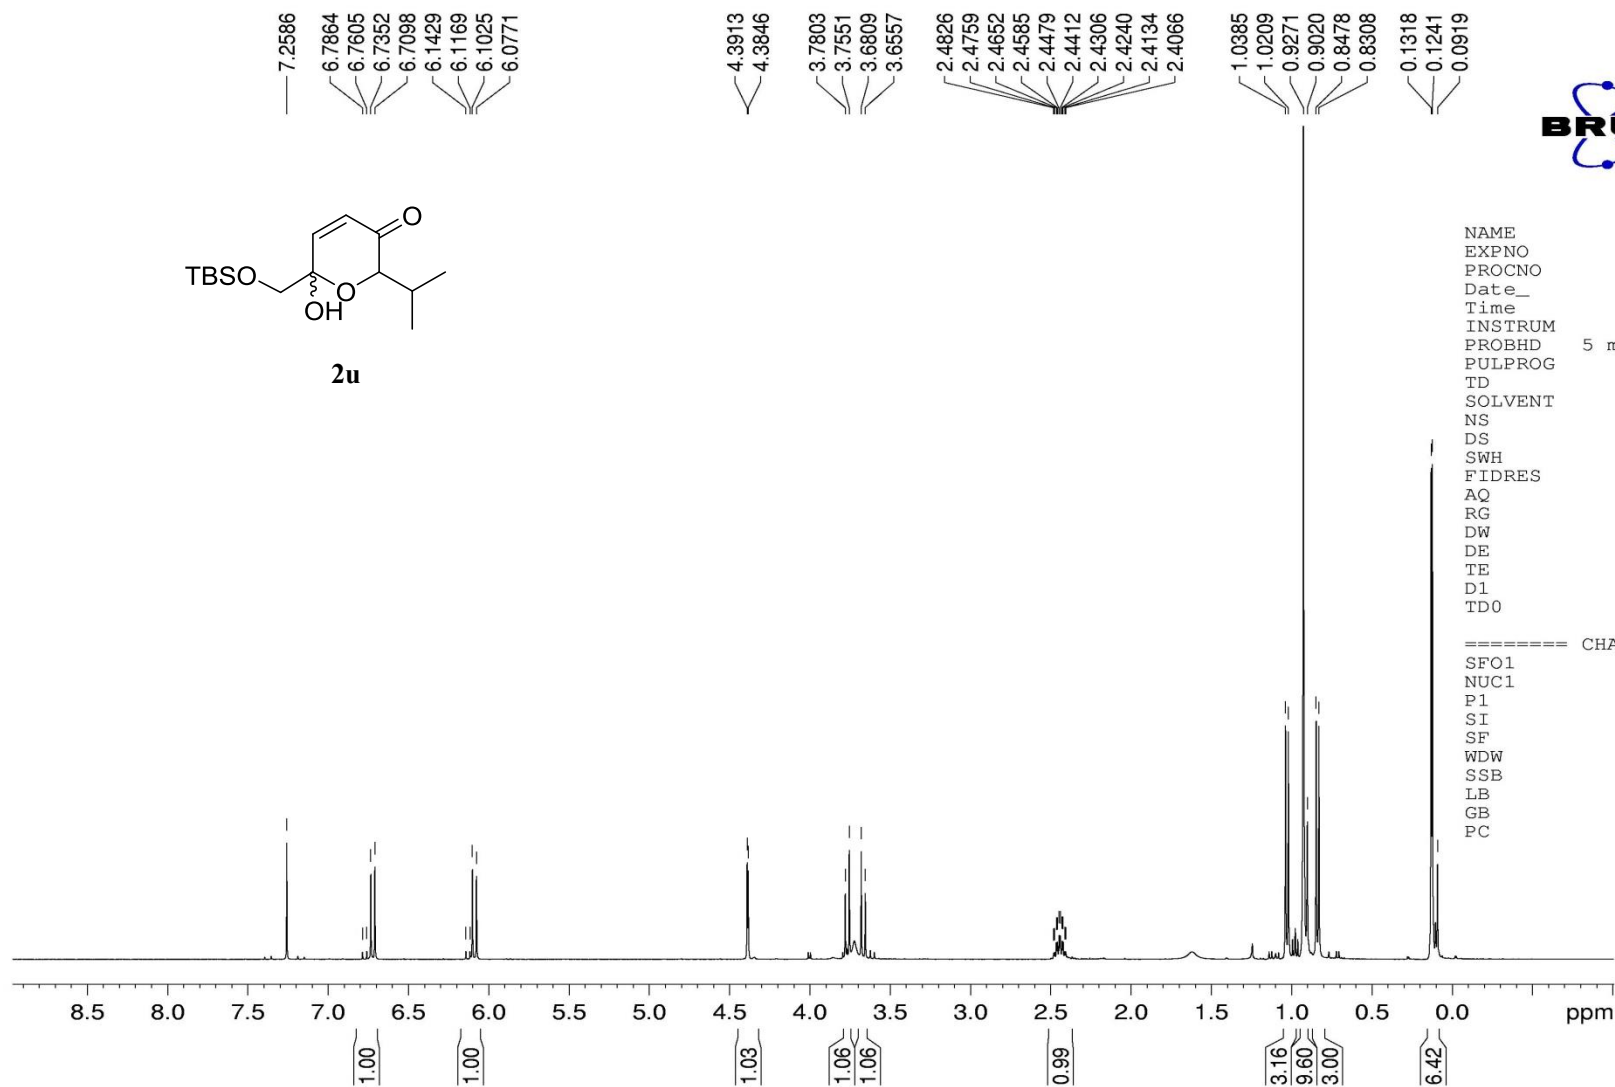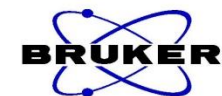

```

NAME                zgp78
EXPNO                31
PROCNO              1
Date_                20180620
Time                20.25
INSTRUM              spect
PROBHD               5 mm DUL 13C-1
PULPROG              zg30
TD                   65536
SOLVENT              CDC13
NS                    2
DS                     0
SWH                  8012.820 Hz
FIDRES               0.122266 Hz
AQ                   4.0894966 sec
RG                    103.52
DW                   62.400 usec
DE                    6.50 usec
TE                   295.4 K
D1                   1.00000000 sec
TD0                   1

===== CHANNEL f1 =====
SFO1                 400.1324710 MHz
NUC1                  1H
P1                   14.30 usec
SI                   65536
SF                   400.1300102 MHz
WDW                   EM
SSB                    0
LB                   0.30 Hz
GB                    0
PC                    1.00
  
```

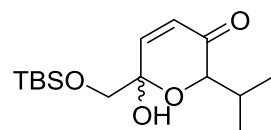

2u

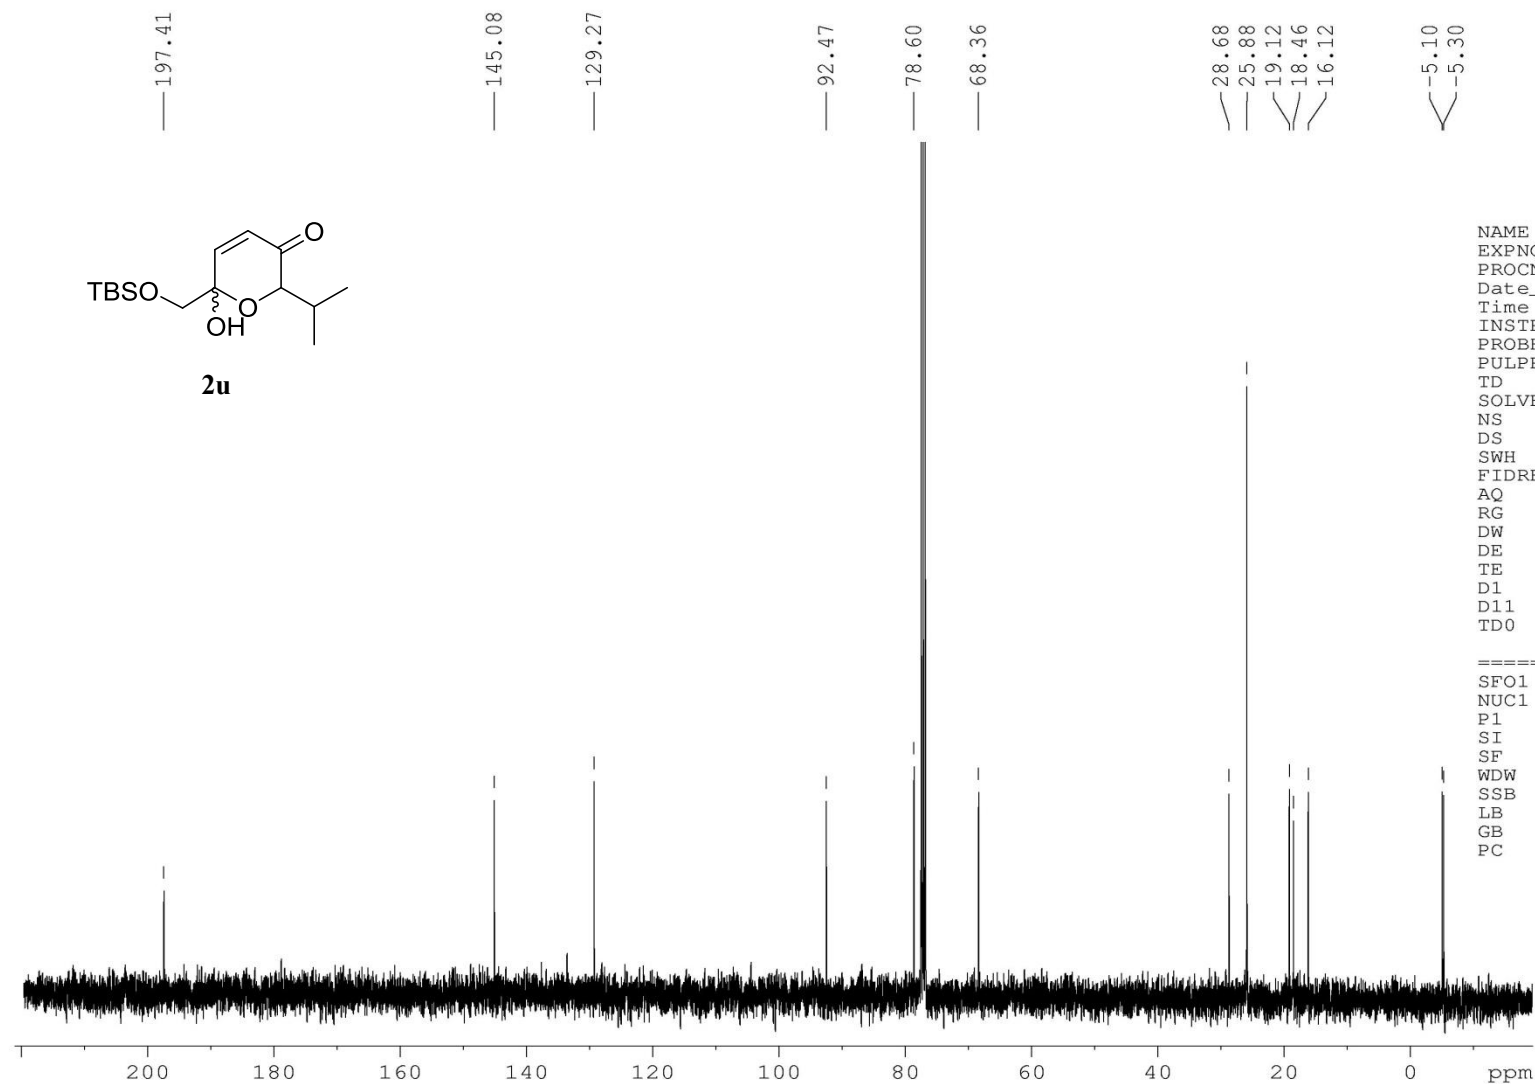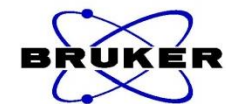

```

NAME                zgp78
EXPNO                32
PROCNO               1
Date_                20180620
Time_                20.31
INSTRUM              spect
PROBHD               5 mm DUL 13C-1
PULPROG              zgpg30
TD                   65536
SOLVENT              CDCl3
NS                   111
DS                    0
SWH                  24038.461 Hz
FIDRES               0.366798 Hz
AQ                   1.3631988 sec
RG                   196.92
DW                   20.800 usec
DE                    6.50 usec
TE                   295.9 K
D1                   2.00000000 sec
D11                  0.03000000 sec
TD0                  1
  
```

```

===== CHANNEL f1 =====
SFO1                100.6228298 MHz
NUC1                 13C
P1                   9.60 usec
SI                   32768
SF                  100.6127577 MHz
WDW                  EM
SSB                  0
LB                   1.00 Hz
GB                   0
PC                   1.40
  
```



7.3712  
7.3668  
7.3504  
7.3398  
7.3197  
7.3094  
7.2982  
7.2878  
7.2756  
7.2590  
6.2782  
6.2704  
6.1939  
6.1861

4.5378  
4.4638  
4.3725  
4.3552

2.1573  
2.1404  
2.1234  
2.1065  
2.0895  
2.0726  
1.9702

1.0297  
1.0129  
0.8921  
0.8751

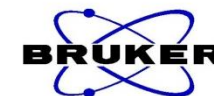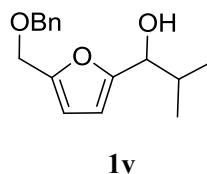

NAME zgp69-1-1  
EXPNO 4  
PROCNO 1  
Date\_ 20180619  
Time 15.02  
INSTRUM spect  
PROBHD 5 mm PABBO BB-  
PULPROG zg30  
TD 65536  
SOLVENT CDCl3  
NS 4  
DS 0  
SWH 8223.685 Hz  
FIDRES 0.125483 Hz  
AQ 3.9846387 sec  
RG 203  
DW 60.800 usec  
DE 6.00 usec  
TE 295.4 K  
D1 1.00000000 sec  
TD0 1

===== CHANNEL f1 =====  
NUC1 1H  
P1 15.80 usec  
PL1 -1.00 dB  
SFO1 400.1324710 MHz  
SI 32768  
SF 400.1300098 MHz  
WDW EM  
SSB 0  
LB 0.30 Hz  
GB 0  
PC 1.00

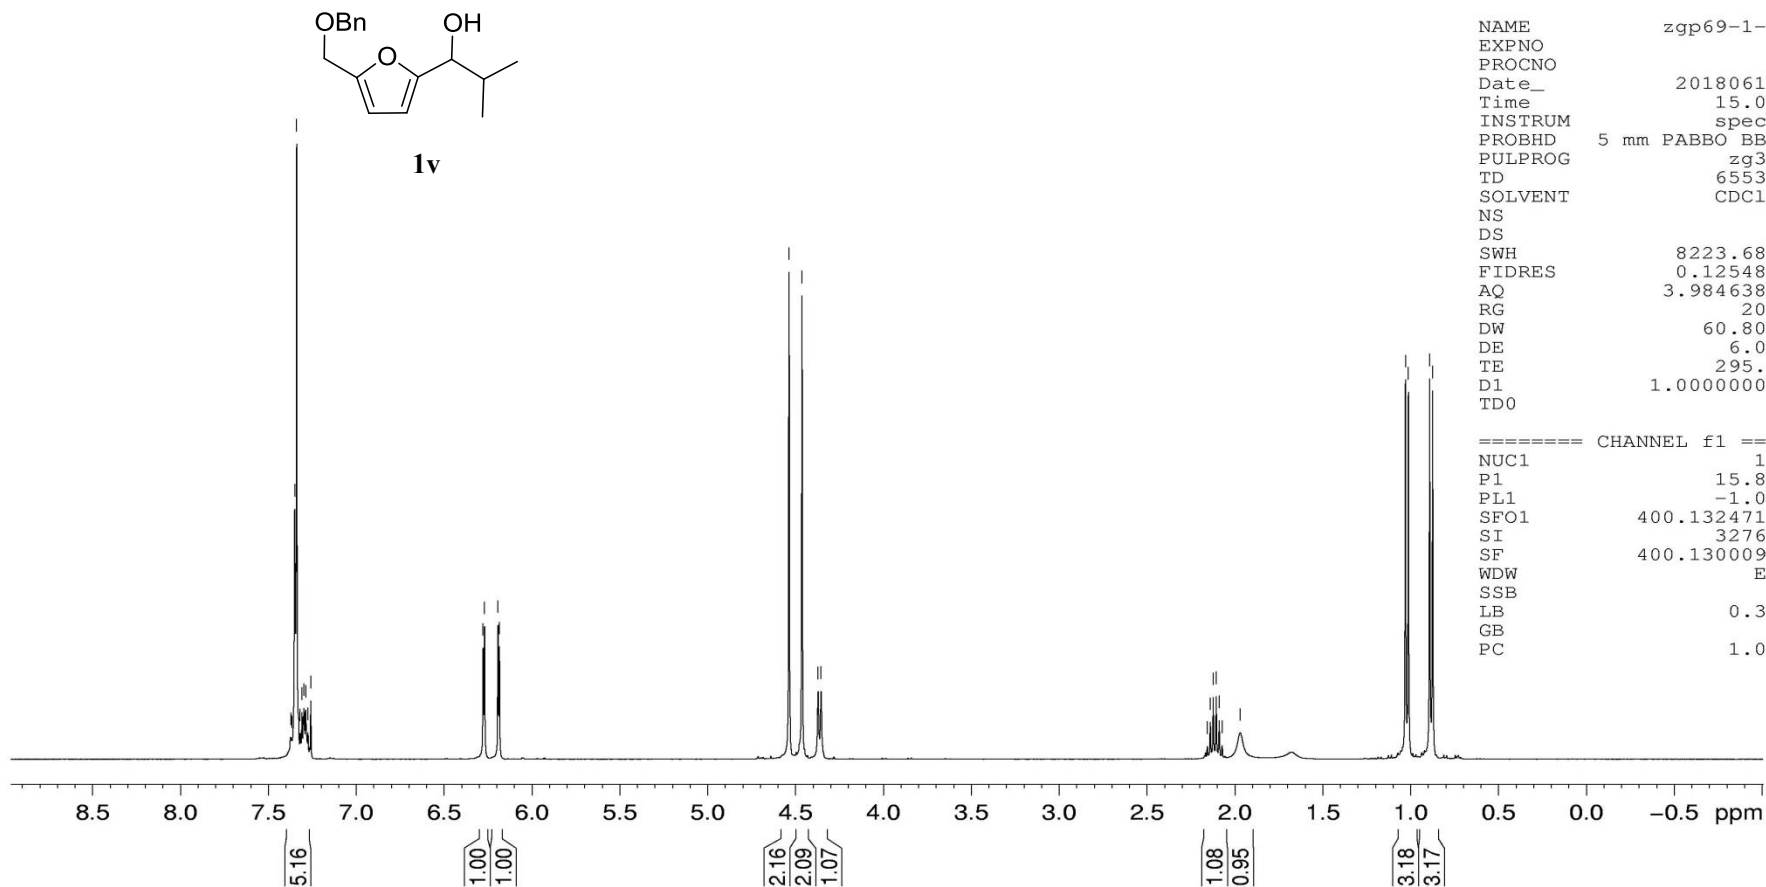

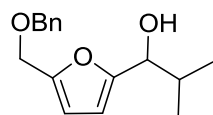

**1v**

—156.74  
 —151.04  
 —138.05  
 128.52  
 128.02  
 127.82  
 —110.17  
 —107.22  
 73.65  
 71.91  
 —64.07  
 —33.39  
 18.90  
 18.21

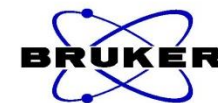

NAME zgp69-1-1  
 EXPNO 2  
 PROCNO 1  
 Date\_ 20180619  
 Time 14.50  
 INSTRUM spect  
 PROBHD 5 mm DUL 13C-1  
 PULPROG zgpg30  
 TD 65536  
 SOLVENT CDC13  
 NS 124  
 DS 0  
 SWH 24038.461 Hz  
 FIDRES 0.366798 Hz  
 AQ 1.3631988 sec  
 RG 196.92  
 DW 20.800 usec  
 DE 6.50 usec  
 TE 301.7 K  
 D1 2.00000000 sec  
 D11 0.03000000 sec  
 TD0 1

===== CHANNEL f1 =====  
 SFO1 100.6228298 MHz  
 NUC1 13C  
 P1 9.60 usec  
 SI 32768  
 SF 100.6127584 MHz  
 WDW EM  
 SSB 0  
 LB 1.00 Hz  
 GB 0  
 PC 1.40

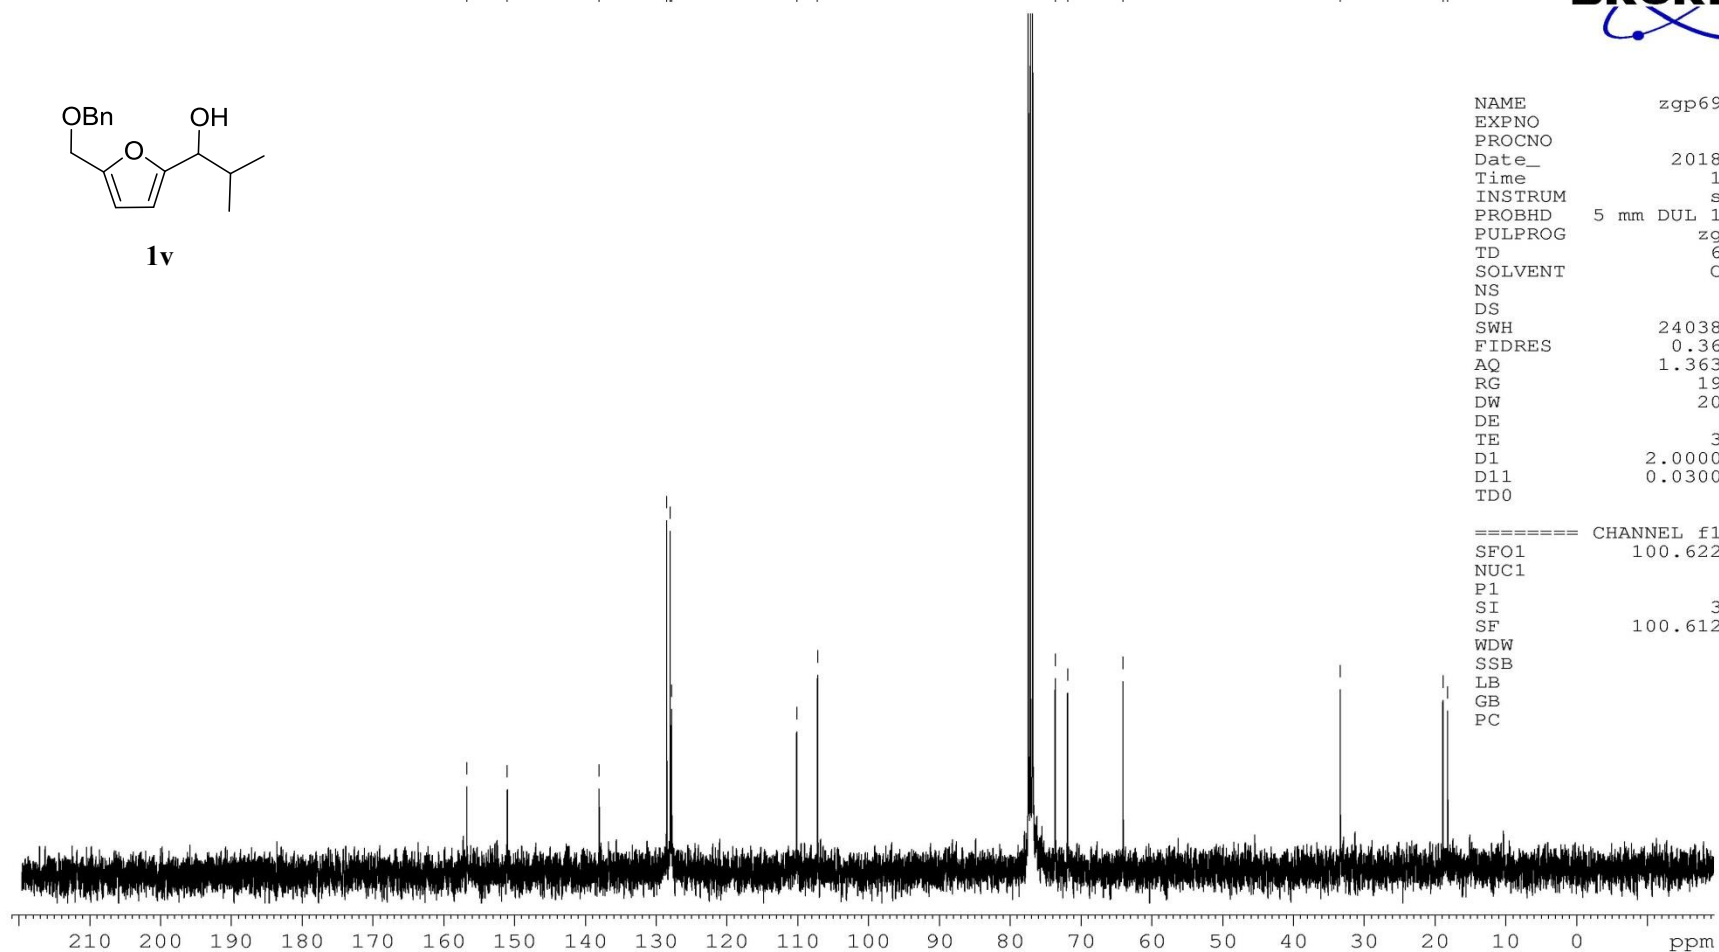

7.3985  
7.3801  
7.3776  
7.3713  
7.3648  
7.3500  
7.3426  
7.3373  
7.3304  
7.3210  
7.3128  
7.3068  
7.2595  
6.8085  
6.8018  
6.7826  
6.7763  
6.1035  
6.0780

4.7974  
4.7675  
4.6959  
4.6660  
4.4332  
4.4264

3.6758  
3.6496  
3.6235  
3.5974  
3.5623

2.5057  
2.4989  
2.4885  
2.4816  
2.4711  
2.4643  
2.4539  
2.4470  
2.4367  
2.4298

1.0749  
1.0574  
1.0146  
0.9971  
0.9927  
0.9759  
0.8781  
0.8611

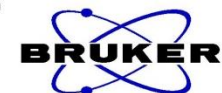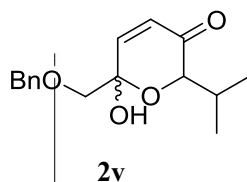

```

NAME                zgp79
EXPNO                21
PROCNO               1
Date_                20180621
Time                11.47
INSTRUM              spect
PROBHD               5 mm DUL 13C-1
PULPROG              zg30
TD                   65536
SOLVENT              CDCl3
NS                    1
DS                    0
SWH                  8012.820 Hz
FIDRES               0.122266 Hz
AQ                   4.0894966 sec
RG                   103.52
DW                   62.400 usec
DE                   6.50 usec
TE                   295.8 K
D1                   1.00000000 sec
TD0                  1
  
```

```

===== CHANNEL f1 =====
SFO1                 400.1324710 MHz
NUC1                  1H
P1                   14.30 usec
SI                   65536
SF                   400.1300099 MHz
WDW                   EM
SSB                    0
LB                   0.30 Hz
GB                    0
PC                    1.00
  
```

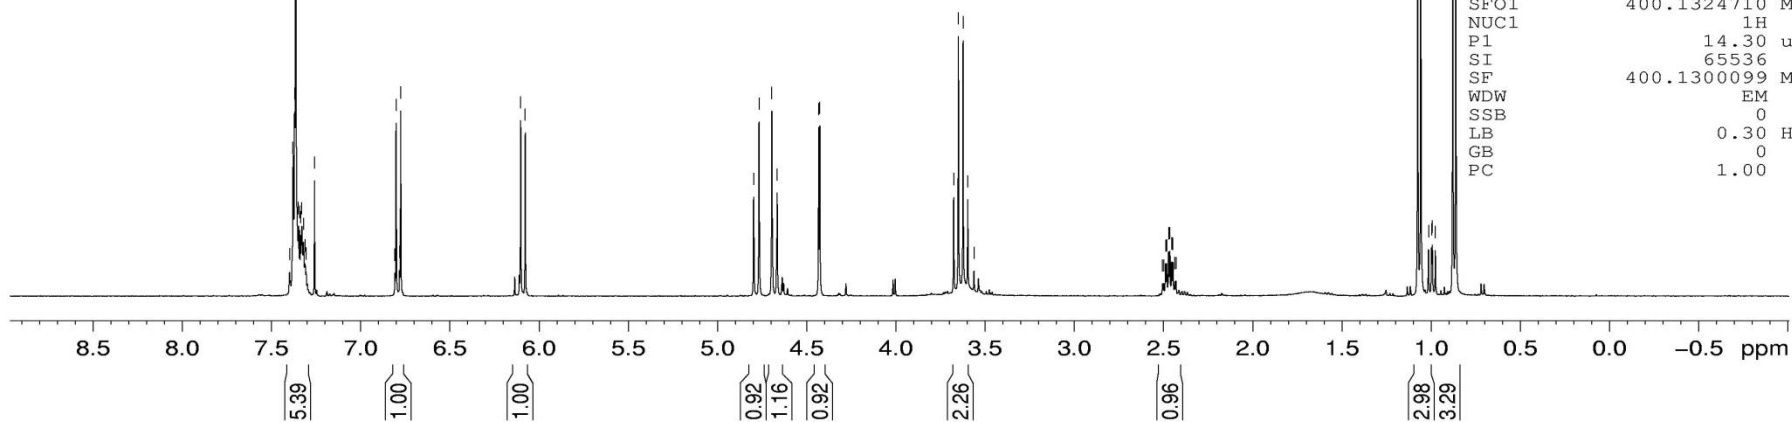

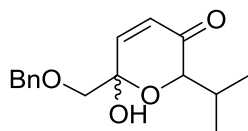

2v

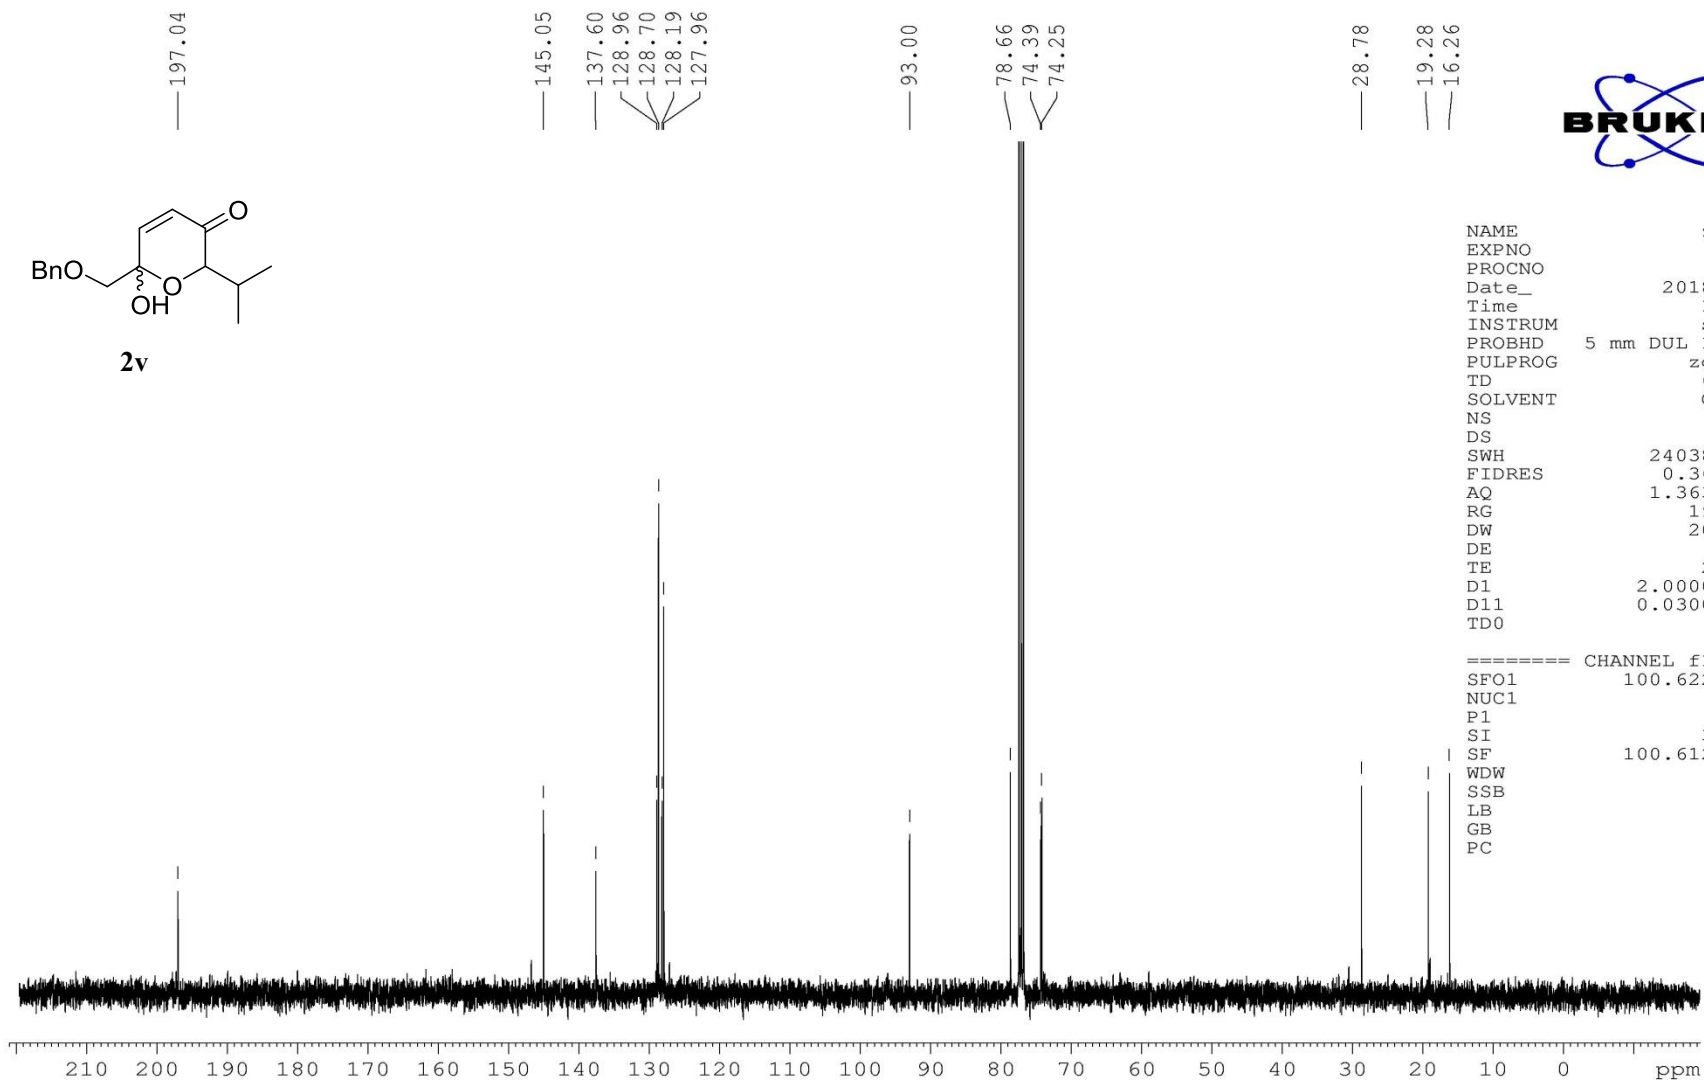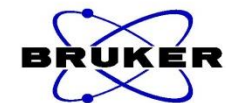

```

NAME                zgp79
EXPNO                22
PROCNO              1
Date_               20180621
Time                11.49
INSTRUM             spect
PROBHD              5 mm DUL 13C-1
PULPROG             zgpg30
TD                  65536
SOLVENT             CDCl3
NS                   88
DS                   0
SWH                 24038.461 Hz
FIDRES              0.366798 Hz
AQ                  1.3631988 sec
RG                   196.92
DW                  20.800 usec
DE                   6.50 usec
TE                  296.2 K
D1                   2.00000000 sec
D11                  0.03000000 sec
TD0                  1
  
```

```

===== CHANNEL f1 =====
SFO1                100.6228298 MHz
NUC1                 13C
P1                   9.60 usec
SI                   32768
SF                  100.6127567 MHz
WDW                  EM
SSB                   0
LB                   1.00 Hz
GB                   0
PC                   1.40
  
```

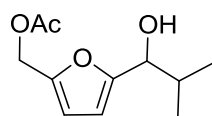

**1w**

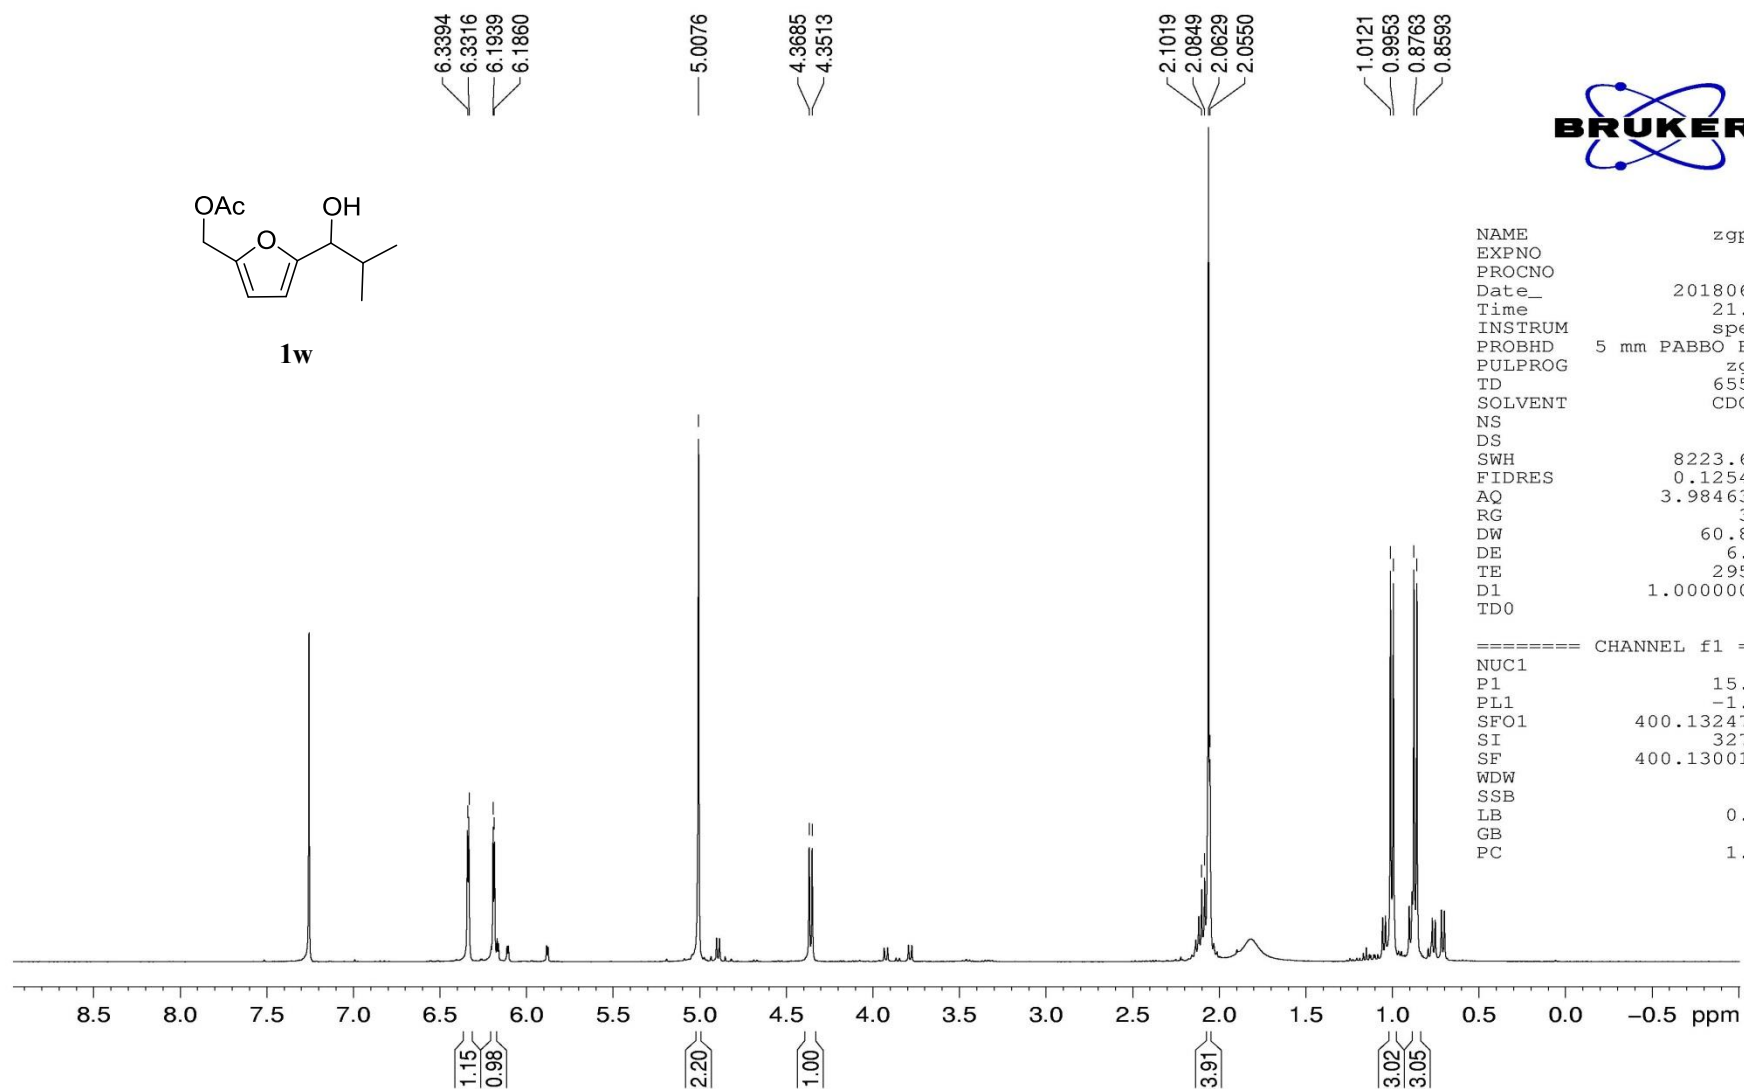

NAME zgp72  
 EXPNO 1  
 PROCNO 1  
 Date\_ 20180619  
 Time 21.42  
 INSTRUM spect  
 PROBHD 5 mm PABBO BB-  
 PULPROG zg30  
 TD 65536  
 SOLVENT CDCl3  
 NS 7  
 DS 0  
 SWH 8223.685 Hz  
 FIDRES 0.125483 Hz  
 AQ 3.9846387 sec  
 RG 322  
 DW 60.800 usec  
 DE 6.00 usec  
 TE 295.8 K  
 D1 1.00000000 sec  
 TD0 1

===== CHANNEL f1 =====  
 NUC1 1H  
 P1 15.80 usec  
 PL1 -1.00 dB  
 SFO1 400.1324710 MHz  
 SI 32768  
 SF 400.1300116 MHz  
 WDW EM  
 SSB 0  
 LB 0.30 Hz  
 GB 0  
 PC 1.00

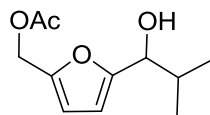

**1w**

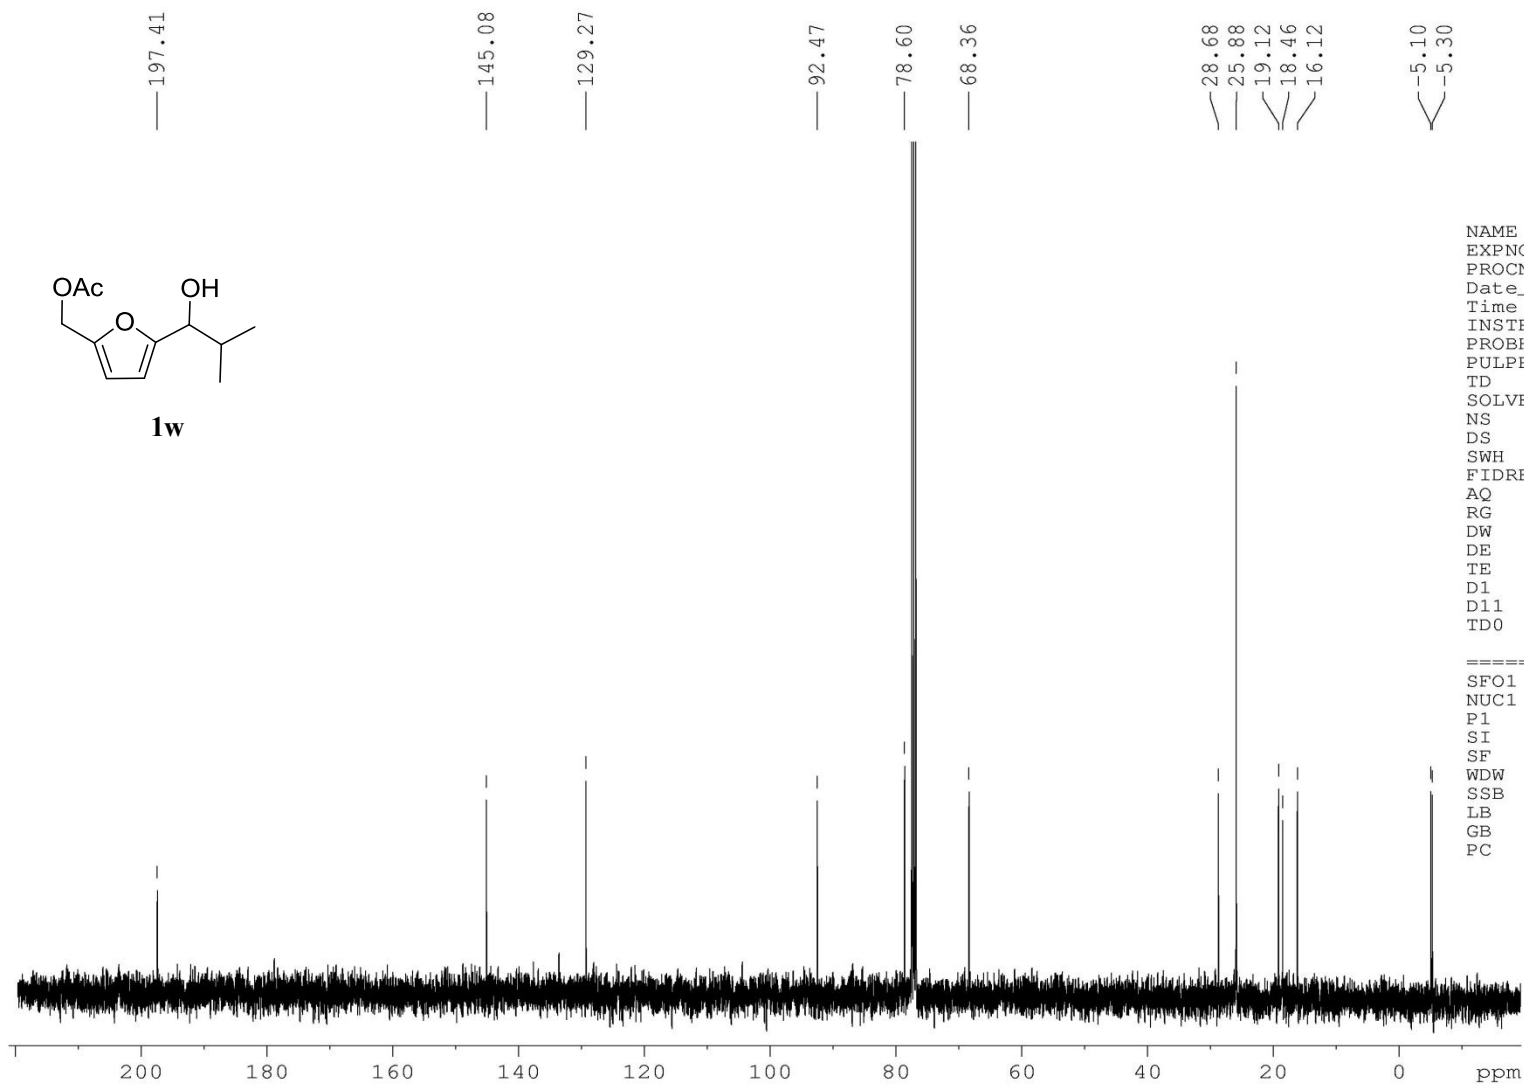

```

NAME                zgp78
EXPNO                32
PROCNO               1
Date_                20180620
Time                 20.31
INSTRUM              spect
PROBHD               5 mm DUL 13C-1
PULPROG              zgpg30
TD                   65536
SOLVENT              CDCl3
NS                   111
DS                    0
SWH                  24038.461 Hz
FIDRES               0.366798 Hz
AQ                   1.3631988 sec
RG                   196.92
DW                   20.800 usec
DE                   6.50 usec
TE                   295.9 K
D1                   2.00000000 sec
D11                  0.03000000 sec
TD0                  1
  
```

```

===== CHANNEL f1 =====
SFO1                100.6228298 MHz
NUC1                 13C
P1                   9.60 usec
SI                   32768
SF                  100.6127577 MHz
WDW                  EM
SSB                  0
LB                   1.00 Hz
GB                   0
PC                   1.40
  
```

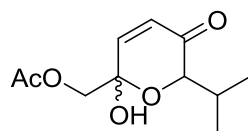

2w

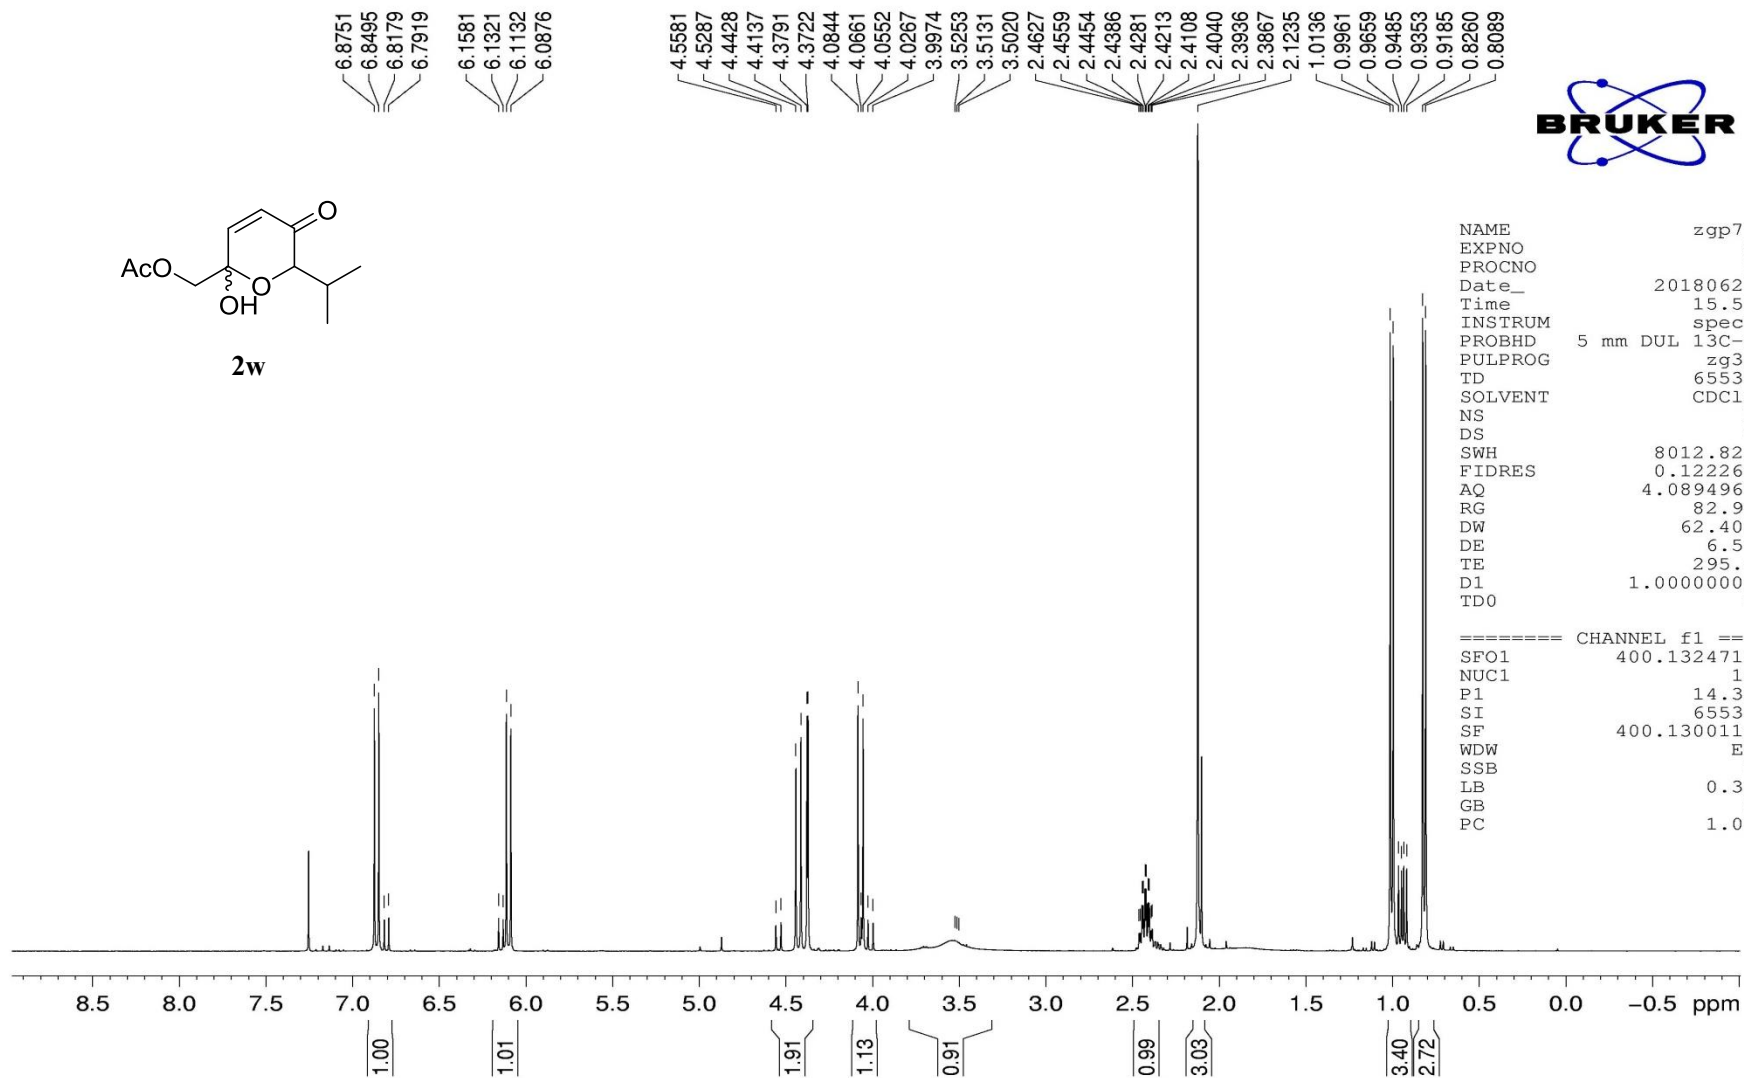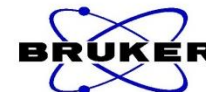

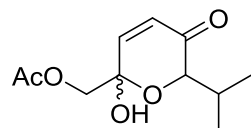

2w

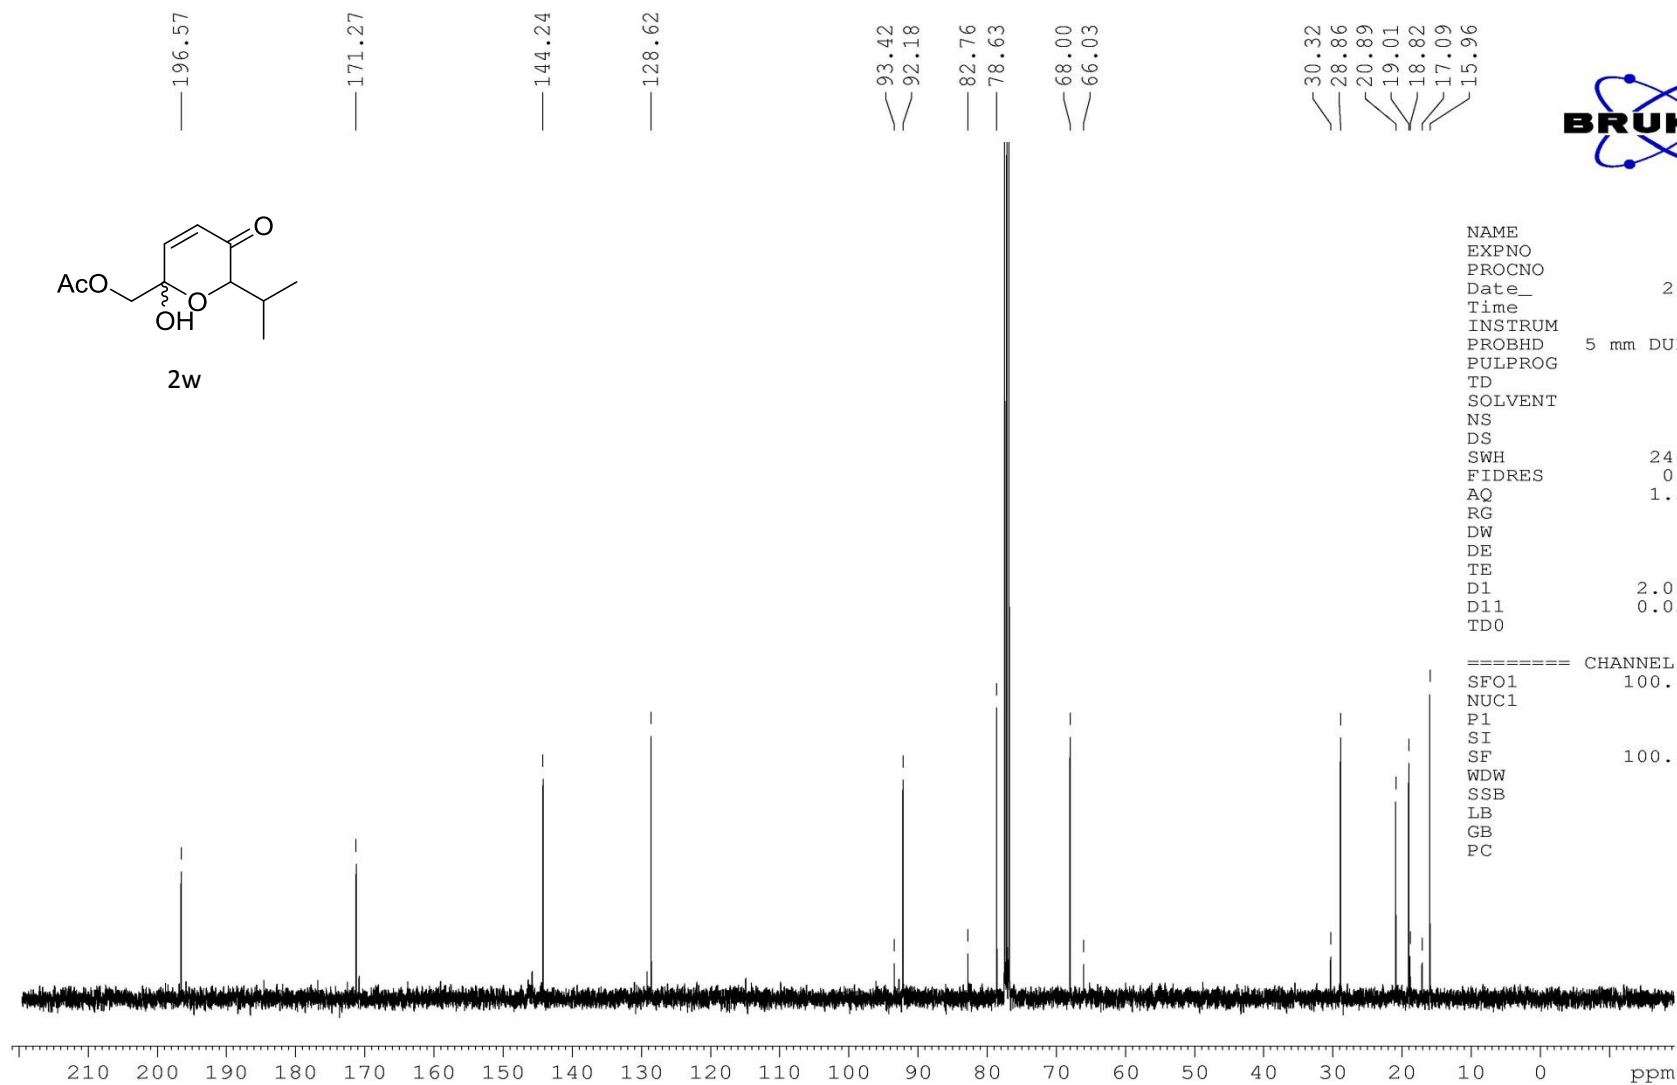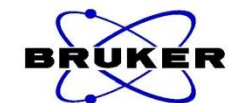

```

NAME          zgp77
EXPNO          9
PROCNO         1
Date_         20180620
Time          15.58
INSTRUM        spect
PROBHD         5 mm DUL 13C-1
PULPROG        zgpg30
TD             65536
SOLVENT        CDCl3
NS             114
DS              0
SWH            24038.461 Hz
FIDRES         0.366798 Hz
AQ             1.3631988 sec
RG             196.92
DW             20.800 usec
DE              6.50 usec
TE             296.1 K
D1             2.00000000 sec
D11            0.03000000 sec
TD0            1
  
```

```

===== CHANNEL f1 =====
SFO1          100.6228298 MHz
NUC1           13C
P1             9.60 usec
SI             32768
SF            100.6127594 MHz
WDW            EM
SSB            0
LB             1.00 Hz
GB             0
PC             1.40
  
```



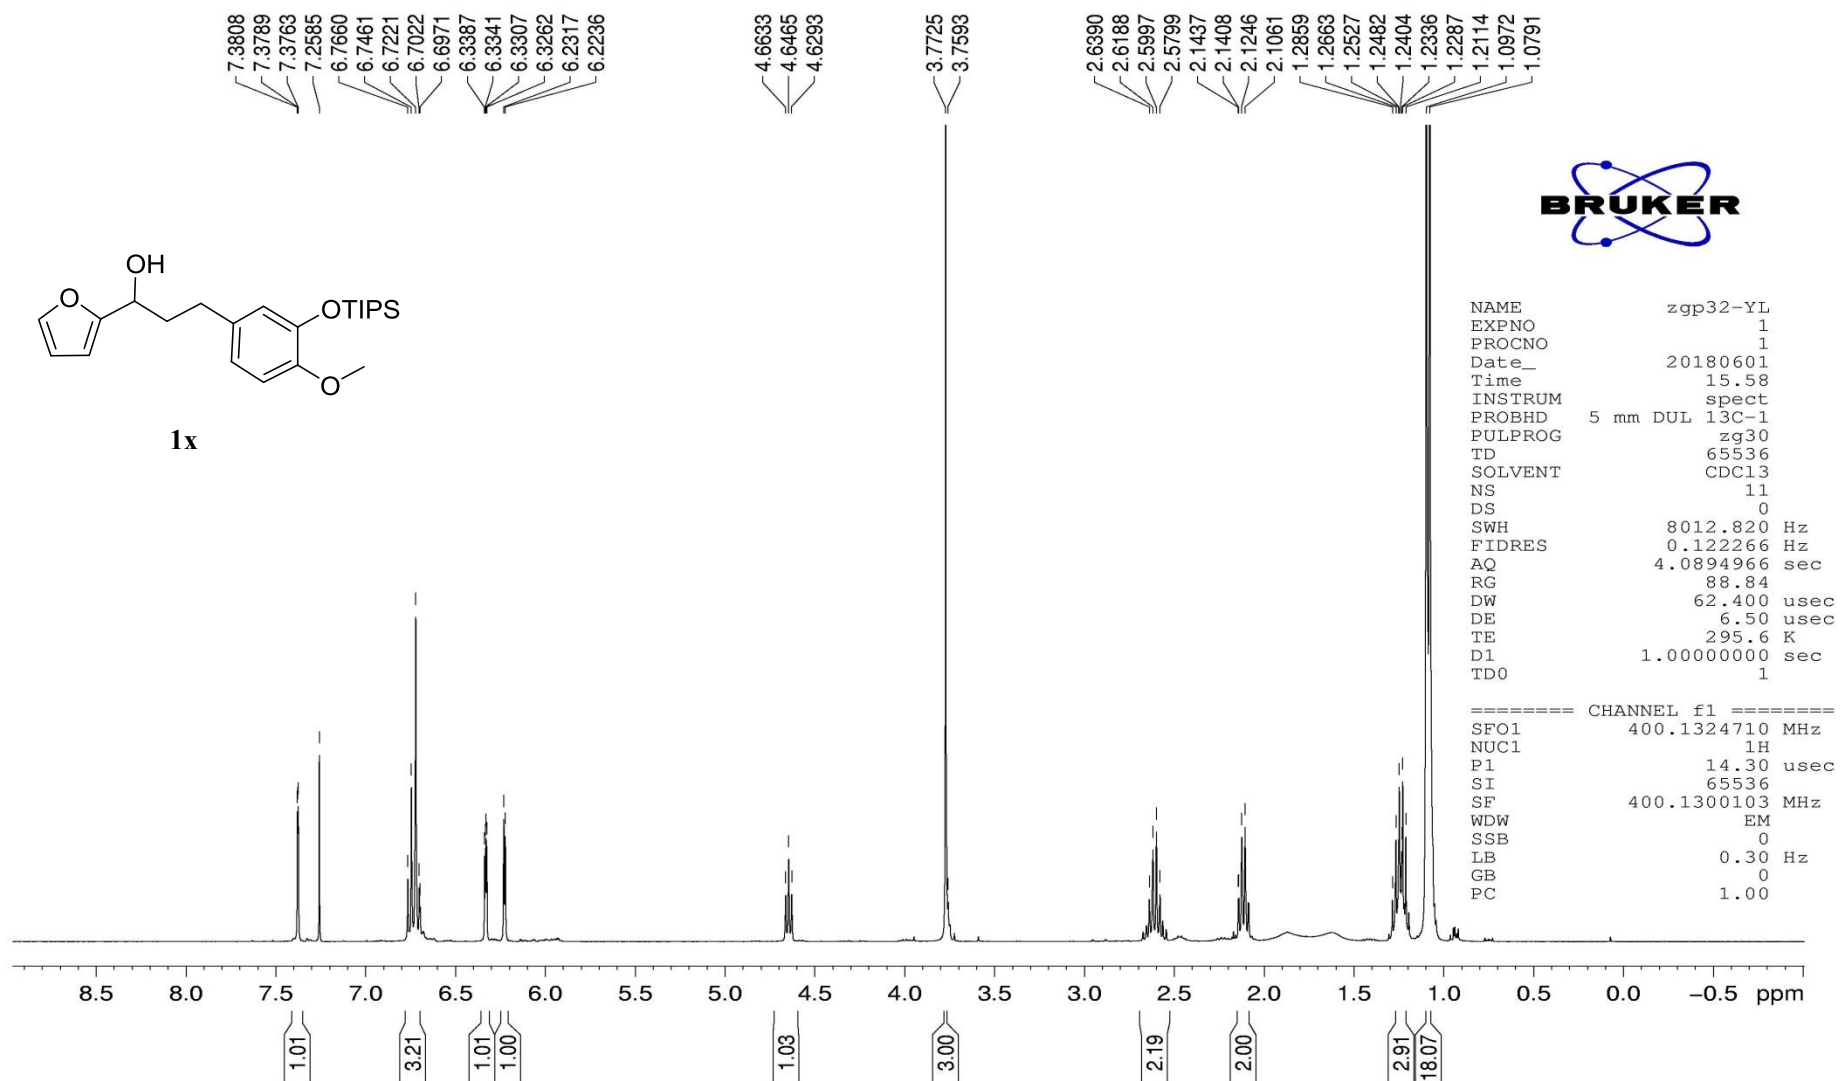

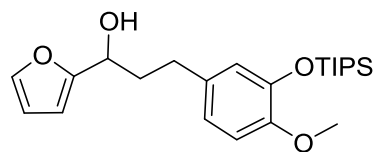

1x

—156.75  
 —149.27  
 —145.51  
 —142.13  
 —134.02  
 —121.18  
 —120.94  
 —112.33  
 —110.27  
 —106.10  
 —67.02  
 —55.74  
 —37.20  
 —31.08  
 —18.07  
 —13.04

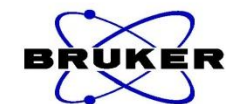

NAME zgp32-YL  
 EXPNO 2  
 PROCNO 1  
 Date\_ 20180601  
 Time 16.00  
 INSTRUM spect  
 PROBD 5 mm DUL 13C-1  
 PULPROG zgpg30  
 TD 65536  
 SOLVENT CDC13  
 NS 99  
 DS 0  
 SWH 24038.461 Hz  
 FIDRES 0.366798 Hz  
 AQ 1.3631988 sec  
 RG 196.92  
 DW 20.800 usec  
 DE 6.50 usec  
 TE 296.0 K  
 D1 2.00000000 sec  
 D11 0.03000000 sec  
 TD0 1

===== CHANNEL f1 =====  
 SFO1 100.6228298 MHz  
 NUC1 13C  
 P1 9.60 usec  
 SI 32768  
 SF 100.6127563 MHz  
 WDW EM  
 SSB 0  
 LB 1.00 Hz  
 GB 0  
 PC 1.40

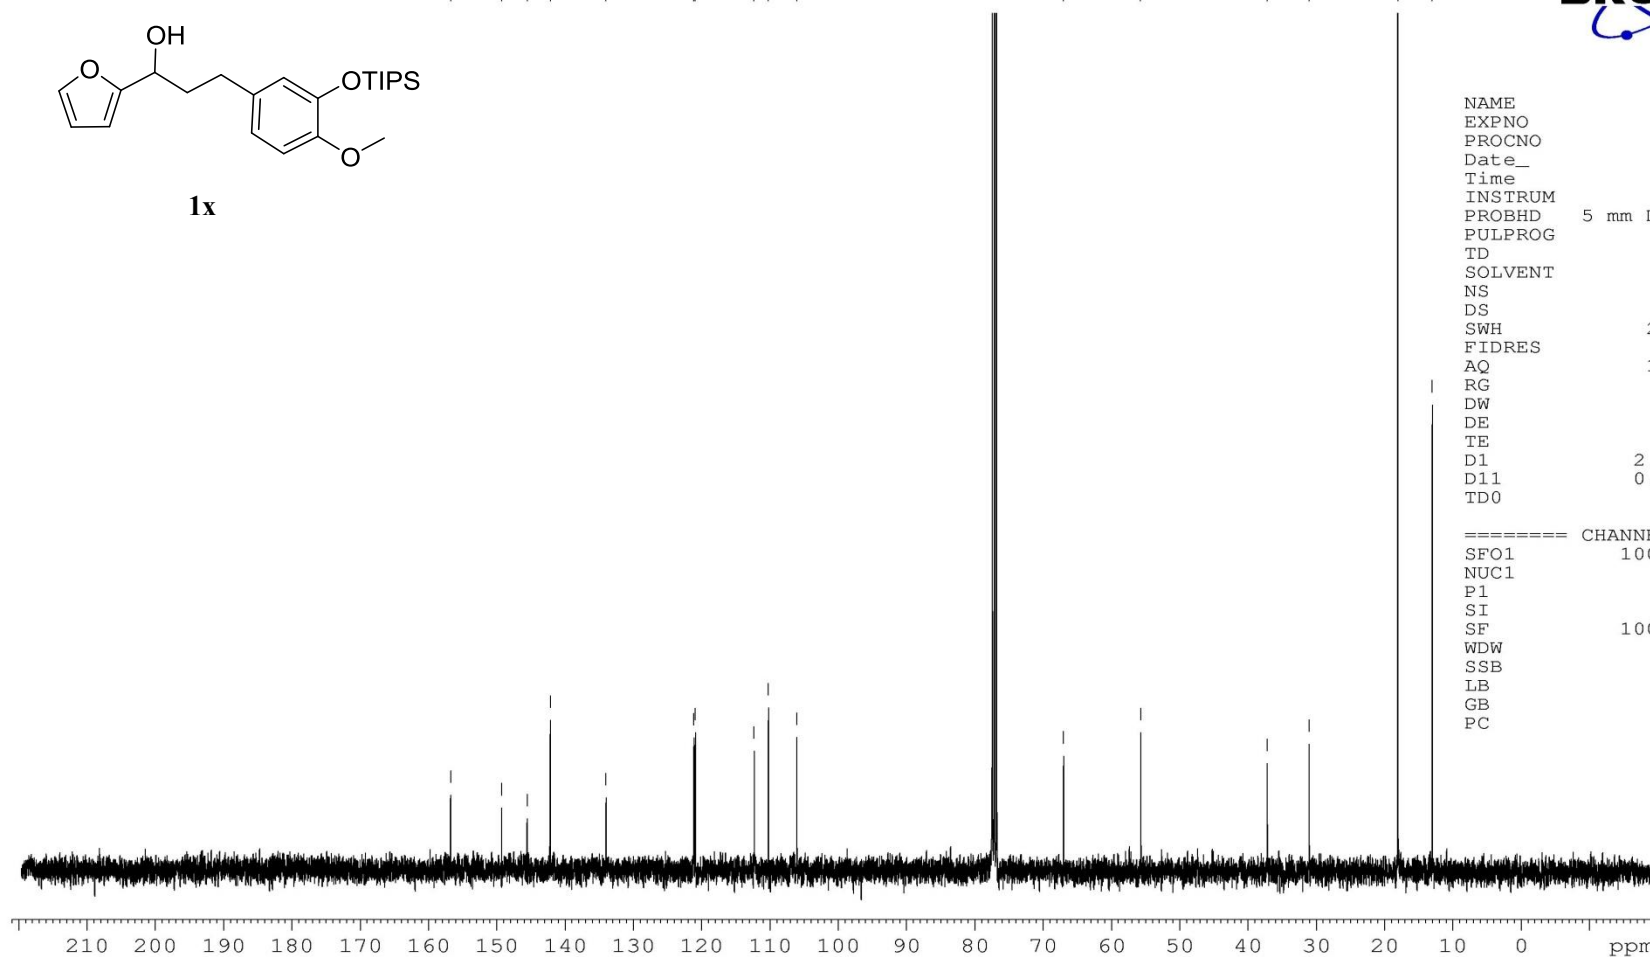

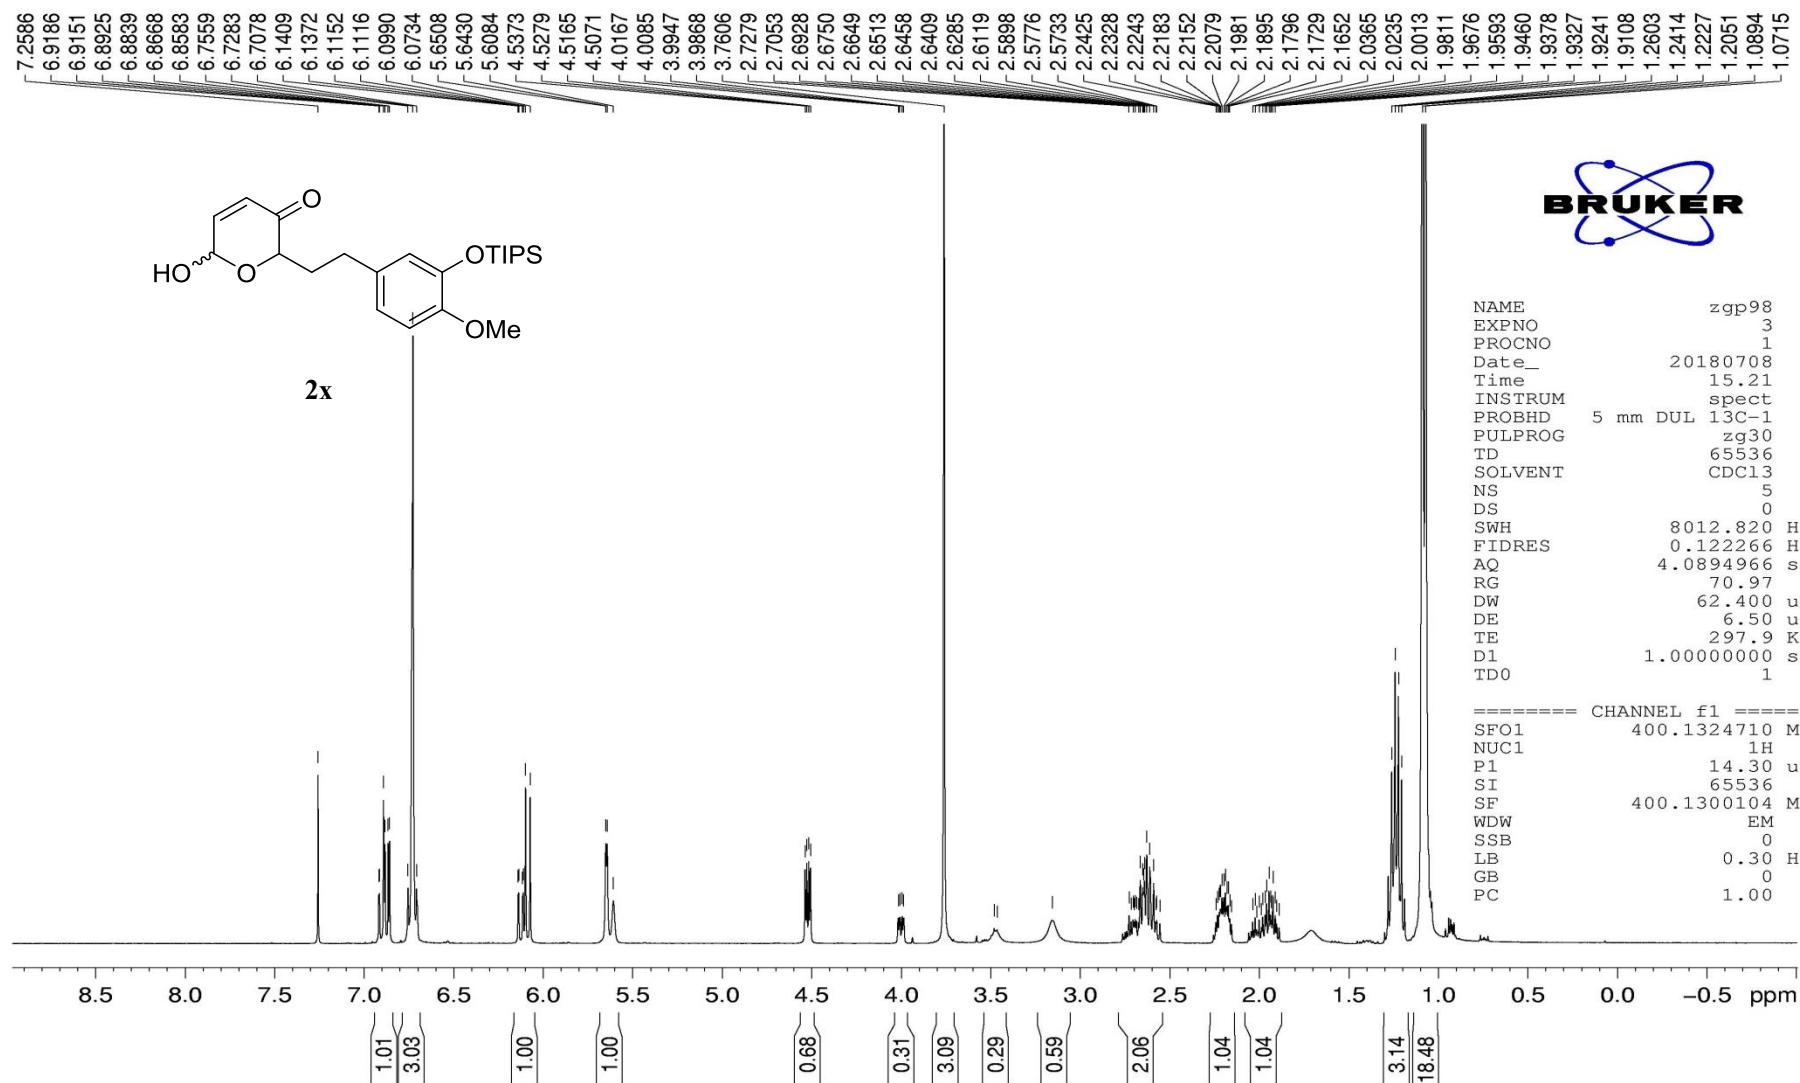

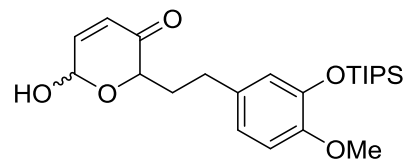

2x

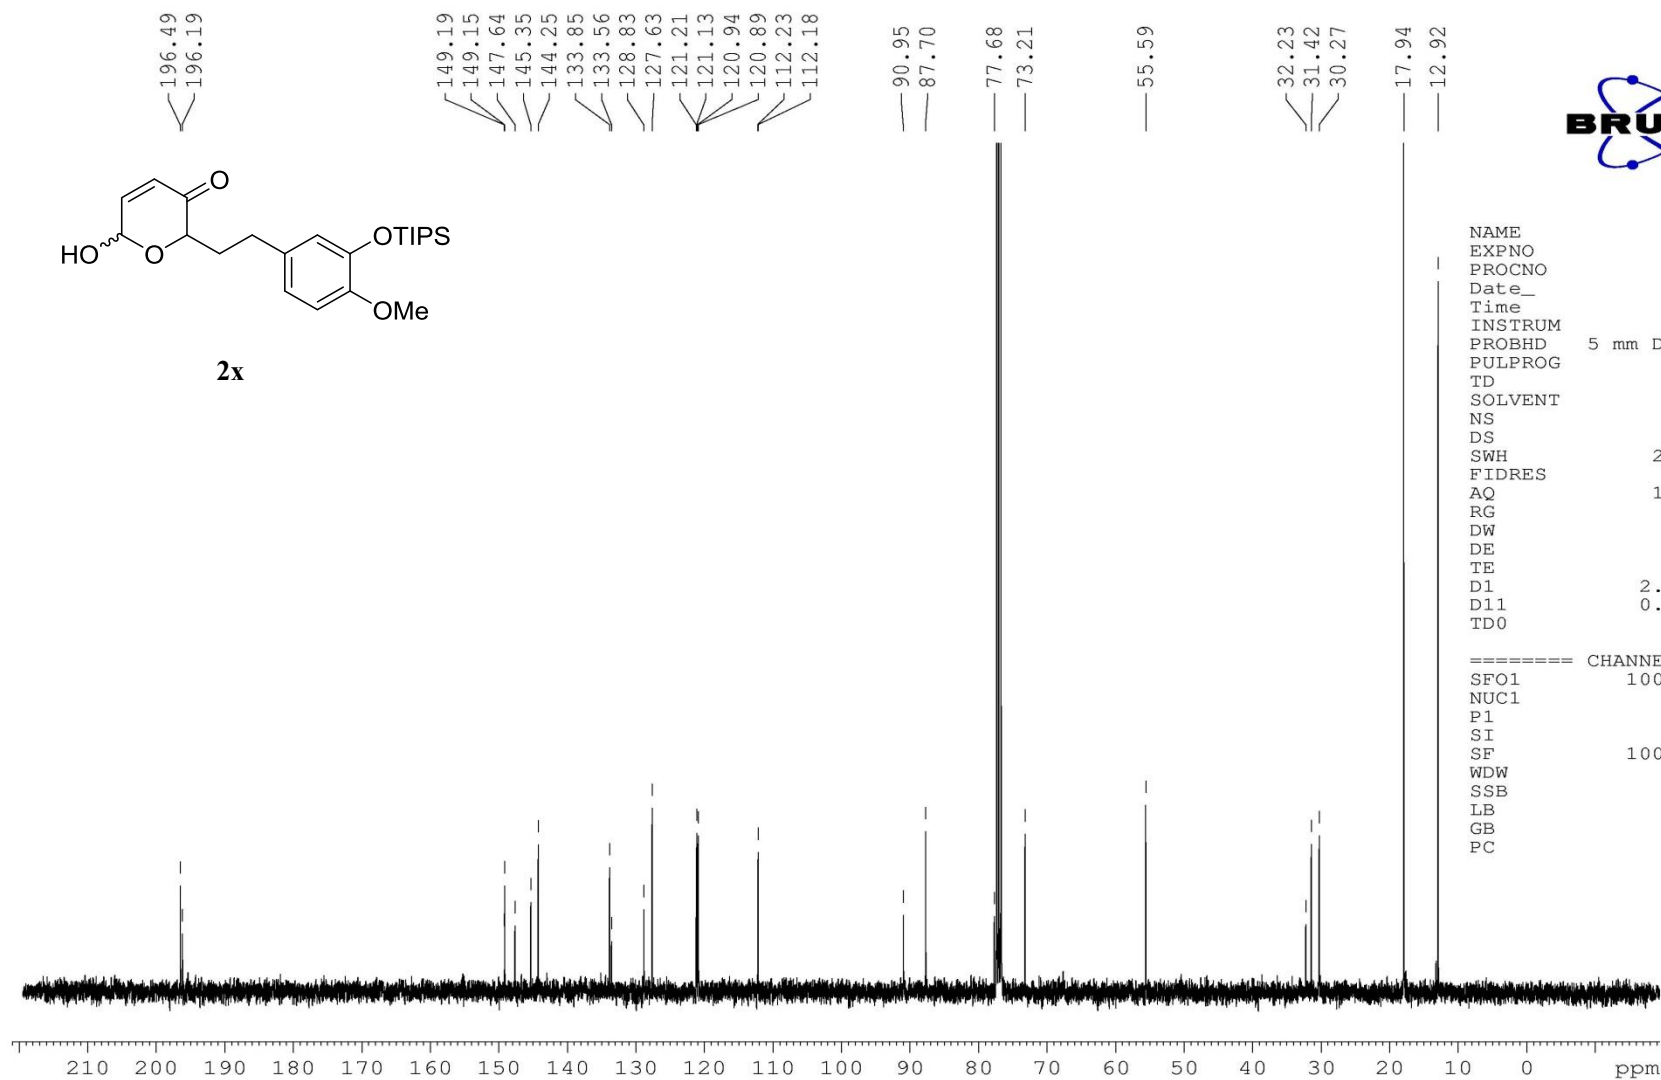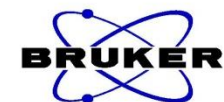

```

NAME                zgp98
EXPNO                4
PROCNO              1
Date_               20180708
Time                15.24
INSTRUM             spect
PROBHD              5 mm DUL 13C-1
PULPROG             zgpg30
TD                  65536
SOLVENT             CDCl3
NS                   183
DS                   0
SWH                 24038.461 Hz
FIDRES              0.366798 Hz
AQ                  1.3631988 sec
RG                   196.92
DW                  20.800 usec
DE                   6.50 usec
TE                   298.4 K
D1                   2.00000000 sec
D11                  0.03000000 sec
TD0                  1
  
```

```

===== CHANNEL f1 =====
SFO1                100.6228298 MHz
NUC1                 13C
P1                   9.60 usec
SI                   32768
SF                  100.6127690 MHz
WDW                  EM
SSB                   0
LB                   1.00 Hz
GB                   0
PC                   1.40
  
```

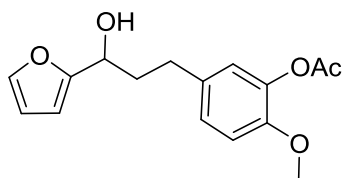

1y

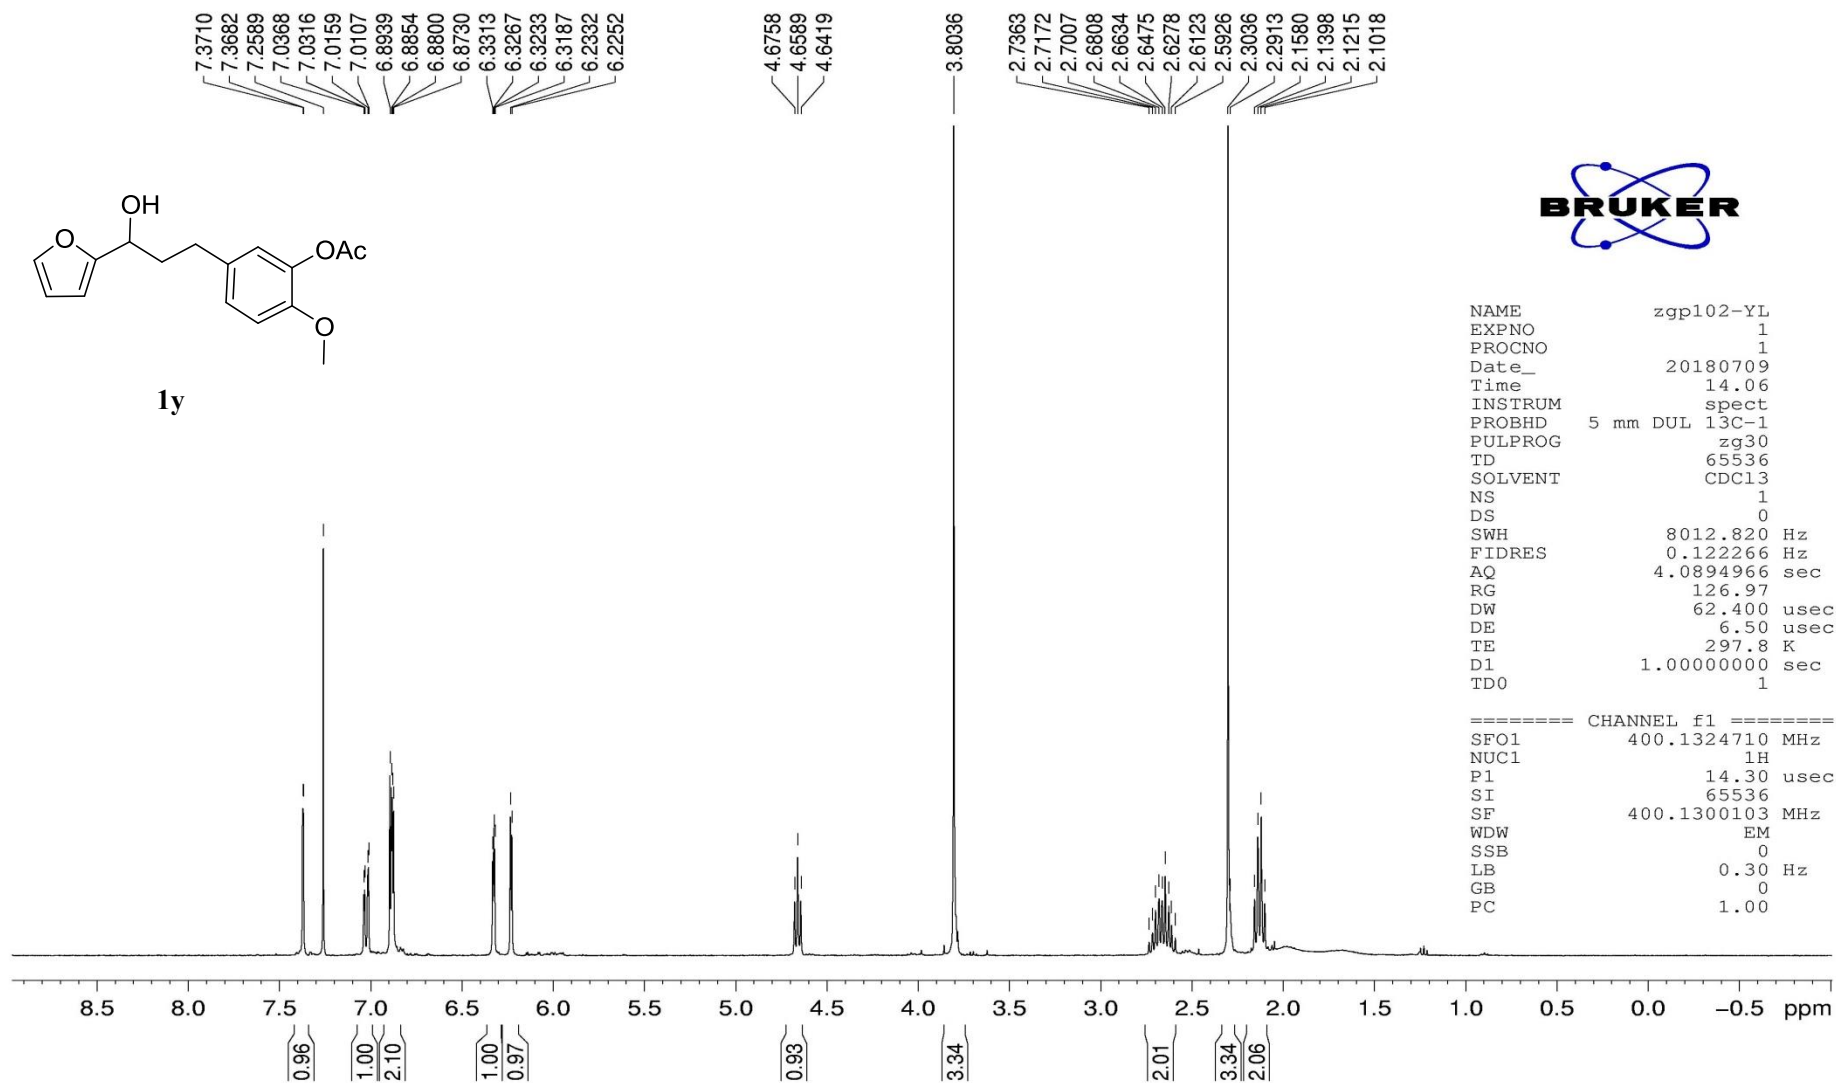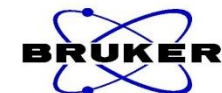

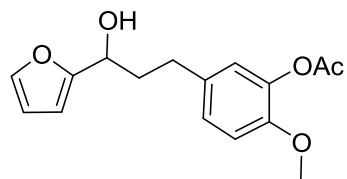

1y

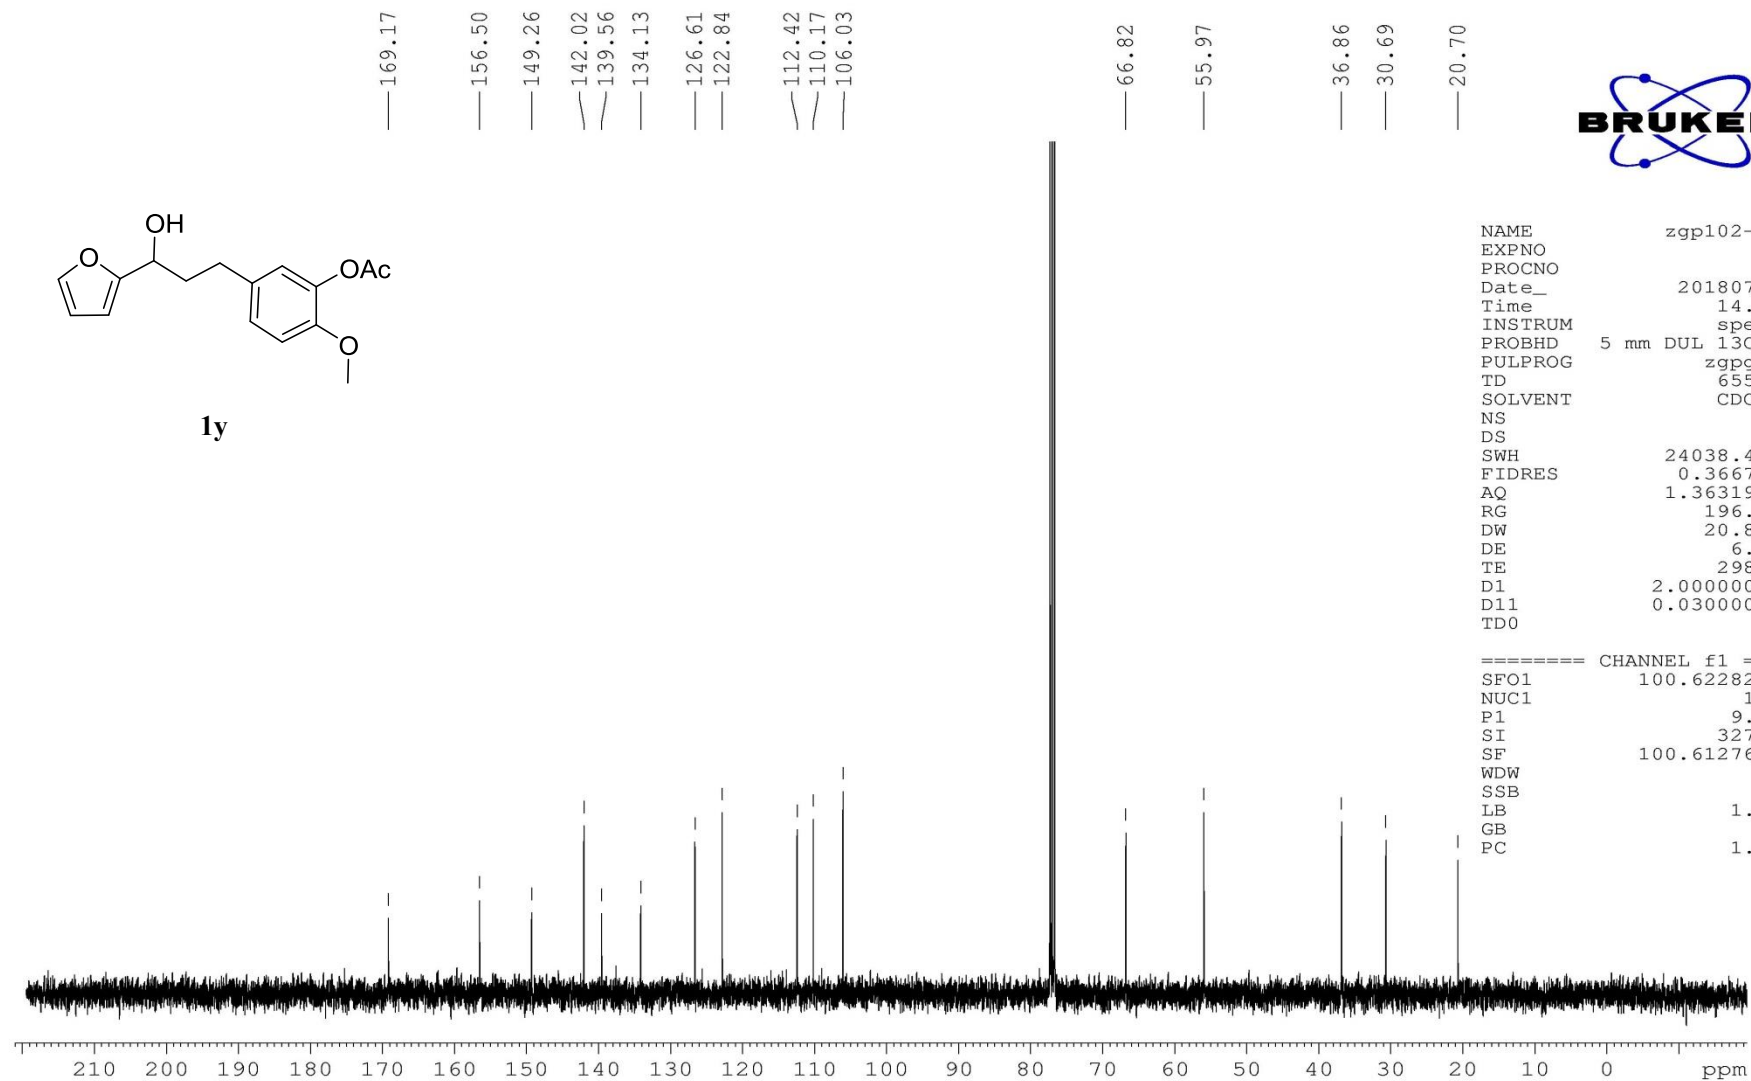

```

NAME          zgp102-YL
EXPNO         2
PROCNO        1
Date_         20180709
Time          14.07
INSTRUM       spect
PROBHD        5 mm DUL 13C-1
PULPROG       zgpg30
TD            65536
SOLVENT       CDCl3
NS            67
DS            0
SWH           24038.461 Hz
FIDRES        0.366798 Hz
AQ            1.3631988 sec
RG            196.92
DW            20.800 usec
DE            6.50 usec
TE            298.1 K
D1            2.00000000 sec
D11           0.03000000 sec
TD0           1
  
```

```

===== CHANNEL f1 =====
SFO1          100.6228298 MHz
NUC1          13C
P1            9.60 usec
SI            32768
SF            100.6127690 MHz
WDW           EM
SSB           0
LB            1.00 Hz
GB            0
PC            1.40
  
```

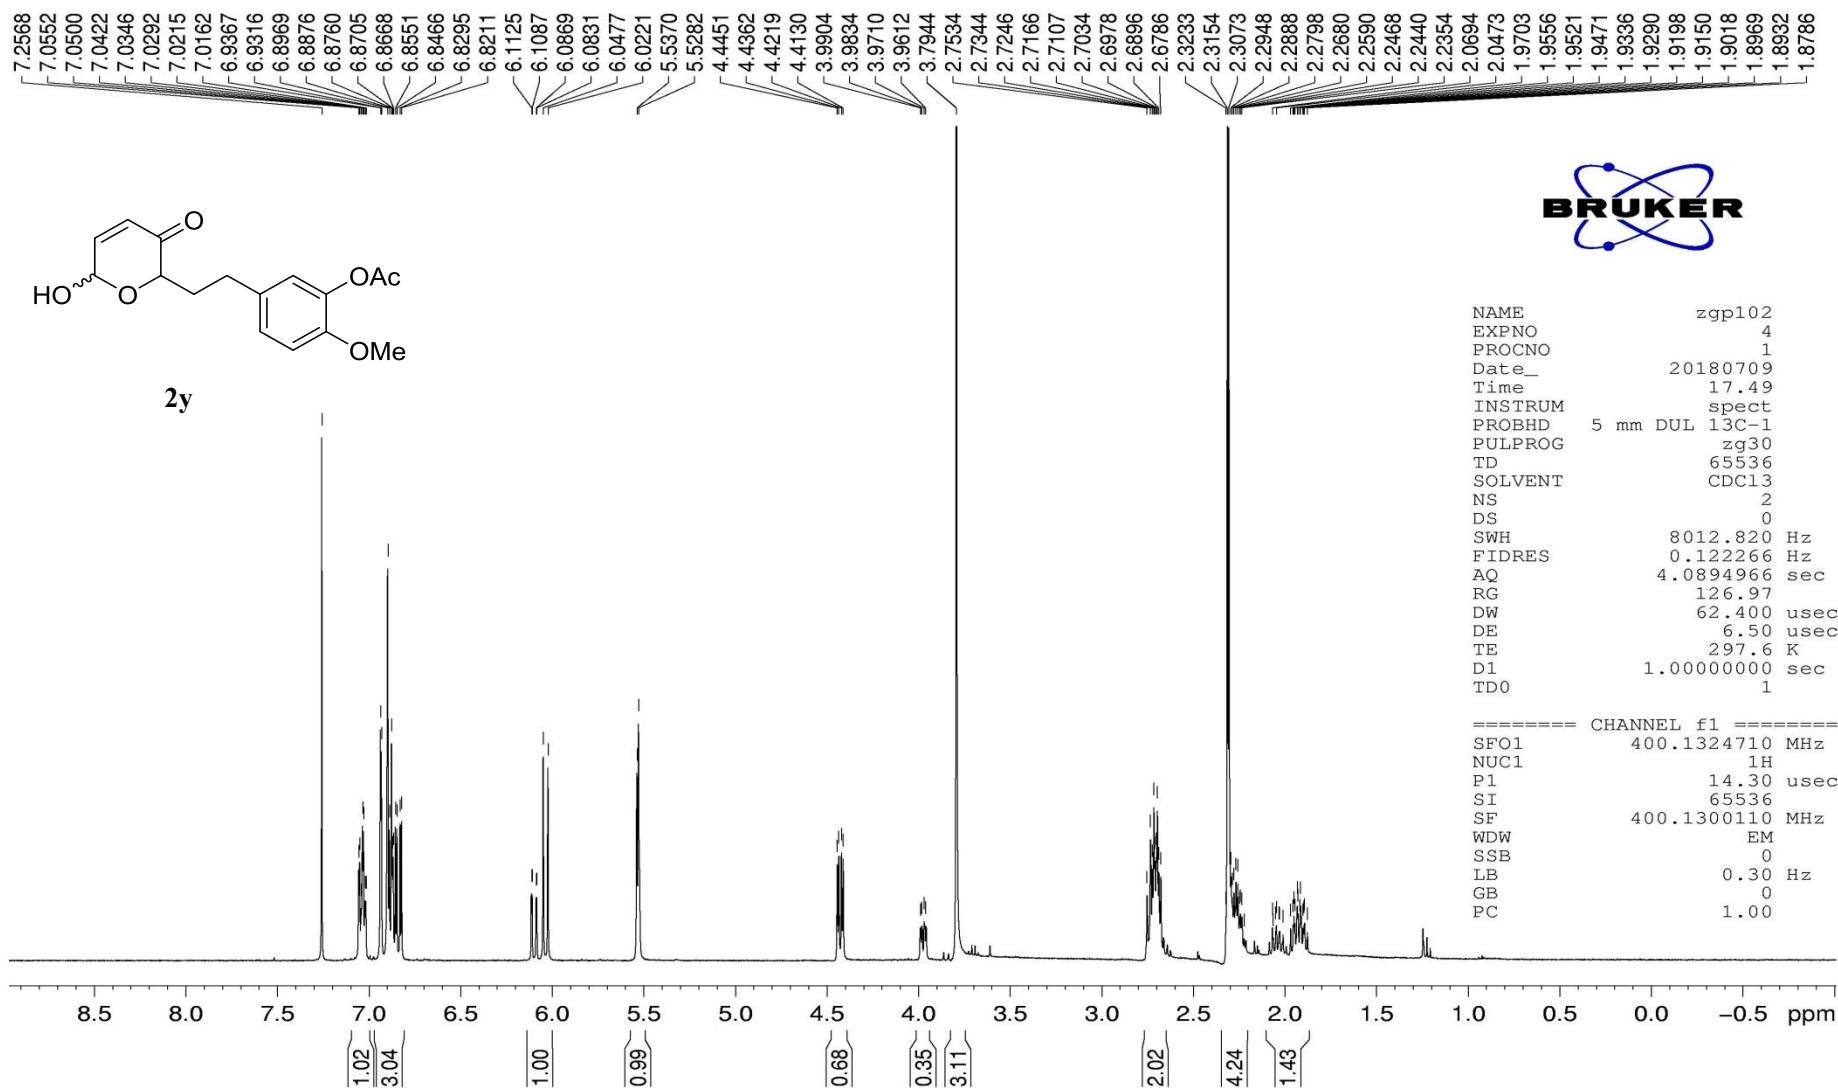



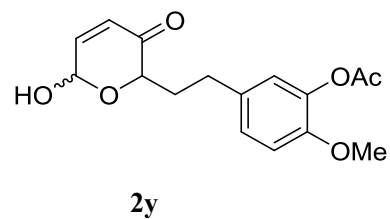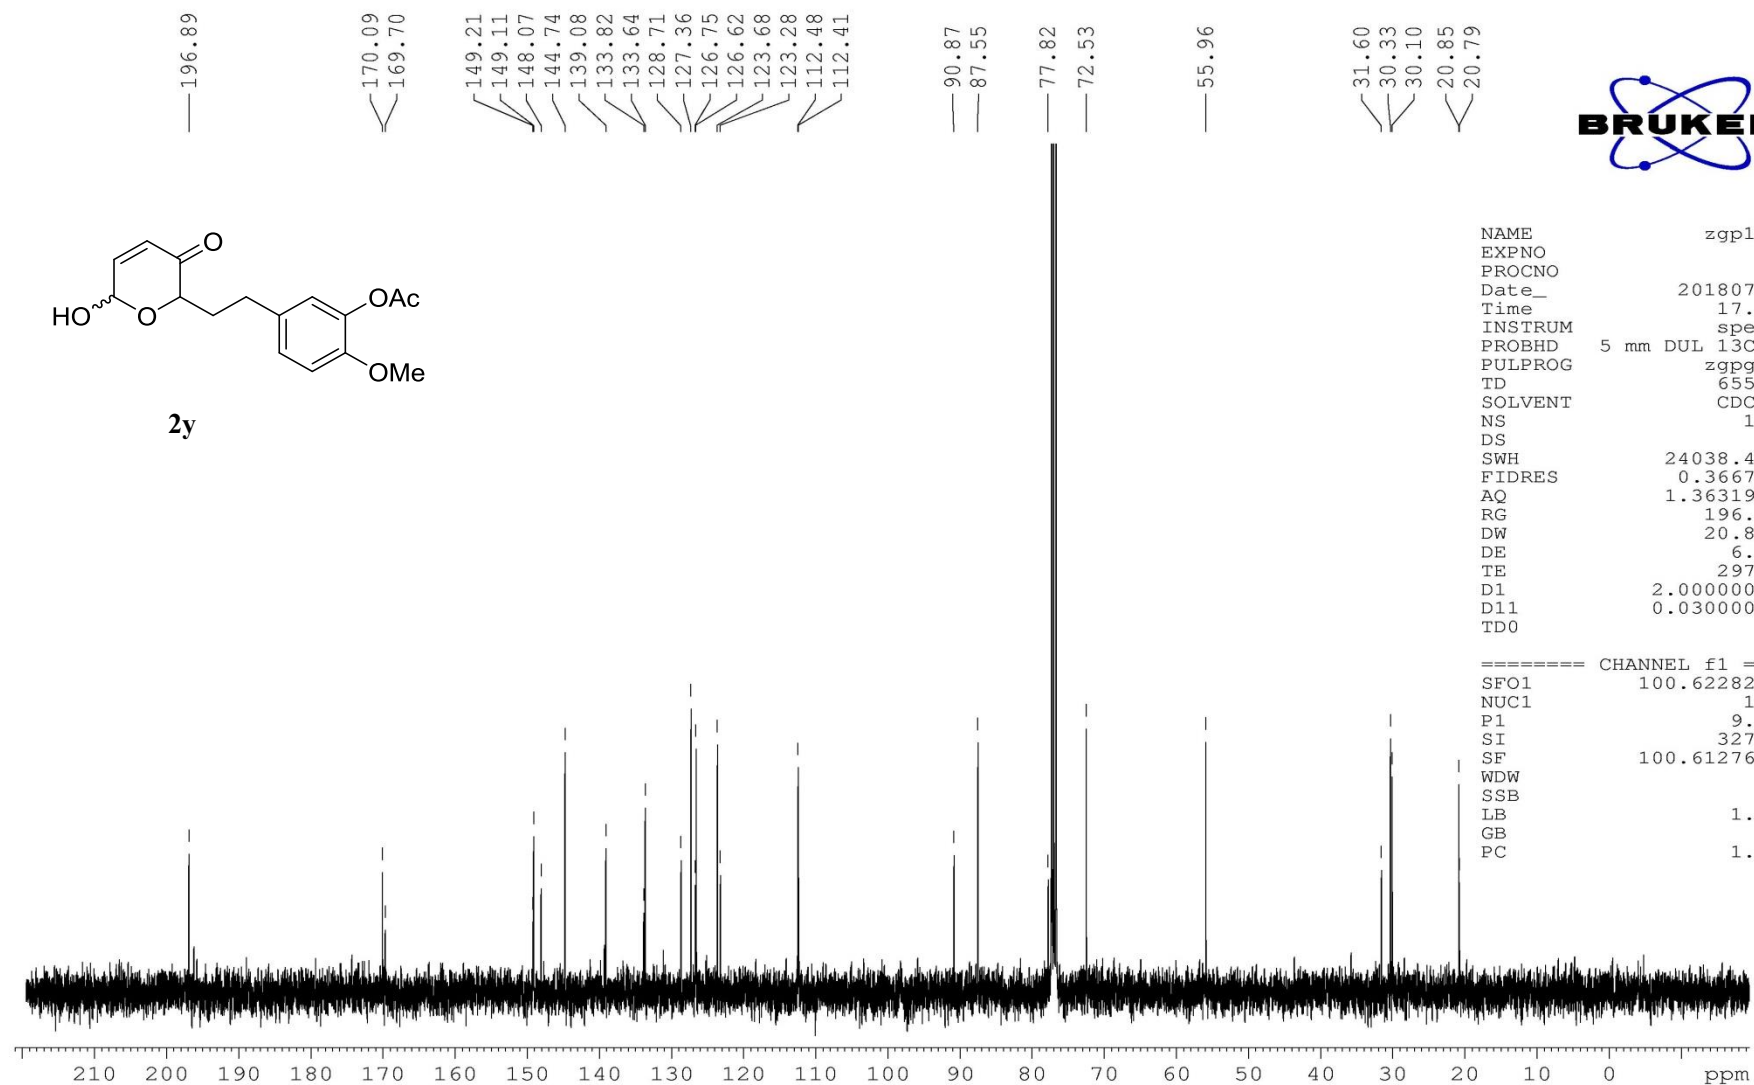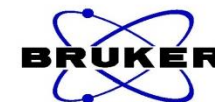



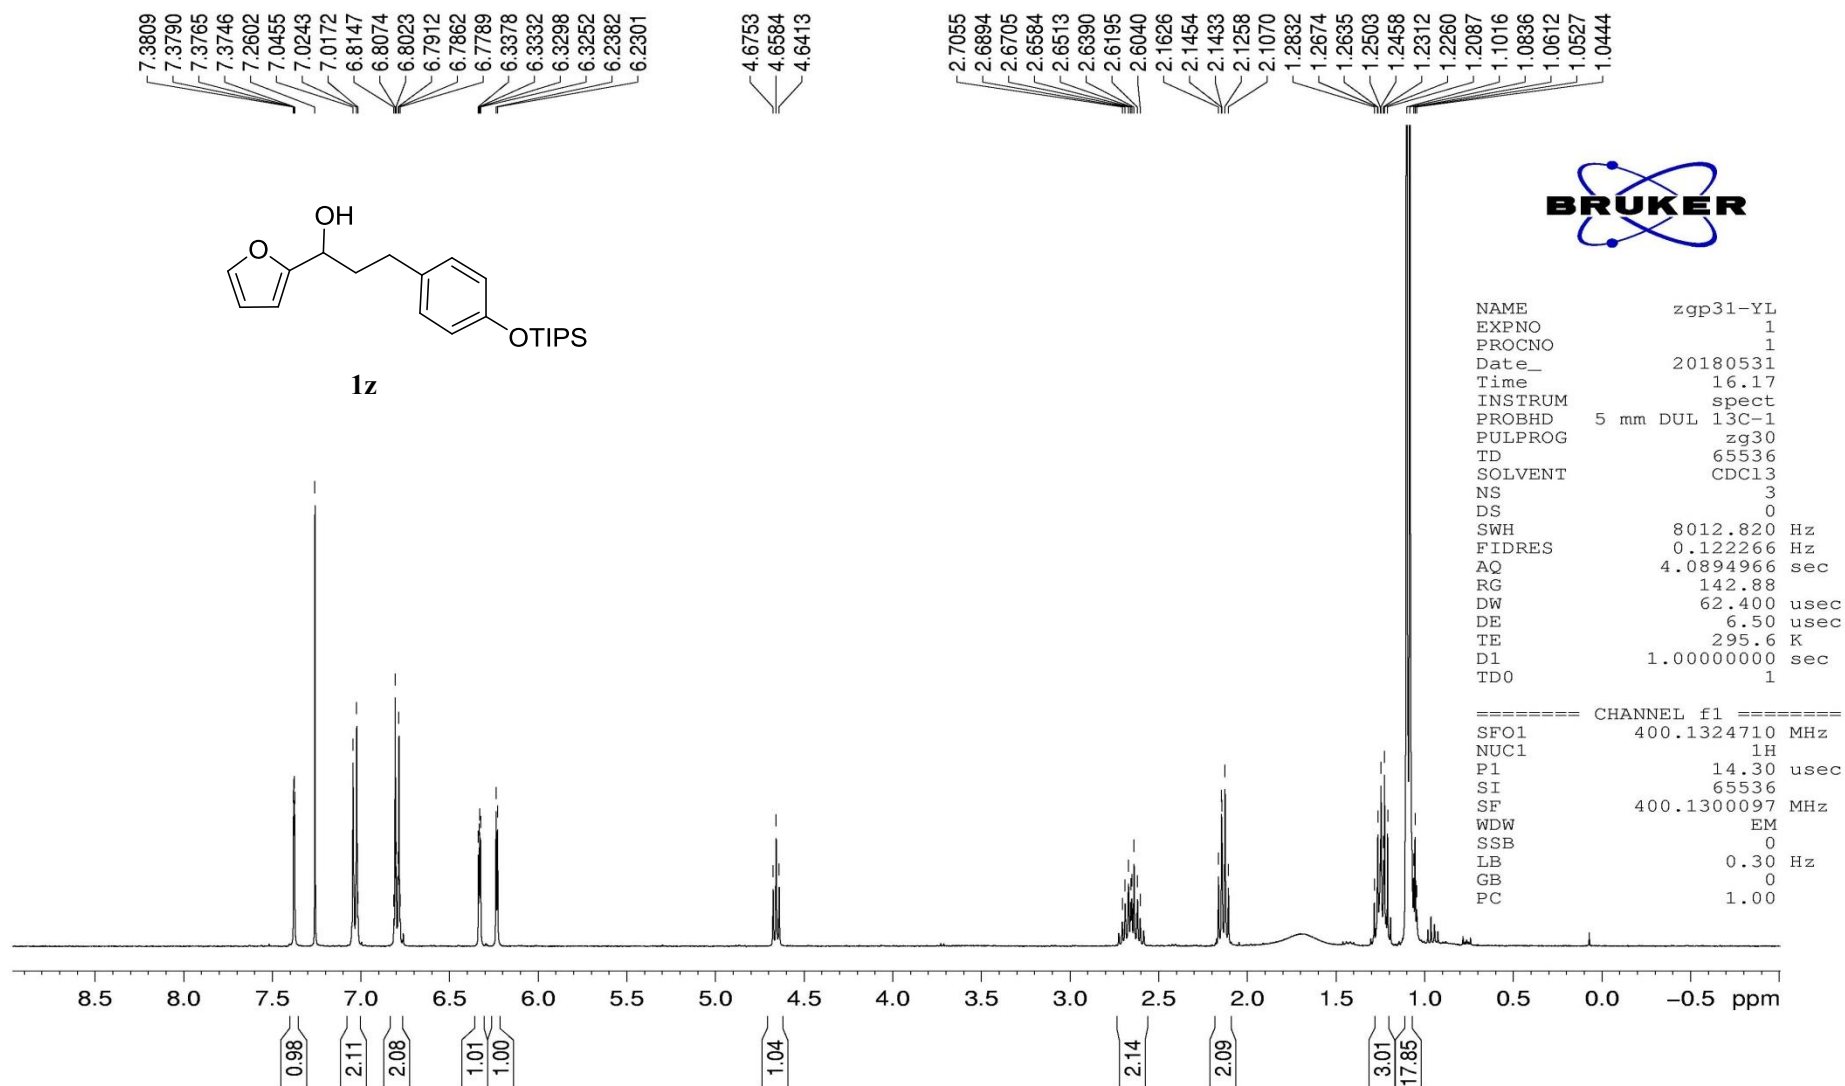

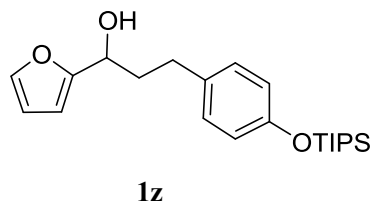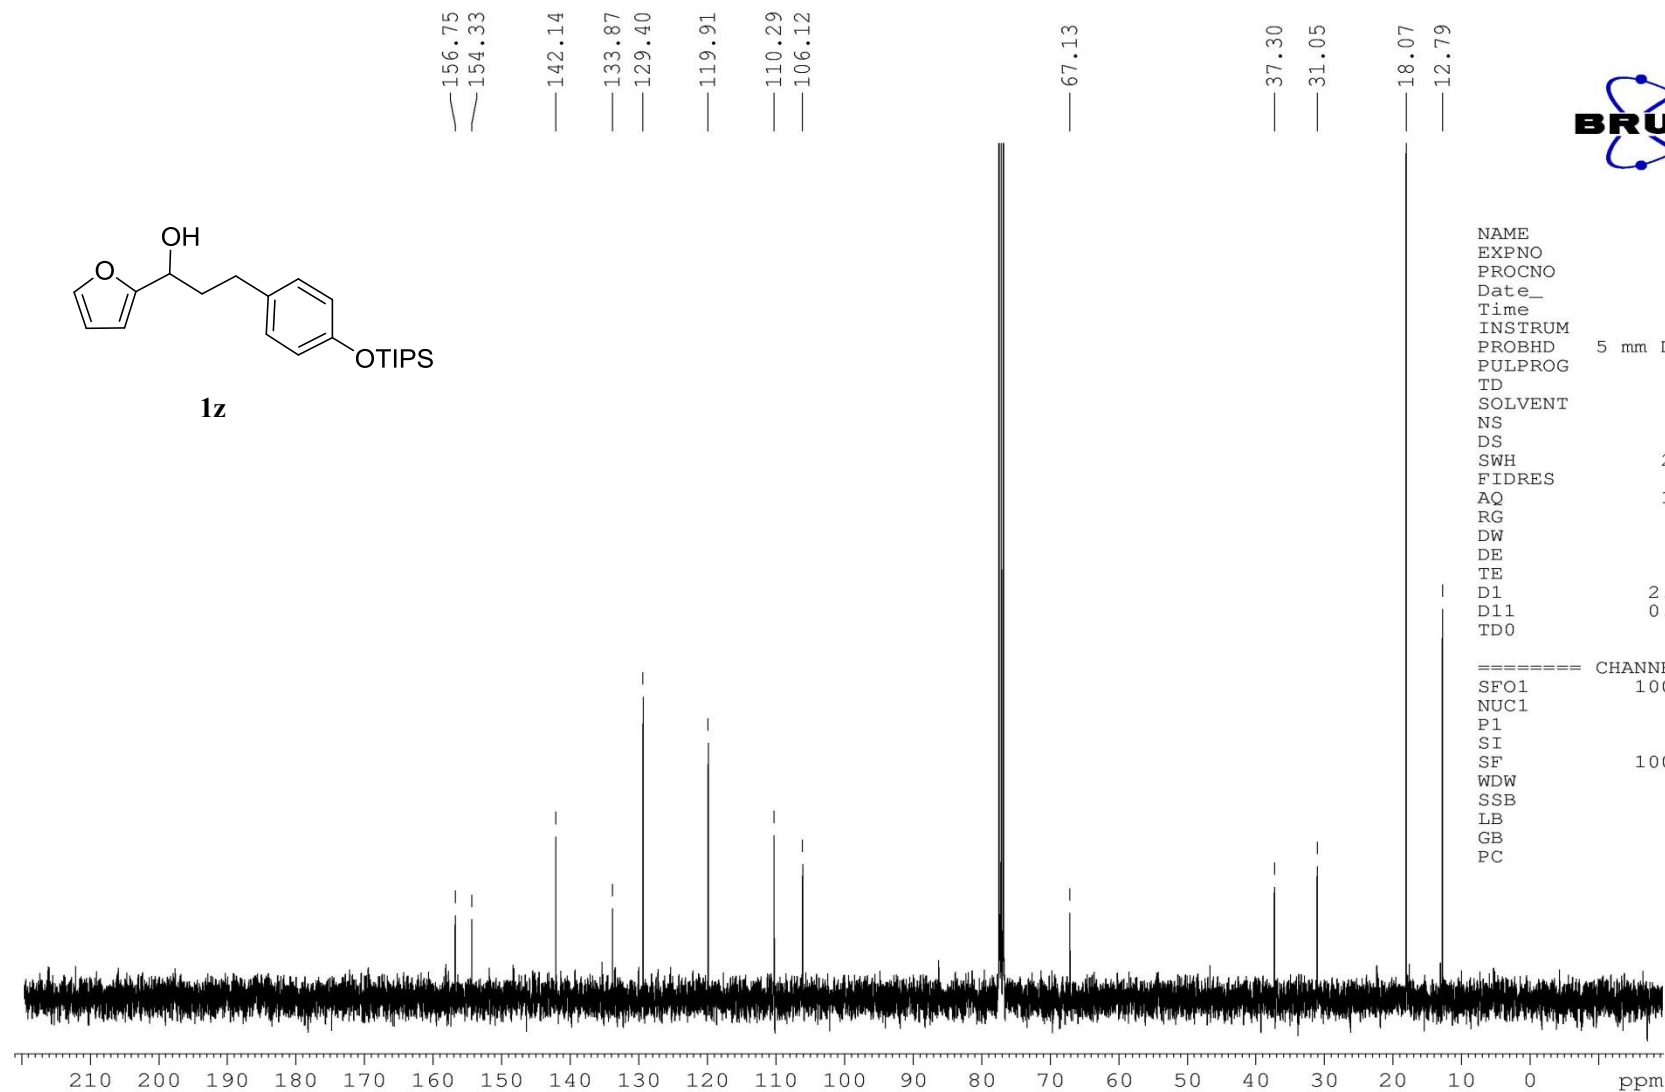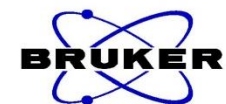

```

NAME          zgp31-YL
EXPNO          2
PROCNO         1
Date_          20180531
Time           17.23
INSTRUM        spect
PROBHD         5 mm DUL 13C-1
PULPROG        zgpg30
TD             65536
SOLVENT        CDCl3
NS             145
DS             0
SWH            24038.461 Hz
FIDRES         0.366798 Hz
AQ             1.3631988 sec
RG             196.92
DW             20.800 usec
DE             6.50 usec
TE             295.8 K
D1             2.00000000 sec
D11            0.03000000 sec
TD0            1
  
```

```

===== CHANNEL f1 =====
SFO1          100.6228298 MHz
NUC1           13C
P1             9.60 usec
SI            32768
SF            100.6127552 MHz
WDW            EM
SSB            0
LB             1.00 Hz
GB             0
PC             1.40
  
```

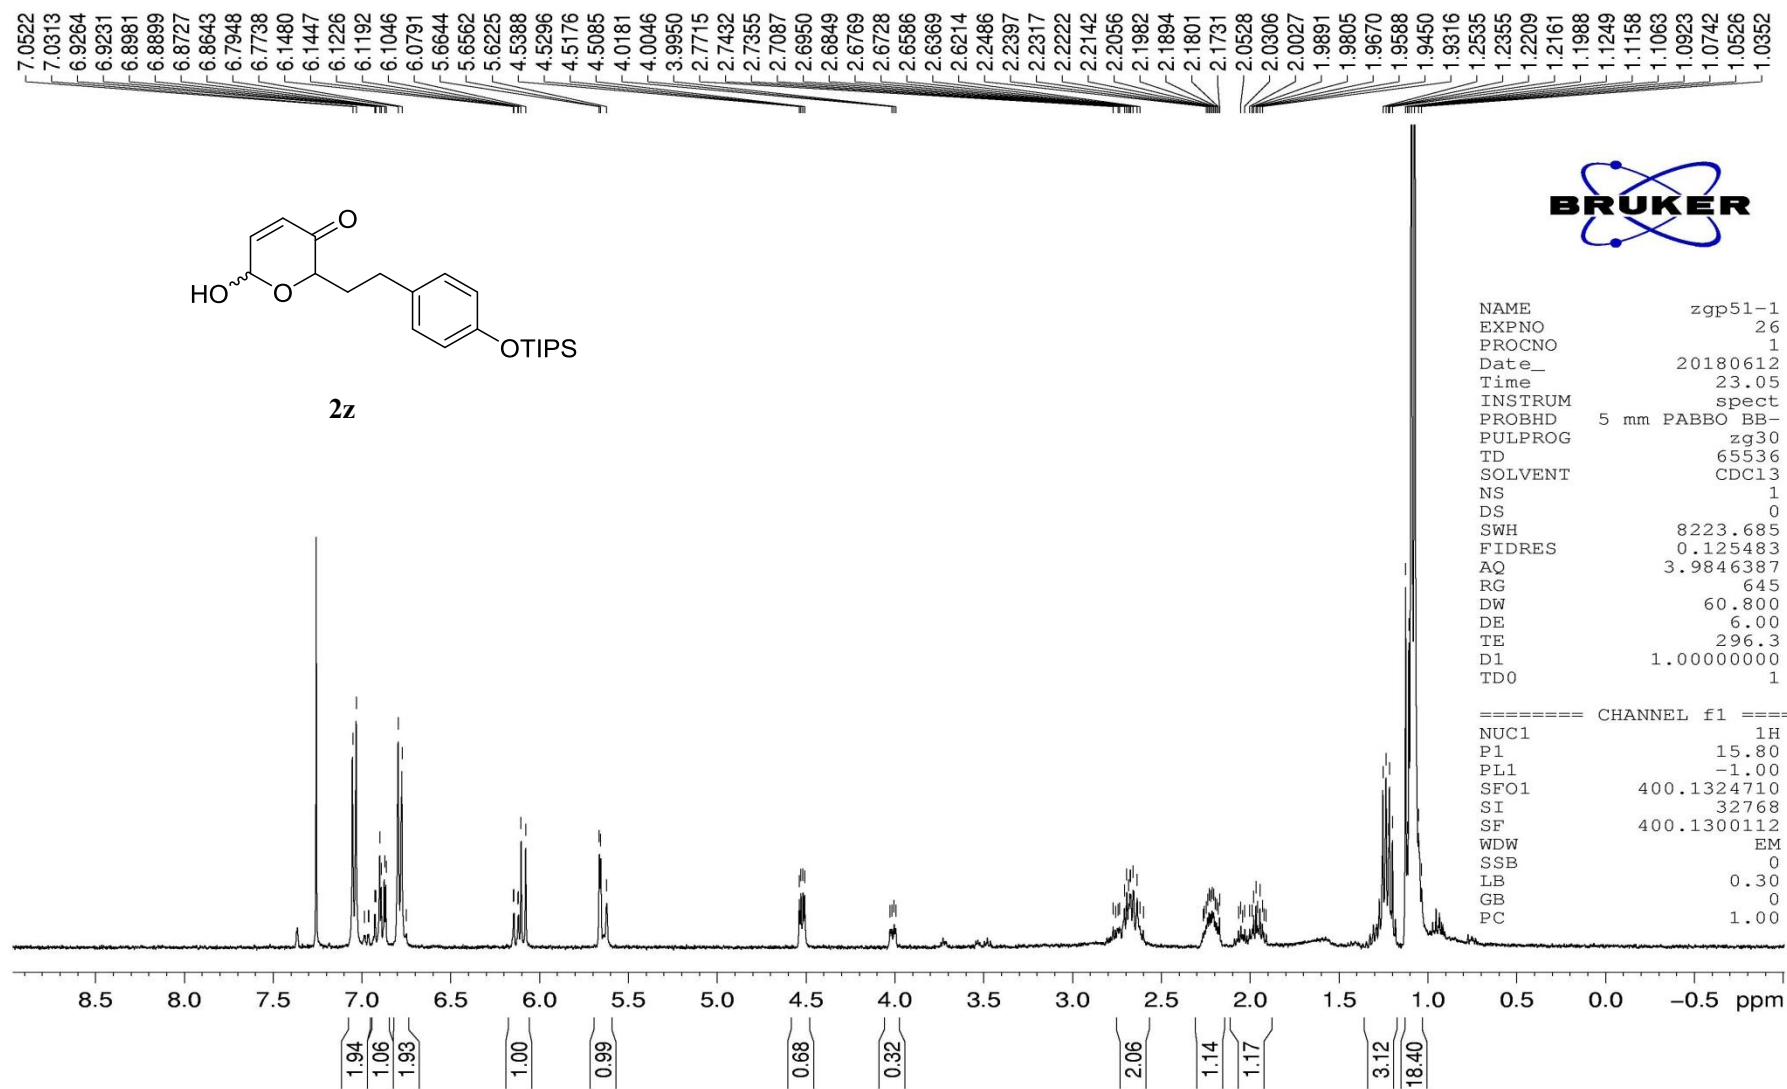

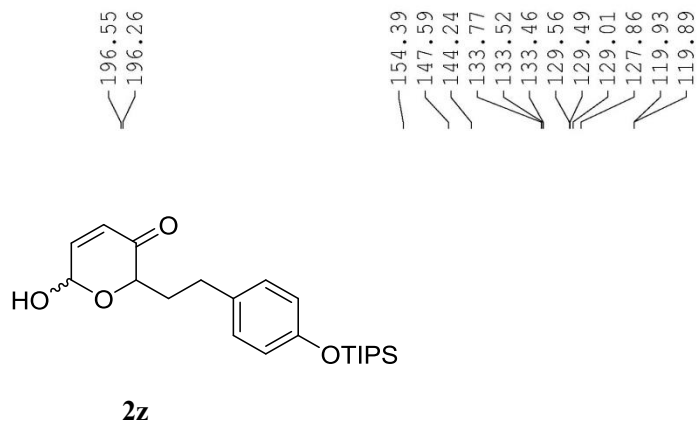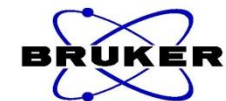

```

NAME          zgp51-1
EXPNO         27
PROCNO        1
Date_         20180612
Time          23.08
INSTRUM       spect
PROBHD        5 mm PABBO BB-
PULPROG       zgpg30
TD            65536
SOLVENT       CDCl3
NS            1183
DS            0
SWH           24038.461 Hz
FIDRES        0.366798 Hz
AQ            1.3631988 sec
RG            80.6
DW            20.800 usec
DE            6.00 usec
TE            296.5 K
D1            2.00000000 sec
d11           0.03000000 sec
DELTA         1.89999998 sec
TD0           1

```

```

===== CHANNEL f1 =====
NUC1          13C
P1            8.60 usec
PL1           -3.00 dB
SFO1          100.6228298 MHz

```

```

===== CHANNEL f2 =====
CPDPRG2       waltz16
NUC2          1H
PCPD2         80.00 usec
PL12          14.39 dB
PL13          18.00 dB
PL2           -1.00 dB
SFO2          400.1316005 MHz
SI            32768
SF            100.6127545 MHz
WDW           EM
SSB           0
LB            1.00 Hz
GB            0
PC            1.40

```

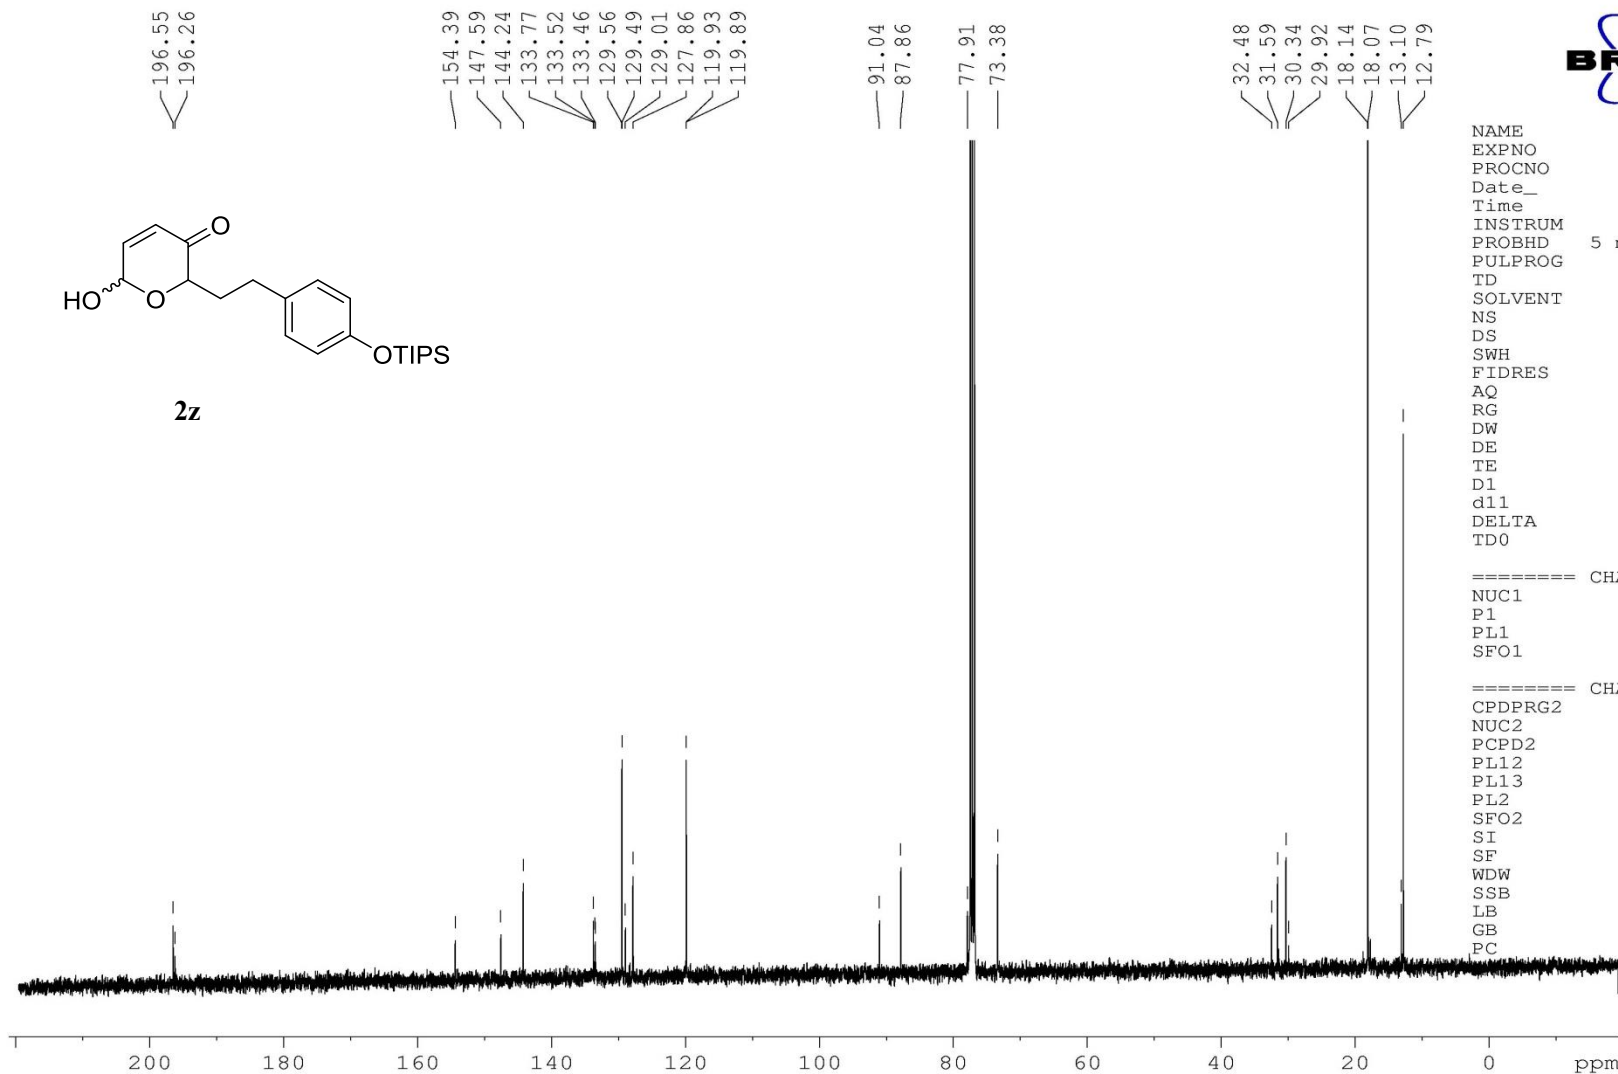

7.4342  
7.4094  
7.4059  
7.4037  
7.2701  
7.2407  
7.2333  
7.2120  
7.1107  
7.1063  
7.0940  
7.0894  
6.3965  
6.3926  
6.3791  
6.3709  
6.3663  
6.3571

4.5477  
4.5330  
4.1525  
4.1390  
4.1324  
4.1269  
4.1188  
4.1063

2.8048  
2.7932  
2.7695  
2.7583  
2.7399  
2.7195  
2.7051  
2.6846

1.5602

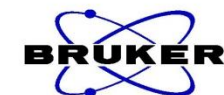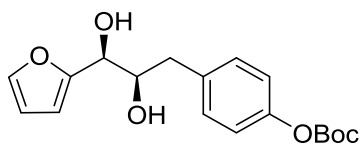

**1aa**

NAME zgp106  
EXPNO 4  
PROCNO 1  
Date\_ 20180711  
Time 12.56  
INSTRUM spect  
PROBHD 5 mm PABBO BB-  
PULPROG zg30  
TD 65536  
SOLVENT CDCl3  
NS 3  
DS 0  
SWH 8223.685 Hz  
FIDRES 0.125483 Hz  
AQ 3.9846387 sec  
RG 322  
DW 60.800 usec  
DE 6.00 usec  
TE 294.8 K  
D1 1.00000000 sec  
TD0 1

===== CHANNEL f1 =====  
NUC1 1H  
P1 15.80 usec  
PL1 -1.00 dB  
SFO1 400.1324710 MHz  
SI 32768  
SF 400.1300054 MHz  
WDW EM  
SSB 0  
LB 0.30 Hz  
GB 0  
PC 1.00

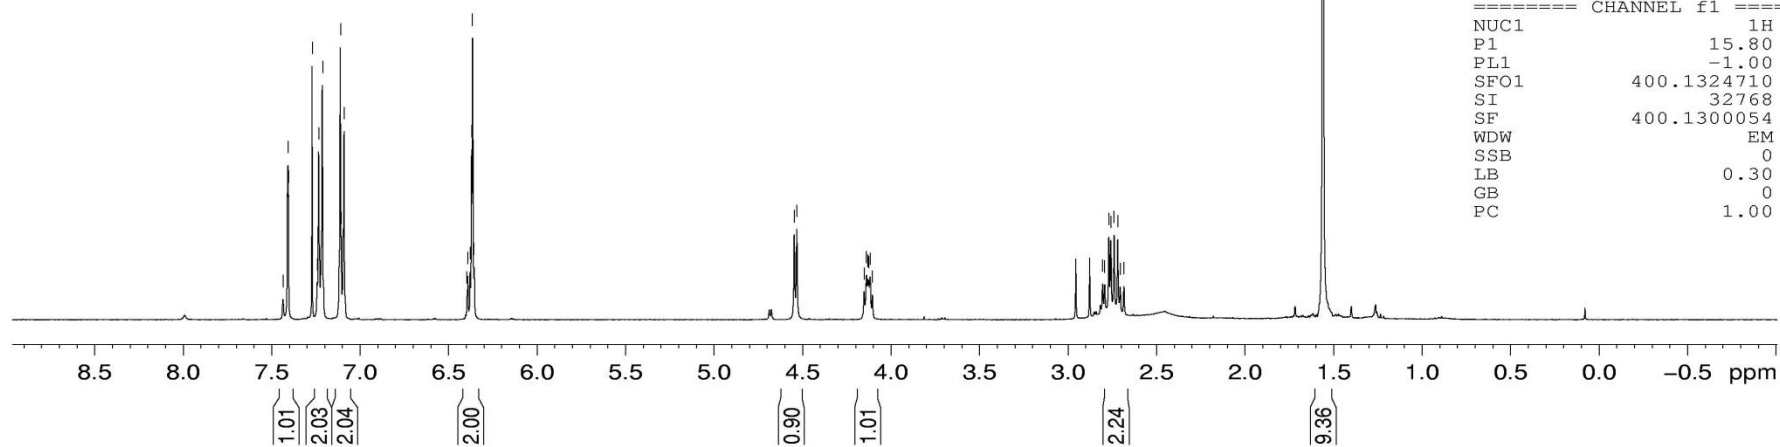

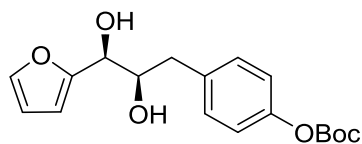

**1aa**

153.15  
151.42  
149.10  
141.79  
134.75  
129.76  
120.68  
109.79  
107.37  
82.95  
73.54  
69.49  
38.08  
27.07

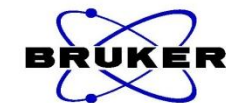

```

NAME                zgp106
EXPNO                5
PROCNO              1
Date_               20180711
Time                12.59
INSTRUM             spect
PROBHD              5 mm PABBO BB-
PULPROG             zgpg30
TD                  65536
SOLVENT             CDCl3
NS                   41
DS                   0
SWH                 24038.461 Hz
FIDRES              0.366798 Hz
AQ                  1.3631988 sec
RG                   114
DW                  20.800 usec
DE                   6.00 usec
TE                  295.3 K
D1                  2.00000000 sec
d11                  0.03000000 sec
DELTA               1.89999998 sec
TD0                  1
  
```

```

===== CHANNEL f1 =====
NUC1                 13C
P1                   8.60 usec
PL1                  -3.00 dB
SFO1                 100.6228298 MHz
  
```

```

===== CHANNEL f2 =====
CPDPRG2             waltz16
NUC2                 1H
PCPD2                80.00 usec
PL12                 14.39 dB
PL13                 18.00 dB
PL2                  -1.00 dB
SFO2                 400.1316005 MHz
SI                   32768
SF                   100.6128330 MHz
WDW                  EM
SSB                   0
LB                   1.00 Hz
GB                   0
PC                   1.40
  
```

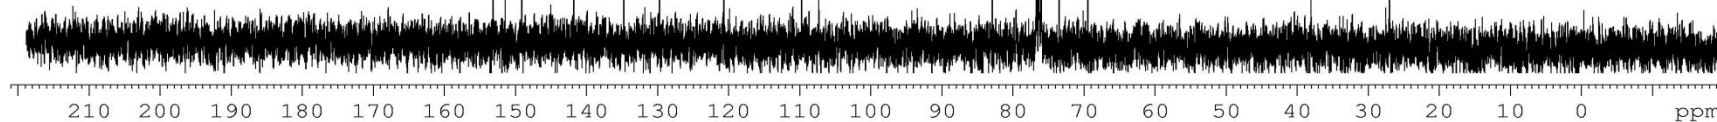

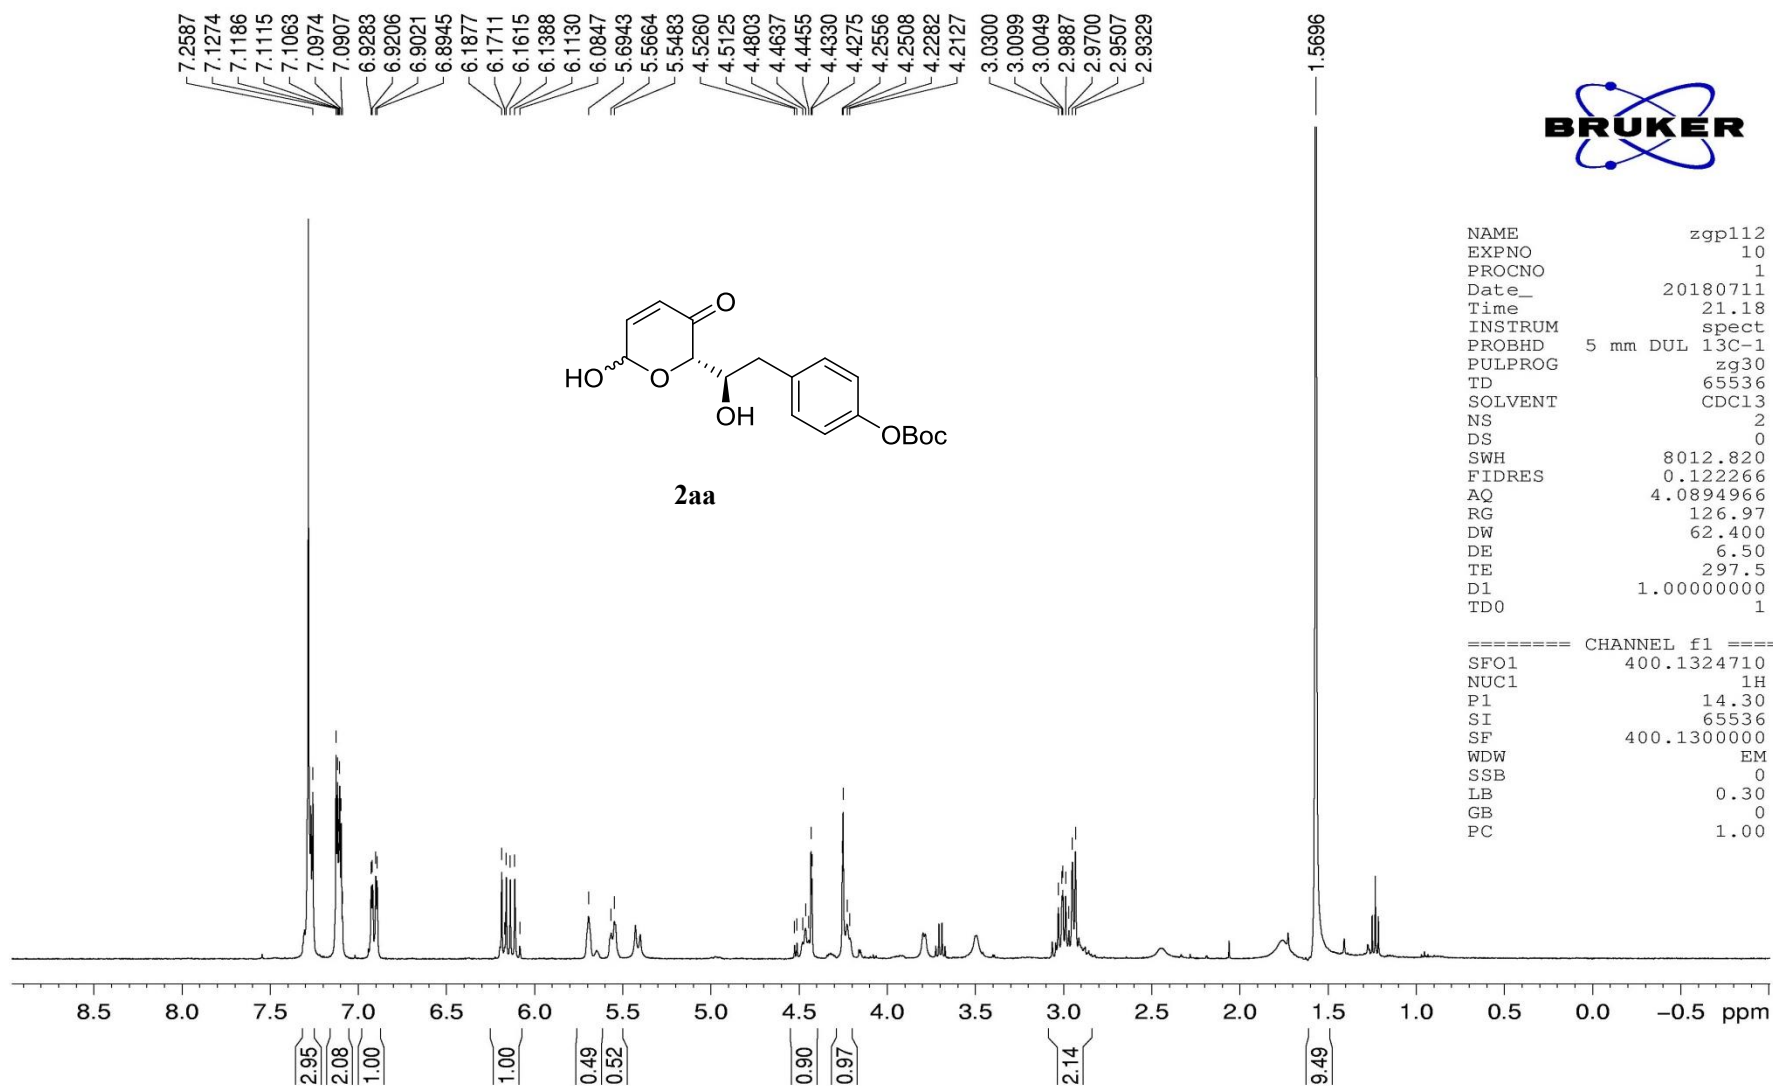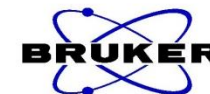

```

NAME          zgpl12
EXPNO         10
PROCNO        1
Date_         20180711
Time          21.18
INSTRUM       spect
PROBHD        5 mm DUL 13C-1
PULPROG       zg30
TD            65536
SOLVENT       CDCl3
NS            2
DS            0
SWH           8012.820 Hz
FIDRES        0.122266 Hz
AQ            4.0894966 sec
RG            126.97
DW            62.400 usec
DE            6.50 usec
TE            297.5 K
D1            1.00000000 sec
TD0           1
  
```

```

===== CHANNEL f1 =====
SFO1          400.1324710 MHz
NUC1           1H
P1            14.30 usec
SI            65536
SF            400.1300000 MHz
WDW           EM
SSB           0
LB            0.30 Hz
GB            0
PC            1.00
  
```



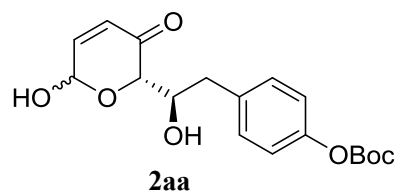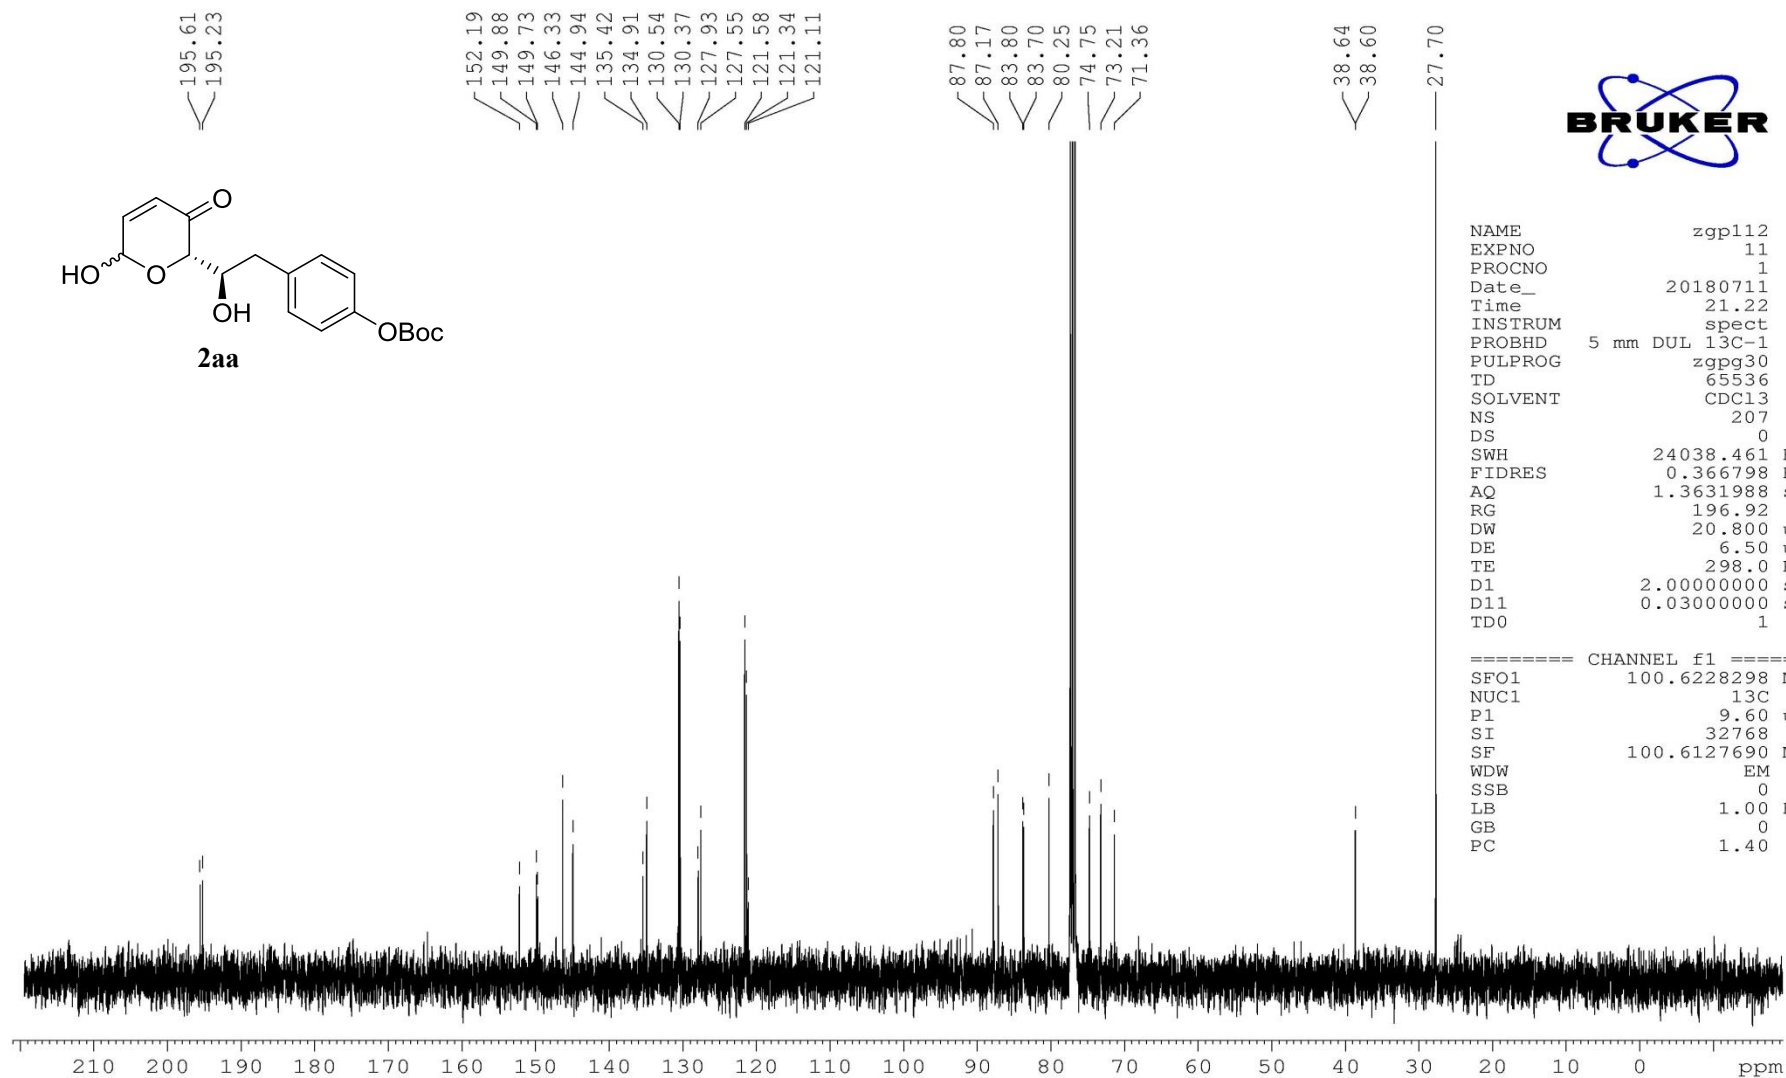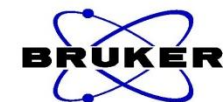

NAME zgp112  
 EXPNO 11  
 PROCNO 1  
 Date\_ 20180711  
 Time 21.22  
 INSTRUM spect  
 PROBHD 5 mm DUL 13C-1  
 PULPROG zgpg30  
 TD 65536  
 SOLVENT CDCl3  
 NS 207  
 DS 0  
 SWH 24038.461 Hz  
 FIDRES 0.366798 Hz  
 AQ 1.3631988 sec  
 RG 196.92  
 DW 20.800 usec  
 DE 6.50 usec  
 TE 298.0 K  
 D1 2.00000000 sec  
 D11 0.03000000 sec  
 TD0 1

===== CHANNEL f1 =====  
 SFO1 100.6228298 MHz  
 NUC1 13C  
 P1 9.60 usec  
 SI 32768  
 SF 100.6127690 MHz  
 WDW EM  
 SSB 0  
 LB 1.00 Hz  
 GB 0  
 PC 1.40



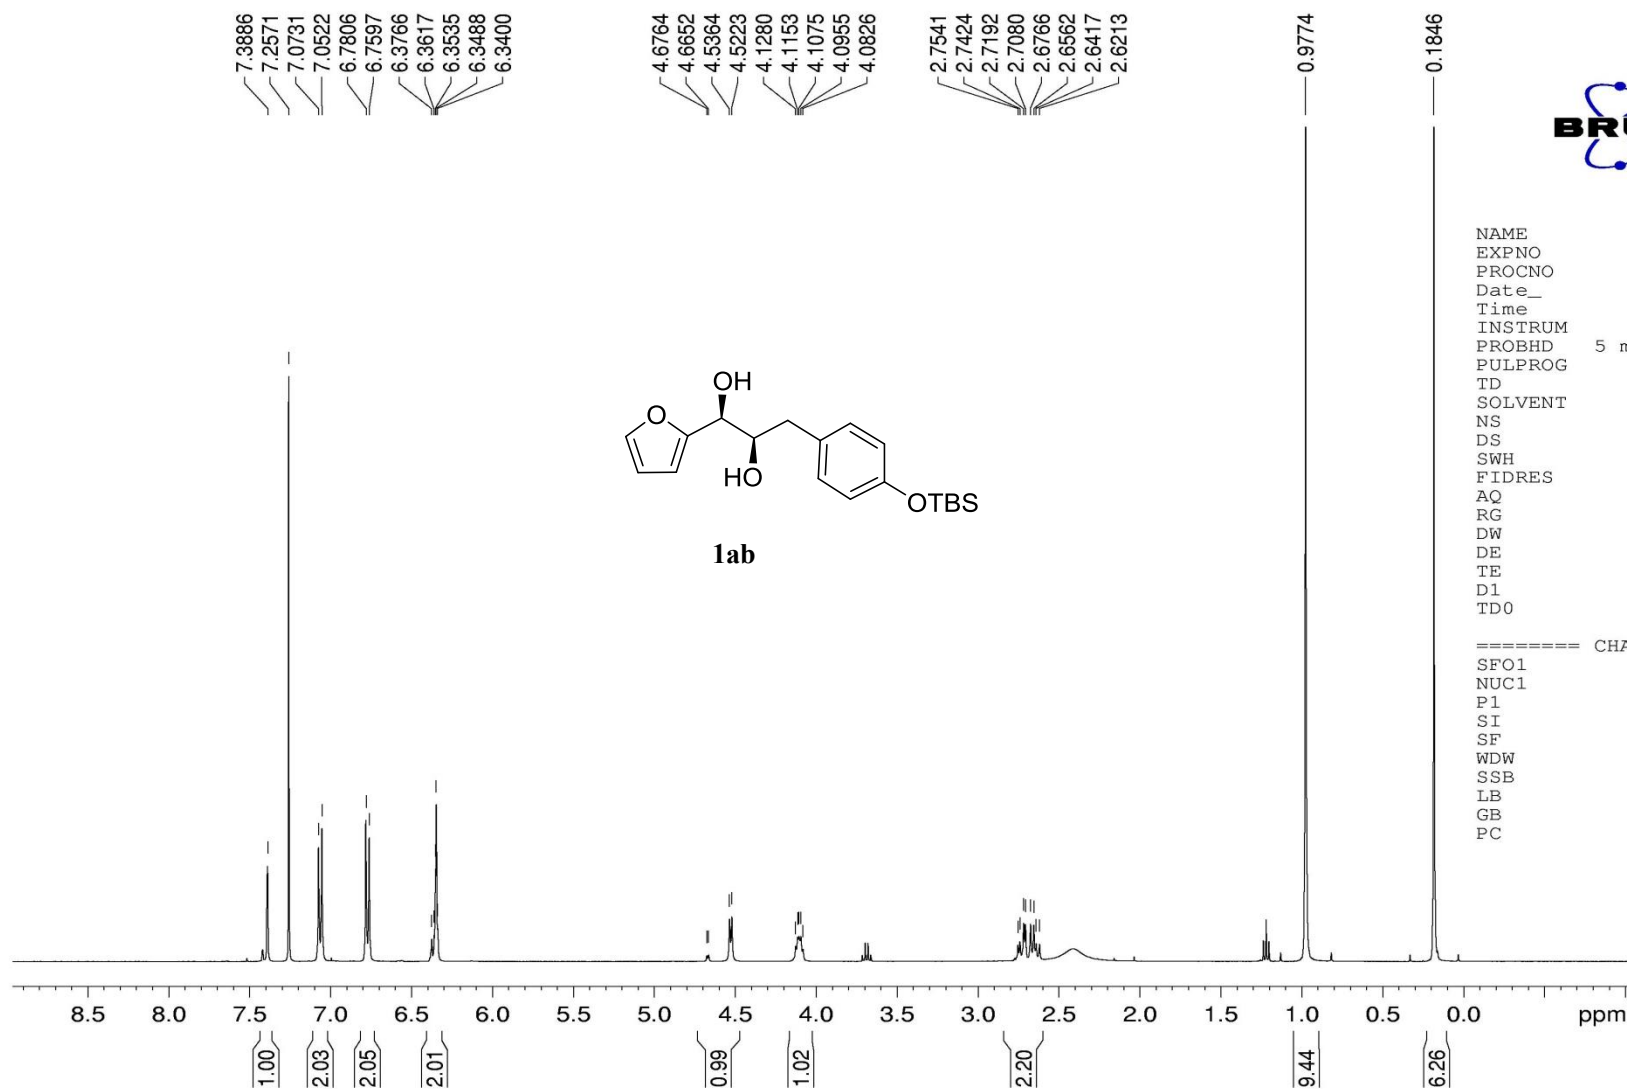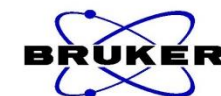

NAME zgp96-YL  
 EXPNO 4  
 PROCNO 1  
 Date\_ 20180707  
 Time 17.40  
 INSTRUM spect  
 PROBHD 5 mm DUL 13C-1  
 PULPROG zg30  
 TD 65536  
 SOLVENT CDCl3  
 NS 3  
 DS 0  
 SWH 8012.820 Hz  
 FIDRES 0.122266 Hz  
 AQ 4.0894966 sec  
 RG 62.93  
 DW 62.400 usec  
 DE 6.50 usec  
 TE 298.2 K  
 D1 1.00000000 sec  
 TD0 1

===== CHANNEL f1 =====  
 SFO1 400.1324710 MHz  
 NUC1 1H  
 P1 14.30 usec  
 SI 65536  
 SF 400.1300110 MHz  
 WDW EM  
 SSB 0  
 LB 0.30 Hz  
 GB 0  
 PC 1.00

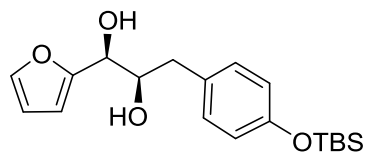

**1ab**

154.36  
154.04  
142.33  
130.37  
130.33  
130.21  
120.14  
110.40  
107.85  
74.30  
70.08  
38.58  
25.69  
18.20  
-4.41

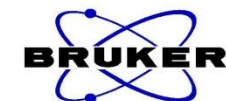

NAME zgp96-YL  
EXPNO 5  
PROCNO 1  
Date\_ 20180707  
Time 17.42  
INSTRUM spect  
PROBHD 5 mm DUL 13C-1  
PULPROG zgpg30  
TD 65536  
SOLVENT CDC13  
NS 91  
DS 0  
SWH 24038.461 Hz  
FIDRES 0.366798 Hz  
AQ 1.3631988 sec  
RG 196.92  
DW 20.800 usec  
DE 6.50 usec  
TE 298.6 K  
D1 2.00000000 sec  
D11 0.03000000 sec  
TD0 1

===== CHANNEL f1 =====  
SFO1 100.6228298 MHz  
NUC1 13C  
P1 9.60 usec  
SI 32768  
SF 100.6127690 MHz  
WDW EM  
SSB 0  
LB 1.00 Hz  
GB 0  
PC 1.40

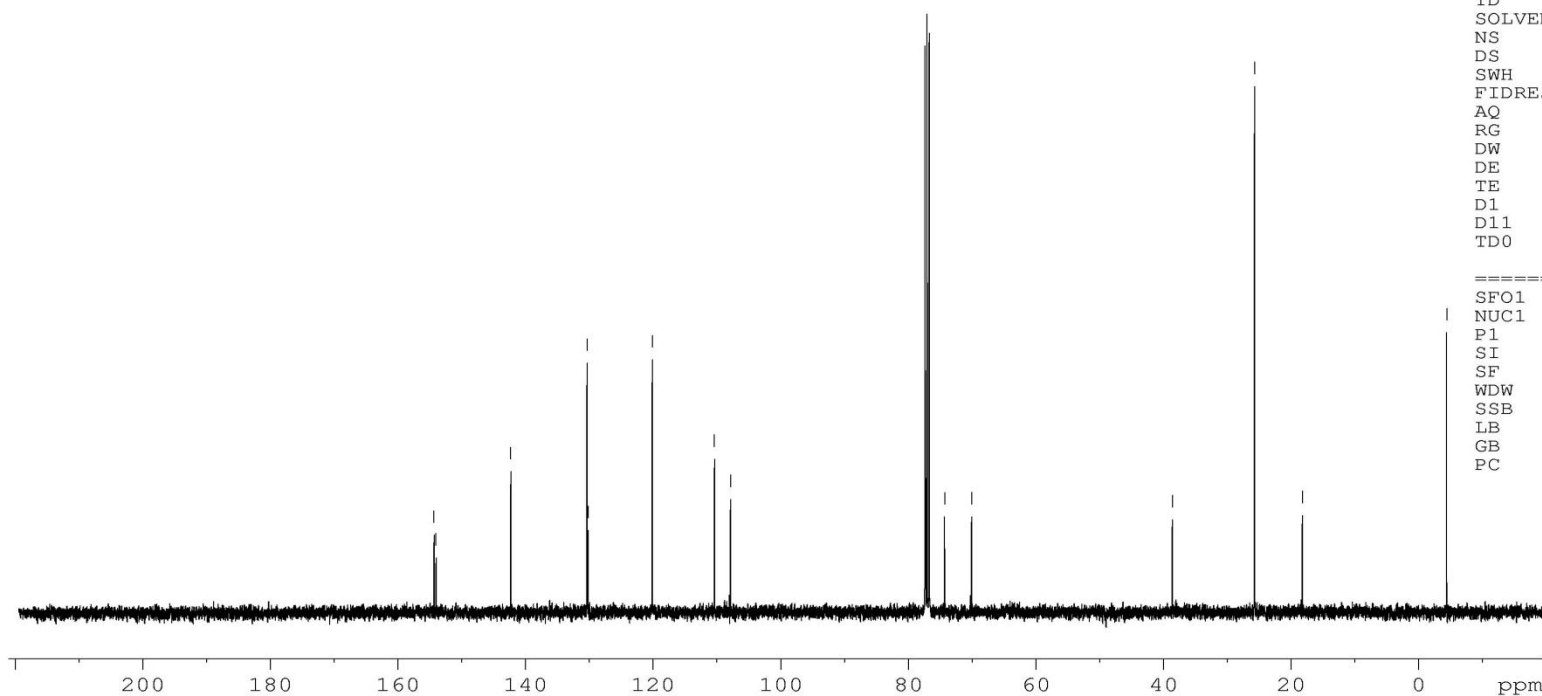



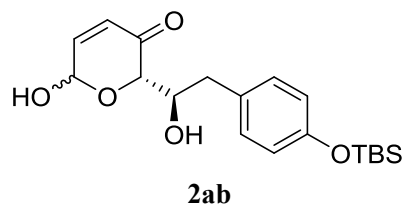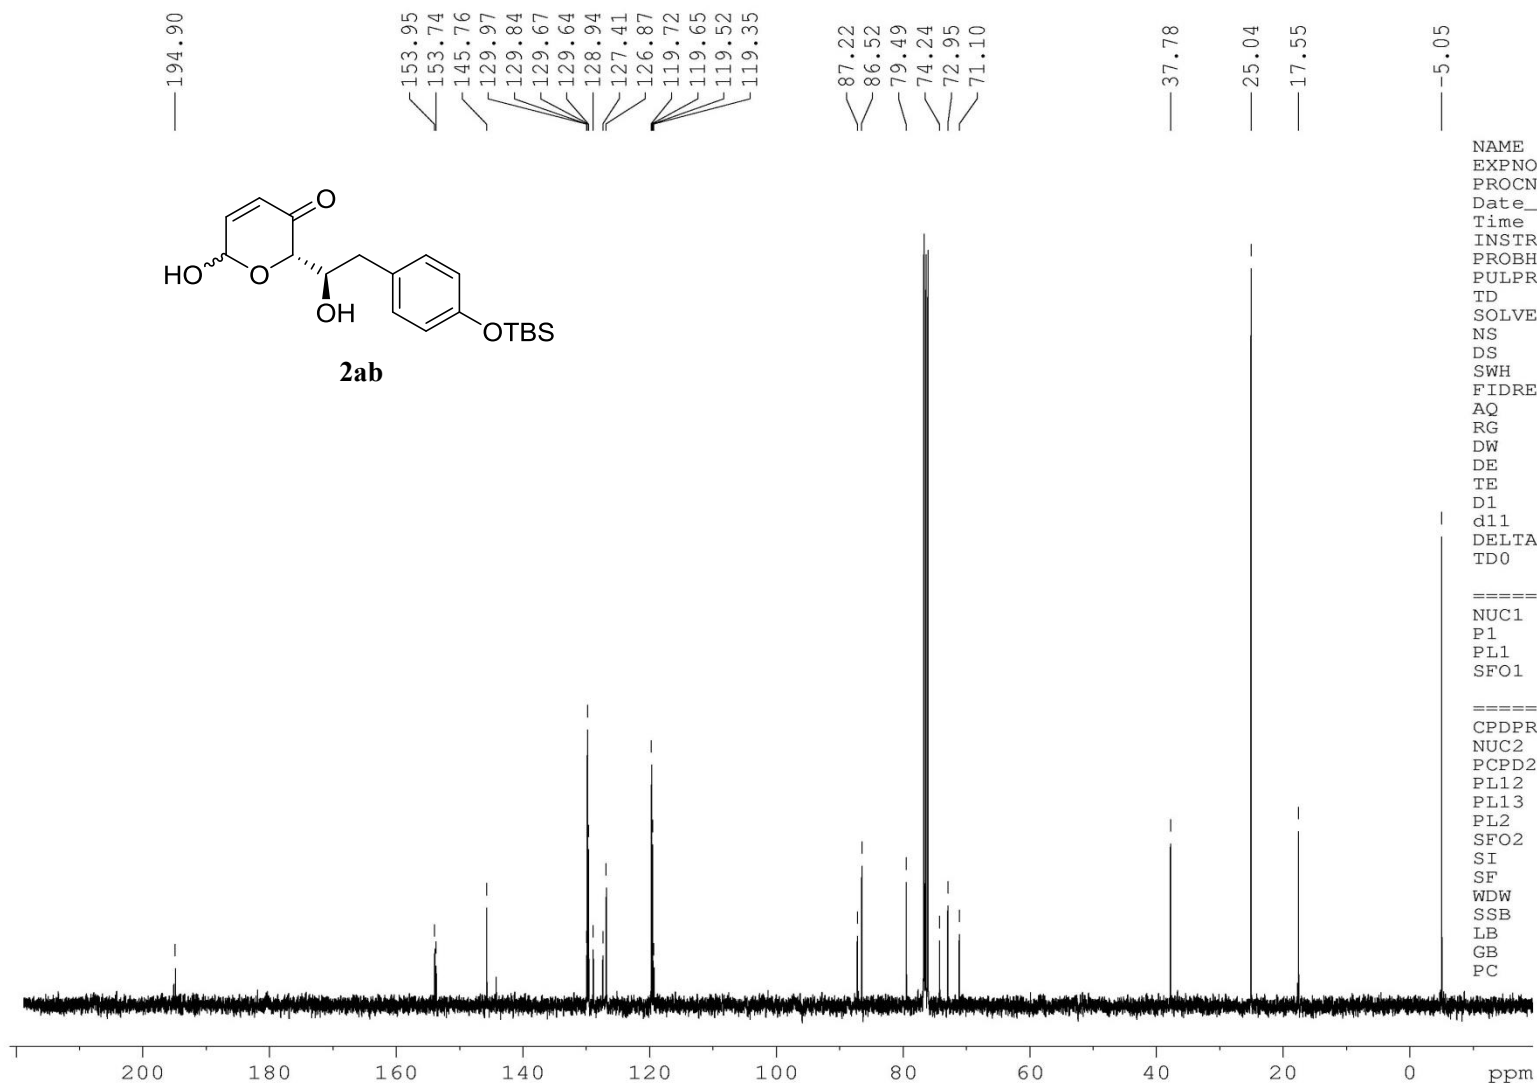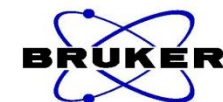

```

NAME                zgp96
EXPNO                3
PROCNO              1
Date_               20180707
Time                13.56
INSTRUM             spect
PROBHD              5 mm PABBO BB-
PULPROG             zgpg30
TD                  65536
SOLVENT             CDC13
NS                   156
DS                   0
SWH                 24038.461 Hz
FIDRES              0.366798 Hz
AQ                  1.3631988 sec
RG                   322
DW                  20.800 usec
DE                   6.00 usec
TE                  295.3 K
D1                   2.00000000 sec
d11                  0.03000000 sec
DELTA               1.899999998 sec
TD0                  1
  
```

```

===== CHANNEL f1 =====
NUC1                  13C
P1                     8.60 usec
PL1                    -3.00 dB
SFO1                 100.6228298 MHz
  
```

```

===== CHANNEL f2 =====
CPDPRG2              waltz16
NUC2                   1H
PCPD2                 80.00 usec
PL12                  14.39 dB
PL13                  18.00 dB
PL2                    -1.00 dB
SFO2                 400.1316005 MHz
SI                     32768
SF                  100.6128330 MHz
WDW                     EM
SSB                      0
LB                      1.00 Hz
GB                      0
PC                      1.40
  
```

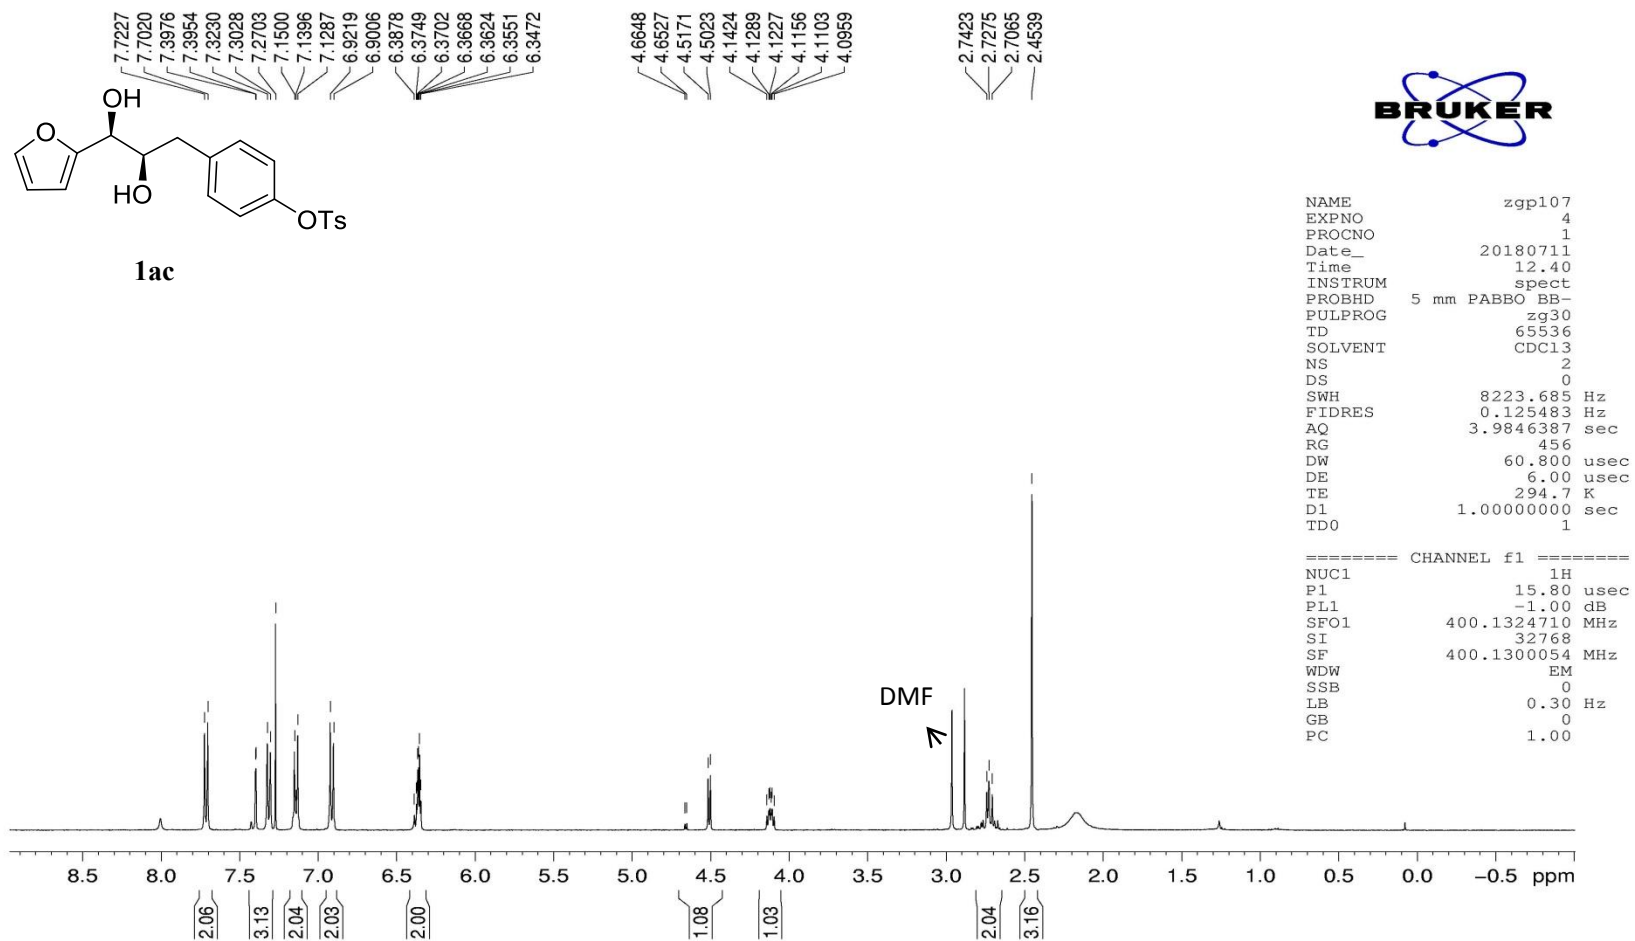

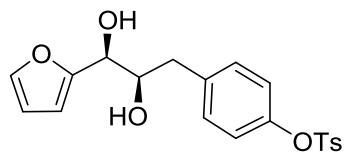

**1ac**

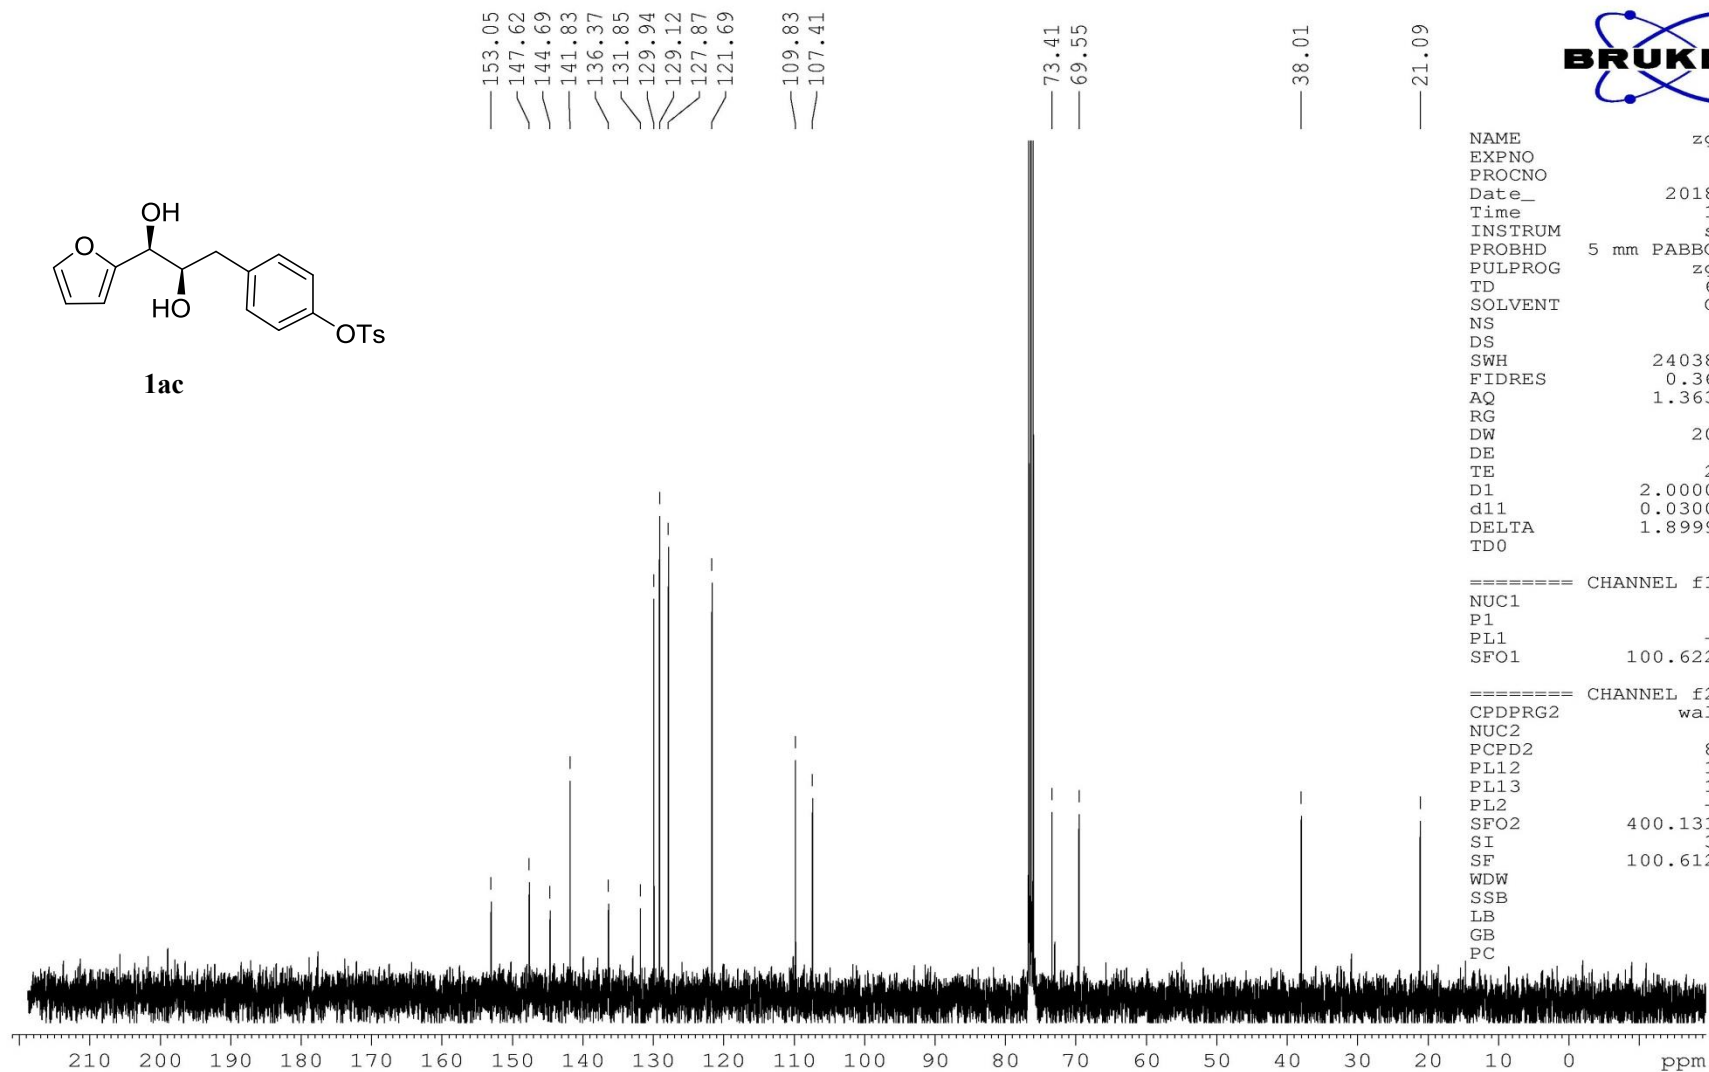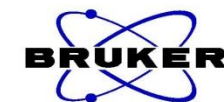

```

NAME                zgp107
EXPNO                6
PROCNO              1
Date_                20180711
Time                12.46
INSTRUM              spect
PROBHD               5 mm PABBO BB-
PULPROG              zgpg30
TD                   65536
SOLVENT              CDCl3
NS                   141
DS                    0
SWH                  24038.461 Hz
FIDRES               0.366798 Hz
AQ                   1.3631988 sec
RG                    114
DW                   20.800 usec
DE                    6.00 usec
TE                   295.2 K
D1                   2.00000000 sec
d11                   0.03000000 sec
DELTA                1.89999998 sec
TD0                   1
  
```

```

===== CHANNEL f1 =====
NUC1                  13C
P1                     8.60 usec
PL1                    -3.00 dB
SFO1                 100.6228298 MHz
  
```

```

===== CHANNEL f2 =====
CPDPRG2               waltz16
NUC2                   1H
PCPD2                  80.00 usec
PL12                   14.39 dB
PL13                   18.00 dB
PL2                     -1.00 dB
SFO2                 400.1316005 MHz
SI                     32768
SF                   100.6128330 MHz
WDW                     EM
SSB                      0
LB                      1.00 Hz
GB                      0
PC                      1.40
  
```

7.7282  
7.7183  
7.7123  
7.7066  
7.6979  
7.3432  
7.3314  
7.3233  
7.3115  
7.2009  
7.1963  
7.1794  
7.1751  
6.9681  
6.9594  
6.9432  
6.9371  
6.9253  
6.9219  
6.9104  
6.9042  
6.1956  
6.1694  
6.1508  
6.1251  
5.7604  
5.7518  
5.5934  
5.5857  
4.4265  
4.4114  
4.3959  
4.2187  
4.2063  
4.2008  
4.1894  
4.1860

2.9960  
2.9802  
2.9167  
2.9001  
2.8834  
2.4674  
2.4604

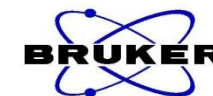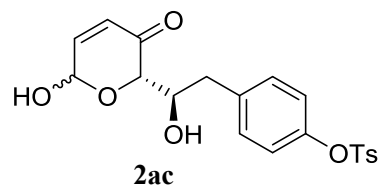

NAME zgp108  
EXPNO 10  
PROCNO 1  
Date\_ 20180711  
Time 21.03  
INSTRUM spect  
PROBHD 5 mm DUL 13C-1  
PULPROG zg30  
TD 65536  
SOLVENT CDCl3  
NS 3  
DS 0  
SWH 8012.820 Hz  
FIDRES 0.122266 Hz  
AQ 4.0894966 sec  
RG 126.97  
DW 62.400 usec  
DE 6.50 usec  
TE 297.2 K  
D1 1.00000000 sec  
TD0 1

===== CHANNEL f1 =====  
SFO1 400.1324710 MHz  
NUC1 1H  
P1 14.30 usec  
SI 65536  
SF 400.1300000 MHz  
WDW EM  
SSB 0  
LB 0.30 Hz  
GB 0  
PC 1.00

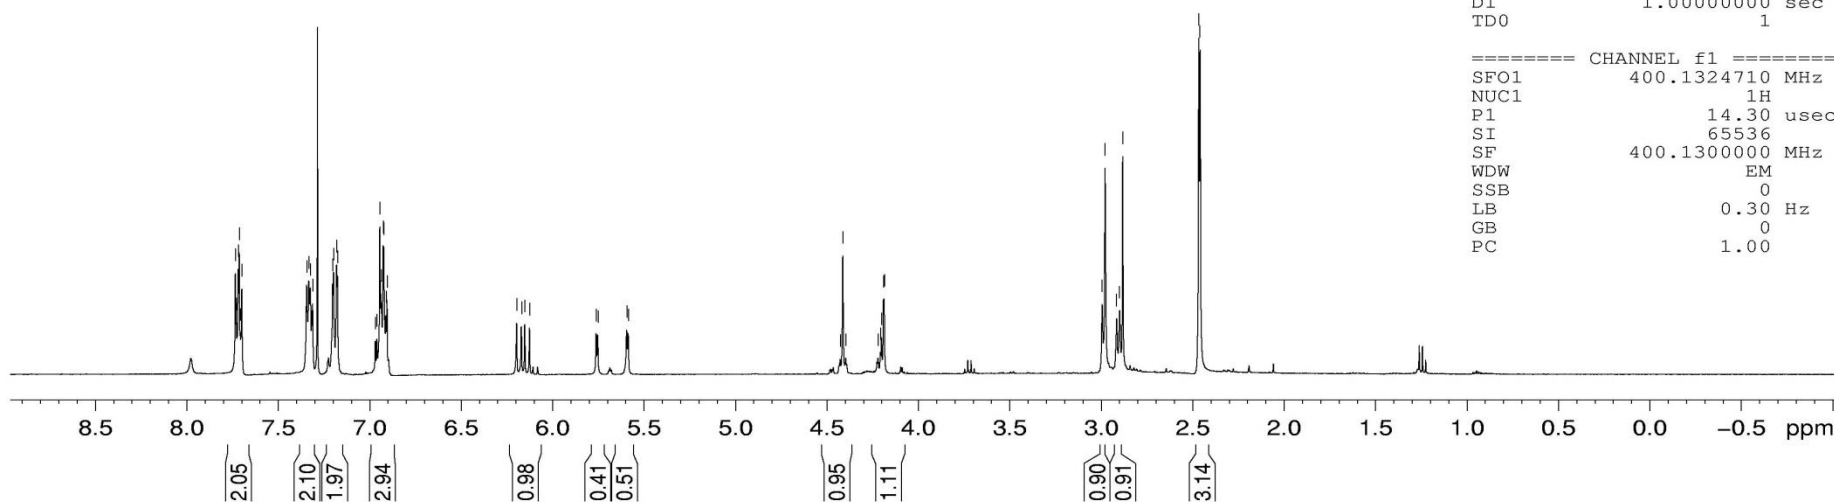

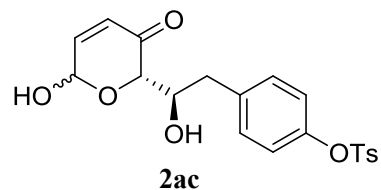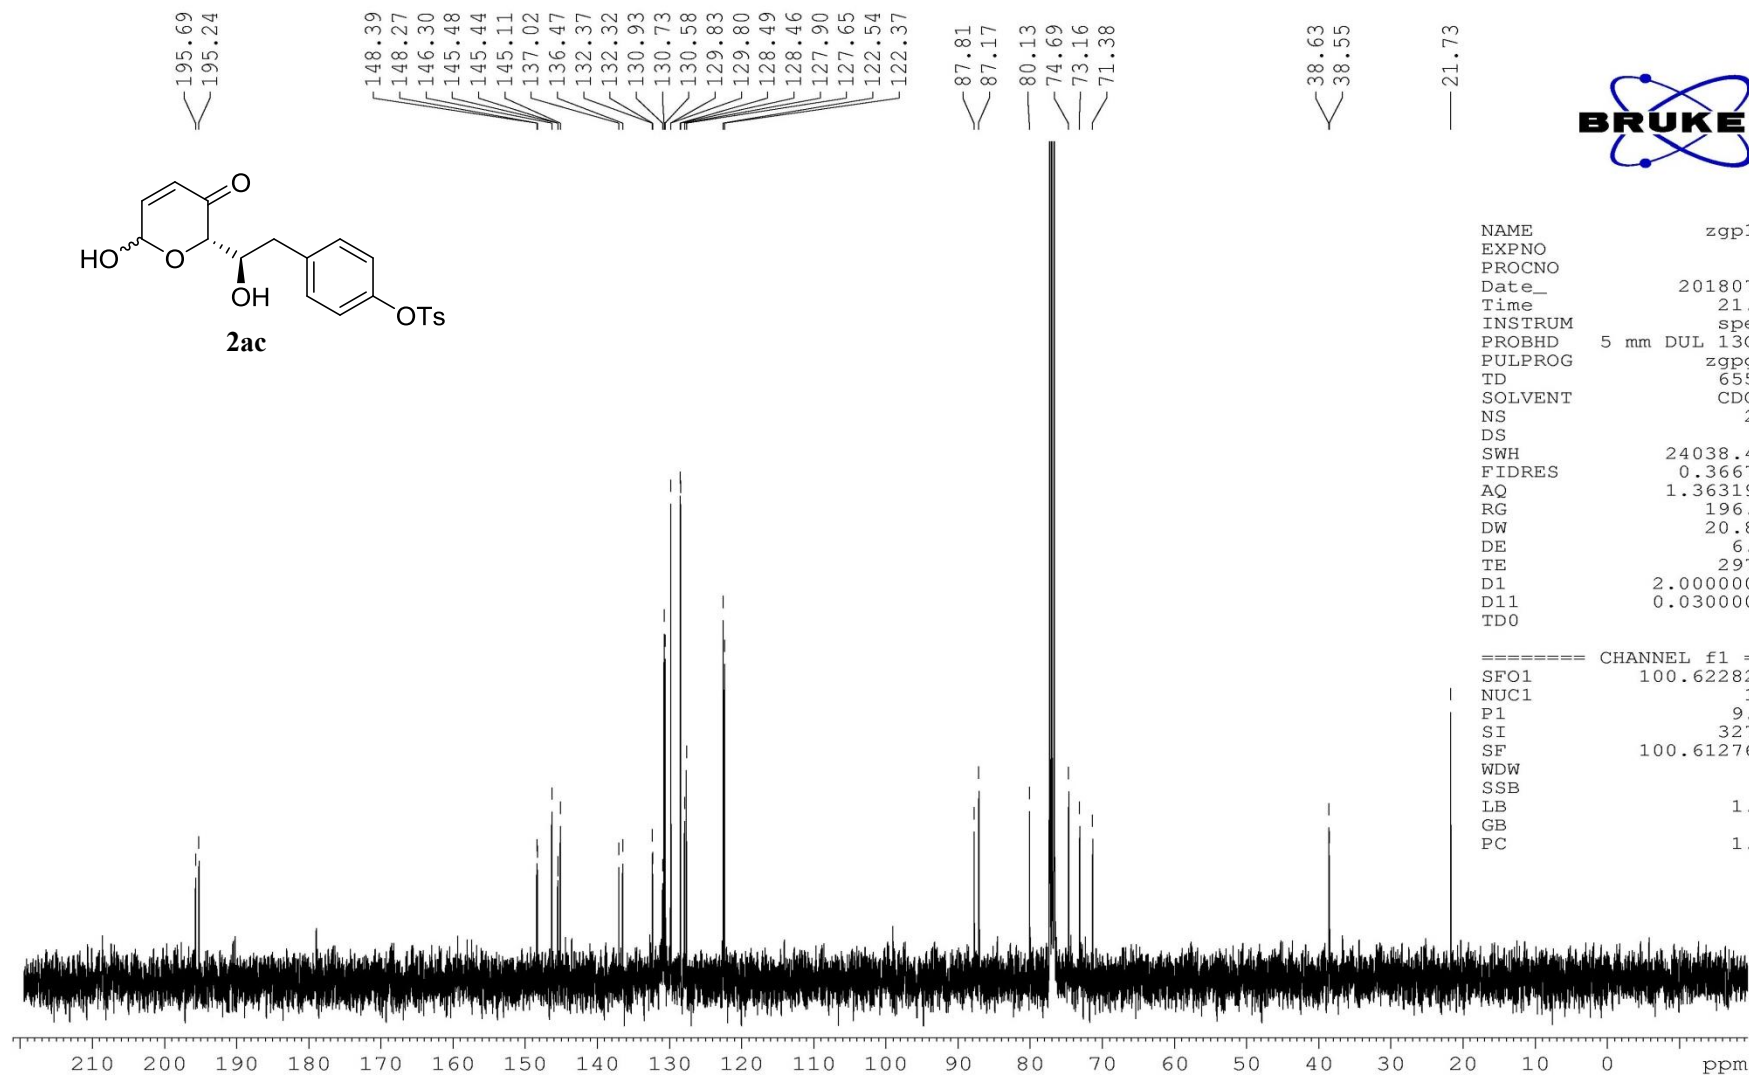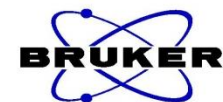

```

NAME                zgp108
EXPNO                11
PROCNO               1
Date_                20180711
Time                21.06
INSTRUM              spect
PROBHD               5 mm DUL 13C-1
PULPROG              zgpg30
TD                   65536
SOLVENT              CDCl3
NS                   214
DS                    0
SWH                  24038.461 Hz
FIDRES               0.366798 Hz
AQ                   1.3631988 sec
RG                   196.92
DW                   20.800 usec
DE                    6.50 usec
TE                   297.6 K
D1                   2.00000000 sec
D11                  0.03000000 sec
TD0                  1
  
```

```

===== CHANNEL f1 =====
SFO1                100.6228298 MHz
NUC1                 13C
P1                   9.60 usec
SI                   32768
SF                   100.6127690 MHz
WDW                  EM
SSB                  0
LB                   1.00 Hz
GB                   0
PC                   1.40
  
```



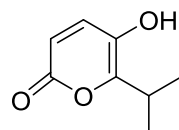

3

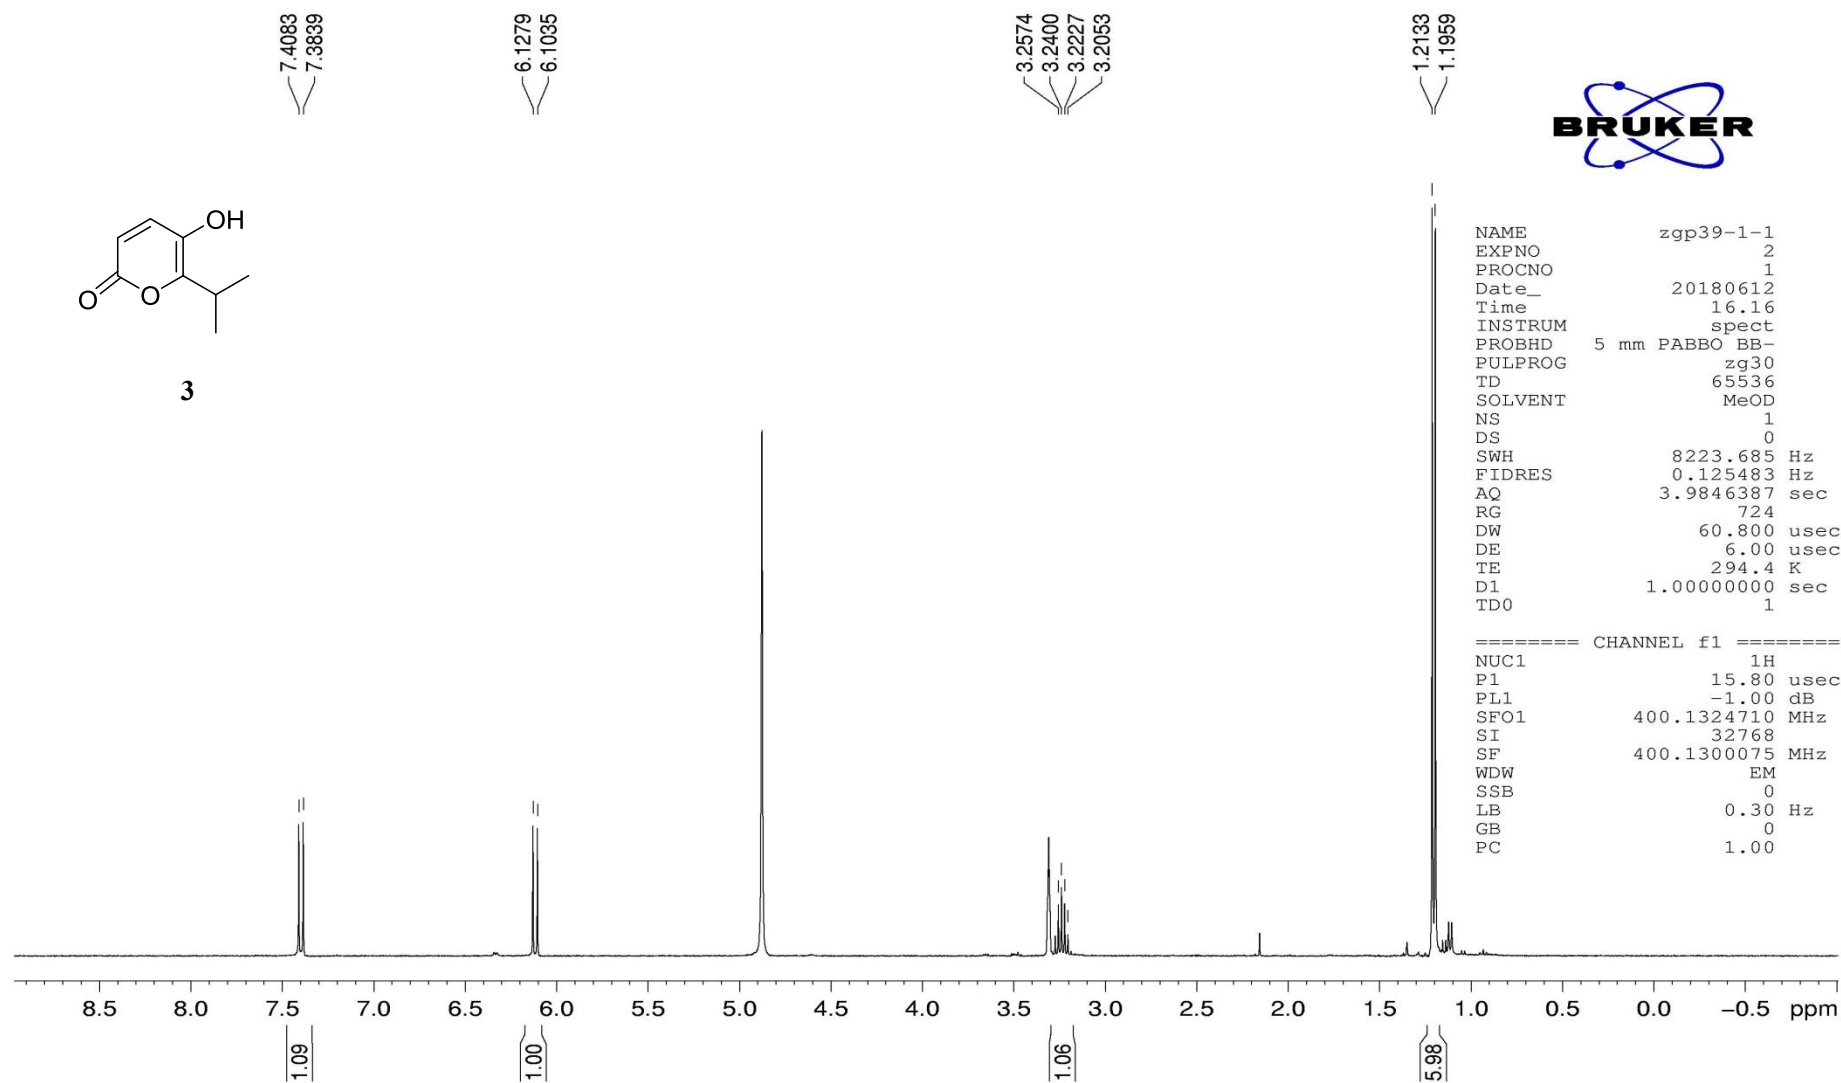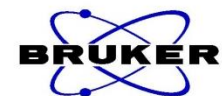

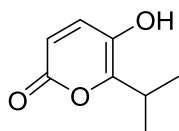

3

—164.82

—155.42

—143.92

—136.04

—113.41

—28.07

—19.89

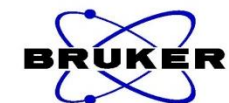

```

NAME                zgp39
EXPNO                21
PROCNO               1
Date_                20180612
Time                17.46
INSTRUM              spect
PROBHD               5 mm DUL 13C-1
PULPROG              zgpg30
TD                   65536
SOLVENT              MeOD
NS                   37
DS                   0
SWH                  24038.461 Hz
FIDRES               0.366798 Hz
AQ                   1.3631988 sec
RG                   196.92
DW                   20.800 usec
DE                   6.50 usec
TE                   294.5 K
D1                   2.00000000 sec
D11                  0.03000000 sec
TD0                  1
  
```

```

===== CHANNEL f1 =====
SFO1                100.6228298 MHz
NUC1                 13C
P1                   9.60 usec
SI                   32768
SF                   100.6126269 MHz
WDW                  EM
SSB                  0
LB                   1.00 Hz
GB                   0
PC                   1.40
  
```

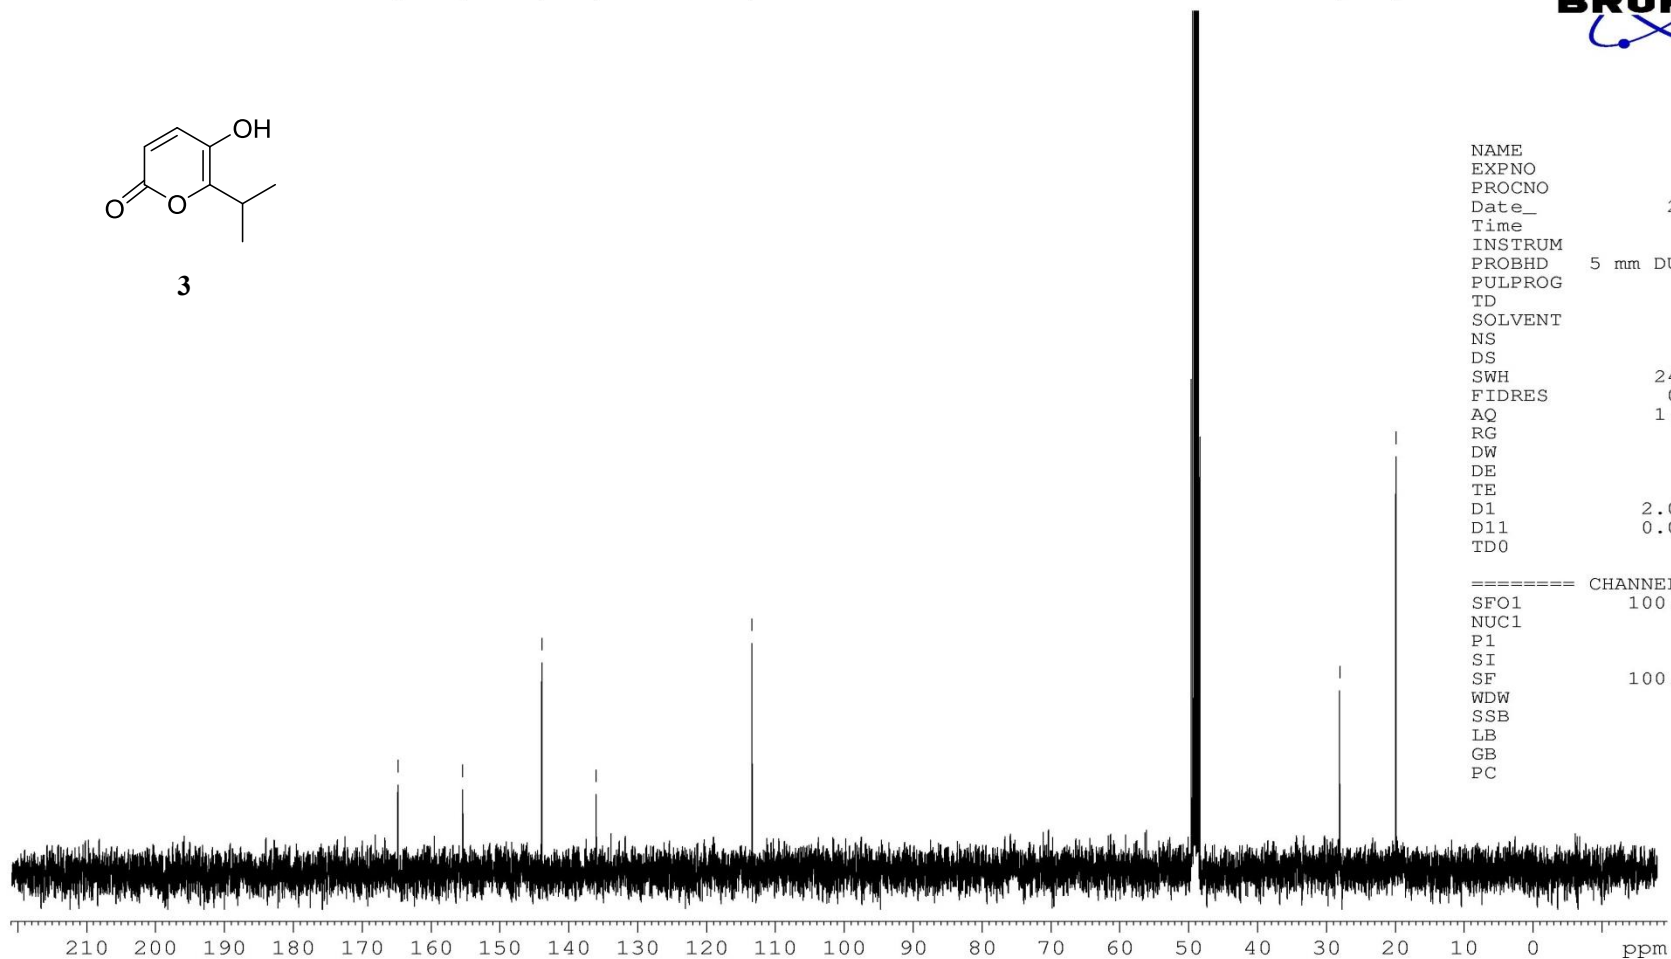

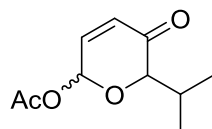

4

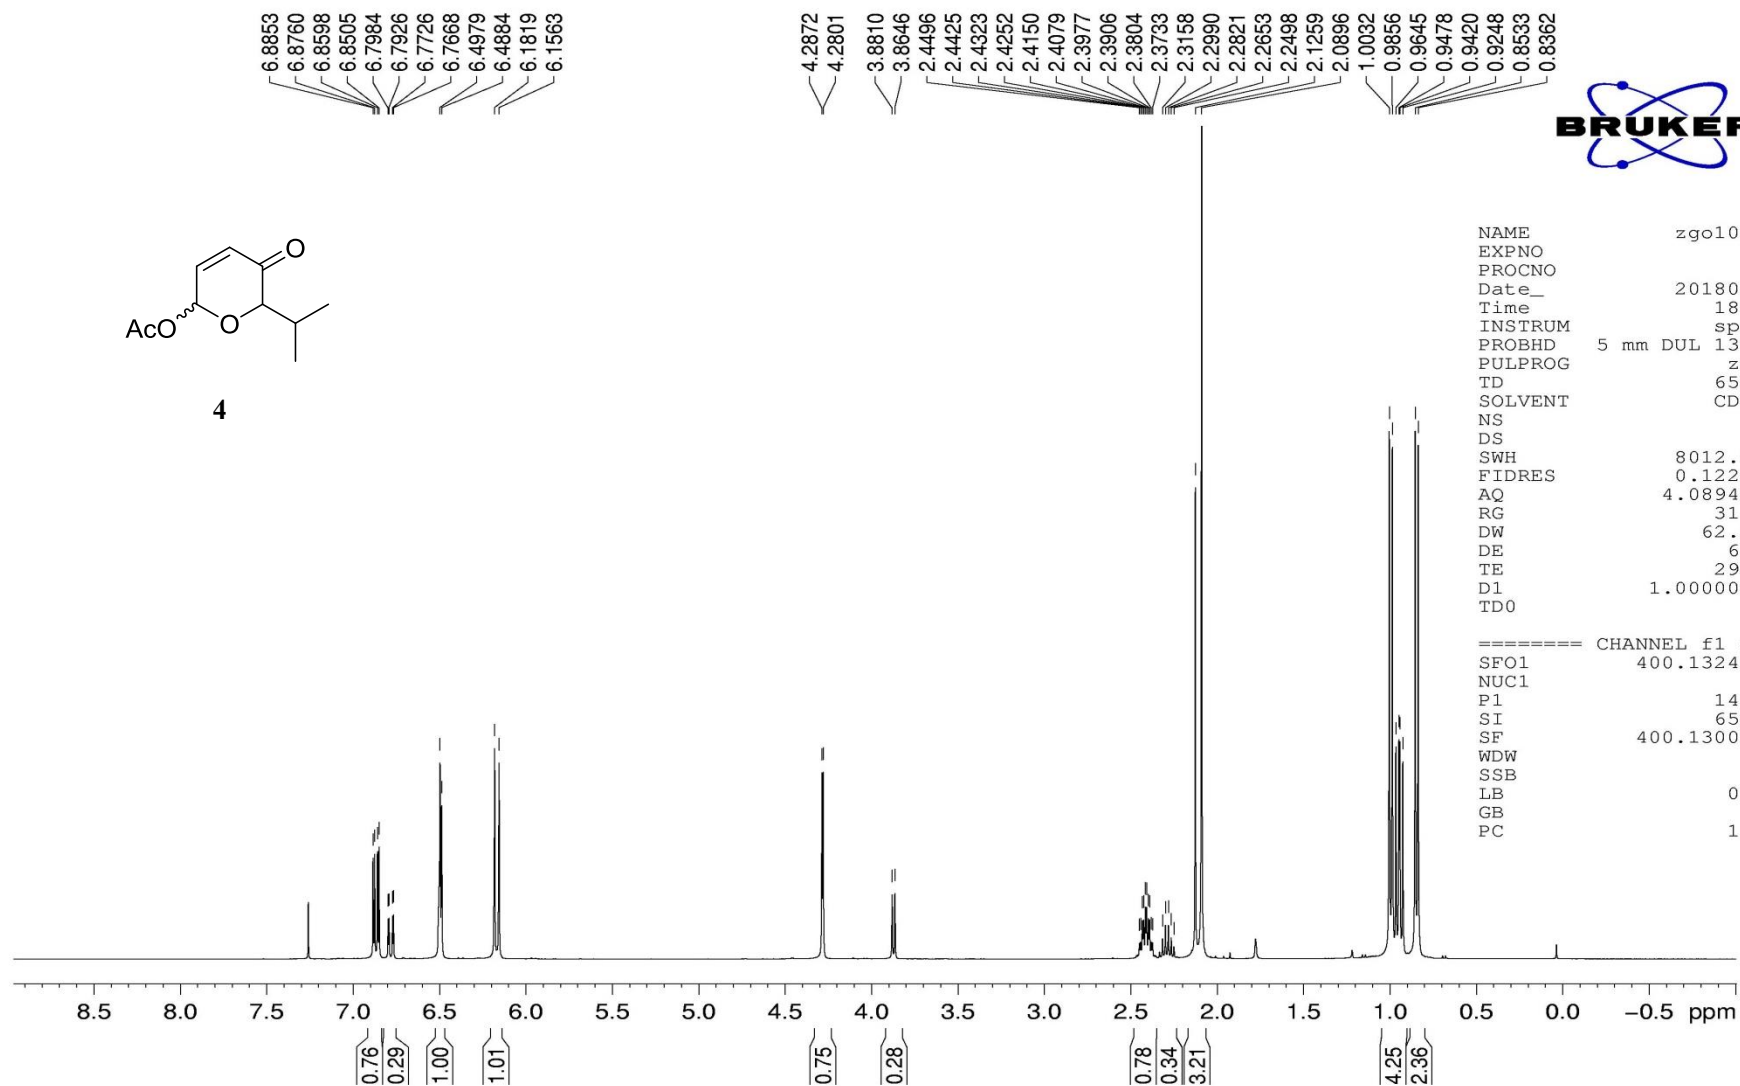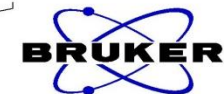

```

NAME                zgo100-1
EXPNO                1
PROCNO              1
Date_               20180323
Time                18.17
INSTRUM             spect
PROBHD              5 mm DUL 13C-1
PULPROG             zg30
TD                  65536
SOLVENT             CDCl3
NS                   8
DS                   2
SWH                 8012.820 Hz
FIDRES              0.122266 Hz
AQ                  4.0894966 sec
RG                   31.55
DW                  62.400 usec
DE                   6.50 usec
TE                   294.8 K
D1                   1.00000000 sec
TD0                  1

===== CHANNEL f1 =====
SFO1                 400.1324710 MHz
NUC1                  1H
P1                   14.30 usec
SI                   65536
SF                   400.1300103 MHz
WDW                   EM
SSB                    0
LB                    0.30 Hz
GB                    0
PC                    1.00
  
```

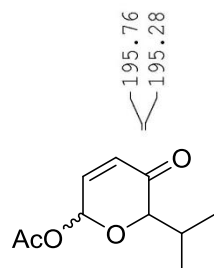

4

195.76  
195.28

169.65  
169.41

143.17  
141.65

129.21  
129.19

87.94  
87.30  
84.28  
80.08

30.51  
28.93  
21.07  
21.01  
18.81  
18.77  
17.89  
16.00

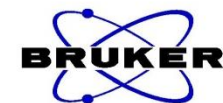

```

NAME          zgo100-1
EXPNO          2
PROCNO         1
Date_          20180323
Time           18.20
INSTRUM        spect
PROBHD         5 mm DUL 13C-1
PULPROG        zgpg30
TD             65536
SOLVENT        CDCl3
NS             71
DS             2
SWH            24038.461 Hz
FIDRES         0.366798 Hz
AQ            1.3631988 sec
RG            196.92
DW            20.800 usec
DE             6.50 usec
TE            295.3 K
D1            2.00000000 sec
D11           0.03000000 sec
TD0            1
  
```

```

===== CHANNEL f1 =====
SFO1          100.6228298 MHz
NUC1           13C
P1             9.60 usec
SI            32768
SF            100.6127601 MHz
WDW            EM
SSB            0
LB             1.00 Hz
GB            0
PC            1.40
  
```

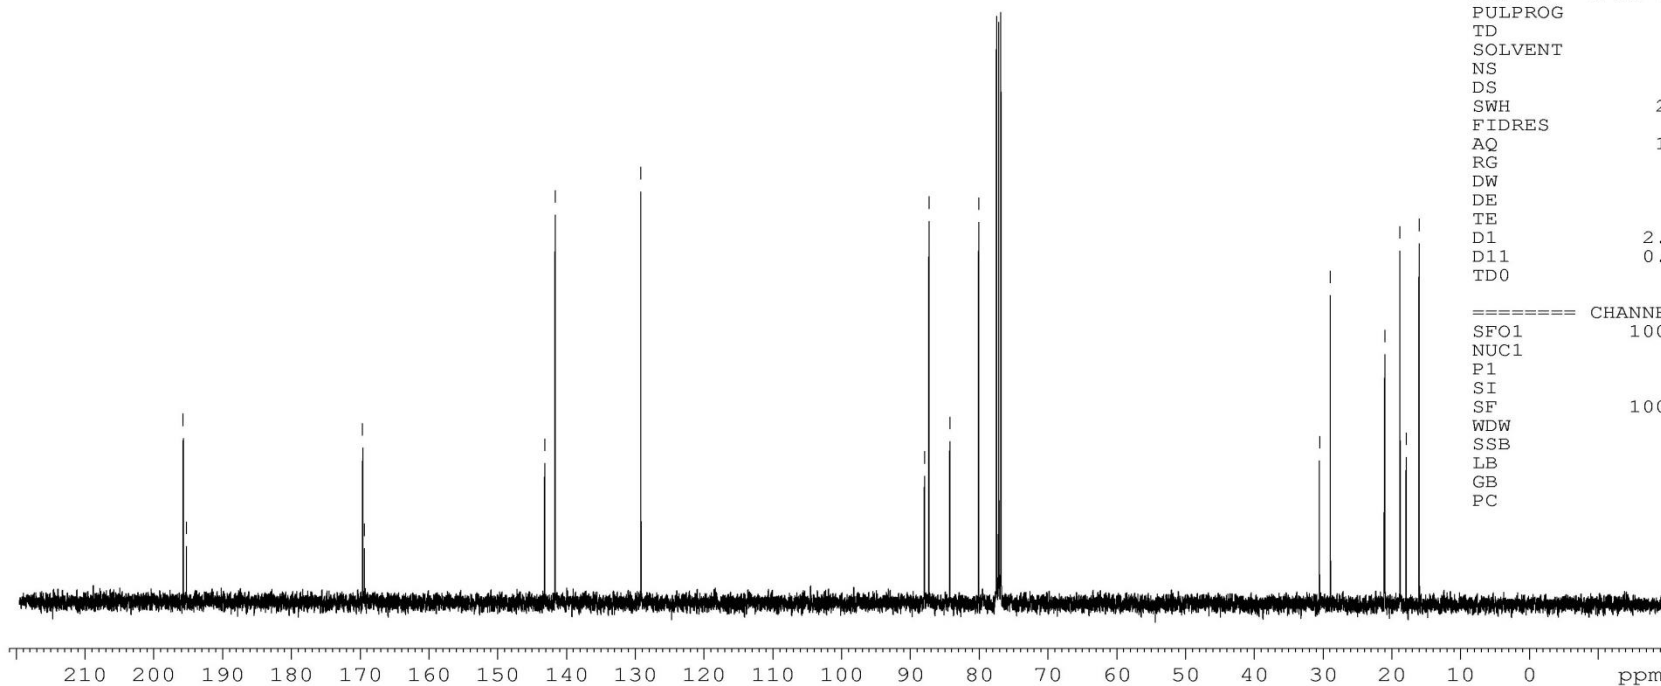

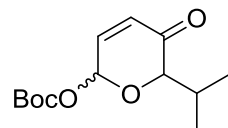

5

6.9084  
6.8993  
6.8829  
6.8738  
6.3907  
6.3816  
6.2209  
6.1954

4.3848  
4.3778

2.4882  
2.4814  
2.4709  
2.4641  
2.4536  
2.4467

1.5323

1.0564  
1.0389  
0.9037  
0.8867

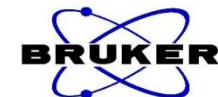

NAME zgpl47-1  
EXPNO 1  
PROCNO 1  
Date\_ 20180727  
Time 22.49  
INSTRUM spect  
PROBHD 5 mm DUL 13C-1  
PULPROG zg30  
TD 65536  
SOLVENT CDCl3  
NS 3  
DS 0  
SWH 8012.820 Hz  
FIDRES 0.122266 Hz  
AQ 4.0894966 sec  
RG 88.84  
DW 62.400 usec  
DE 6.50 usec  
TE 297.3 K  
D1 1.00000000 sec  
TD0 1

===== CHANNEL f1 =====  
SFO1 400.1324710 MHz  
NUC1 1H  
P1 14.30 usec  
SI 65536  
SF 400.1300000 MHz  
WDW EM  
SSB 0  
LB 0.30 Hz  
GB 0  
PC 1.00

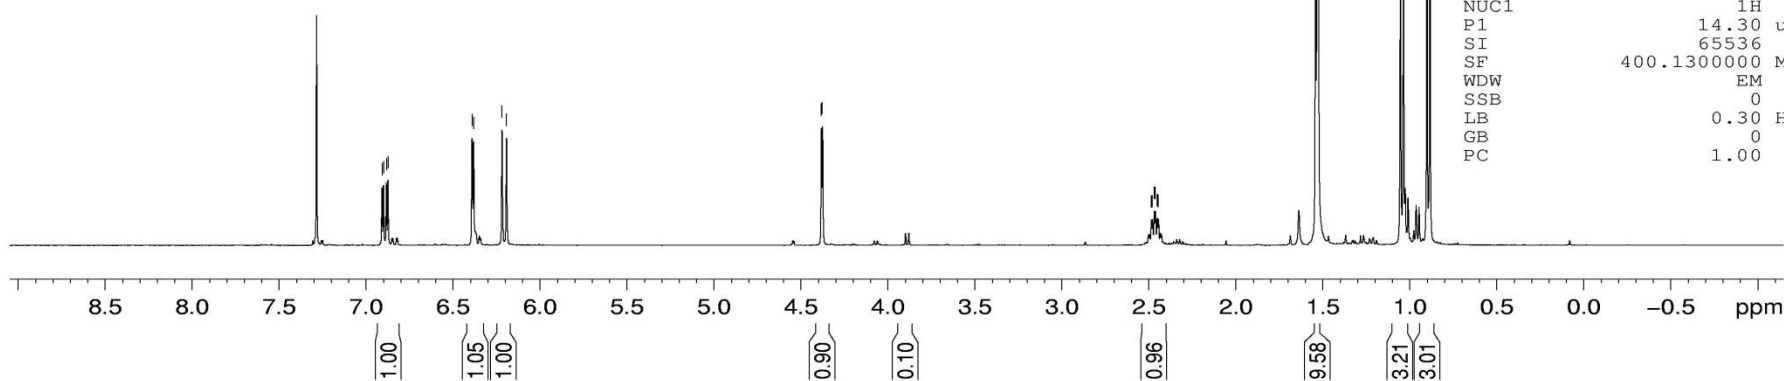

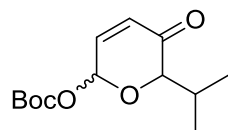

5

—195.51

—151.83

—140.82

—129.40

—89.41

—83.47

—79.71

—28.60  
—27.66

—18.65  
—15.89

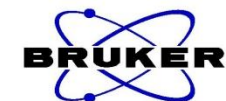

```

NAME          zgpl47-1
EXPNO          2
PROCNO         1
Date_          20180727
Time           22.52
INSTRUM        spect
PROBHD         5 mm DUL 13C-1
PULPROG        zgpg30
TD             65536
SOLVENT        CDCl3
NS             51
DS             0
SWH            24038.461 Hz
FIDRES         0.366798 Hz
AQ             1.3631988 sec
RG             196.92
DW            20.800 usec
DE             6.50 usec
TE            297.8 K
D1            2.00000000 sec
D11           0.03000000 sec
TD0            1
  
```

```

===== CHANNEL f1 =====
SFO1          100.6228298 MHz
NUC1          13C
P1            9.60 usec
SI            32768
SF            100.6127690 MHz
WDW           EM
SSB           0
LB            1.00 Hz
GB            0
PC            1.40
  
```

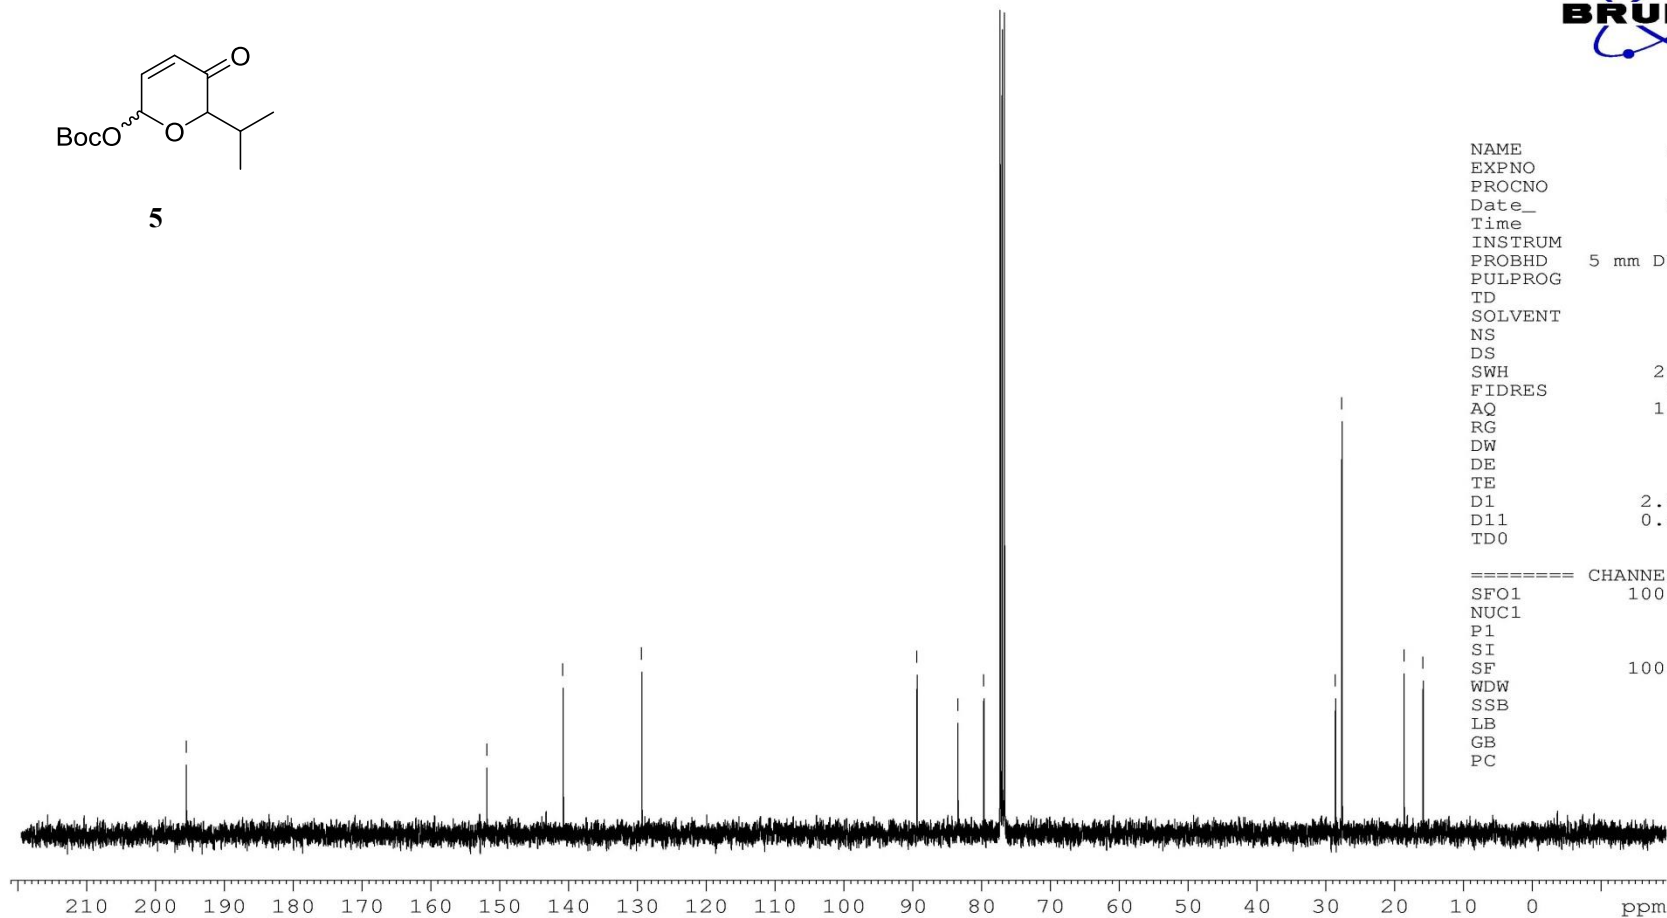

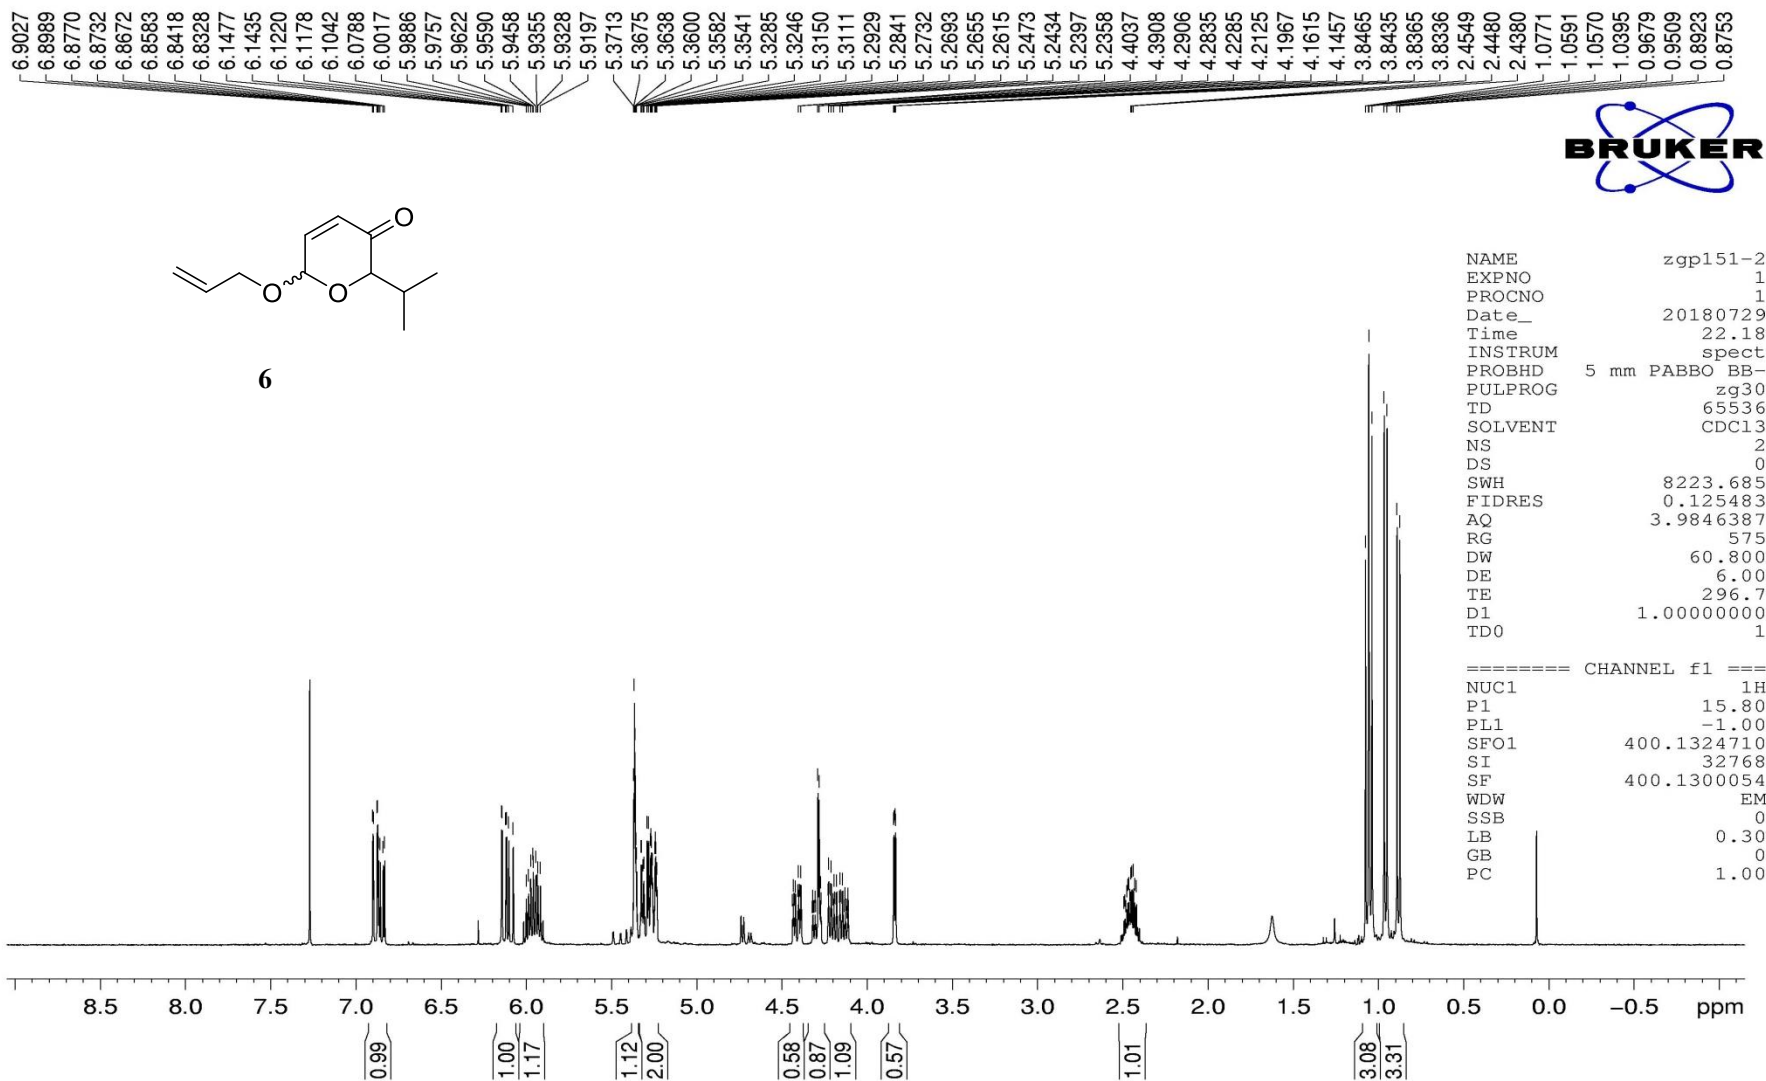

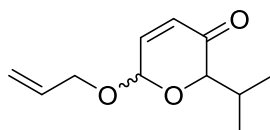

6

196.07  
195.71

146.42  
142.64

133.04  
128.89  
127.74

117.43

94.65  
91.49

82.48  
77.50

68.85  
68.80

28.59  
27.73  
18.52  
18.45  
16.15  
15.36

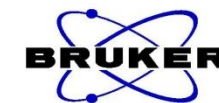

```

NAME          zgp151-2
EXPNO         2
PROCNO        1
Date_         20180729
Time          22.22
INSTRUM       spect
PROBHD        5 mm PABBO BB-
PULPROG       zgpg30
TD            65536
SOLVENT       CDCl3
NS            169
DS            0
SWH           24038.461 Hz
FIDRES        0.366798 Hz
AQ            1.3631988 sec
RG            114
DW            20.800 usec
DE            6.00 usec
TE            297.0 K
D1            2.00000000 sec
d11           0.03000000 sec
DELTA         1.89999998 sec
TD0           1
  
```

```

===== CHANNEL f1 =====
NUC1          13C
P1            8.60 usec
PL1           -3.00 dB
SFO1          100.6228298 MHz
  
```

```

===== CHANNEL f2 =====
CPDPRG2       waltz16
NUC2          1H
PCPD2         80.00 usec
PL12          14.39 dB
PL13          18.00 dB
PL2           -1.00 dB
SFO2          400.1316005 MHz
SI            32768
SF            100.6128330 MHz
WDW           EM
SSB           0
LB            1.00 Hz
GB            0
PC            1.40
  
```

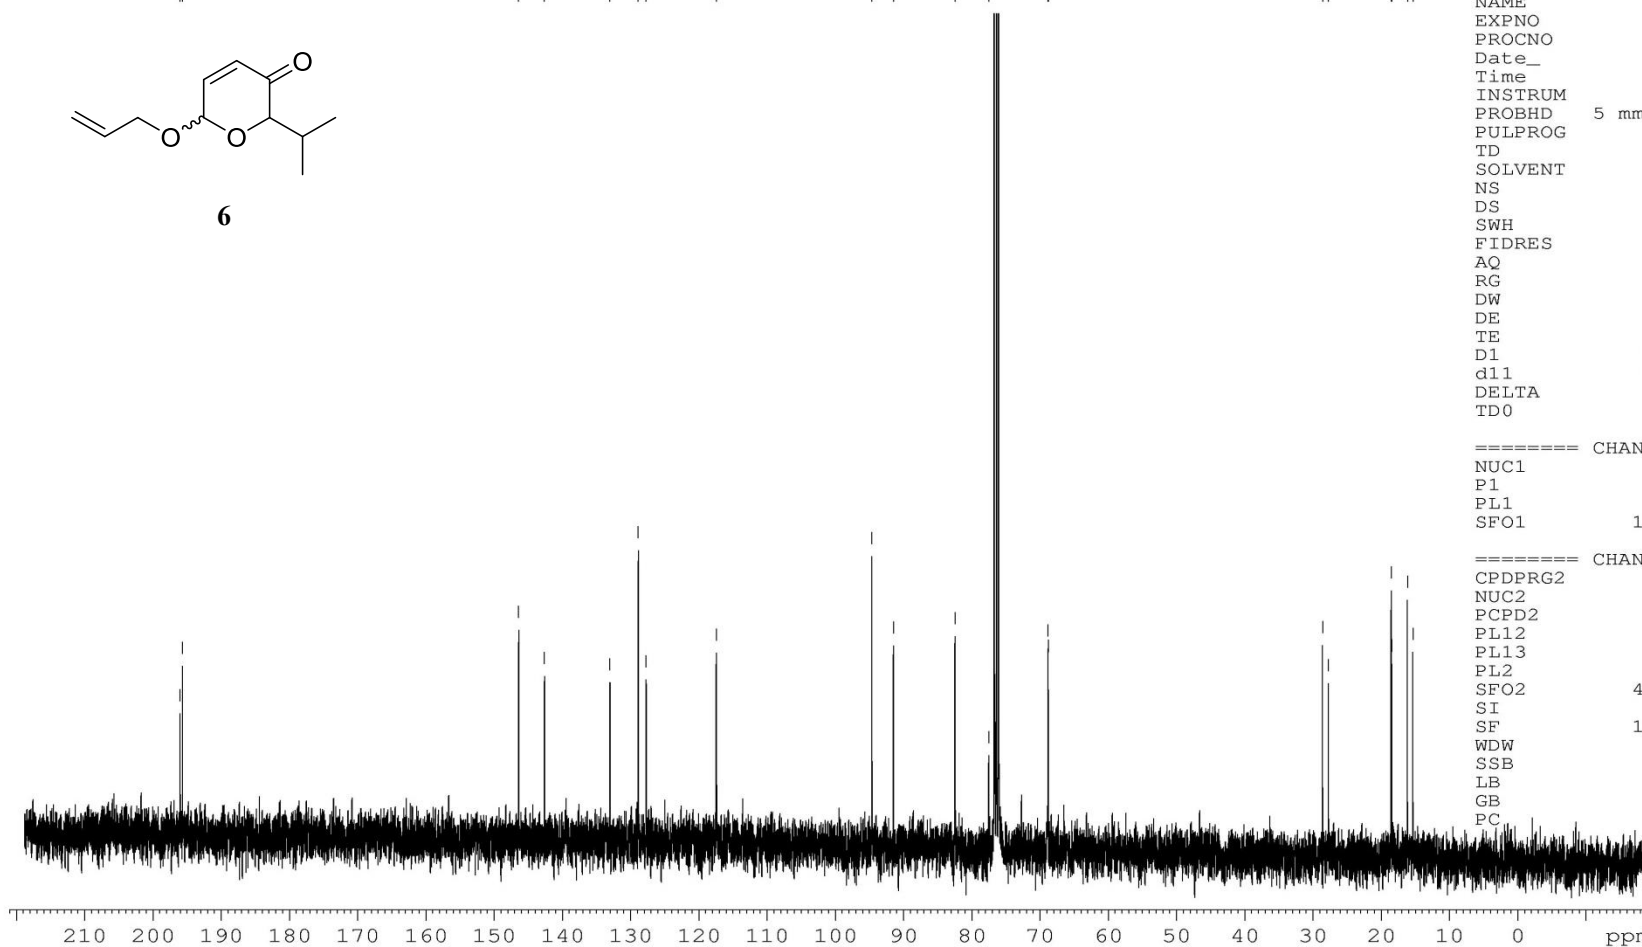



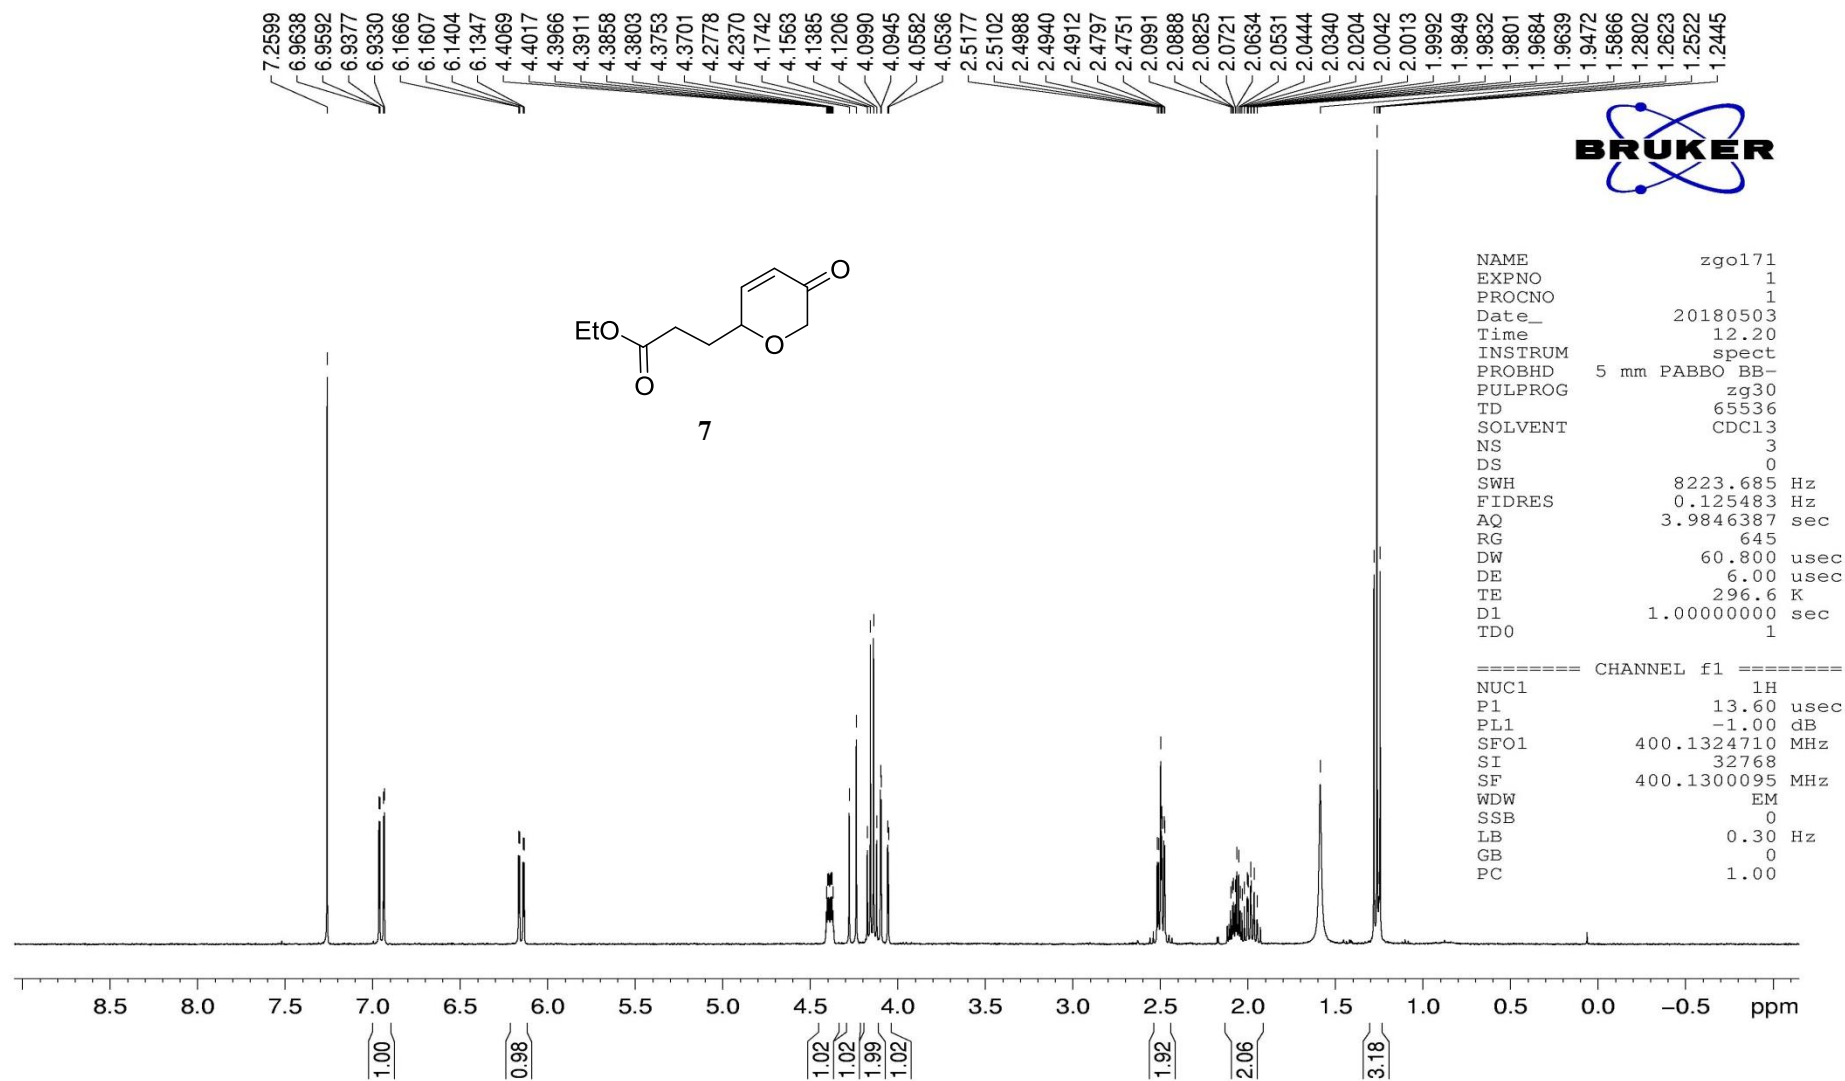

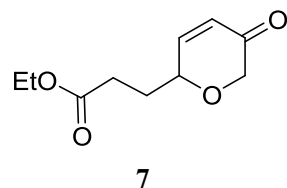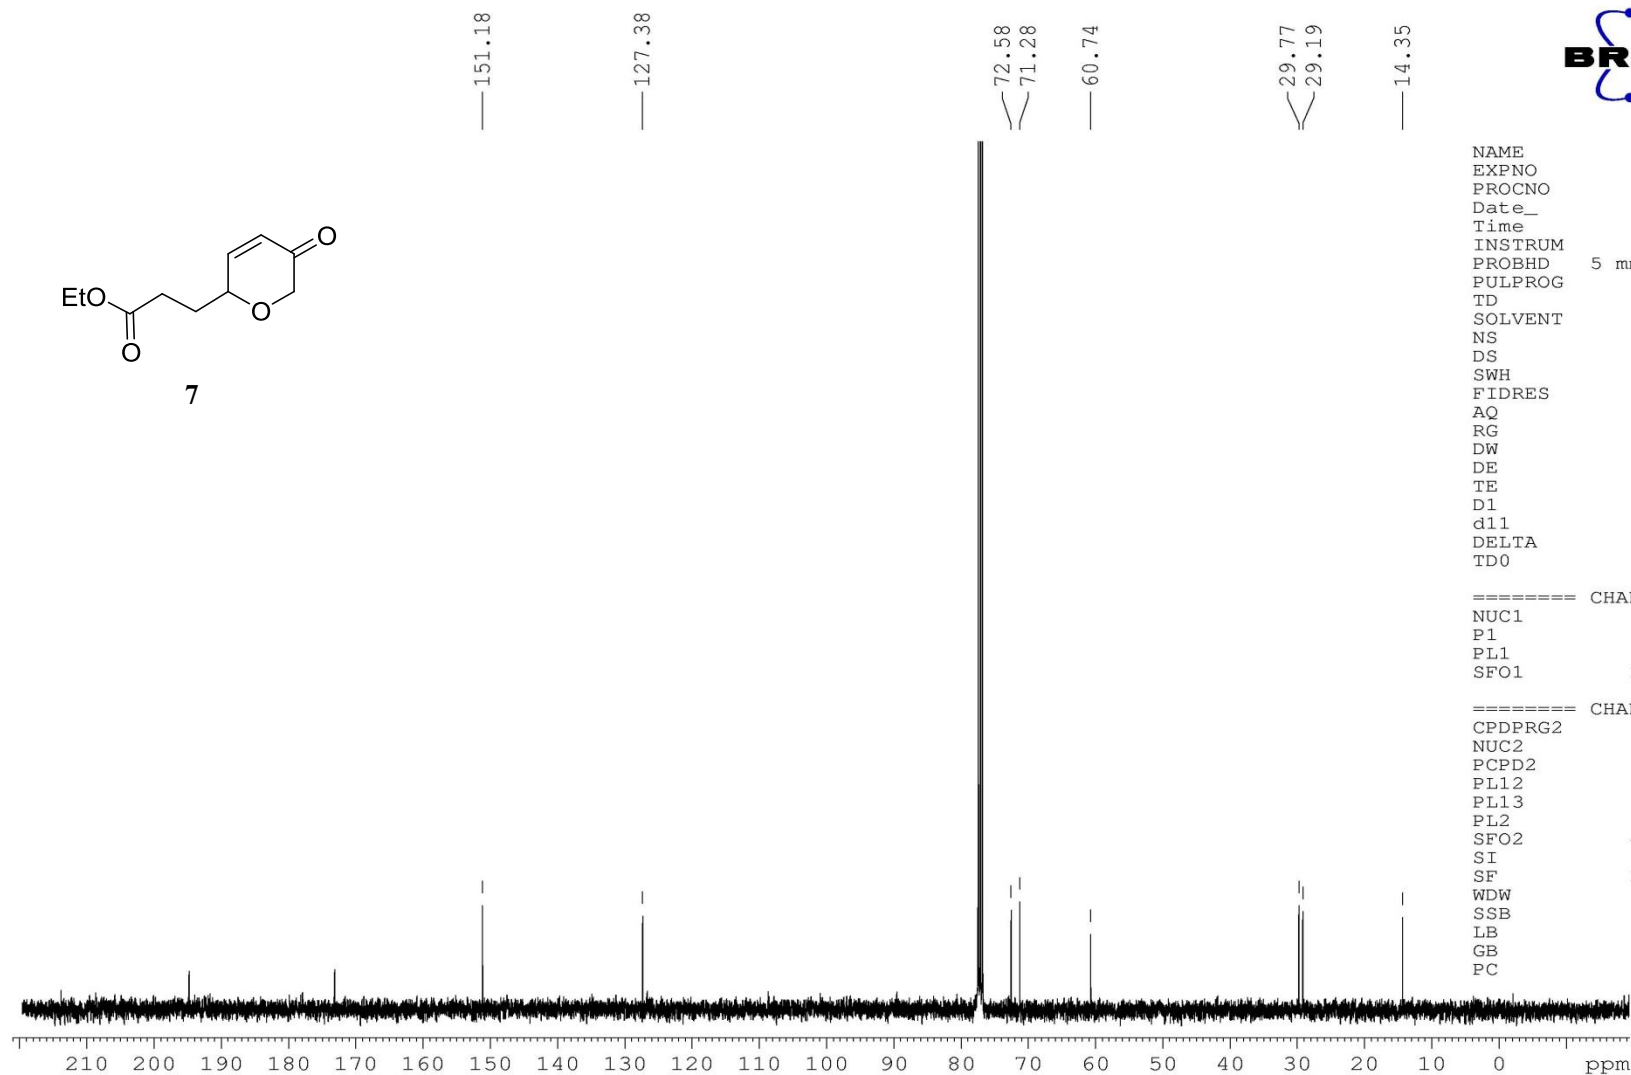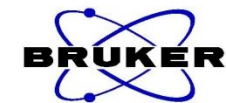

```

NAME                zgo171
EXPNO                2
PROCNO               1
Date_                20180503
Time                12.24
INSTRUM              spect
PROBHD               5 mm PABBO BB-
PULPROG              zgpg30
TD                   65536
SOLVENT              CDC13
NS                   213
DS                   0
SWH                  24038.461 Hz
FIDRES               0.366798 Hz
AQ                   1.3631988 sec
RG                   80.6
DW                   20.800 usec
DE                   6.00 usec
TE                   296.9 K
D1                   2.00000000 sec
d11                  0.03000000 sec
DELTA                1.89999998 sec
TD0                  1
  
```

```

===== CHANNEL f1 =====
NUC1                  13C
P1                    9.25 usec
PL1                   -3.00 dB
SFO1                 100.6228298 MHz
  
```

```

===== CHANNEL f2 =====
CPDPRG2              waltz16
NUC2                  1H
PCPD2                80.00 usec
PL12                 12.45 dB
PL13                 18.00 dB
PL2                  -1.00 dB
SFO2                 400.1316005 MHz
SI                   32768
SF                   100.6127545 MHz
WDW                  EM
SSB                   0
LB                   1.00 Hz
GB                   0
PC                   1.40
  
```

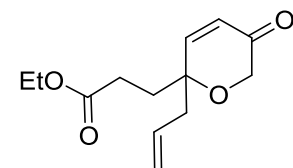

8

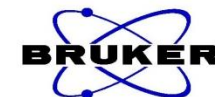

```

NAME                zgo172
EXPNO                1
PROCNO              1
Date_               20180503
Time                12.39
INSTRUM             spect
PROBHD              5 mm PABBO BB-
PULPROG             zg30
TD                  65536
SOLVENT             CDCl3
NS                   3
DS                   0
SWH                 8223.685 Hz
FIDRES              0.125483 Hz
AQ                  3.9846387 sec
RG                   406
DW                  60.800 usec
DE                   6.00 usec
TE                  295.9 K
D1                  1.00000000 sec
TD0                  1
  
```

```

===== CHANNEL f1 =====
NUC1                  1H
P1                   13.60 usec
PL1                   -1.00 dB
SFO1                 400.1324710 MHz
SI                   32768
SF                   400.1300097 MHz
WDW                   EM
SSB                    0
LB                    0.30 Hz
GB                    0
PC                    1.00
  
```

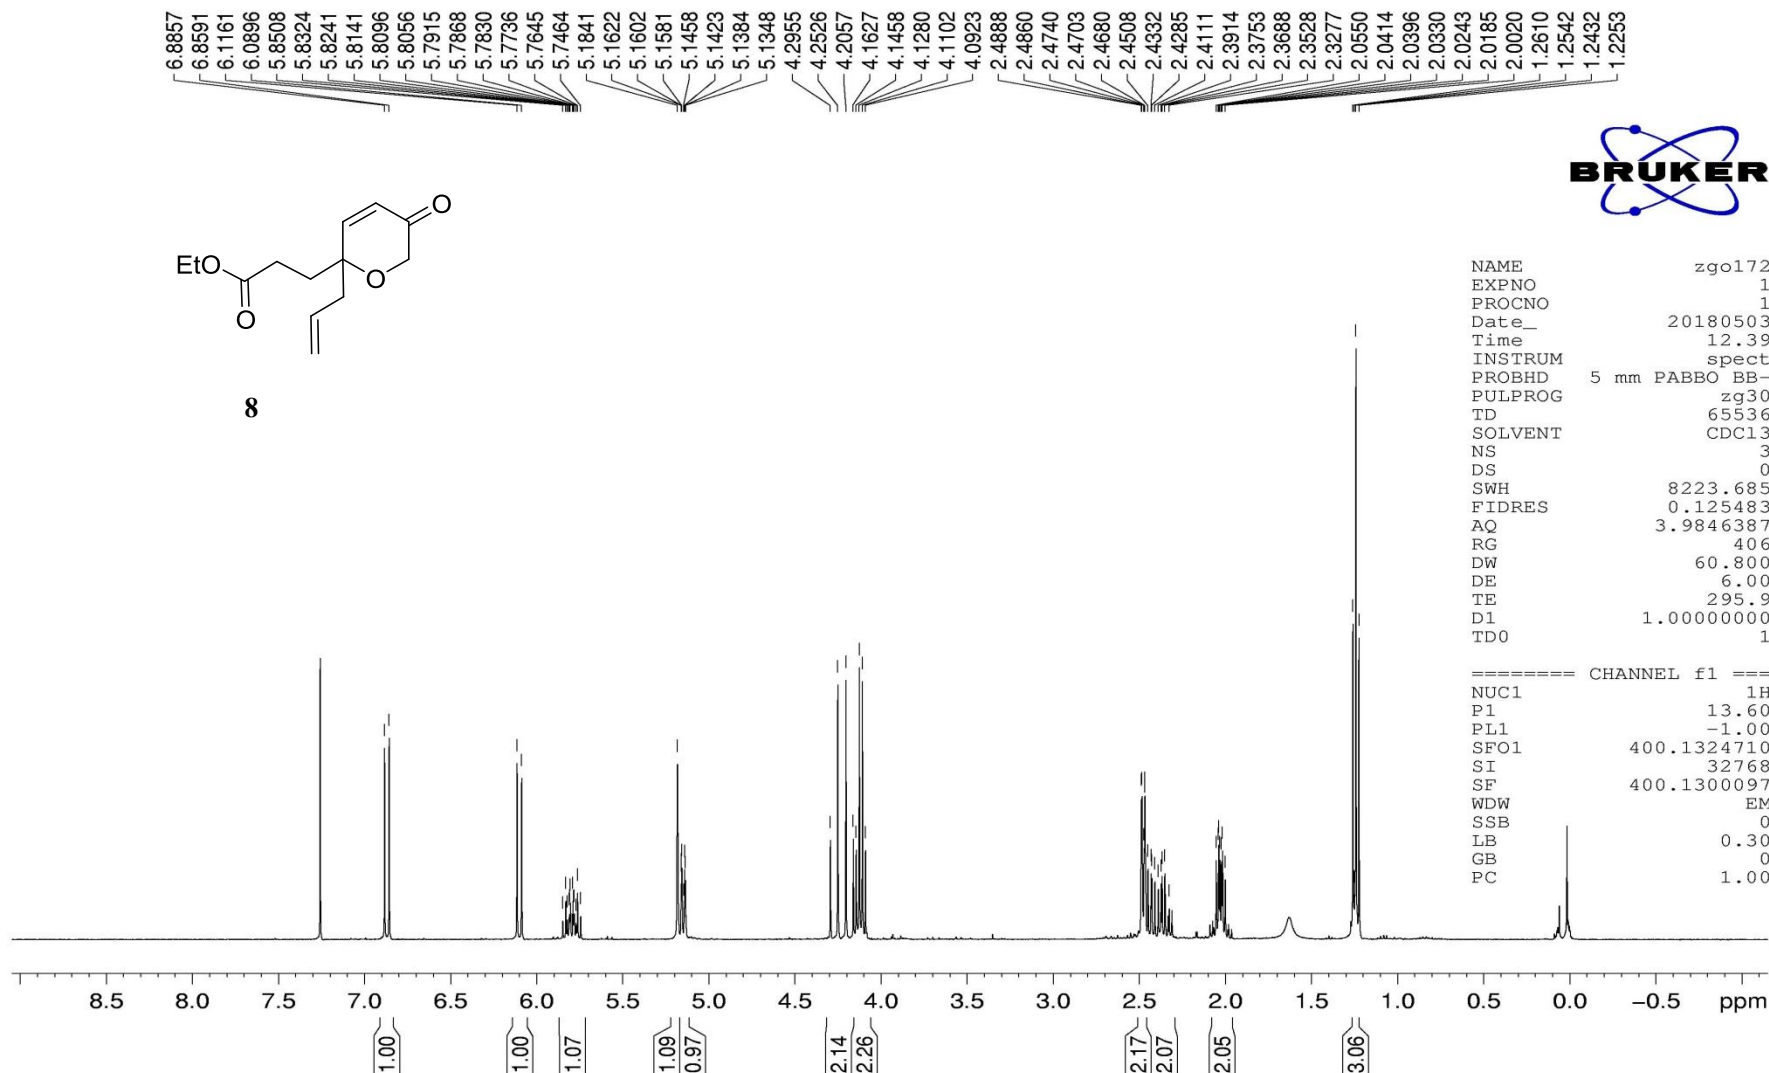

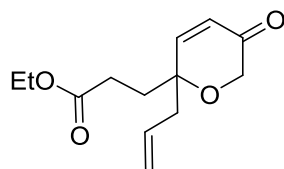

8

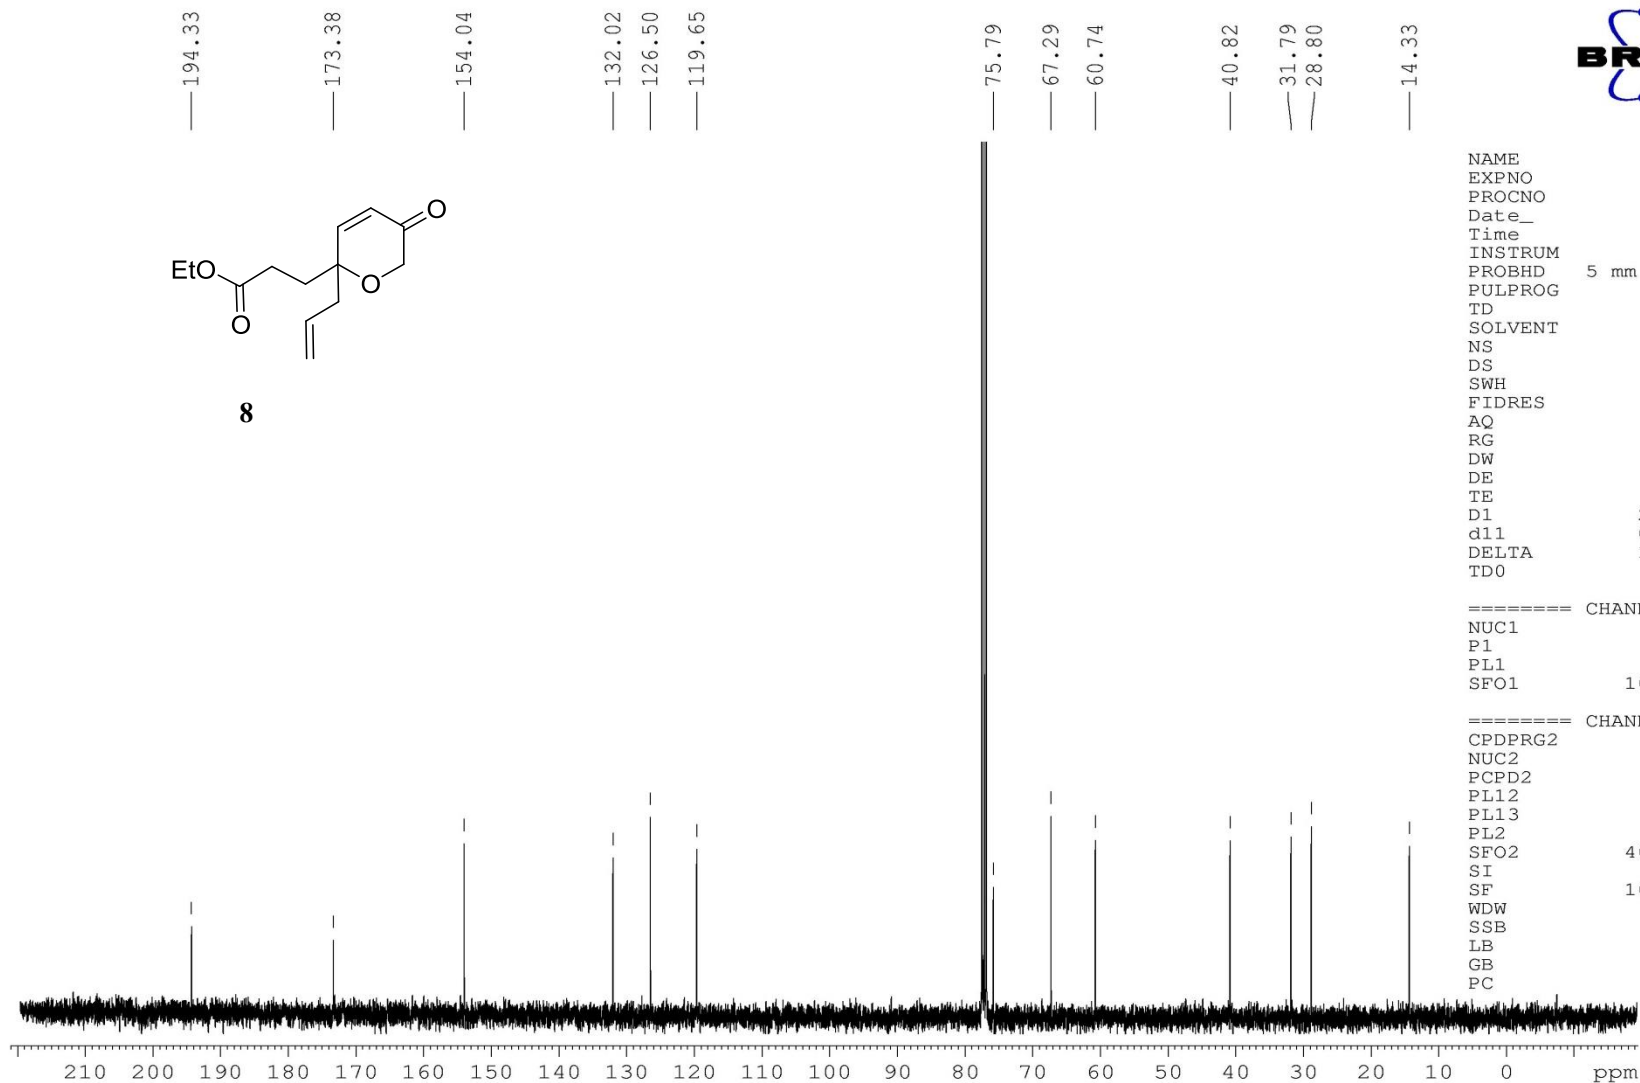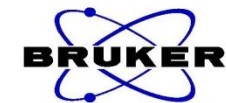

```

NAME                zgo172
EXPNO                2
PROCNO              1
Date_               20180503
Time                12.43
INSTRUM             spect
PROBHD              5 mm PABBO BB-
PULPROG             zgpg30
TD                  65536
SOLVENT             CDCl3
NS                  126
DS                   0
SWH                 24038.461 Hz
FIDRES              0.366798 Hz
AQ                  1.3631988 sec
RG                   114
DW                  20.800 usec
DE                   6.00 usec
TE                   296.3 K
D1                   2.00000000 sec
d11                  0.03000000 sec
DELTA                1.899999998 sec
TD0                  1
  
```

```

===== CHANNEL f1 =====
NUC1                  13C
P1                     9.25 usec
PL1                    -3.00 dB
SFO1                 100.6228298 MHz
  
```

```

===== CHANNEL f2 =====
CPDPRG2              waltz16
NUC2                   1H
PCPD2                  80.00 usec
PL12                   12.45 dB
PL13                   18.00 dB
PL2                     -1.00 dB
SFO2                  400.1316005 MHz
SI                     32768
SF                   100.6127551 MHz
WDW                     EM
SSB                      0
LB                      1.00 Hz
GB                      0
PC                      1.40
  
```
